# Supplementary material for: Genome evolution during progression to breast cancer
Source: HighWire-hosted journal article supplement (doi:10.1101/gr.151670.112), 2013-04-08
Supplement: Supplemental_Data.xlsx [file Supplemental_Data.xlsx]

## Sheet: P1
#CHR	POS	REF	ALT	GATK pattern	Rescue pattern	Lymph:ref	Lymph:alt	Normal:ref	Normal:alt	CCL_cl:ref	CCL_cl:alt	CCL:ref	CCL:alt	ALH:ref	ALH:alt	IDC:ref	IDC:alt	Total coverage	G	G	G	G	G	G	R	R	R	R	R	R	Rescue Diff	Total R
1	4104011	A	T	011111	011111	66	1	54	6	19	2	27	4	41	6	36	4	266	0	1	1	1	1	1	0	1	1	1	1	1	0	5
1	5855951	C	A	001000	101000	117	2	38	1	15	5	42	1	56	0	25	0	302	0	0	1	0	0	0	1	0	1	0	0	0	1	2
1	5933478	C	A	000011	000011	103	0	57	0	28	0	31	0	39	7	25	9	299	0	0	0	0	1	1	0	0	0	0	1	1	0	2
1	6313898	C	T	000010	000010	125	1	35	0	23	0	31	0	28	7	38	0	288	0	0	0	0	1	0	0	0	0	0	1	0	0	1
1	6496164	C	T	000111	110111	116	12	76	7	36	1	48	6	72	9	49	6	438	0	0	0	1	1	1	1	1	0	1	1	1	2	5
1	7491387	C	T	001000	001000	89	0	57	0	20	8	48	1	63	0	53	0	339	0	0	1	0	0	0	0	0	1	0	0	0	0	1
1	9957057	G	A	000100	000100	116	0	69	0	33	0	47	10	72	0	75	0	422	0	0	0	1	0	0	0	0	0	1	0	0	0	1
1	10394186	C	G	000100	110111	70	3	45	4	25	1	36	10	53	3	61	6	317	0	0	0	1	0	0	1	1	0	1	1	1	4	5
1	10394202	T	A	000100	000100	60	1	44	1	23	0	41	6	45	0	56	1	278	0	0	0	1	0	0	0	0	0	1	0	0	0	1
1	11518490	T	C	010000	010000	114	0	56	9	30	0	46	0	89	0	60	0	404	0	1	0	0	0	0	0	1	0	0	0	0	0	1
1	11936374	A	C	000011	000011	92	1	53	0	35	0	69	0	65	31	60	11	417	0	0	0	0	1	1	0	0	0	0	1	1	0	2
1	12544905	T	C	001000	001000	80	0	125	0	56	11	131	0	106	0	141	0	650	0	0	1	0	0	0	0	0	1	0	0	0	0	1
1	15653602	G	A	000011	100011	55	2	59	0	32	0	58	0	44	19	35	19	323	0	0	0	0	1	1	1	0	0	0	1	1	1	3
1	15835834	G	A	000011	000011	102	0	88	0	49	0	56	0	70	21	52	18	456	0	0	0	0	1	1	0	0	0	0	1	1	0	2
1	17489095	T	G	000011	010011	101	0	75	2	40	0	39	0	45	28	37	25	392	0	0	0	0	1	1	0	1	0	0	1	1	1	3
1	24896825	T	A	000011	000011	46	0	69	1	42	0	95	0	37	18	59	14	381	0	0	0	0	1	1	0	0	0	0	1	1	0	2
1	25502984	A	C	000011	000011	56	0	100	0	47	0	114	0	46	18	48	15	444	0	0	0	0	1	1	0	0	0	0	1	1	0	2
1	27607488	T	C	000011	000011	31	0	80	0	32	0	74	0	24	17	51	20	329	0	0	0	0	1	1	0	0	0	0	1	1	0	2
1	28077562	C	A	000011	000011	96	0	92	1	61	0	90	0	53	20	58	13	484	0	0	0	0	1	1	0	0	0	0	1	1	0	2
1	28238727	A	G	000011	000011	92	0	81	0	52	0	116	0	54	20	66	32	513	0	0	0	0	1	1	0	0	0	0	1	1	0	2
1	31811243	A	G	000011	000011	73	0	101	0	49	0	92	0	63	19	60	23	480	0	0	0	0	1	1	0	0	0	0	1	1	0	2
1	32679455	C	T	011001	111001	54	4	38	6	22	4	48	0	45	1	40	4	266	0	1	1	0	0	1	1	1	1	0	0	1	1	4
1	32679491	G	C	111001	111001	49	4	41	6	28	4	52	1	49	1	39	4	278	1	1	1	0	0	1	1	1	1	0	0	1	0	4
1	32679504	C	A	011001	111001	54	4	39	6	32	4	52	0	49	1	41	4	286	0	1	1	0	0	1	1	1	1	0	0	1	1	4
1	33650967	T	G	011000	111100	129	4	81	12	43	6	76	6	96	1	80	1	535	0	1	1	0	0	0	1	1	1	1	0	0	2	4
1	36848032	G	A	000011	000011	126	0	109	0	71	0	110	1	75	21	67	30	610	0	0	0	0	1	1	0	0	0	0	1	1	0	2
1	37165933	C	T	111101	111101	29	4	24	6	12	9	24	6	42	0	19	6	181	1	1	1	1	0	1	1	1	1	1	0	1	0	5
1	37165934	T	G	111101	111101	28	4	24	6	13	9	25	6	44	0	18	6	183	1	1	1	1	0	1	1	1	1	1	0	1	0	5
1	38762467	T	A	000011	000011	91	0	84	0	37	0	71	0	70	23	54	17	447	0	0	0	0	1	1	0	0	0	0	1	1	0	2
1	39638784	C	T	000100	000100	108	0	116	0	62	0	95	15	122	0	116	0	634	0	0	0	1	0	0	0	0	0	1	0	0	0	1
1	40420180	A	T	000001	000001	103	0	93	0	47	0	73	0	111	0	67	9	503	0	0	0	0	0	1	0	0	0	0	0	1	0	1
1	40747058	C	T	000010	010111	49	1	115	8	54	1	109	8	62	18	115	7	547	0	0	0	0	1	0	0	1	0	1	1	1	3	4
1	42409236	C	T	000010	000010	43	0	88	0	49	0	98	1	63	10	106	0	458	0	0	0	0	1	0	0	0	0	0	1	0	0	1
1	43464472	C	T	000011	000011	90	0	82	0	35	1	72	0	66	22	56	25	449	0	0	0	0	1	1	0	0	0	0	1	1	0	2
1	49047200	T	C	000100	000100	77	0	126	0	64	0	99	16	107	0	109	1	599	0	0	0	1	0	0	0	0	0	1	0	0	0	1
1	54282479	G	T	000010	000010	81	0	137	1	65	0	120	0	101	17	133	0	655	0	0	0	0	1	0	0	0	0	0	1	0	0	1
1	56133061	C	T	111101	111101	62	13	72	9	35	5	42	8	29	1	45	5	326	1	1	1	1	0	1	1	1	1	1	0	1	0	5
1	56410434	G	A	010000	010000	68	0	120	18	62	0	112	0	73	0	106	0	559	0	1	0	0	0	0	0	1	0	0	0	0	0	1
1	56629887	C	T	000011	000011	67	0	171	0	72	1	130	1	66	19	89	37	653	0	0	0	0	1	1	0	0	0	0	1	1	0	2
1	67060875	C	T	000011	000011	131	0	162	1	68	0	114	1	109	42	84	28	740	0	0	0	0	1	1	0	0	0	0	1	1	0	2
1	68718414	T	C	111101	111101	22	2	44	4	31	3	46	5	26	1	44	4	232	1	1	1	1	0	1	1	1	1	1	0	1	0	5
1	70108444	A	G	000011	000011	73	0	131	0	72	0	122	0	65	30	69	39	601	0	0	0	0	1	1	0	0	0	0	1	1	0	2
1	71044865	C	A	000011	000011	83	1	174	0	61	1	126	1	109	35	113	35	739	0	0	0	0	1	1	0	0	0	0	1	1	0	2
1	71121120	G	C	101001	111101	67	10	110	5	45	5	94	3	84	1	86	8	518	1	0	1	0	0	1	1	1	1	1	0	1	2	5
1	71529904	G	C	000011	000011	67	0	152	0	80	0	156	1	85	32	135	39	747	0	0	0	0	1	1	0	0	0	0	1	1	0	2
1	72394006	C	T	100000	110111	47	9	91	2	45	1	84	7	57	3	69	4	419	1	0	0	0	0	0	1	1	0	1	1	1	4	5
1	72550582	G	A	001000	001000	54	0	145	1	51	12	124	0	69	0	137	0	593	0	0	1	0	0	0	0	0	1	0	0	0	0	1
1	72793387	T	G	100100	110100	20	3	45	3	27	0	38	6	28	0	41	1	212	1	0	0	1	0	0	1	1	0	1	0	0	1	3
1	74526055	C	T	000010	000010	48	0	115	0	49	0	77	0	62	11	109	0	471	0	0	0	0	1	0	0	0	0	0	1	0	0	1
1	75351529	G	T	000011	000011	119	0	116	0	59	0	87	0	61	34	60	20	556	0	0	0	0	1	1	0	0	0	0	1	1	0	2
1	80876346	G	A	000100	000100	44	0	136	0	47	0	125	16	73	0	109	1	551	0	0	0	1	0	0	0	0	0	1	0	0	0	1
1	81937134	C	T	001000	001000	50	0	101	1	38	8	89	1	40	1	84	0	413	0	0	1	0	0	0	0	0	1	0	0	0	0	1
1	82798584	G	T	010001	010101	19	1	30	6	23	0	28	4	26	1	22	2	162	0	1	0	0	0	1	0	1	0	1	0	1	1	3
1	84317057	A	C	000011	000011	111	0	152	0	64	0	133	0	88	45	86	22	701	0	0	0	0	1	1	0	0	0	0	1	1	0	2
1	88584098	A	T	000011	000011	68	0	111	0	58	0	116	0	65	20	79	26	543	0	0	0	0	1	1	0	0	0	0	1	1	0	2
1	91092468	T	A	000011	000011	98	0	108	0	56	1	87	0	76	33	71	25	555	0	0	0	0	1	1	0	0	0	0	1	1	0	2
1	91928764	C	T	001000	001000	163	1	106	0	42	7	74	0	100	0	72	0	565	0	0	1	0	0	0	0	0	1	0	0	0	0	1
1	93147288	C	T	000010	000010	91	0	115	0	58	0	103	0	79	10	101	0	557	0	0	0	0	1	0	0	0	0	0	1	0	0	1
1	94584069	G	T	000011	000011	74	0	95	0	44	0	74	1	65	30	49	22	454	0	0	0	0	1	1	0	0	0	0	1	1	0	2
1	95415685	A	G	000100	000100	128	0	101	1	40	0	83	17	139	0	116	0	625	0	0	0	1	0	0	0	0	0	1	0	0	0	1
1	95946358	G	T	000011	000011	85	0	116	0	49	0	76	0	62	28	52	19	487	0	0	0	0	1	1	0	0	0	0	1	1	0	2
1	97820846	A	G	000011	000011	24	0	104	1	44	0	95	0	38	17	76	17	416	0	0	0	0	1	1	0	0	0	0	1	1	0	2
1	102122948	G	A	000100	000100	145	0	111	0	46	1	57	11	85	0	78	0	534	0	0	0	1	0	0	0	0	0	1	0	0	0	1
1	104877683	G	A	000011	000011	54	0	114	1	55	0	111	1	72	19	73	18	518	0	0	0	0	1	1	0	0	0	0	1	1	0	2
1	105720086	G	A	000001	000001	37	0	109	1	51	0	119	0	44	0	87	13	461	0	0	0	0	0	1	0	0	0	0	0	1	0	1
1	106880591	G	A	000011	000011	72	0	133	0	53	0	96	1	62	24	80	35	556	0	0	0	0	1	1	0	0	0	0	1	1	0	2
1	108688527	G	A	000100	000100	61	0	125	1	71	0	120	17	95	0	133	0	623	0	0	0	1	0	0	0	0	0	1	0	0	0	1
1	109465767	A	G	100100	111110	68	12	87	8	50	4	73	9	53	3	76	1	444	1	0	0	1	0	0	1	1	1	1	1	0	3	5
1	111640299	C	G	000011	000011	79	0	128	1	56	0	74	1	104	44	64	19	570	0	0	0	0	1	1	0	0	0	0	1	1	0	2
1	114366714	T	C	001000	001001	67	0	91	1	28	6	94	1	70	0	83	2	443	0	0	1	0	0	0	0	0	1	0	0	1	1	2
1	116108927	G	T	000010	110111	31	3	75	7	55	0	76	12	47	10	73	8	397	0	0	0	0	1	0	1	1	0	1	1	1	4	5
1	119172804	T	C	000010	000011	101	0	139	0	55	0	99	0	74	17	112	2	599	0	0	0	0	1	0	0	0	0	0	1	1	1	2
1	120528039	G	T	000011	000011	58	0	157	1	56	0	147	0	57	36	101	36	649	0	0	0	0	1	1	0	0	0	0	1	1	0	2
1	146500529	G	A	000011	000011	82	0	101	1	57	0	101	0	72	74	72	61	621	0	0	0	0	1	1	0	0	0	0	1	1	0	2
1	149128882	G	A	001100	011110	20	1	32	4	18	4	26	7	43	4	31	0	190	0	0	1	1	0	0	0	1	1	1	1	0	2	4
1	150826941	A	G	001000	111110	32	7	22	3	18	7	30	2	33	3	42	1	200	0	0	1	0	0	0	1	1	1	1	1	0	4	5
1	152434286	G	T	000011	110111	37	9	43	12	29	0	40	8	50	16	60	20	324	0	0	0	0	1	1	1	1	0	1	1	1	3	5
1	152698917	C	A	000011	000011	124	0	82	0	46	0	50	0	99	30	70	31	532	0	0	0	0	1	1	0	0	0	0	1	1	0	2
1	153291721	G	A	000011	100111	56	6	124	1	68	1	109	2	79	34	75	23	578	0	0	0	0	1	1	1	0	0	1	1	1	2	4
1	154051619	T	C	100000	100000	24	6	57	0	30	0	52	0	29	0	45	0	243	1	0	0	0	0	0	1	0	0	0	0	0	0	1
1	154285610	G	A	000011	000011	173	0	90	1	35	0	67	0	97	45	70	15	593	0	0	0	0	1	1	0	0	0	0	1	1	0	2
1	155137109	C	T	001000	001000	85	0	68	1	39	7	75	0	67	0	80	1	423	0	0	1	0	0	0	0	0	1	0	0	0	0	1
1	159187900	G	T	011101	011111	35	0	23	5	15	5	21	8	29	3	33	4	181	0	1	1	1	0	1	0	1	1	1	1	1	1	5
1	164245885	G	A	001000	011111	28	1	92	4	30	7	65	4	56	2	94	3	386	0	0	1	0	0	0	0	1	1	1	1	1	4	5
1	164342660	A	C	000011	000011	69	0	134	1	61	0	119	0	103	28	103	34	652	0	0	0	0	1	1	0	0	0	0	1	1	0	2
1	169956724	C	T	000011	000011	136	0	162	1	75	0	88	0	119	25	132	36	774	0	0	0	0	1	1	0	0	0	0	1	1	0	2
1	170694381	A	T	000011	000011	36	0	92	0	50	0	77	0	46	10	85	15	411	0	0	0	0	1	1	0	0	0	0	1	1	0	2
1	170827887	T	C	000100	000100	49	0	81	0	55	0	69	12	89	0	102	0	457	0	0	0	1	0	0	0	0	0	1	0	0	0	1
1	172454369	G	A	000011	000011	70	0	78	0	49	0	63	0	68	15	86	22	451	0	0	0	0	1	1	0	0	0	0	1	1	0	2
1	174252833	C	T	001000	001000	144	0	116	0	46	11	90	1	89	0	101	1	599	0	0	1	0	0	0	0	0	1	0	0	0	0	1
1	175741961	G	A	010000	010000	101	0	71	11	37	0	59	0	94	1	74	0	448	0	1	0	0	0	0	0	1	0	0	0	0	0	1
1	179384512	G	A	010000	010010	57	0	81	16	42	1	92	0	110	2	123	1	525	0	1	0	0	0	0	0	1	0	0	1	0	1	2
1	179802146	C	T	000011	000011	92	0	55	0	32	1	60	0	36	17	63	10	366	0	0	0	0	1	1	0	0	0	0	1	1	0	2
1	180239614	T	G	000011	000011	105	0	102	0	41	0	78	0	80	25	87	14	532	0	0	0	0	1	1	0	0	0	0	1	1	0	2
1	181955338	G	C	000001	000001	98	0	106	0	51	0	103	0	120	0	78	15	571	0	0	0	0	0	1	0	0	0	0	0	1	0	1
1	184578379	G	C	000100	000100	105	0	126	0	68	0	96	16	178	0	162	0	751	0	0	0	1	0	0	0	0	0	1	0	0	0	1
1	187216205	T	A	000100	000100	42	0	168	0	63	0	136	21	164	0	160	0	754	0	0	0	1	0	0	0	0	0	1	0	0	0	1
1	189675458	C	A	000011	000011	120	0	148	0	75	0	114	0	124	36	118	34	769	0	0	0	0	1	1	0	0	0	0	1	1	0	2
1	190614927	T	C	000011	000011	26	0	119	1	61	0	102	0	53	24	103	28	517	0	0	0	0	1	1	0	0	0	0	1	1	0	2
1	191133571	G	A	000011	000011	101	0	58	1	46	0	61	0	39	14	71	24	415	0	0	0	0	1	1	0	0	0	0	1	1	0	2
1	192400868	C	T	000011	000011	79	0	146	0	51	0	100	0	74	24	98	26	598	0	0	0	0	1	1	0	0	0	0	1	1	0	2
1	193212607	A	G	001000	001000	28	0	106	0	38	6	110	0	56	0	97	0	441	0	0	1	0	0	0	0	0	1	0	0	0	0	1
1	193813083	G	T	000011	000011	24	0	73	0	38	0	73	0	38	7	71	14	338	0	0	0	0	1	1	0	0	0	0	1	1	0	2
1	196033145	C	T	001000	011000	56	0	122	2	42	10	124	0	115	0	152	0	623	0	0	1	0	0	0	0	1	1	0	0	0	1	2
1	197128115	T	C	000010	000010	38	0	152	0	65	0	147	0	107	13	181	0	703	0	0	0	0	1	0	0	0	0	0	1	0	0	1
1	197804309	C	T	010000	010000	81	0	72	16	39	0	77	0	90	0	102	0	477	0	1	0	0	0	0	0	1	0	0	0	0	0	1
1	198572706	A	G	000011	000011	49	0	116	0	44	0	104	0	51	11	91	17	483	0	0	0	0	1	1	0	0	0	0	1	1	0	2
1	201150621	C	T	101100	101111	60	9	99	1	34	6	58	7	120	9	82	3	488	1	0	1	1	0	0	1	0	1	1	1	1	2	5
1	202706069	G	C	000100	000100	146	0	105	0	52	0	62	10	110	0	149	0	634	0	0	0	1	0	0	0	0	0	1	0	0	0	1
1	205779276	G	T	000011	000011	154	0	91	0	49	0	49	1	130	27	74	16	591	0	0	0	0	1	1	0	0	0	0	1	1	0	2
1	210020092	C	T	000011	000011	85	0	103	0	56	0	88	0	101	26	113	25	597	0	0	0	0	1	1	0	0	0	0	1	1	0	2
1	210505343	A	G	010000	010000	138	0	104	15	49	0	140	0	159	0	149	0	754	0	1	0	0	0	0	0	1	0	0	0	0	0	1
1	213355288	T	C	000010	000010	42	0	123	0	61	0	125	0	114	12	157	1	635	0	0	0	0	1	0	0	0	0	0	1	0	0	1
1	213819156	G	A	000011	000011	110	0	112	0	51	0	100	0	92	40	88	17	610	0	0	0	0	1	1	0	0	0	0	1	1	0	2
1	219214016	G	T	000011	000011	48	0	134	0	41	1	101	0	58	19	102	25	529	0	0	0	0	1	1	0	0	0	0	1	1	0	2
1	219414068	C	T	000011	000011	70	0	125	0	46	0	118	0	71	17	88	21	556	0	0	0	0	1	1	0	0	0	0	1	1	0	2
1	219900361	C	G	000011	000011	33	0	109	0	62	0	134	0	54	23	98	31	544	0	0	0	0	1	1	0	0	0	0	1	1	0	2
1	221287565	T	C	000011	000011	65	0	113	0	54	0	129	0	91	28	116	19	615	0	0	0	0	1	1	0	0	0	0	1	1	0	2
1	221589788	G	A	010000	010100	34	0	69	11	47	1	77	2	58	0	78	0	377	0	1	0	0	0	0	0	1	0	1	0	0	1	2
1	225031395	C	T	000011	000011	109	0	88	0	40	0	62	0	46	53	43	33	474	0	0	0	0	1	1	0	0	0	0	1	1	0	2
1	226674385	T	G	000011	000011	57	1	136	0	70	0	126	1	67	66	83	71	678	0	0	0	0	1	1	0	0	0	0	1	1	0	2
1	227445875	G	A	000011	000011	38	0	63	0	35	0	47	0	44	13	63	30	333	0	0	0	0	1	1	0	0	0	0	1	1	0	2
1	227558438	T	C	001000	011000	83	0	74	2	30	7	83	0	84	0	91	0	454	0	0	1	0	0	0	0	1	1	0	0	0	1	2
1	227853568	G	C	000011	000011	61	0	108	0	62	0	118	0	98	25	105	28	605	0	0	0	0	1	1	0	0	0	0	1	1	0	2
1	228406632	G	A	000011	000011	97	0	49	0	24	0	37	1	66	10	26	16	326	0	0	0	0	1	1	0	0	0	0	1	1	0	2
1	229163726	A	C	100010	110111	40	28	50	15	41	0	34	13	41	27	44	18	351	1	0	0	0	1	0	1	1	0	1	1	1	3	5
1	229217558	T	C	000100	000100	87	0	147	0	76	0	105	18	165	0	171	0	769	0	0	0	1	0	0	0	0	0	1	0	0	0	1
1	230483605	T	C	000011	000011	98	0	98	0	37	0	70	0	70	19	82	16	490	0	0	0	0	1	1	0	0	0	0	1	1	0	2
1	235703627	A	T	000001	000001	116	0	122	0	43	0	91	0	106	0	101	14	593	0	0	0	0	0	1	0	0	0	0	0	1	0	1
1	236282466	G	A	000011	010011	84	0	58	2	34	0	55	0	56	14	82	16	401	0	0	0	0	1	1	0	1	0	0	1	1	1	3
1	236408410	C	A	000100	000100	67	0	89	1	36	0	56	13	54	0	87	0	403	0	0	0	1	0	0	0	0	0	1	0	0	0	1
1	237097408	G	A	101100	111110	77	20	79	13	36	9	57	6	81	6	96	1	481	1	0	1	1	0	0	1	1	1	1	1	0	2	5
1	237558671	C	A	000011	000011	45	0	97	1	42	0	91	1	67	14	75	28	461	0	0	0	0	1	1	0	0	0	0	1	1	0	2
1	237558672	C	A	000011	000011	44	0	98	1	41	0	90	0	70	15	76	27	462	0	0	0	0	1	1	0	0	0	0	1	1	0	2
1	237909540	T	C	000011	000011	26	0	106	0	52	0	104	0	39	20	102	21	470	0	0	0	0	1	1	0	0	0	0	1	1	0	2
1	238110260	G	A	001000	001000	91	1	69	1	25	5	57	0	62	1	68	0	380	0	0	1	0	0	0	0	0	1	0	0	0	0	1
1	238150657	C	T	000011	000011	60	0	113	0	58	0	103	0	59	12	91	20	516	0	0	0	0	1	1	0	0	0	0	1	1	0	2
1	238888057	A	T	000011	000011	37	0	142	0	63	0	135	1	60	18	110	20	586	0	0	0	0	1	1	0	0	0	0	1	1	0	2
1	239624270	G	A	000011	000011	59	0	156	0	62	0	141	0	86	32	120	27	683	0	0	0	0	1	1	0	0	0	0	1	1	0	2
1	239832367	C	T	000100	000100	102	0	117	0	43	0	77	10	137	0	134	0	620	0	0	0	1	0	0	0	0	0	1	0	0	0	1
1	241096703	C	G	000011	000011	34	0	92	0	62	0	86	0	50	13	89	17	443	0	0	0	0	1	1	0	0	0	0	1	1	0	2
1	241962504	C	A	000100	110100	31	4	51	6	25	0	32	9	33	0	65	1	257	0	0	0	1	0	0	1	1	0	1	0	0	2	3
1	246803791	A	T	000010	000010	22	0	80	0	61	0	111	0	46	9	110	0	439	0	0	0	0	1	0	0	0	0	0	1	0	0	1
1	247955034	A	G	000011	000011	65	0	67	0	30	1	75	0	68	20	71	17	414	0	0	0	0	1	1	0	0	0	0	1	1	0	2
1	249077810	G	A	000011	000011	114	0	65	0	38	0	45	0	65	23	58	11	419	0	0	0	0	1	1	0	0	0	0	1	1	0	2
2	63230	C	T	000011	000011	75	0	77	0	34	0	92	0	47	27	63	18	433	0	0	0	0	1	1	0	0	0	0	1	1	0	2
2	441097	G	A	000011	000011	141	0	73	0	29	0	54	0	45	16	37	9	404	0	0	0	0	1	1	0	0	0	0	1	1	0	2
2	969357	C	A	000011	000011	39	0	82	0	49	1	68	0	32	8	44	8	331	0	0	0	0	1	1	0	0	0	0	1	1	0	2
2	1217153	C	G	110111	110111	148	18	106	9	55	1	90	13	79	14	86	8	627	1	1	0	1	1	1	1	1	0	1	1	1	0	5
2	3510102	C	T	000011	000011	86	0	143	0	78	0	157	0	77	42	130	41	754	0	0	0	0	1	1	0	0	0	0	1	1	0	2
2	5016417	A	C	000011	000011	71	0	131	0	68	0	111	0	61	30	80	31	583	0	0	0	0	1	1	0	0	0	0	1	1	0	2
2	5123494	T	C	000011	000011	51	0	113	0	50	1	105	0	49	15	85	19	488	0	0	0	0	1	1	0	0	0	0	1	1	0	2
2	5151306	C	T	001001	011101	29	1	80	3	21	5	57	2	48	1	49	7	303	0	0	1	0	0	1	0	1	1	1	0	1	2	4
2	5563447	C	T	000010	000110	67	0	101	0	53	1	91	2	51	8	73	0	447	0	0	0	0	1	0	0	0	0	1	1	0	1	2
2	6173374	G	A	001000	011001	25	0	98	2	43	10	120	1	75	0	121	3	498	0	0	1	0	0	0	0	1	1	0	0	1	2	3
2	6297852	C	A	000011	000011	70	0	69	0	41	0	88	0	31	23	49	18	389	0	0	0	0	1	1	0	0	0	0	1	1	0	2
2	7341778	T	C	000011	000011	36	0	113	0	48	0	107	0	63	13	64	18	462	0	0	0	0	1	1	0	0	0	0	1	1	0	2
2	7693128	G	C	000011	000011	73	0	127	0	57	0	104	0	69	29	78	32	569	0	0	0	0	1	1	0	0	0	0	1	1	0	2
2	11764717	T	C	000011	000011	124	1	72	1	59	0	66	1	40	20	40	12	436	0	0	0	0	1	1	0	0	0	0	1	1	0	2
2	14039993	C	T	000011	000011	30	0	64	1	51	0	65	1	21	6	40	23	302	0	0	0	0	1	1	0	0	0	0	1	1	0	2
2	14881061	C	T	000011	000011	87	0	105	1	51	0	98	0	68	29	61	23	523	0	0	0	0	1	1	0	0	0	0	1	1	0	2
2	15123242	T	C	000011	000011	78	0	105	0	53	0	89	0	47	13	89	28	502	0	0	0	0	1	1	0	0	0	0	1	1	0	2
2	19029252	T	C	000100	000100	103	0	147	1	62	0	93	16	138	0	112	0	672	0	0	0	1	0	0	0	0	0	1	0	0	0	1
2	22441336	A	T	000010	000010	80	0	140	1	65	1	122	0	78	13	99	0	599	0	0	0	0	1	0	0	0	0	0	1	0	0	1
2	22590856	T	A	000011	000011	93	0	124	0	57	0	110	0	108	17	78	18	605	0	0	0	0	1	1	0	0	0	0	1	1	0	2
2	23915250	G	T	001000	001000	127	0	42	1	21	5	42	0	53	0	39	0	330	0	0	1	0	0	0	0	0	1	0	0	0	0	1
2	24751774	G	T	000011	100011	94	3	109	1	55	0	102	0	64	30	74	31	563	0	0	0	0	1	1	1	0	0	0	1	1	1	3
2	27189057	G	A	000011	000011	73	0	57	0	31	0	46	0	29	12	37	9	294	0	0	0	0	1	1	0	0	0	0	1	1	0	2
2	27662899	G	T	000001	110101	31	2	33	10	23	1	36	3	21	1	23	7	191	0	0	0	0	0	1	1	1	0	1	0	1	3	4
2	29255436	G	T	000010	110111	49	3	69	10	56	0	62	9	41	12	55	7	373	0	0	0	0	1	0	1	1	0	1	1	1	4	5
2	30160239	G	T	010000	010000	21	0	46	8	28	0	69	0	30	0	45	0	247	0	1	0	0	0	0	0	1	0	0	0	0	0	1
2	31504222	T	G	001000	001000	114	0	165	1	39	10	99	0	127	0	97	0	652	0	0	1	0	0	0	0	0	1	0	0	0	0	1
2	38259818	A	G	000001	000001	102	1	122	0	64	0	98	0	58	0	87	11	543	0	0	0	0	0	1	0	0	0	0	0	1	0	1
2	38479724	A	G	000011	000011	123	0	125	0	60	0	120	0	71	49	96	23	667	0	0	0	0	1	1	0	0	0	0	1	1	0	2
2	39913545	C	G	000100	000100	55	0	108	0	51	0	70	14	74	0	86	0	458	0	0	0	1	0	0	0	0	0	1	0	0	0	1
2	40983689	T	C	100000	110101	19	5	64	3	29	1	73	3	37	1	78	3	316	1	0	0	0	0	0	1	1	0	1	0	1	3	4
2	42013342	C	A	001000	001000	90	0	119	0	38	8	101	1	83	0	87	0	527	0	0	1	0	0	0	0	0	1	0	0	0	0	1
2	43936545	A	T	000011	000011	26	0	119	1	47	0	99	0	34	11	74	16	427	0	0	0	0	1	1	0	0	0	0	1	1	0	2
2	44590979	G	A	001000	011000	95	0	89	2	27	6	86	1	74	0	85	1	466	0	0	1	0	0	0	0	1	1	0	0	0	1	2
2	50217139	G	T	000011	000011	72	1	141	1	58	0	108	0	61	36	81	28	587	0	0	0	0	1	1	0	0	0	0	1	1	0	2
2	50830953	C	T	000010	000010	53	0	138	0	48	0	91	0	97	15	143	0	585	0	0	0	0	1	0	0	0	0	0	1	0	0	1
2	50898010	A	G	000100	000100	88	0	184	0	75	0	127	17	100	0	148	0	739	0	0	0	1	0	0	0	0	0	1	0	0	0	1
2	55835469	C	T	001000	011000	119	0	117	6	35	12	119	0	98	0	119	0	625	0	0	1	0	0	0	0	1	1	0	0	0	1	2
2	57174373	G	A	000010	010010	73	0	120	2	57	0	115	1	65	9	106	0	548	0	0	0	0	1	0	0	1	0	0	1	0	1	2
2	59066233	G	T	100010	110111	30	7	55	5	48	0	55	7	48	14	53	12	334	1	0	0	0	1	0	1	1	0	1	1	1	3	5
2	59862873	T	C	000011	000011	34	0	133	1	42	0	121	0	34	21	55	52	493	0	0	0	0	1	1	0	0	0	0	1	1	0	2
2	62558235	T	G	000010	000010	75	0	105	1	41	0	64	0	64	12	75	1	438	0	0	0	0	1	0	0	0	0	0	1	0	0	1
2	63937952	G	C	001000	001000	56	0	108	0	43	11	104	0	95	1	110	0	528	0	0	1	0	0	0	0	0	1	0	0	0	0	1
2	66650881	G	A	000011	000011	53	0	124	1	56	0	157	1	66	24	86	28	596	0	0	0	0	1	1	0	0	0	0	1	1	0	2
2	67642704	T	A	000011	000011	37	0	134	0	65	1	113	0	43	14	76	29	512	0	0	0	0	1	1	0	0	0	0	1	1	0	2
2	74349353	G	C	000010	000010	59	0	67	0	44	0	62	0	39	9	62	0	342	0	0	0	0	1	0	0	0	0	0	1	0	0	1
2	74350141	G	C	000010	000010	79	0	96	0	33	0	99	0	66	10	101	0	484	0	0	0	0	1	0	0	0	0	0	1	0	0	1
2	78120888	C	A	000001	000011	66	0	131	1	52	0	111	0	102	9	100	13	585	0	0	0	0	0	1	0	0	0	0	1	1	1	2
2	78200042	C	T	000011	000011	110	0	128	0	54	0	98	1	64	40	73	18	586	0	0	0	0	1	1	0	0	0	0	1	1	0	2
2	78944269	T	A	000011	000011	34	0	75	0	39	0	87	0	34	14	54	20	357	0	0	0	0	1	1	0	0	0	0	1	1	0	2
2	80378670	G	A	001000	001000	139	0	123	0	47	8	90	1	101	0	87	0	596	0	0	1	0	0	0	0	0	1	0	0	0	0	1
2	84084057	G	A	000010	000010	82	0	139	0	58	0	107	0	89	14	82	0	571	0	0	0	0	1	0	0	0	0	0	1	0	0	1
2	86787829	T	A	000011	000011	34	0	61	1	30	0	61	0	27	11	31	13	269	0	0	0	0	1	1	0	0	0	0	1	1	0	2
2	91634778	A	G	001000	111010	41	3	49	3	36	5	22	0	39	2	35	1	236	0	0	1	0	0	0	1	1	1	0	1	0	3	4
2	92261168	G	A	010010	111011	29	4	42	8	30	3	21	1	26	11	25	7	207	0	1	0	0	1	0	1	1	1	0	1	1	3	5
2	98796225	C	T	000010	110110	31	2	82	5	37	1	73	2	51	10	66	1	361	0	0	0	0	1	0	1	1	0	1	1	0	3	4
2	100590640	T	C	001000	001000	34	0	115	0	43	8	115	0	62	0	130	0	507	0	0	1	0	0	0	0	0	1	0	0	0	0	1
2	102620337	G	T	000100	000100	181	1	95	0	55	0	60	9	80	1	71	0	553	0	0	0	1	0	0	0	0	0	1	0	0	0	1
2	104416731	A	G	000011	000011	48	0	127	0	64	0	115	0	30	16	73	24	497	0	0	0	0	1	1	0	0	0	0	1	1	0	2
2	105866248	G	C	000011	000011	112	0	66	0	47	0	62	1	40	18	46	11	403	0	0	0	0	1	1	0	0	0	0	1	1	0	2
2	107460741	C	T	000011	000011	48	0	41	0	21	0	34	0	15	7	28	5	199	0	0	0	0	1	1	0	0	0	0	1	1	0	2
2	109935525	G	A	000011	000011	122	0	109	0	59	0	76	0	82	27	58	20	553	0	0	0	0	1	1	0	0	0	0	1	1	0	2
2	111475154	G	A	000011	000011	99	0	129	1	64	1	131	1	66	26	103	34	655	0	0	0	0	1	1	0	0	0	0	1	1	0	2
2	111671329	G	A	000011	000011	121	1	127	0	63	0	109	0	74	32	75	16	618	0	0	0	0	1	1	0	0	0	0	1	1	0	2
2	115164138	C	T	000100	000100	94	0	120	0	55	0	98	16	113	0	89	0	585	0	0	0	1	0	0	0	0	0	1	0	0	0	1
2	120086147	G	A	000011	000011	30	0	83	0	47	0	115	0	23	28	84	24	434	0	0	0	0	1	1	0	0	0	0	1	1	0	2
2	121270749	T	A	111000	111001	44	5	43	4	28	3	36	1	28	0	40	2	234	1	1	1	0	0	0	1	1	1	0	0	1	1	4
2	122706307	A	G	010000	010000	103	0	90	16	50	0	80	0	88	0	62	0	489	0	1	0	0	0	0	0	1	0	0	0	0	0	1
2	123340841	G	A	001010	001110	37	1	74	1	23	7	35	3	45	5	55	1	287	0	0	1	0	1	0	0	0	1	1	1	0	1	3
2	125605056	A	T	000011	000011	131	0	116	0	56	0	83	0	65	40	48	22	561	0	0	0	0	1	1	0	0	0	0	1	1	0	2
2	125823758	T	G	010000	010000	57	0	118	23	59	0	136	0	63	0	130	0	586	0	1	0	0	0	0	0	1	0	0	0	0	0	1
2	125954887	G	A	000010	010010	76	0	151	2	73	0	155	0	92	12	110	0	671	0	0	0	0	1	0	0	1	0	0	1	0	1	2
2	126156080	T	C	000011	000011	34	0	124	0	50	0	133	0	63	25	86	31	546	0	0	0	0	1	1	0	0	0	0	1	1	0	2
2	126420005	C	G	000001	000001	63	0	118	0	56	0	90	0	64	1	71	10	473	0	0	0	0	0	1	0	0	0	0	0	1	0	1
2	126826545	A	G	000011	000111	98	0	200	0	64	0	160	2	66	26	102	32	750	0	0	0	0	1	1	0	0	0	1	1	1	1	3
2	127950311	G	C	000011	000011	70	0	52	0	25	0	35	0	23	20	29	12	266	0	0	0	0	1	1	0	0	0	0	1	1	0	2
2	130052081	G	C	001000	001100	107	1	129	0	57	8	98	2	103	1	85	1	592	0	0	1	0	0	0	0	0	1	1	0	0	1	2
2	132790988	C	T	001000	111010	68	6	140	3	53	7	96	0	92	3	115	1	584	0	0	1	0	0	0	1	1	1	0	1	0	3	4
2	133015353	G	T	001000	101111	161	11	86	1	72	12	70	5	87	8	54	4	571	0	0	1	0	0	0	1	0	1	1	1	1	4	5
2	134135751	G	T	000001	000011	32	0	126	0	45	1	102	0	58	5	94	15	478	0	0	0	0	0	1	0	0	0	0	1	1	1	2
2	135464986	G	C	000100	000100	125	1	93	0	47	0	55	13	87	0	71	0	492	0	0	0	1	0	0	0	0	0	1	0	0	0	1
2	136055537	G	A	000011	000011	53	0	89	0	45	0	69	1	53	18	54	18	400	0	0	0	0	1	1	0	0	0	0	1	1	0	2
2	136184346	G	A	001000	011000	45	1	32	2	16	5	28	0	21	0	23	0	173	0	0	1	0	0	0	0	1	1	0	0	0	1	2
2	139158052	G	C	000001	000001	35	0	124	0	56	0	107	0	84	0	99	12	517	0	0	0	0	0	1	0	0	0	0	0	1	0	1
2	142652240	C	T	001000	001001	46	0	70	0	21	8	39	0	48	0	55	2	289	0	0	1	0	0	0	0	0	1	0	0	1	1	2
2	146552744	G	T	000011	000011	70	0	152	1	63	0	146	0	61	20	106	28	647	0	0	0	0	1	1	0	0	0	0	1	1	0	2
2	146575527	T	A	000011	000011	56	0	121	1	55	0	130	0	50	18	83	24	538	0	0	0	0	1	1	0	0	0	0	1	1	0	2
2	149167356	T	A	000100	000100	48	0	153	1	49	0	116	15	87	0	143	0	612	0	0	0	1	0	0	0	0	0	1	0	0	0	1
2	149833082	G	A	000011	000011	106	0	66	0	42	0	59	0	56	16	48	19	412	0	0	0	0	1	1	0	0	0	0	1	1	0	2
2	150415606	C	A	000001	000001	102	0	85	0	51	0	65	0	59	0	87	12	461	0	0	0	0	0	1	0	0	0	0	0	1	0	1
2	155058574	A	G	001000	001000	75	0	161	0	41	7	125	0	106	0	110	0	625	0	0	1	0	0	0	0	0	1	0	0	0	0	1
2	155389736	T	C	000100	000100	62	0	155	0	50	0	114	18	90	0	105	0	594	0	0	0	1	0	0	0	0	0	1	0	0	0	1
2	156210317	C	T	000100	000100	106	0	116	0	43	0	72	11	97	0	82	0	527	0	0	0	1	0	0	0	0	0	1	0	0	0	1
2	156409027	C	T	000011	000011	47	0	137	0	61	0	152	0	45	16	72	26	556	0	0	0	0	1	1	0	0	0	0	1	1	0	2
2	158245326	C	T	000100	000100	157	0	163	1	61	0	101	15	137	1	143	0	779	0	0	0	1	0	0	0	0	0	1	0	0	0	1
2	166896294	G	A	000100	000100	45	0	107	0	45	0	74	17	58	0	88	0	434	0	0	0	1	0	0	0	0	0	1	0	0	0	1
2	167889499	G	A	000011	000011	156	0	149	1	64	0	93	0	103	35	74	24	699	0	0	0	0	1	1	0	0	0	0	1	1	0	2
2	171390031	G	A	000011	000011	75	1	102	0	51	1	91	1	46	28	58	21	475	0	0	0	0	1	1	0	0	0	0	1	1	0	2
2	175543610	G	A	000011	000011	137	0	130	0	65	0	110	1	81	28	120	18	690	0	0	0	0	1	1	0	0	0	0	1	1	0	2
2	175642324	C	G	000011	000011	149	1	110	0	43	0	87	0	67	32	80	22	591	0	0	0	0	1	1	0	0	0	0	1	1	0	2
2	181507317	T	C	000010	000010	47	0	122	0	64	0	115	0	65	10	105	0	528	0	0	0	0	1	0	0	0	0	0	1	0	0	1
2	184840828	T	A	000011	000011	131	0	110	0	50	0	78	0	78	46	60	23	576	0	0	0	0	1	1	0	0	0	0	1	1	0	2
2	185562337	G	A	000011	000011	28	0	112	0	45	0	110	1	38	18	79	30	461	0	0	0	0	1	1	0	0	0	0	1	1	0	2
2	191909742	C	T	000011	000011	41	0	125	0	59	0	110	0	62	20	103	25	545	0	0	0	0	1	1	0	0	0	0	1	1	0	2
2	193762651	T	G	000011	000011	33	0	107	0	53	0	124	0	51	26	78	29	501	0	0	0	0	1	1	0	0	0	0	1	1	0	2
2	195169566	G	A	001000	001000	54	0	110	1	49	7	81	0	58	0	77	0	437	0	0	1	0	0	0	0	0	1	0	0	0	0	1
2	205561253	A	C	001000	001000	54	0	135	0	36	10	155	0	83	0	153	0	626	0	0	1	0	0	0	0	0	1	0	0	0	0	1
2	208491203	A	T	000011	000011	100	0	56	0	39	0	62	0	43	17	57	10	384	0	0	0	0	1	1	0	0	0	0	1	1	0	2
2	210801492	G	T	000011	000011	129	0	197	0	54	0	137	0	81	40	106	34	778	0	0	0	0	1	1	0	0	0	0	1	1	0	2
2	211054660	T	C	000011	000011	66	0	130	0	62	1	161	1	71	40	109	45	686	0	0	0	0	1	1	0	0	0	0	1	1	0	2
2	215784927	C	G	000100	000100	122	0	80	0	40	0	77	13	68	0	98	0	498	0	0	0	1	0	0	0	0	0	1	0	0	0	1
2	216784507	T	A	001000	101010	49	2	109	1	46	8	102	1	106	2	114	0	540	0	0	1	0	0	0	1	0	1	0	1	0	2	3
2	217151016	C	G	010000	010000	97	0	70	10	42	1	80	0	68	0	64	0	432	0	1	0	0	0	0	0	1	0	0	0	0	0	1
2	222247989	G	A	100011	110111	33	7	41	8	29	0	32	7	30	16	25	15	243	1	0	0	0	1	1	1	1	0	1	1	1	2	5
2	223992181	T	G	000011	000011	56	0	102	0	41	0	79	0	55	25	63	13	434	0	0	0	0	1	1	0	0	0	0	1	1	0	2
2	228041589	A	C	000011	000011	29	0	80	0	42	0	92	0	33	15	59	19	369	0	0	0	0	1	1	0	0	0	0	1	1	0	2
2	228060372	T	G	100001	110001	54	9	71	8	35	0	91	1	43	0	77	8	397	1	0	0	0	0	1	1	1	0	0	0	1	1	3
2	228656084	C	T	010000	010000	75	0	67	11	37	0	79	0	71	1	69	0	410	0	1	0	0	0	0	0	1	0	0	0	0	0	1
2	229459457	T	G	000001	000001	41	0	108	0	54	0	123	0	45	0	84	11	466	0	0	0	0	0	1	0	0	0	0	0	1	0	1
2	230011869	G	T	001000	011000	65	0	97	2	43	7	76	0	67	1	95	0	453	0	0	1	0	0	0	0	1	1	0	0	0	1	2
2	235349608	T	C	010010	111110	76	8	64	5	25	2	44	2	49	9	41	0	325	0	1	0	0	1	0	1	1	1	1	1	0	3	5
2	235530784	G	A	000011	000011	163	0	94	0	44	0	73	1	58	25	64	20	542	0	0	0	0	1	1	0	0	0	0	1	1	0	2
2	236843021	G	A	000001	000001	129	0	74	0	27	0	52	1	58	0	43	8	392	0	0	0	0	0	1	0	0	0	0	0	1	0	1
2	236909336	G	A	000010	000010	136	0	70	0	32	0	50	0	75	12	45	0	420	0	0	0	0	1	0	0	0	0	0	1	0	0	1
2	237946083	C	A	000011	000011	184	0	105	0	48	1	98	0	80	43	59	21	639	0	0	0	0	1	1	0	0	0	0	1	1	0	2
2	238560567	G	C	000010	110111	25	22	59	5	32	0	48	4	26	16	31	17	285	0	0	0	0	1	0	1	1	0	1	1	1	4	5
3	339120	T	G	100001	110111	14	10	89	21	49	1	63	5	47	9	73	21	402	1	0	0	0	0	1	1	1	0	1	1	1	3	5
3	1890727	T	A	001000	001000	100	0	147	0	39	6	114	0	83	0	102	0	591	0	0	1	0	0	0	0	0	1	0	0	0	0	1
3	2220842	G	A	010000	010000	74	0	104	19	54	0	112	0	77	1	95	0	536	0	1	0	0	0	0	0	1	0	0	0	0	0	1
3	2373927	C	T	010000	010000	81	0	100	13	45	0	94	0	66	1	75	0	475	0	1	0	0	0	0	0	1	0	0	0	0	0	1
3	4944554	G	A	011111	011111	28	0	37	4	16	5	40	8	22	4	39	9	212	0	1	1	1	1	1	0	1	1	1	1	1	0	5
3	5976617	T	A	000011	000011	169	0	154	0	76	1	136	0	106	51	95	28	816	0	0	0	0	1	1	0	0	0	0	1	1	0	2
3	8277478	C	T	000011	000011	69	0	169	0	47	0	103	0	69	27	76	27	587	0	0	0	0	1	1	0	0	0	0	1	1	0	2
3	8392827	G	A	010000	010000	128	0	139	20	49	1	109	1	112	0	118	0	677	0	1	0	0	0	0	0	1	0	0	0	0	0	1
3	8814056	G	C	000010	000010	124	0	119	0	55	0	93	0	110	15	92	0	608	0	0	0	0	1	0	0	0	0	0	1	0	0	1
3	10322919	T	C	000011	000011	85	0	110	0	46	0	72	0	65	31	61	29	499	0	0	0	0	1	1	0	0	0	0	1	1	0	2
3	11039814	C	T	000011	000011	79	0	73	1	32	0	61	1	40	20	34	12	353	0	0	0	0	1	1	0	0	0	0	1	1	0	2
3	11283239	G	T	000011	000011	116	0	80	1	41	0	75	0	75	27	61	24	500	0	0	0	0	1	1	0	0	0	0	1	1	0	2
3	12626799	A	G	000100	000100	113	0	110	1	34	0	75	12	108	0	101	0	554	0	0	0	1	0	0	0	0	0	1	0	0	0	1
3	17971350	G	A	000001	000001	69	0	116	0	64	0	128	1	76	0	85	11	550	0	0	0	0	0	1	0	0	0	0	0	1	0	1
3	18590649	G	A	010000	010000	63	0	102	21	50	1	114	0	66	0	122	0	539	0	1	0	0	0	0	0	1	0	0	0	0	0	1
3	21696369	C	G	000011	000011	84	0	164	0	46	0	118	0	84	28	109	30	663	0	0	0	0	1	1	0	0	0	0	1	1	0	2
3	24313484	C	A	000001	110111	21	4	59	5	40	0	56	8	45	4	52	18	312	0	0	0	0	0	1	1	1	0	1	1	1	4	5
3	25891500	C	T	000011	000011	119	0	127	0	60	0	96	1	69	34	95	42	643	0	0	0	0	1	1	0	0	0	0	1	1	0	2
3	26606146	G	A	000011	000011	22	0	101	0	72	0	108	1	24	8	63	20	419	0	0	0	0	1	1	0	0	0	0	1	1	0	2
3	26818540	G	A	000011	000011	67	0	128	0	63	0	97	0	51	30	92	43	571	0	0	0	0	1	1	0	0	0	0	1	1	0	2
3	26949628	A	C	001000	011000	31	0	122	4	54	7	99	0	71	0	104	0	492	0	0	1	0	0	0	0	1	1	0	0	0	1	2
3	29389435	T	G	010000	010000	65	0	125	14	56	0	121	0	90	0	108	0	579	0	1	0	0	0	0	0	1	0	0	0	0	0	1
3	30798500	G	C	000100	000100	108	0	130	0	45	0	91	13	105	0	106	0	598	0	0	0	1	0	0	0	0	0	1	0	0	0	1
3	31479618	G	A	001000	001000	61	0	136	0	45	8	135	0	100	0	141	0	626	0	0	1	0	0	0	0	0	1	0	0	0	0	1
3	33241220	A	G	000011	000011	63	0	85	0	48	0	75	0	54	27	58	25	435	0	0	0	0	1	1	0	0	0	0	1	1	0	2
3	34152996	G	C	000011	000011	107	0	101	0	38	0	75	0	40	34	76	27	498	0	0	0	0	1	1	0	0	0	0	1	1	0	2
3	35898189	C	T	000011	000011	56	0	92	0	48	0	102	0	57	20	65	20	460	0	0	0	0	1	1	0	0	0	0	1	1	0	2
3	36090041	G	T	000011	000011	91	0	101	0	50	0	73	0	35	17	50	10	427	0	0	0	0	1	1	0	0	0	0	1	1	0	2
3	36540762	A	G	000011	000011	31	0	129	0	43	0	120	0	39	10	94	20	486	0	0	0	0	1	1	0	0	0	0	1	1	0	2
3	38093037	C	T	000011	000011	117	0	94	0	33	0	78	0	51	26	50	22	471	0	0	0	0	1	1	0	0	0	0	1	1	0	2
3	43316530	T	C	010000	010000	95	0	98	14	47	0	105	0	96	0	77	0	532	0	1	0	0	0	0	0	1	0	0	0	0	0	1
3	44733617	T	C	000100	000100	61	0	106	0	61	0	102	16	61	0	109	0	516	0	0	0	1	0	0	0	0	0	1	0	0	0	1
3	47409087	T	C	000011	000011	134	0	113	1	49	0	85	0	90	40	73	19	604	0	0	0	0	1	1	0	0	0	0	1	1	0	2
3	49865562	G	T	000001	110111	91	4	63	5	37	0	67	2	49	3	58	13	392	0	0	0	0	0	1	1	1	0	1	1	1	4	5
3	49865571	T	C	000001	110111	86	4	61	5	37	0	65	3	43	4	53	13	374	0	0	0	0	0	1	1	1	0	1	1	1	4	5
3	55900422	C	A	000001	000101	47	0	123	0	44	0	119	2	101	0	74	11	521	0	0	0	0	0	1	0	0	0	1	0	1	1	2
3	58617089	A	G	010000	010000	148	0	82	13	40	0	51	0	103	1	70	0	508	0	1	0	0	0	0	0	1	0	0	0	0	0	1
3	59963273	C	T	010000	010000	85	0	118	18	53	0	120	0	123	0	129	0	646	0	1	0	0	0	0	0	1	0	0	0	0	0	1
3	61750333	G	A	010000	010000	114	0	108	14	43	0	92	1	116	0	96	0	584	0	1	0	0	0	0	0	1	0	0	0	0	0	1
3	62789698	C	T	000011	010011	99	0	109	2	67	0	81	0	81	24	81	23	567	0	0	0	0	1	1	0	1	0	0	1	1	1	3
3	65342337	G	A	000011	000011	81	0	40	0	27	0	25	0	24	17	26	7	247	0	0	0	0	1	1	0	0	0	0	1	1	0	2
3	66624391	C	T	000100	000100	84	0	111	0	47	0	74	12	100	0	107	0	535	0	0	0	1	0	0	0	0	0	1	0	0	0	1
3	68726998	T	A	000100	000100	34	0	106	0	55	0	92	12	37	1	90	0	427	0	0	0	1	0	0	0	0	0	1	0	0	0	1
3	72443286	G	A	000011	000011	58	0	140	1	50	0	122	0	75	17	82	24	569	0	0	0	0	1	1	0	0	0	0	1	1	0	2
3	73894631	T	G	010000	010000	110	0	102	17	68	0	137	1	115	0	132	0	682	0	1	0	0	0	0	0	1	0	0	0	0	0	1
3	74438876	C	T	010000	010000	100	0	115	17	43	0	105	0	105	0	97	0	582	0	1	0	0	0	0	0	1	0	0	0	0	0	1
3	76947426	T	C	000011	000011	22	0	110	0	51	0	125	0	36	13	59	23	439	0	0	0	0	1	1	0	0	0	0	1	1	0	2
3	77076541	G	A	000011	000011	102	0	119	1	67	1	103	0	69	27	70	34	593	0	0	0	0	1	1	0	0	0	0	1	1	0	2
3	77266687	G	A	000011	000011	88	1	112	0	49	0	96	0	69	24	70	21	530	0	0	0	0	1	1	0	0	0	0	1	1	0	2
3	78059942	T	C	000011	000011	27	0	106	0	58	0	124	1	36	11	54	26	443	0	0	0	0	1	1	0	0	0	0	1	1	0	2
3	81237825	T	C	000011	000011	45	0	120	0	66	0	130	0	54	26	80	34	555	0	0	0	0	1	1	0	0	0	0	1	1	0	2
3	83903323	G	T	000011	000011	85	1	132	0	49	0	155	0	89	26	93	37	667	0	0	0	0	1	1	0	0	0	0	1	1	0	2
3	84395955	G	A	000010	000010	97	0	144	0	58	0	119	0	80	11	114	0	623	0	0	0	0	1	0	0	0	0	0	1	0	0	1
3	85237809	G	T	010000	010000	52	0	71	19	36	0	85	0	44	0	71	0	378	0	1	0	0	0	0	0	1	0	0	0	0	0	1
3	85565424	G	A	000011	000111	32	0	142	0	56	1	127	2	67	24	108	27	586	0	0	0	0	1	1	0	0	0	1	1	1	1	3
3	86395513	T	G	100010	110111	22	13	52	21	47	0	45	10	25	19	46	19	319	1	0	0	0	1	0	1	1	0	1	1	1	3	5
3	86431078	C	A	000011	000011	48	0	89	0	56	0	88	0	48	16	72	27	444	0	0	0	0	1	1	0	0	0	0	1	1	0	2
3	86817426	G	T	000011	000011	136	0	137	0	53	0	88	0	69	25	77	25	610	0	0	0	0	1	1	0	0	0	0	1	1	0	2
3	87067809	G	A	000011	000011	88	1	139	0	70	0	96	0	61	22	78	30	585	0	0	0	0	1	1	0	0	0	0	1	1	0	2
3	89771283	C	T	000011	000011	41	0	38	1	26	0	26	0	19	9	35	10	205	0	0	0	0	1	1	0	0	0	0	1	1	0	2
3	94521142	A	T	001000	001000	33	0	114	1	45	7	103	0	65	0	91	1	460	0	0	1	0	0	0	0	0	1	0	0	0	0	1
3	96334662	C	A	000011	000011	66	0	122	0	62	0	104	0	60	25	72	20	531	0	0	0	0	1	1	0	0	0	0	1	1	0	2
3	96334663	C	A	000011	010011	68	0	118	3	61	0	103	0	61	26	73	17	530	0	0	0	0	1	1	0	1	0	0	1	1	1	3
3	97864155	C	A	010000	010000	84	1	98	17	63	0	122	0	88	0	81	0	554	0	1	0	0	0	0	0	1	0	0	0	0	0	1
3	98516208	A	G	001000	001000	27	0	93	0	58	9	103	0	61	0	85	0	436	0	0	1	0	0	0	0	0	1	0	0	0	0	1
3	99119968	G	T	000100	000100	20	0	120	1	41	0	116	13	66	0	109	0	486	0	0	0	1	0	0	0	0	0	1	0	0	0	1
3	99802030	T	A	000011	000011	63	0	128	1	55	1	102	0	60	21	103	32	566	0	0	0	0	1	1	0	0	0	0	1	1	0	2
3	101134148	C	G	001000	101111	103	5	142	1	69	8	112	2	115	5	150	5	717	0	0	1	0	0	0	1	0	1	1	1	1	4	5
3	102043770	T	C	000011	000011	102	0	150	0	68	0	122	0	62	44	88	46	682	0	0	0	0	1	1	0	0	0	0	1	1	0	2
3	103063949	T	A	000011	000011	40	0	119	0	48	0	109	0	43	18	63	27	467	0	0	0	0	1	1	0	0	0	0	1	1	0	2
3	103258554	C	A	001000	001000	45	0	102	0	42	11	117	0	71	0	94	0	482	0	0	1	0	0	0	0	0	1	0	0	0	0	1
3	104347220	G	A	001000	011000	50	0	112	10	27	7	112	1	101	0	125	0	545	0	0	1	0	0	0	0	1	1	0	0	0	1	2
3	105077626	C	T	000100	010100	64	1	50	2	29	0	43	10	58	0	57	0	314	0	0	0	1	0	0	0	1	0	1	0	0	1	2
3	107123245	A	G	000011	000011	53	0	141	1	51	0	155	0	55	18	66	25	565	0	0	0	0	1	1	0	0	0	0	1	1	0	2
3	108145665	G	A	000011	000011	124	0	95	0	50	0	94	0	61	31	53	15	523	0	0	0	0	1	1	0	0	0	0	1	1	0	2
3	108494365	G	T	000011	000011	73	0	100	1	56	0	98	0	58	19	69	21	495	0	0	0	0	1	1	0	0	0	0	1	1	0	2
3	109832751	C	A	000011	000011	100	0	203	0	59	1	132	0	84	35	111	35	760	0	0	0	0	1	1	0	0	0	0	1	1	0	2
3	111271169	G	T	000011	000011	97	0	115	0	53	0	88	0	54	29	88	24	548	0	0	0	0	1	1	0	0	0	0	1	1	0	2
3	112494066	C	T	001000	001000	176	0	132	0	33	7	79	1	144	0	99	0	671	0	0	1	0	0	0	0	0	1	0	0	0	0	1
3	113585706	C	T	100000	111100	54	6	73	2	33	2	79	2	48	1	68	1	369	1	0	0	0	0	0	1	1	1	1	0	0	3	4
3	114859991	G	A	000001	000001	104	0	177	0	79	0	174	0	139	0	160	21	854	0	0	0	0	0	1	0	0	0	0	0	1	0	1
3	116361620	C	A	000011	000011	79	0	117	0	59	0	111	0	58	31	79	24	558	0	0	0	0	1	1	0	0	0	0	1	1	0	2
3	116744705	C	A	010000	110000	130	2	97	13	51	1	68	0	113	0	87	1	563	0	1	0	0	0	0	1	1	0	0	0	0	1	2
3	117627490	G	A	000100	000100	91	0	161	1	58	0	110	15	71	1	120	0	628	0	0	0	1	0	0	0	0	0	1	0	0	0	1
3	118955381	G	A	000011	000011	50	0	138	0	50	0	126	0	55	20	112	21	572	0	0	0	0	1	1	0	0	0	0	1	1	0	2
3	120249452	C	A	000010	000010	138	0	129	1	61	0	100	0	79	14	107	1	630	0	0	0	0	1	0	0	0	0	0	1	0	0	1
3	124596037	G	T	000011	000011	58	0	59	0	45	0	85	0	44	21	64	14	390	0	0	0	0	1	1	0	0	0	0	1	1	0	2
3	128312221	T	A	000011	000011	36	0	82	0	34	0	62	0	21	8	39	15	297	0	0	0	0	1	1	0	0	0	0	1	1	0	2
3	132823460	G	C	000100	000100	71	0	128	0	56	0	69	16	110	0	96	1	547	0	0	0	1	0	0	0	0	0	1	0	0	0	1
3	134092724	A	G	000100	000100	57	0	41	0	26	0	38	8	63	0	40	0	273	0	0	0	1	0	0	0	0	0	1	0	0	0	1
3	134818192	T	A	001000	001010	66	0	79	0	17	9	64	1	41	3	42	1	323	0	0	1	0	0	0	0	0	1	0	1	0	1	2
3	134818194	G	A	001000	001010	68	0	81	1	17	8	61	1	43	2	42	1	325	0	0	1	0	0	0	0	0	1	0	1	0	1	2
3	134841996	G	T	000011	000011	75	1	103	0	61	0	78	0	58	18	46	20	460	0	0	0	0	1	1	0	0	0	0	1	1	0	2
3	137556520	G	C	000011	000011	130	0	106	0	50	0	108	0	72	29	67	21	583	0	0	0	0	1	1	0	0	0	0	1	1	0	2
3	140986701	G	C	000011	110111	49	5	47	5	34	0	44	2	43	11	48	7	295	0	0	0	0	1	1	1	1	0	1	1	1	3	5
3	142060909	T	G	000011	000111	55	0	142	0	60	0	114	2	64	27	74	22	560	0	0	0	0	1	1	0	0	0	1	1	1	1	3
3	148859318	G	T	010001	011111	48	1	30	7	28	3	51	5	35	4	48	12	272	0	1	0	0	0	1	0	1	1	1	1	1	3	5
3	150048244	G	T	000011	000011	50	0	119	0	51	0	82	1	94	43	79	43	562	0	0	0	0	1	1	0	0	0	0	1	1	0	2
3	150789302	G	T	000011	000011	37	0	87	1	39	0	112	0	30	22	58	14	400	0	0	0	0	1	1	0	0	0	0	1	1	0	2
3	154307249	G	A	000011	110111	41	10	70	17	53	0	67	10	43	20	59	12	402	0	0	0	0	1	1	1	1	0	1	1	1	3	5
3	154431704	G	C	000011	000011	107	0	111	0	57	0	95	0	89	29	76	27	591	0	0	0	0	1	1	0	0	0	0	1	1	0	2
3	157070892	C	T	000001	000001	74	0	85	0	40	0	79	0	61	0	64	9	412	0	0	0	0	0	1	0	0	0	0	0	1	0	1
3	160529859	C	T	000011	000011	93	0	121	0	45	0	97	0	66	36	80	21	559	0	0	0	0	1	1	0	0	0	0	1	1	0	2
3	161680047	C	T	000011	000011	83	0	136	0	55	0	107	0	57	30	69	25	562	0	0	0	0	1	1	0	0	0	0	1	1	0	2
3	163396506	T	C	001000	001000	43	0	131	0	47	8	144	0	78	0	124	0	575	0	0	1	0	0	0	0	0	1	0	0	0	0	1
3	163472916	G	T	000011	000011	56	0	116	0	53	0	110	0	57	30	65	25	512	0	0	0	0	1	1	0	0	0	0	1	1	0	2
3	165515565	A	T	000011	000011	42	0	122	0	38	0	107	0	50	27	82	22	490	0	0	0	0	1	1	0	0	0	0	1	1	0	2
3	169190463	G	A	000110	010111	29	0	55	7	31	0	36	5	37	4	46	3	253	0	0	0	1	1	0	0	1	0	1	1	1	2	4
3	170768853	C	T	000011	000011	49	0	97	0	65	0	105	0	39	22	71	35	483	0	0	0	0	1	1	0	0	0	0	1	1	0	2
3	171878291	A	T	000100	000100	81	0	122	0	55	0	113	13	129	0	139	0	652	0	0	0	1	0	0	0	0	0	1	0	0	0	1
3	176971077	T	C	000011	000011	72	0	100	0	49	0	89	1	72	34	73	32	522	0	0	0	0	1	1	0	0	0	0	1	1	0	2
3	178398589	G	T	000011	000011	74	0	101	0	51	0	113	1	32	18	65	24	479	0	0	0	0	1	1	0	0	0	0	1	1	0	2
3	181062921	T	C	000100	000100	82	0	130	0	69	0	87	12	80	0	121	0	581	0	0	0	1	0	0	0	0	0	1	0	0	0	1
3	181172764	C	T	001000	001000	85	0	109	0	40	7	93	0	115	0	112	0	561	0	0	1	0	0	0	0	0	1	0	0	0	0	1
3	183952988	C	T	000011	000011	88	0	45	0	30	0	40	0	30	8	19	9	269	0	0	0	0	1	1	0	0	0	0	1	1	0	2
3	184167698	A	C	000011	000011	80	1	82	0	43	0	73	0	35	18	40	12	384	0	0	0	0	1	1	0	0	0	0	1	1	0	2
3	184633441	A	G	000100	000100	84	1	81	0	49	0	92	12	77	0	95	0	491	0	0	0	1	0	0	0	0	0	1	0	0	0	1
3	184735623	C	T	000011	000011	93	0	100	0	40	1	89	0	50	24	64	21	482	0	0	0	0	1	1	0	0	0	0	1	1	0	2
3	191774141	T	A	000011	000011	42	0	119	0	48	0	105	1	53	22	72	24	486	0	0	0	0	1	1	0	0	0	0	1	1	0	2
3	192098940	C	A	000010	110111	60	9	53	15	53	0	36	8	41	12	45	7	339	0	0	0	0	1	0	1	1	0	1	1	1	4	5
3	193247965	C	T	000011	000011	54	0	142	0	58	0	111	0	59	24	76	35	559	0	0	0	0	1	1	0	0	0	0	1	1	0	2
3	196063301	G	A	000011	000011	96	0	78	1	39	0	61	0	57	25	59	24	440	0	0	0	0	1	1	0	0	0	0	1	1	0	2
4	700231	C	T	111000	111011	90	18	40	6	19	4	31	1	61	6	43	3	322	1	1	1	0	0	0	1	1	1	0	1	1	2	5
4	3002312	T	A	100111	110111	35	6	46	3	31	0	49	7	27	3	41	6	254	1	0	0	1	1	1	1	1	0	1	1	1	1	5
4	3035052	T	C	000011	000011	74	0	60	0	32	0	66	0	30	9	34	20	325	0	0	0	0	1	1	0	0	0	0	1	1	0	2
4	4856433	G	A	000011	000011	52	0	36	0	29	0	40	0	25	14	25	10	231	0	0	0	0	1	1	0	0	0	0	1	1	0	2
4	6484849	G	A	001000	001010	29	0	75	0	25	10	58	0	37	3	62	0	299	0	0	1	0	0	0	0	0	1	0	1	0	1	2
4	6571564	A	G	000001	000001	37	0	47	0	21	0	37	0	48	0	37	7	234	0	0	0	0	0	1	0	0	0	0	0	1	0	1
4	7678456	C	T	100010	100110	36	5	29	1	23	1	39	4	35	6	23	1	203	1	0	0	0	1	0	1	0	0	1	1	0	1	3
4	8653097	C	T	000011	000011	63	0	38	0	35	0	46	0	26	9	25	6	248	0	0	0	0	1	1	0	0	0	0	1	1	0	2
4	9421565	A	G	000011	000011	52	0	121	0	49	0	112	0	48	23	62	17	484	0	0	0	0	1	1	0	0	0	0	1	1	0	2
4	9954218	C	T	000011	000011	80	0	77	0	35	0	58	0	39	17	40	14	360	0	0	0	0	1	1	0	0	0	0	1	1	0	2
4	10268999	A	G	000010	000010	86	0	128	0	45	0	103	0	96	14	109	0	581	0	0	0	0	1	0	0	0	0	0	1	0	0	1
4	10782881	G	A	000100	000100	115	0	71	0	46	0	48	7	70	1	65	0	423	0	0	0	1	0	0	0	0	0	1	0	0	0	1
4	11839563	C	T	001000	001000	94	0	152	1	57	11	119	0	128	0	131	0	693	0	0	1	0	0	0	0	0	1	0	0	0	0	1
4	16828255	A	G	000011	000011	60	0	120	0	58	0	129	0	76	26	92	28	589	0	0	0	0	1	1	0	0	0	0	1	1	0	2
4	18306588	T	G	000011	000011	135	0	114	0	70	0	85	0	63	30	64	15	576	0	0	0	0	1	1	0	0	0	0	1	1	0	2
4	18756398	T	C	000011	000011	50	0	130	0	53	0	100	0	55	25	73	27	513	0	0	0	0	1	1	0	0	0	0	1	1	0	2
4	19425223	G	T	000011	000011	35	1	139	0	63	0	134	0	43	20	99	21	555	0	0	0	0	1	1	0	0	0	0	1	1	0	2
4	20857996	A	G	000011	000011	68	0	129	0	61	0	131	0	43	37	74	24	567	0	0	0	0	1	1	0	0	0	0	1	1	0	2
4	21252805	T	C	000100	000100	28	0	73	0	52	0	72	14	29	0	63	0	331	0	0	0	1	0	0	0	0	0	1	0	0	0	1
4	22904775	C	A	000011	000011	104	0	93	0	39	0	75	0	36	15	70	12	444	0	0	0	0	1	1	0	0	0	0	1	1	0	2
4	24453622	C	T	000011	000011	99	0	121	0	41	0	89	0	61	27	60	23	521	0	0	0	0	1	1	0	0	0	0	1	1	0	2
4	25544981	G	C	110111	110111	25	13	30	7	19	1	25	8	11	9	18	13	179	1	1	0	1	1	1	1	1	0	1	1	1	0	5
4	26696105	G	A	000011	100011	153	2	103	0	52	0	72	1	77	25	58	17	560	0	0	0	0	1	1	1	0	0	0	1	1	1	3
4	29039748	G	A	001000	001000	63	0	150	0	31	10	165	0	87	0	122	0	628	0	0	1	0	0	0	0	0	1	0	0	0	0	1
4	30441504	T	C	000011	100011	102	2	127	1	38	0	100	1	74	33	67	17	562	0	0	0	0	1	1	1	0	0	0	1	1	1	3
4	31505375	C	T	000100	000100	104	0	101	0	71	0	88	10	77	0	68	0	519	0	0	0	1	0	0	0	0	0	1	0	0	0	1
4	33518785	A	G	000100	000100	57	0	123	0	37	0	88	10	80	0	95	0	490	0	0	0	1	0	0	0	0	0	1	0	0	0	1
4	34131973	C	G	000011	000011	45	0	96	1	56	0	108	0	38	14	66	18	442	0	0	0	0	1	1	0	0	0	0	1	1	0	2
4	34601366	T	A	000011	000011	35	0	114	0	53	0	98	1	40	18	68	29	456	0	0	0	0	1	1	0	0	0	0	1	1	0	2
4	35405118	G	C	000010	000011	36	0	132	0	49	0	131	0	47	9	96	3	503	0	0	0	0	1	0	0	0	0	0	1	1	1	2
4	38108473	C	T	000011	000011	117	0	59	0	45	1	50	0	33	24	47	20	396	0	0	0	0	1	1	0	0	0	0	1	1	0	2
4	39630371	G	T	000100	110111	46	5	45	5	28	0	45	8	28	5	35	6	256	0	0	0	1	0	0	1	1	0	1	1	1	4	5
4	42306841	C	T	000010	000010	29	0	65	0	35	0	78	0	30	7	61	1	306	0	0	0	0	1	0	0	0	0	0	1	0	0	1
4	44711454	T	C	000100	000100	89	0	182	0	76	0	119	16	113	0	163	0	758	0	0	0	1	0	0	0	0	0	1	0	0	0	1
4	54246489	T	G	000001	010001	133	0	158	2	71	0	151	0	163	0	132	15	825	0	0	0	0	0	1	0	1	0	0	0	1	1	2
4	54462926	G	T	000011	000011	59	0	107	1	60	0	101	0	66	35	70	32	531	0	0	0	0	1	1	0	0	0	0	1	1	0	2
4	55351028	A	G	000011	000011	94	0	130	0	36	0	96	0	101	62	81	32	632	0	0	0	0	1	1	0	0	0	0	1	1	0	2
4	56655326	C	T	000100	000100	107	1	90	0	53	0	72	9	83	0	102	1	518	0	0	0	1	0	0	0	0	0	1	0	0	0	1
4	57535256	G	A	000011	000011	88	1	132	0	64	0	126	1	86	31	81	33	643	0	0	0	0	1	1	0	0	0	0	1	1	0	2
4	57977159	C	T	000011	000011	101	0	81	0	57	0	74	0	79	7	76	15	490	0	0	0	0	1	1	0	0	0	0	1	1	0	2
4	62120625	G	A	000011	010011	77	0	138	2	60	0	125	0	59	28	97	33	619	0	0	0	0	1	1	0	1	0	0	1	1	1	3
4	63673003	G	A	000011	000011	156	0	89	0	27	0	47	0	60	24	41	13	457	0	0	0	0	1	1	0	0	0	0	1	1	0	2
4	64799526	T	A	000011	000011	34	0	134	1	63	0	124	0	52	21	83	17	529	0	0	0	0	1	1	0	0	0	0	1	1	0	2
4	66235789	C	G	001000	001000	125	0	148	0	59	12	127	0	91	0	125	0	687	0	0	1	0	0	0	0	0	1	0	0	0	0	1
4	66929336	T	C	000011	000011	36	0	137	0	62	0	137	0	58	17	92	38	577	0	0	0	0	1	1	0	0	0	0	1	1	0	2
4	67853124	C	T	000010	000010	81	0	98	0	51	0	95	0	94	13	85	0	517	0	0	0	0	1	0	0	0	0	0	1	0	0	1
4	68761961	T	C	000001	110011	165	14	118	4	52	1	91	1	91	7	83	11	638	0	0	0	0	0	1	1	1	0	0	1	1	3	4
4	71433099	A	C	001000	011000	121	0	123	2	53	12	106	1	123	0	107	1	649	0	0	1	0	0	0	0	1	1	0	0	0	1	2
4	71510286	G	T	000100	000100	144	0	122	0	41	0	82	12	145	0	100	0	646	0	0	0	1	0	0	0	0	0	1	0	0	0	1
4	73852184	G	A	000011	000011	40	0	117	0	49	0	131	0	45	15	72	29	498	0	0	0	0	1	1	0	0	0	0	1	1	0	2
4	74817297	T	C	000011	000011	53	0	103	0	35	0	85	0	52	23	50	15	416	0	0	0	0	1	1	0	0	0	0	1	1	0	2
4	78616814	G	A	000100	000100	45	0	138	0	49	0	121	16	63	0	114	0	546	0	0	0	1	0	0	0	0	0	1	0	0	0	1
4	80404794	C	T	000010	000010	77	0	115	0	44	0	105	0	60	9	103	0	513	0	0	0	0	1	0	0	0	0	0	1	0	0	1
4	81633514	A	C	001000	001000	120	0	213	0	67	13	141	0	132	0	138	0	824	0	0	1	0	0	0	0	0	1	0	0	0	0	1
4	85007791	T	A	001000	011000	50	0	165	2	48	11	121	1	102	0	139	0	639	0	0	1	0	0	0	0	1	1	0	0	0	1	2
4	85043965	G	T	000011	100011	71	2	132	0	60	0	117	0	76	21	80	32	591	0	0	0	0	1	1	1	0	0	0	1	1	1	3
4	86539891	A	G	010000	010000	85	0	125	16	65	0	149	0	126	0	155	0	721	0	1	0	0	0	0	0	1	0	0	0	0	0	1
4	87446719	C	T	001000	001000	56	0	105	0	47	10	124	0	83	0	86	0	511	0	0	1	0	0	0	0	0	1	0	0	0	0	1
4	88181036	A	G	000110	110111	77	5	94	8	40	1	71	8	64	10	90	5	473	0	0	0	1	1	0	1	1	0	1	1	1	3	5
4	88427964	T	C	001010	011111	74	1	116	3	28	5	105	7	62	8	95	7	511	0	0	1	0	1	0	0	1	1	1	1	1	3	5
4	88549726	A	G	010010	010111	20	0	20	6	22	1	31	4	20	8	25	2	159	0	1	0	0	1	0	0	1	0	1	1	1	2	4
4	88642074	T	C	101000	111000	27	3	48	3	23	6	52	1	39	0	43	1	246	1	0	1	0	0	0	1	1	1	0	0	0	1	3
4	89891057	C	A	000011	000011	112	0	147	0	64	1	118	0	68	30	73	35	648	0	0	0	0	1	1	0	0	0	0	1	1	0	2
4	90744028	C	A	010000	010000	53	0	94	10	42	0	80	0	53	0	87	0	419	0	1	0	0	0	0	0	1	0	0	0	0	0	1
4	93748010	G	T	000100	000100	64	0	142	0	38	0	105	17	86	0	147	0	599	0	0	0	1	0	0	0	0	0	1	0	0	0	1
4	96250334	G	A	000011	000011	118	0	114	1	51	0	93	0	61	41	70	23	572	0	0	0	0	1	1	0	0	0	0	1	1	0	2
4	97003728	C	A	000011	000011	94	0	139	0	59	0	154	0	76	49	93	25	689	0	0	0	0	1	1	0	0	0	0	1	1	0	2
4	102222025	A	C	000011	000011	93	0	137	0	79	1	137	0	60	23	114	42	686	0	0	0	0	1	1	0	0	0	0	1	1	0	2
4	104529472	G	A	000100	000100	125	0	136	1	74	0	104	14	98	0	124	0	676	0	0	0	1	0	0	0	0	0	1	0	0	0	1
4	106251027	C	A	100000	101000	73	11	121	0	55	2	92	0	106	0	89	0	549	1	0	0	0	0	0	1	0	1	0	0	0	1	2
4	106560993	T	C	001000	001000	25	0	134	1	35	8	112	0	65	0	104	0	484	0	0	1	0	0	0	0	0	1	0	0	0	0	1
4	106779764	G	A	000011	000011	124	0	106	0	54	0	63	0	84	37	71	32	571	0	0	0	0	1	1	0	0	0	0	1	1	0	2
4	110601167	A	G	000011	000011	135	1	93	0	37	0	94	0	75	37	69	24	565	0	0	0	0	1	1	0	0	0	0	1	1	0	2
4	110670683	C	G	000100	000100	96	0	117	1	46	0	107	14	125	0	111	0	617	0	0	0	1	0	0	0	0	0	1	0	0	0	1
4	113161195	G	T	000011	000011	106	0	158	1	65	0	132	0	99	59	127	41	788	0	0	0	0	1	1	0	0	0	0	1	1	0	2
4	118756276	C	T	000011	000011	95	0	92	0	54	0	77	0	48	29	40	24	459	0	0	0	0	1	1	0	0	0	0	1	1	0	2
4	120179015	A	G	000011	000011	31	0	151	0	55	0	136	0	59	25	121	43	621	0	0	0	0	1	1	0	0	0	0	1	1	0	2
4	120312412	T	A	100111	110111	33	13	34	6	19	1	22	9	21	8	30	10	206	1	0	0	1	1	1	1	1	0	1	1	1	1	5
4	123349637	C	G	000011	000011	49	0	101	0	57	0	104	0	33	18	57	25	444	0	0	0	0	1	1	0	0	0	0	1	1	0	2
4	123765765	C	T	011000	011111	35	0	97	9	26	6	107	2	86	2	83	5	458	0	1	1	0	0	0	0	1	1	1	1	1	3	5
4	123821114	C	A	010011	110111	59	29	39	22	21	0	41	7	30	22	20	23	313	0	1	0	0	1	1	1	1	0	1	1	1	2	5
4	124870083	G	A	000100	000100	24	0	127	0	52	0	103	12	66	0	99	0	483	0	0	0	1	0	0	0	0	0	1	0	0	0	1
4	125812470	T	C	000011	000011	39	0	120	0	60	0	112	0	52	25	94	39	541	0	0	0	0	1	1	0	0	0	0	1	1	0	2
4	126299217	G	C	000001	010001	65	0	147	2	70	0	172	0	95	0	134	14	699	0	0	0	0	0	1	0	1	0	0	0	1	1	2
4	127582911	A	T	000011	000011	84	0	154	0	54	0	123	0	74	30	99	27	645	0	0	0	0	1	1	0	0	0	0	1	1	0	2
4	131343076	A	G	000100	000100	45	0	132	0	42	0	134	19	79	0	82	0	533	0	0	0	1	0	0	0	0	0	1	0	0	0	1
4	131970141	G	A	000100	000100	73	0	139	0	57	0	110	13	69	0	125	1	587	0	0	0	1	0	0	0	0	0	1	0	0	0	1
4	135610970	C	T	000001	000001	63	0	144	1	58	0	136	0	108	0	115	13	638	0	0	0	0	0	1	0	0	0	0	0	1	0	1
4	135898813	A	G	001000	001000	65	0	139	0	45	8	115	0	75	0	101	0	548	0	0	1	0	0	0	0	0	1	0	0	0	0	1
4	135911723	G	A	000011	000011	31	0	146	0	68	0	138	0	54	25	94	24	580	0	0	0	0	1	1	0	0	0	0	1	1	0	2
4	138490333	T	C	010000	010000	58	0	111	17	63	0	95	0	74	0	105	0	523	0	1	0	0	0	0	0	1	0	0	0	0	0	1
4	149863717	T	C	010000	010000	62	0	95	18	53	0	79	0	51	1	74	0	433	0	1	0	0	0	0	0	1	0	0	0	0	0	1
4	152866266	C	G	001000	011000	73	0	110	2	53	8	118	0	68	0	99	0	531	0	0	1	0	0	0	0	1	1	0	0	0	1	2
4	153733247	A	G	010000	010000	154	0	138	20	68	0	123	0	124	0	123	0	750	0	1	0	0	0	0	0	1	0	0	0	0	0	1
4	154770634	G	A	000010	000010	90	1	111	1	55	0	86	1	65	12	59	1	482	0	0	0	0	1	0	0	0	0	0	1	0	0	1
4	155065601	G	A	000011	000011	50	0	91	0	52	0	82	0	50	7	70	7	409	0	0	0	0	1	1	0	0	0	0	1	1	0	2
4	163669190	C	A	100000	110111	17	9	69	9	51	1	71	8	40	6	45	8	334	1	0	0	0	0	0	1	1	0	1	1	1	4	5
4	166575394	T	C	000011	000011	66	0	109	0	57	0	113	1	45	29	81	34	535	0	0	0	0	1	1	0	0	0	0	1	1	0	2
4	169607037	C	G	000011	000011	25	0	96	0	39	0	109	0	45	20	77	25	436	0	0	0	0	1	1	0	0	0	0	1	1	0	2
4	170680676	A	C	001100	111101	31	2	52	9	30	8	45	11	42	1	47	2	280	0	0	1	1	0	0	1	1	1	1	0	1	3	5
4	173756728	C	G	000011	000011	85	0	126	0	48	0	103	1	81	11	94	10	559	0	0	0	0	1	1	0	0	0	0	1	1	0	2
4	175632801	G	A	000001	010111	33	1	36	4	36	0	39	7	22	4	17	9	208	0	0	0	0	0	1	0	1	0	1	1	1	3	4
4	176308745	G	A	000011	000011	144	0	79	0	43	0	58	0	75	31	45	17	492	0	0	0	0	1	1	0	0	0	0	1	1	0	2
4	177281368	G	A	010000	010000	65	0	146	18	60	0	104	0	97	0	125	0	615	0	1	0	0	0	0	0	1	0	0	0	0	0	1
4	178900844	G	A	010000	010000	192	0	147	21	57	0	92	0	134	0	107	0	750	0	1	0	0	0	0	0	1	0	0	0	0	0	1
4	179597906	C	T	000010	000010	56	0	124	0	56	0	133	0	61	10	112	0	552	0	0	0	0	1	0	0	0	0	0	1	0	0	1
4	180256973	G	T	010001	110111	31	2	31	7	22	1	32	5	25	3	33	5	197	0	1	0	0	0	1	1	1	0	1	1	1	3	5
4	181027876	G	A	000011	000011	65	0	145	0	55	0	119	1	76	22	81	24	588	0	0	0	0	1	1	0	0	0	0	1	1	0	2
4	181634950	G	A	000100	000100	62	0	139	0	67	0	103	11	69	0	96	0	547	0	0	0	1	0	0	0	0	0	1	0	0	0	1
4	182360244	G	T	000010	000010	74	0	75	0	33	0	65	1	39	7	50	0	344	0	0	0	0	1	0	0	0	0	0	1	0	0	1
4	182953267	A	G	000011	000011	86	0	109	1	62	0	87	0	57	39	63	29	533	0	0	0	0	1	1	0	0	0	0	1	1	0	2
4	183204881	C	A	000011	000011	55	0	93	0	45	0	97	0	44	21	65	19	439	0	0	0	0	1	1	0	0	0	0	1	1	0	2
4	183267630	G	A	000010	000010	69	0	91	0	46	0	77	0	56	10	88	0	437	0	0	0	0	1	0	0	0	0	0	1	0	0	1
4	183293557	A	G	000011	000011	33	0	72	1	37	0	90	0	18	23	53	23	350	0	0	0	0	1	1	0	0	0	0	1	1	0	2
4	183323228	G	A	000011	000011	83	0	99	0	43	0	98	0	47	21	84	17	492	0	0	0	0	1	1	0	0	0	0	1	1	0	2
4	184154291	C	T	001110	011111	19	1	51	12	22	4	41	14	22	11	47	11	255	0	0	1	1	1	0	0	1	1	1	1	1	2	5
4	184281180	T	C	111000	111110	94	17	47	13	18	13	51	5	77	4	56	1	396	1	1	1	0	0	0	1	1	1	1	1	0	2	5
4	186904681	A	C	000101	000111	21	1	81	1	32	0	70	7	39	2	49	9	312	0	0	0	1	0	1	0	0	0	1	1	1	1	3
4	190286787	C	A	001000	001000	99	0	87	0	44	7	73	0	95	1	88	0	494	0	0	1	0	0	0	0	0	1	0	0	0	0	1
4	190831103	G	A	001001	011111	20	0	88	9	40	5	100	3	44	2	71	11	393	0	0	1	0	0	1	0	1	1	1	1	1	3	5
4	190831113	A	G	001001	011111	20	0	88	10	42	6	95	3	44	2	72	11	393	0	0	1	0	0	1	0	1	1	1	1	1	3	5
5	1130235	C	T	010000	010000	72	0	50	7	30	0	71	0	62	0	72	0	364	0	1	0	0	0	0	0	1	0	0	0	0	0	1
5	1623989	T	C	001000	101000	83	10	40	1	26	9	32	1	42	1	38	1	284	0	0	1	0	0	0	1	0	1	0	0	0	1	2
5	1755565	T	C	000011	000011	106	0	73	0	35	0	57	1	40	16	44	11	383	0	0	0	0	1	1	0	0	0	0	1	1	0	2
5	2901393	C	T	000001	000001	94	0	58	0	30	0	38	0	75	0	38	7	340	0	0	0	0	0	1	0	0	0	0	0	1	0	1
5	4048213	A	G	000011	000011	24	0	109	0	61	0	101	0	30	23	46	30	424	0	0	0	0	1	1	0	0	0	0	1	1	0	2
5	5018898	T	A	000011	000011	174	0	101	0	47	0	85	0	60	26	63	21	577	0	0	0	0	1	1	0	0	0	0	1	1	0	2
5	8058355	G	A	000011	100011	104	3	102	0	35	0	62	0	62	15	56	14	453	0	0	0	0	1	1	1	0	0	0	1	1	1	3
5	9764995	A	G	000011	000011	67	1	113	0	47	1	121	1	50	17	58	19	495	0	0	0	0	1	1	0	0	0	0	1	1	0	2
5	10234690	C	A	000010	110111	30	5	62	13	52	0	65	7	39	12	48	14	347	0	0	0	0	1	0	1	1	0	1	1	1	4	5
5	10806451	G	A	000011	000011	77	0	117	0	60	0	111	1	53	33	78	22	552	0	0	0	0	1	1	0	0	0	0	1	1	0	2
5	11283503	A	G	001000	001000	82	0	94	0	35	10	76	0	82	0	83	0	462	0	0	1	0	0	0	0	0	1	0	0	0	0	1
5	11628622	G	A	000011	000011	97	0	118	0	49	0	97	0	35	28	52	29	505	0	0	0	0	1	1	0	0	0	0	1	1	0	2
5	11875949	G	C	000010	000010	86	0	141	1	51	0	108	1	109	13	125	0	635	0	0	0	0	1	0	0	0	0	0	1	0	0	1
5	12092268	C	G	000100	000100	58	0	126	0	46	0	89	10	101	0	85	0	515	0	0	0	1	0	0	0	0	0	1	0	0	0	1
5	14278756	C	T	000011	000011	50	0	138	0	51	0	108	0	55	24	95	46	567	0	0	0	0	1	1	0	0	0	0	1	1	0	2
5	15593543	G	A	000011	000011	88	0	70	0	50	0	61	0	49	22	51	27	418	0	0	0	0	1	1	0	0	0	0	1	1	0	2
5	17516125	A	G	100010	101111	51	9	50	0	33	2	65	3	36	5	55	2	311	1	0	0	0	1	0	1	0	1	1	1	1	3	5
5	21725696	C	G	000011	000011	138	0	178	0	61	0	113	0	70	27	84	29	700	0	0	0	0	1	1	0	0	0	0	1	1	0	2
5	24045445	C	A	000001	000001	43	0	150	0	56	0	113	1	88	1	111	23	586	0	0	0	0	0	1	0	0	0	0	0	1	0	1
5	27189811	A	G	000100	000100	50	0	136	0	51	0	108	17	73	0	102	0	537	0	0	0	1	0	0	0	0	0	1	0	0	0	1
5	27320125	C	T	000010	000011	54	0	124	1	48	0	106	0	62	8	104	4	511	0	0	0	0	1	0	0	0	0	0	1	1	1	2
5	28283813	G	T	000011	000111	40	0	121	0	51	0	112	2	50	25	74	29	504	0	0	0	0	1	1	0	0	0	1	1	1	1	3
5	29838317	G	A	000011	000011	78	0	152	0	60	0	135	0	85	27	85	20	642	0	0	0	0	1	1	0	0	0	0	1	1	0	2
5	30076739	T	C	001000	001000	66	0	144	0	58	11	109	0	108	0	121	0	617	0	0	1	0	0	0	0	0	1	0	0	0	0	1
5	30628493	G	A	001000	001000	79	0	154	1	50	7	128	0	112	0	126	0	657	0	0	1	0	0	0	0	0	1	0	0	0	0	1
5	33232535	A	G	000011	000011	66	0	165	0	59	0	111	0	70	24	98	24	617	0	0	0	0	1	1	0	0	0	0	1	1	0	2
5	35050355	G	A	010000	010000	78	0	105	12	50	0	93	0	81	0	101	0	520	0	1	0	0	0	0	0	1	0	0	0	0	0	1
5	35911343	A	G	000011	000011	52	0	112	0	50	0	121	0	54	24	68	26	507	0	0	0	0	1	1	0	0	0	0	1	1	0	2
5	39762013	G	A	000011	000011	126	1	111	0	54	0	115	1	74	27	91	30	630	0	0	0	0	1	1	0	0	0	0	1	1	0	2
5	41669737	G	C	000010	000010	125	0	123	0	47	0	97	0	108	17	94	0	611	0	0	0	0	1	0	0	0	0	0	1	0	0	1
5	43333700	A	T	000100	000100	52	0	80	0	39	0	57	9	74	0	55	0	366	0	0	0	1	0	0	0	0	0	1	0	0	0	1
5	45275757	G	T	001000	001000	57	0	118	1	38	11	128	0	79	0	130	0	562	0	0	1	0	0	0	0	0	1	0	0	0	0	1
5	45275759	A	T	001000	001000	56	0	122	1	37	11	126	0	76	0	131	0	560	0	0	1	0	0	0	0	0	1	0	0	0	0	1
5	45733049	A	C	100001	110111	36	9	51	14	36	1	68	20	38	11	51	12	347	1	0	0	0	0	1	1	1	0	1	1	1	3	5
5	51581741	G	A	000011	000011	118	1	130	0	72	0	122	0	78	30	87	29	667	0	0	0	0	1	1	0	0	0	0	1	1	0	2
5	55440299	G	A	000100	000100	115	0	105	0	39	0	75	11	153	0	93	0	591	0	0	0	1	0	0	0	0	0	1	0	0	0	1
5	56642272	G	A	000011	000011	70	0	142	0	57	0	119	0	67	23	84	37	599	0	0	0	0	1	1	0	0	0	0	1	1	0	2
5	56752320	G	T	000011	000011	124	0	185	0	67	0	125	0	130	47	95	28	801	0	0	0	0	1	1	0	0	0	0	1	1	0	2
5	57332630	G	T	100001	110111	20	5	37	4	33	0	50	6	26	3	38	9	231	1	0	0	0	0	1	1	1	0	1	1	1	3	5
5	60199726	T	C	000011	000011	33	0	149	0	59	0	156	0	37	22	87	38	581	0	0	0	0	1	1	0	0	0	0	1	1	0	2
5	61508046	C	G	000011	000011	68	0	143	0	49	0	121	0	66	25	86	28	586	0	0	0	0	1	1	0	0	0	0	1	1	0	2
5	62673781	A	G	000011	000011	82	0	118	0	61	0	123	1	68	24	87	29	593	0	0	0	0	1	1	0	0	0	0	1	1	0	2
5	65182279	G	C	010000	010000	125	0	103	14	55	0	119	0	111	0	96	0	623	0	1	0	0	0	0	0	1	0	0	0	0	0	1
5	65308801	A	G	000011	000011	62	0	144	0	59	0	129	0	60	24	112	40	630	0	0	0	0	1	1	0	0	0	0	1	1	0	2
5	65950266	G	A	000100	000100	73	0	98	0	50	0	85	14	76	0	97	0	493	0	0	0	1	0	0	0	0	0	1	0	0	0	1
5	66411126	A	C	000011	000011	64	0	108	0	56	0	77	0	54	27	64	16	466	0	0	0	0	1	1	0	0	0	0	1	1	0	2
5	71059776	C	T	000011	000011	24	0	112	1	35	0	105	0	29	13	72	24	415	0	0	0	0	1	1	0	0	0	0	1	1	0	2
5	76661699	A	T	000011	000011	117	0	73	0	38	0	78	1	63	16	53	16	455	0	0	0	0	1	1	0	0	0	0	1	1	0	2
5	76810109	C	T	000011	000011	76	0	183	0	63	0	114	1	88	32	98	33	688	0	0	0	0	1	1	0	0	0	0	1	1	0	2
5	78641162	A	G	000011	000011	80	0	107	0	52	0	91	0	55	29	64	32	510	0	0	0	0	1	1	0	0	0	0	1	1	0	2
5	78800624	C	A	000100	000101	75	0	100	0	47	0	88	15	75	0	118	2	520	0	0	0	1	0	0	0	0	0	1	0	1	1	2
5	81054047	C	A	000011	000011	206	1	162	1	69	0	135	0	100	40	145	48	907	0	0	0	0	1	1	0	0	0	0	1	1	0	2
5	81189197	T	C	000011	000011	43	0	106	1	56	0	138	0	55	19	64	34	516	0	0	0	0	1	1	0	0	0	0	1	1	0	2
5	81737999	T	G	000001	000001	82	0	138	0	55	0	124	0	96	0	94	11	600	0	0	0	0	0	1	0	0	0	0	0	1	0	1
5	82386491	C	T	010000	010000	56	0	61	12	35	0	80	0	51	0	75	0	370	0	1	0	0	0	0	0	1	0	0	0	0	0	1
5	84140997	C	G	000001	000011	62	0	136	0	64	0	111	0	63	5	86	17	544	0	0	0	0	0	1	0	0	0	0	1	1	1	2
5	85568782	C	G	000011	000011	200	0	73	0	50	0	52	0	42	21	35	13	486	0	0	0	0	1	1	0	0	0	0	1	1	0	2
5	86477496	A	G	000011	000011	174	0	142	0	52	0	111	0	70	22	90	35	696	0	0	0	0	1	1	0	0	0	0	1	1	0	2
5	86857094	C	T	000011	000011	25	0	130	0	56	0	104	0	28	15	74	28	460	0	0	0	0	1	1	0	0	0	0	1	1	0	2
5	87376472	C	G	001000	001000	45	0	87	0	35	9	85	0	62	0	88	0	411	0	0	1	0	0	0	0	0	1	0	0	0	0	1
5	87969961	C	T	100110	110111	43	6	38	4	25	1	28	4	32	5	49	2	237	1	0	0	1	1	0	1	1	0	1	1	1	2	5
5	89348416	A	G	000011	000011	48	0	136	1	52	0	113	0	56	23	87	34	550	0	0	0	0	1	1	0	0	0	0	1	1	0	2
5	91232074	G	T	010000	010000	52	0	144	19	74	0	125	0	114	0	150	0	678	0	1	0	0	0	0	0	1	0	0	0	0	0	1
5	92611192	C	T	000011	010011	47	0	116	3	39	0	106	0	42	15	70	26	464	0	0	0	0	1	1	0	1	0	0	1	1	1	3
5	93523140	G	T	001001	011011	22	1	34	4	14	7	31	1	24	3	29	6	176	0	0	1	0	0	1	0	1	1	0	1	1	2	4
5	93943410	A	C	000001	000001	106	0	131	0	72	0	129	0	93	0	115	14	660	0	0	0	0	0	1	0	0	0	0	0	1	0	1
5	94270981	G	T	000011	000011	53	0	137	0	63	0	113	0	55	21	94	30	566	0	0	0	0	1	1	0	0	0	0	1	1	0	2
5	100736799	A	G	001000	011000	122	0	160	2	59	10	156	0	150	0	146	0	805	0	0	1	0	0	0	0	1	1	0	0	0	1	2
5	103179500	G	A	000011	000011	65	0	76	0	55	0	87	0	42	13	54	20	412	0	0	0	0	1	1	0	0	0	0	1	1	0	2
5	104345361	C	T	000011	000011	79	0	148	1	73	0	164	0	60	22	72	35	654	0	0	0	0	1	1	0	0	0	0	1	1	0	2
5	104928690	A	G	001000	001000	39	0	90	0	34	7	89	0	50	0	73	0	382	0	0	1	0	0	0	0	0	1	0	0	0	0	1
5	107749366	G	A	000011	000011	81	0	92	0	44	0	78	0	36	15	51	14	411	0	0	0	0	1	1	0	0	0	0	1	1	0	2
5	110127269	C	A	000011	110111	47	4	73	9	49	0	57	9	57	18	56	13	392	0	0	0	0	1	1	1	1	0	1	1	1	3	5
5	113034336	A	G	000011	000011	85	0	114	0	54	0	93	0	67	29	78	18	538	0	0	0	0	1	1	0	0	0	0	1	1	0	2
5	113597069	C	G	001000	011000	117	0	101	2	37	9	79	0	95	0	101	0	541	0	0	1	0	0	0	0	1	1	0	0	0	1	2
5	113644076	A	C	000011	000011	134	1	144	0	67	0	118	0	96	37	74	31	702	0	0	0	0	1	1	0	0	0	0	1	1	0	2
5	115411750	C	A	000011	000011	61	0	117	1	57	0	108	0	45	22	76	21	508	0	0	0	0	1	1	0	0	0	0	1	1	0	2
5	115775777	C	A	000010	000011	85	0	93	0	43	0	85	1	101	14	79	4	505	0	0	0	0	1	0	0	0	0	0	1	1	1	2
5	116786538	C	T	110111	110111	17	7	56	14	25	1	38	9	39	14	42	15	277	1	1	0	1	1	1	1	1	0	1	1	1	0	5
5	116848398	T	A	000100	000100	30	0	110	0	44	0	98	13	57	0	93	0	445	0	0	0	1	0	0	0	0	0	1	0	0	0	1
5	118361973	T	C	000001	000001	113	1	114	0	65	0	127	0	127	0	104	12	663	0	0	0	0	0	1	0	0	0	0	0	1	0	1
5	118461751	C	T	000011	000011	101	0	102	0	66	0	93	1	53	15	69	16	516	0	0	0	0	1	1	0	0	0	0	1	1	0	2
5	119503582	C	T	000001	110111	59	5	74	10	72	0	58	7	55	14	67	20	441	0	0	0	0	0	1	1	1	0	1	1	1	4	5
5	121139798	C	G	000011	000011	81	0	119	0	65	0	107	0	51	25	71	32	551	0	0	0	0	1	1	0	0	0	0	1	1	0	2
5	123479688	C	G	010000	010000	31	0	104	18	49	0	99	0	69	1	99	0	470	0	1	0	0	0	0	0	1	0	0	0	0	0	1
5	123494672	T	C	000100	000100	115	0	147	0	64	1	124	14	137	0	155	0	757	0	0	0	1	0	0	0	0	0	1	0	0	0	1
5	124986221	G	C	000100	000100	35	0	111	0	57	0	96	11	51	0	70	0	431	0	0	0	1	0	0	0	0	0	1	0	0	0	1
5	128600197	G	C	000011	000011	129	0	142	0	66	0	119	0	87	41	81	33	698	0	0	0	0	1	1	0	0	0	0	1	1	0	2
5	130866916	T	C	000011	000011	130	0	170	1	64	0	147	0	90	34	129	48	813	0	0	0	0	1	1	0	0	0	0	1	1	0	2
5	133846410	T	G	000011	000011	110	0	100	0	48	0	106	1	92	44	80	32	613	0	0	0	0	1	1	0	0	0	0	1	1	0	2
5	133924528	C	A	000001	000001	143	0	92	1	48	0	102	0	108	1	76	15	586	0	0	0	0	0	1	0	0	0	0	0	1	0	1
5	134159525	A	T	000011	000011	100	0	162	0	58	0	149	0	106	45	106	30	756	0	0	0	0	1	1	0	0	0	0	1	1	0	2
5	140426662	T	C	000011	000011	56	0	123	0	45	0	108	0	62	22	76	25	517	0	0	0	0	1	1	0	0	0	0	1	1	0	2
5	141673977	G	A	000011	000011	92	0	75	0	39	0	58	0	41	28	47	22	402	0	0	0	0	1	1	0	0	0	0	1	1	0	2
5	142775391	C	A	000011	000011	79	0	151	0	64	0	132	0	76	26	143	33	704	0	0	0	0	1	1	0	0	0	0	1	1	0	2
5	148977945	T	C	010110	110111	49	4	81	16	36	0	51	18	64	16	73	10	418	0	1	0	1	1	0	1	1	0	1	1	1	2	5
5	151292513	G	A	000010	000010	83	0	137	0	47	0	80	0	105	14	85	0	551	0	0	0	0	1	0	0	0	0	0	1	0	0	1
5	152028775	C	A	000011	000011	80	0	134	1	61	0	101	0	70	24	82	25	578	0	0	0	0	1	1	0	0	0	0	1	1	0	2
5	154272311	C	T	000011	000011	160	1	144	0	52	0	99	0	87	35	74	19	671	0	0	0	0	1	1	0	0	0	0	1	1	0	2
5	156650082	A	C	000011	000011	134	0	97	0	52	0	60	0	50	23	64	23	503	0	0	0	0	1	1	0	0	0	0	1	1	0	2
5	157826735	C	A	000011	000011	53	0	112	1	65	0	115	0	57	18	75	20	516	0	0	0	0	1	1	0	0	0	0	1	1	0	2
5	158969995	G	T	000110	110111	27	7	37	9	31	0	25	10	22	11	31	6	216	0	0	0	1	1	0	1	1	0	1	1	1	3	5
5	160049811	A	G	000011	000011	78	0	103	0	58	1	66	1	46	25	44	11	433	0	0	0	0	1	1	0	0	0	0	1	1	0	2
5	160753632	G	A	000010	000010	50	0	97	0	55	0	135	0	42	12	101	0	492	0	0	0	0	1	0	0	0	0	0	1	0	0	1
5	163896043	G	T	001010	011110	28	1	51	3	19	7	24	4	24	3	27	1	192	0	0	1	0	1	0	0	1	1	1	1	0	2	4
5	164126611	C	T	000011	000011	58	0	80	1	39	0	76	0	25	12	54	17	362	0	0	0	0	1	1	0	0	0	0	1	1	0	2
5	166260805	C	T	000011	000011	79	1	61	0	36	0	78	0	35	15	46	14	365	0	0	0	0	1	1	0	0	0	0	1	1	0	2
5	167589569	C	T	000010	000011	126	0	63	0	33	0	42	0	36	14	46	4	364	0	0	0	0	1	0	0	0	0	0	1	1	1	2
5	169844918	C	T	000011	000011	90	0	88	0	47	0	78	1	58	19	61	17	459	0	0	0	0	1	1	0	0	0	0	1	1	0	2
5	170241592	T	G	000011	000011	34	0	86	0	38	0	99	1	43	13	52	29	395	0	0	0	0	1	1	0	0	0	0	1	1	0	2
5	170900776	A	T	100000	101101	31	8	43	1	25	3	47	2	20	0	51	2	233	1	0	0	0	0	0	1	0	1	1	0	1	3	4
5	174675652	C	G	000011	000011	95	0	154	0	56	0	101	0	77	33	95	38	649	0	0	0	0	1	1	0	0	0	0	1	1	0	2
5	177000919	C	A	000010	101110	43	3	35	1	23	3	31	3	32	7	45	1	227	0	0	0	0	1	0	1	0	1	1	1	0	3	4
6	3755606	G	C	000011	000011	112	1	78	0	39	0	100	0	42	27	54	27	480	0	0	0	0	1	1	0	0	0	0	1	1	0	2
6	4662227	C	A	000011	000011	62	0	72	0	38	0	69	0	25	13	26	14	319	0	0	0	0	1	1	0	0	0	0	1	1	0	2
6	4851201	G	A	001000	001000	70	0	115	0	30	6	101	0	84	0	118	0	524	0	0	1	0	0	0	0	0	1	0	0	0	0	1
6	5737800	C	T	000100	000100	135	1	86	0	43	0	43	10	101	0	91	0	510	0	0	0	1	0	0	0	0	0	1	0	0	0	1
6	7145178	C	T	001000	001000	78	0	159	0	57	8	152	0	117	0	154	0	725	0	0	1	0	0	0	0	0	1	0	0	0	0	1
6	9847648	G	A	001000	001000	92	0	141	0	55	9	106	0	157	0	144	0	704	0	0	1	0	0	0	0	0	1	0	0	0	0	1
6	10319834	G	A	010110	110111	52	10	45	8	28	1	18	4	63	16	44	3	292	0	1	0	1	1	0	1	1	0	1	1	1	2	5
6	18583916	G	A	000010	000010	81	0	89	0	59	0	70	0	53	10	69	0	431	0	0	0	0	1	0	0	0	0	0	1	0	0	1
6	19190526	A	C	000011	000011	54	0	140	0	61	0	154	0	87	36	89	32	653	0	0	0	0	1	1	0	0	0	0	1	1	0	2
6	20441745	T	C	000011	000011	75	0	132	0	51	0	113	0	58	32	86	30	577	0	0	0	0	1	1	0	0	0	0	1	1	0	2
6	24927462	C	T	011011	111011	297	21	49	8	31	4	23	1	66	5	41	6	552	0	1	1	0	1	1	1	1	1	0	1	1	1	5
6	28869832	A	G	001000	001000	95	0	125	0	42	8	133	0	102	0	123	0	628	0	0	1	0	0	0	0	0	1	0	0	0	0	1
6	30558996	T	G	000011	000011	101	0	117	0	41	0	85	0	88	39	65	32	568	0	0	0	0	1	1	0	0	0	0	1	1	0	2
6	33572048	C	A	100001	101111	54	20	34	1	26	2	33	3	43	12	25	9	262	1	0	0	0	0	1	1	0	1	1	1	1	3	5
6	35989461	G	A	000001	110111	39	7	57	14	36	1	38	5	38	13	38	19	305	0	0	0	0	0	1	1	1	0	1	1	1	4	5
6	41885748	C	G	001000	001000	72	0	87	0	59	10	97	0	107	0	117	0	549	0	0	1	0	0	0	0	0	1	0	0	0	0	1
6	42696425	C	A	000011	000011	73	0	43	0	39	0	33	0	20	8	31	15	262	0	0	0	0	1	1	0	0	0	0	1	1	0	2
6	43394732	C	T	000011	000011	112	0	66	0	34	0	79	0	57	22	80	14	464	0	0	0	0	1	1	0	0	0	0	1	1	0	2
6	43482871	G	A	011101	111101	86	3	66	7	28	5	47	6	74	0	53	6	381	0	1	1	1	0	1	1	1	1	1	0	1	1	5
6	43482877	C	T	011100	111101	86	3	65	4	25	4	51	6	66	0	54	4	368	0	1	1	1	0	0	1	1	1	1	0	1	2	5
6	44103512	C	T	000001	000001	70	1	72	0	55	0	66	1	74	0	50	7	396	0	0	0	0	0	1	0	0	0	0	0	1	0	1
6	50762099	C	T	000011	000011	45	0	82	0	37	0	80	1	44	17	46	27	379	0	0	0	0	1	1	0	0	0	0	1	1	0	2
6	51592224	G	A	000011	000011	89	0	128	0	58	0	107	0	79	38	76	21	596	0	0	0	0	1	1	0	0	0	0	1	1	0	2
6	52312221	A	G	000011	000011	97	0	165	1	63	1	112	0	98	35	93	26	691	0	0	0	0	1	1	0	0	0	0	1	1	0	2
6	57617517	C	T	010000	010000	71	0	90	16	41	1	80	1	81	0	84	0	465	0	1	0	0	0	0	0	1	0	0	0	0	0	1
6	58491413	T	C	100001	110111	68	17	124	16	42	1	102	18	65	15	71	16	555	1	0	0	0	0	1	1	1	0	1	1	1	3	5
6	58731397	A	G	001000	111011	53	2	144	10	44	7	118	1	84	6	104	6	579	0	0	1	0	0	0	1	1	1	0	1	1	4	5
6	62016172	C	A	000011	000011	108	0	105	0	45	0	82	1	46	18	87	19	511	0	0	0	0	1	1	0	0	0	0	1	1	0	2
6	62916687	G	A	000011	000011	53	0	96	0	36	0	103	1	34	11	83	17	434	0	0	0	0	1	1	0	0	0	0	1	1	0	2
6	62927979	G	A	000100	000100	85	0	127	1	70	0	75	11	64	0	103	0	536	0	0	0	1	0	0	0	0	0	1	0	0	0	1
6	63273880	C	A	000011	000011	44	0	102	1	30	0	88	0	42	20	67	16	410	0	0	0	0	1	1	0	0	0	0	1	1	0	2
6	63530326	A	T	000011	000011	34	0	94	1	42	0	95	0	56	19	60	25	426	0	0	0	0	1	1	0	0	0	0	1	1	0	2
6	64080733	T	A	000011	000011	50	0	64	0	54	0	104	1	41	17	63	20	414	0	0	0	0	1	1	0	0	0	0	1	1	0	2
6	66665163	C	T	000011	000011	39	0	116	0	64	0	127	0	55	28	84	25	538	0	0	0	0	1	1	0	0	0	0	1	1	0	2
6	68758576	G	A	000010	000011	109	1	133	0	63	0	95	0	66	15	123	2	607	0	0	0	0	1	0	0	0	0	0	1	1	1	2
6	71770733	G	T	001000	001000	83	1	134	1	44	7	137	0	90	0	118	0	615	0	0	1	0	0	0	0	0	1	0	0	0	0	1
6	72103482	A	T	001000	011000	95	0	177	3	45	9	158	0	162	0	193	0	842	0	0	1	0	0	0	0	1	1	0	0	0	1	2
6	72255699	G	A	000011	000011	54	0	108	0	65	0	103	0	77	35	76	18	536	0	0	0	0	1	1	0	0	0	0	1	1	0	2
6	72287638	T	A	001000	001010	49	0	48	0	20	6	39	1	51	2	48	0	264	0	0	1	0	0	0	0	0	1	0	1	0	1	2
6	72397249	C	T	000011	000011	109	0	110	0	45	0	106	0	62	30	67	24	553	0	0	0	0	1	1	0	0	0	0	1	1	0	2
6	73250887	A	C	000011	000011	121	0	156	0	86	0	121	0	94	48	111	28	765	0	0	0	0	1	1	0	0	0	0	1	1	0	2
6	74104823	C	T	000011	000011	130	0	48	0	39	0	45	0	28	17	23	11	341	0	0	0	0	1	1	0	0	0	0	1	1	0	2
6	75044692	A	G	000010	000011	84	0	158	0	67	0	117	0	98	20	141	3	688	0	0	0	0	1	0	0	0	0	0	1	1	1	2
6	75247435	A	G	000011	000011	119	0	110	0	52	0	78	1	70	37	88	25	580	0	0	0	0	1	1	0	0	0	0	1	1	0	2
6	78873059	G	A	001000	001000	84	0	106	0	38	6	87	0	58	0	85	0	464	0	0	1	0	0	0	0	0	1	0	0	0	0	1
6	79530527	G	A	000011	000011	81	0	137	1	53	0	112	0	67	26	68	22	567	0	0	0	0	1	1	0	0	0	0	1	1	0	2
6	81400529	G	C	000100	000100	124	0	125	1	62	0	111	13	166	0	142	1	745	0	0	0	1	0	0	0	0	0	1	0	0	0	1
6	83437687	A	T	001000	011101	25	1	38	2	17	6	47	3	42	1	66	4	252	0	0	1	0	0	0	0	1	1	1	0	1	3	4
6	84009487	A	C	000011	000011	96	0	129	0	70	0	97	0	54	29	71	18	564	0	0	0	0	1	1	0	0	0	0	1	1	0	2
6	85868157	C	T	000011	000011	103	0	129	0	48	0	83	1	59	15	83	21	542	0	0	0	0	1	1	0	0	0	0	1	1	0	2
6	86378716	T	A	001000	011000	53	0	113	2	35	9	123	0	57	0	93	0	485	0	0	1	0	0	0	0	1	1	0	0	0	1	2
6	86517894	G	A	000011	000011	123	0	94	0	59	0	63	0	82	28	52	21	522	0	0	0	0	1	1	0	0	0	0	1	1	0	2
6	88765848	C	T	000011	100011	144	5	72	0	52	1	77	0	48	17	65	19	500	0	0	0	0	1	1	1	0	0	0	1	1	1	3
6	91311372	G	A	000001	000001	86	0	137	0	55	0	99	0	106	0	97	11	591	0	0	0	0	0	1	0	0	0	0	0	1	0	1
6	93239377	A	T	000100	000100	20	0	79	0	63	0	90	10	39	0	89	1	391	0	0	0	1	0	0	0	0	0	1	0	0	0	1
6	94481613	A	C	000011	010011	74	0	158	2	65	0	134	0	85	27	88	42	675	0	0	0	0	1	1	0	1	0	0	1	1	1	3
6	94527989	C	T	000011	000011	52	0	130	0	43	0	131	0	38	15	74	21	504	0	0	0	0	1	1	0	0	0	0	1	1	0	2
6	95101830	A	G	100001	110111	32	19	40	19	36	1	33	8	31	5	28	21	273	1	0	0	0	0	1	1	1	0	1	1	1	3	5
6	98002693	G	T	000011	000011	82	1	157	0	50	0	130	0	54	30	89	23	616	0	0	0	0	1	1	0	0	0	0	1	1	0	2
6	98190903	G	T	000011	001011	62	0	147	1	59	2	156	0	94	39	88	41	689	0	0	0	0	1	1	0	0	1	0	1	1	1	3
6	98785306	C	T	001000	011000	56	0	111	4	34	13	78	0	75	0	79	0	450	0	0	1	0	0	0	0	1	1	0	0	0	1	2
6	99242877	T	C	000100	000100	24	0	106	0	47	0	107	13	56	0	100	0	453	0	0	0	1	0	0	0	0	0	1	0	0	0	1
6	105334101	G	T	000011	110111	40	5	46	5	42	0	45	3	30	7	38	10	271	0	0	0	0	1	1	1	1	0	1	1	1	3	5
6	106988075	G	C	000011	000011	146	1	115	1	53	0	85	1	77	48	101	35	663	0	0	0	0	1	1	0	0	0	0	1	1	0	2
6	107697289	T	A	001000	001000	77	0	138	0	48	8	129	0	123	0	109	0	632	0	0	1	0	0	0	0	0	1	0	0	0	0	1
6	108477279	T	C	000011	000011	44	0	99	0	49	0	91	0	57	26	70	28	464	0	0	0	0	1	1	0	0	0	0	1	1	0	2
6	109851719	T	C	000011	000011	56	0	156	0	65	0	119	0	64	26	71	19	576	0	0	0	0	1	1	0	0	0	0	1	1	0	2
6	113061236	G	C	000011	000011	84	0	147	0	68	0	114	0	67	29	95	22	626	0	0	0	0	1	1	0	0	0	0	1	1	0	2
6	114595219	T	A	000011	000011	75	0	116	0	51	0	116	0	70	48	84	24	584	0	0	0	0	1	1	0	0	0	0	1	1	0	2
6	117631362	C	T	000011	000011	46	0	92	0	41	0	69	1	21	17	48	19	354	0	0	0	0	1	1	0	0	0	0	1	1	0	2
6	120339784	G	T	010000	010000	89	0	120	18	59	0	89	1	92	0	97	0	565	0	1	0	0	0	0	0	1	0	0	0	0	0	1
6	121259898	C	A	001000	001000	88	0	143	1	59	10	126	1	102	0	132	0	662	0	0	1	0	0	0	0	0	1	0	0	0	0	1
6	122921159	T	G	100100	111110	19	3	71	5	32	4	46	10	39	3	79	1	312	1	0	0	1	0	0	1	1	1	1	1	0	3	5
6	123492985	T	A	010000	010000	98	0	114	24	60	0	119	0	92	0	115	0	622	0	1	0	0	0	0	0	1	0	0	0	0	0	1
6	124821918	G	A	000100	000100	30	0	81	0	52	0	68	9	68	0	75	0	383	0	0	0	1	0	0	0	0	0	1	0	0	0	1
6	124941074	C	T	000011	000011	70	0	127	0	50	0	116	0	51	22	81	28	545	0	0	0	0	1	1	0	0	0	0	1	1	0	2
6	128614028	C	A	010000	010000	38	0	122	16	64	0	141	0	66	0	123	0	570	0	1	0	0	0	0	0	1	0	0	0	0	0	1
6	128659383	G	T	000010	000011	116	0	159	0	61	1	118	0	101	18	165	6	745	0	0	0	0	1	0	0	0	0	0	1	1	1	2
6	129426782	A	G	001000	011000	51	0	136	2	55	8	119	0	97	0	133	0	601	0	0	1	0	0	0	0	1	1	0	0	0	1	2
6	129735295	T	C	000100	000100	52	0	118	0	69	0	113	15	53	0	94	1	515	0	0	0	1	0	0	0	0	0	1	0	0	0	1
6	130148386	A	G	000011	000011	84	0	107	0	76	0	113	0	50	25	81	21	557	0	0	0	0	1	1	0	0	0	0	1	1	0	2
6	131293503	A	C	000100	000100	38	0	76	0	32	0	59	7	76	0	89	0	377	0	0	0	1	0	0	0	0	0	1	0	0	0	1
6	132038275	C	T	000100	000100	56	0	77	0	31	0	77	14	57	0	84	0	396	0	0	0	1	0	0	0	0	0	1	0	0	0	1
6	132111759	T	C	110111	110111	87	22	75	19	53	0	59	17	38	10	54	30	464	1	1	0	1	1	1	1	1	0	1	1	1	0	5
6	132181985	G	C	001000	001000	38	0	111	0	36	11	86	0	60	0	98	0	440	0	0	1	0	0	0	0	0	1	0	0	0	0	1
6	132719654	C	G	000001	110111	38	7	81	9	39	0	45	5	36	5	46	12	323	0	0	0	0	0	1	1	1	0	1	1	1	4	5
6	133232838	C	A	100000	100000	50	7	79	0	36	0	65	0	36	1	86	0	360	1	0	0	0	0	0	1	0	0	0	0	0	0	1
6	137680258	C	G	001000	001000	53	0	84	1	43	8	86	0	37	0	76	0	388	0	0	1	0	0	0	0	0	1	0	0	0	0	1
6	137683645	C	A	001001	111101	30	2	50	2	16	4	23	3	28	1	33	5	197	0	0	1	0	0	1	1	1	1	1	0	1	3	5
6	139287655	T	C	000011	000011	130	0	157	0	77	0	134	0	81	42	116	43	780	0	0	0	0	1	1	0	0	0	0	1	1	0	2
6	143883653	G	A	000011	000011	144	0	102	0	46	0	98	0	58	26	74	14	562	0	0	0	0	1	1	0	0	0	0	1	1	0	2
6	146461278	C	T	000011	010011	20	0	37	2	25	1	31	1	22	5	38	6	188	0	0	0	0	1	1	0	1	0	0	1	1	1	3
6	146614568	A	G	000011	000011	23	0	103	0	37	0	104	0	26	14	63	26	396	0	0	0	0	1	1	0	0	0	0	1	1	0	2
6	147413255	A	C	000011	000011	109	0	117	0	62	1	83	1	52	26	83	22	556	0	0	0	0	1	1	0	0	0	0	1	1	0	2
6	147768797	C	T	000010	000010	122	0	119	1	45	0	86	0	88	10	95	0	566	0	0	0	0	1	0	0	0	0	0	1	0	0	1
6	151054845	G	A	000010	000010	157	0	89	1	48	0	84	1	84	10	89	0	563	0	0	0	0	1	0	0	0	0	0	1	0	0	1
6	151842134	C	T	100000	110111	66	13	112	5	61	1	95	6	94	6	97	7	563	1	0	0	0	0	0	1	1	0	1	1	1	4	5
6	152173407	A	T	000011	000011	45	0	93	1	36	0	98	1	50	25	71	31	451	0	0	0	0	1	1	0	0	0	0	1	1	0	2
6	152302861	A	T	000010	000011	49	0	164	0	68	0	137	0	113	15	155	2	703	0	0	0	0	1	0	0	0	0	0	1	1	1	2
6	155480986	A	T	000011	000011	66	0	107	0	51	0	106	0	50	12	61	25	478	0	0	0	0	1	1	0	0	0	0	1	1	0	2
6	155899886	G	A	000100	000100	47	0	122	0	53	0	95	14	65	0	94	0	490	0	0	0	1	0	0	0	0	0	1	0	0	0	1
6	158170901	G	A	000011	000011	72	0	119	0	42	0	116	0	75	27	88	26	565	0	0	0	0	1	1	0	0	0	0	1	1	0	2
6	160281432	T	C	000011	000011	142	0	104	0	58	0	90	0	59	16	74	31	574	0	0	0	0	1	1	0	0	0	0	1	1	0	2
6	160791448	G	A	000010	000011	98	0	132	0	59	0	88	0	55	16	72	2	522	0	0	0	0	1	0	0	0	0	0	1	1	1	2
6	163854132	G	A	000011	000011	53	0	145	1	69	1	130	0	55	29	88	32	603	0	0	0	0	1	1	0	0	0	0	1	1	0	2
6	164445836	A	T	000011	000011	56	0	108	0	45	0	95	0	37	21	45	15	422	0	0	0	0	1	1	0	0	0	0	1	1	0	2
6	165142082	C	T	000011	000011	27	0	112	1	56	0	134	0	33	23	74	30	490	0	0	0	0	1	1	0	0	0	0	1	1	0	2
6	166167357	A	G	000010	000010	49	0	105	0	55	1	117	0	52	8	111	0	498	0	0	0	0	1	0	0	0	0	0	1	0	0	1
6	166690647	G	T	001000	011000	125	0	73	2	33	11	54	1	62	0	56	0	417	0	0	1	0	0	0	0	1	1	0	0	0	1	2
6	168059133	G	A	000010	110111	61	9	73	6	43	0	68	14	53	20	55	11	413	0	0	0	0	1	0	1	1	0	1	1	1	4	5
6	168792999	C	T	110110	110111	94	19	37	10	30	0	36	8	74	8	43	7	366	1	1	0	1	1	0	1	1	0	1	1	1	1	5
6	169114489	C	T	001000	001000	156	0	85	0	36	9	63	0	96	0	73	0	518	0	0	1	0	0	0	0	0	1	0	0	0	0	1
6	170176568	G	A	000011	000011	269	0	102	0	43	0	65	0	92	31	49	27	678	0	0	0	0	1	1	0	0	0	0	1	1	0	2
6	170792683	G	A	000011	000011	28	0	74	0	53	0	69	1	26	16	49	16	332	0	0	0	0	1	1	0	0	0	0	1	1	0	2
7	507711	C	A	101001	111011	121	14	81	12	43	7	63	1	74	8	58	8	490	1	0	1	0	0	1	1	1	1	0	1	1	2	5
7	625394	G	A	001000	001000	106	1	65	0	22	6	60	0	62	0	48	0	370	0	0	1	0	0	0	0	0	1	0	0	0	0	1
7	1035013	C	A	000011	000011	109	0	47	0	29	0	34	0	40	17	25	8	309	0	0	0	0	1	1	0	0	0	0	1	1	0	2
7	1327587	G	A	000010	000011	74	0	41	0	23	0	24	0	27	13	23	2	227	0	0	0	0	1	0	0	0	0	0	1	1	1	2
7	2004149	A	G	000011	000011	91	0	53	0	36	0	71	0	40	18	48	15	372	0	0	0	0	1	1	0	0	0	0	1	1	0	2
7	4088138	C	A	000011	000011	139	0	84	0	44	0	49	0	54	22	60	24	476	0	0	0	0	1	1	0	0	0	0	1	1	0	2
7	5001511	C	T	011111	011111	37	1	35	9	18	7	28	8	22	3	35	3	206	0	1	1	1	1	1	0	1	1	1	1	1	0	5
7	8856820	T	C	001000	001000	42	0	118	0	47	8	126	0	92	0	108	0	541	0	0	1	0	0	0	0	0	1	0	0	0	0	1
7	9454165	C	G	000011	000011	26	0	71	1	46	0	75	0	21	9	46	14	309	0	0	0	0	1	1	0	0	0	0	1	1	0	2
7	9685774	A	G	000011	000011	99	0	197	0	60	0	134	0	107	39	102	34	772	0	0	0	0	1	1	0	0	0	0	1	1	0	2
7	9881480	G	A	000001	000011	70	0	114	1	56	0	130	0	76	3	78	13	541	0	0	0	0	0	1	0	0	0	0	1	1	1	2
7	10099940	C	T	000011	000011	57	0	115	0	55	0	92	0	49	24	62	16	470	0	0	0	0	1	1	0	0	0	0	1	1	0	2
7	12399786	C	T	001000	001000	35	0	119	1	39	9	119	0	61	0	102	0	485	0	0	1	0	0	0	0	0	1	0	0	0	0	1
7	13529376	C	T	001000	011000	154	0	91	9	35	8	89	1	86	1	53	0	527	0	0	1	0	0	0	0	1	1	0	0	0	1	2
7	15274093	G	T	000011	000011	103	0	201	0	58	0	146	0	91	25	99	26	749	0	0	0	0	1	1	0	0	0	0	1	1	0	2
7	20164467	C	A	000101	110111	28	9	36	7	24	1	22	8	20	8	21	13	197	0	0	0	1	0	1	1	1	0	1	1	1	3	5
7	20246701	A	G	010000	010000	36	0	91	17	49	1	84	0	63	0	107	0	448	0	1	0	0	0	0	0	1	0	0	0	0	0	1
7	21598562	C	A	000010	000010	74	0	125	0	51	1	118	1	49	9	107	1	536	0	0	0	0	1	0	0	0	0	0	1	0	0	1
7	22491057	T	C	000010	000010	38	0	119	0	55	0	116	0	67	11	109	0	515	0	0	0	0	1	0	0	0	0	0	1	0	0	1
7	23471088	C	T	000011	000011	49	0	105	0	59	0	115	0	55	20	69	22	494	0	0	0	0	1	1	0	0	0	0	1	1	0	2
7	27673171	G	A	010000	010000	122	0	101	18	47	0	93	0	90	1	100	0	572	0	1	0	0	0	0	0	1	0	0	0	0	0	1
7	28297273	G	T	000011	000011	79	0	137	0	57	0	93	0	55	15	80	22	538	0	0	0	0	1	1	0	0	0	0	1	1	0	2
7	31548507	C	T	000011	000011	101	0	116	0	50	0	119	1	79	33	68	27	594	0	0	0	0	1	1	0	0	0	0	1	1	0	2
7	39656898	A	C	100000	110111	33	23	75	16	48	1	69	21	43	14	78	20	441	1	0	0	0	0	0	1	1	0	1	1	1	4	5
7	40194911	G	A	000001	000011	43	0	59	0	35	0	67	0	48	2	50	8	312	0	0	0	0	0	1	0	0	0	0	1	1	1	2
7	41324528	C	A	000011	000011	87	1	102	1	52	0	83	1	46	20	66	15	474	0	0	0	0	1	1	0	0	0	0	1	1	0	2
7	43089109	C	G	000100	000100	57	0	93	0	53	0	94	18	44	0	73	0	432	0	0	0	1	0	0	0	0	0	1	0	0	0	1
7	43497110	G	A	000011	100111	112	3	102	1	42	1	75	2	65	21	57	18	499	0	0	0	0	1	1	1	0	0	1	1	1	2	4
7	43920127	G	T	000001	000001	167	0	137	1	65	0	105	0	123	1	106	19	724	0	0	0	0	0	1	0	0	0	0	0	1	0	1
7	44194230	C	T	000010	000010	122	0	65	0	46	0	74	0	63	8	47	1	426	0	0	0	0	1	0	0	0	0	0	1	0	0	1
7	44474624	T	C	010000	010000	88	0	105	19	53	0	102	1	112	1	103	0	584	0	1	0	0	0	0	0	1	0	0	0	0	0	1
7	45206029	C	T	000011	000011	63	0	77	0	49	0	80	0	40	16	60	13	398	0	0	0	0	1	1	0	0	0	0	1	1	0	2
7	48055523	G	T	000100	000100	97	1	116	1	56	0	71	14	102	0	101	0	559	0	0	0	1	0	0	0	0	0	1	0	0	0	1
7	48312440	C	T	000001	000001	67	0	132	0	53	0	120	0	87	0	105	17	581	0	0	0	0	0	1	0	0	0	0	0	1	0	1
7	48702963	C	T	000011	000011	114	0	135	1	58	0	103	0	66	25	54	12	568	0	0	0	0	1	1	0	0	0	0	1	1	0	2
7	49948894	A	T	000011	010011	73	0	120	2	55	0	100	0	64	23	66	17	520	0	0	0	0	1	1	0	1	0	0	1	1	1	3
7	50479541	C	T	000011	000011	163	0	75	0	49	0	66	0	33	19	53	12	470	0	0	0	0	1	1	0	0	0	0	1	1	0	2
7	50856199	C	T	000011	000011	155	0	87	1	39	0	65	0	74	34	54	21	530	0	0	0	0	1	1	0	0	0	0	1	1	0	2
7	51137405	T	A	000011	000011	115	0	138	0	57	0	105	1	89	34	104	26	669	0	0	0	0	1	1	0	0	0	0	1	1	0	2
7	51296829	G	A	000011	000011	86	1	71	0	38	0	56	0	59	26	46	23	406	0	0	0	0	1	1	0	0	0	0	1	1	0	2
7	56078312	G	A	100111	110111	55	5	56	3	29	0	66	8	36	9	63	6	336	1	0	0	1	1	1	1	1	0	1	1	1	1	5
7	56777341	G	T	011001	111011	53	6	35	3	34	3	42	0	46	3	27	2	254	0	1	1	0	0	1	1	1	1	0	1	1	2	5
7	57670521	C	G	011010	111011	84	8	89	11	62	6	74	1	71	11	79	6	502	0	1	1	0	1	0	1	1	1	0	1	1	2	5
7	57670560	C	T	011010	111011	107	4	89	14	57	6	73	0	82	12	91	5	540	0	1	1	0	1	0	1	1	1	0	1	1	2	5
7	57712698	C	T	000100	110110	128	8	54	5	34	0	46	10	69	4	35	1	394	0	0	0	1	0	0	1	1	0	1	1	0	3	4
7	57712708	A	G	000100	110110	127	6	56	4	33	0	47	10	64	4	37	1	389	0	0	0	1	0	0	1	1	0	1	1	0	3	4
7	58038702	G	A	000011	000111	52	0	125	1	61	1	120	3	67	21	68	25	544	0	0	0	0	1	1	0	0	0	1	1	1	1	3
7	61850459	T	A	001000	111110	49	3	123	5	69	13	120	5	84	3	98	1	573	0	0	1	0	0	0	1	1	1	1	1	0	4	5
7	62038923	C	A	000010	000010	56	0	127	0	72	0	126	0	89	16	113	0	599	0	0	0	0	1	0	0	0	0	0	1	0	0	1
7	62470674	T	C	111100	111101	46	7	55	9	28	8	45	7	38	1	41	3	288	1	1	1	1	0	0	1	1	1	1	0	1	1	5
7	62470675	G	T	111100	111101	49	7	55	9	27	9	43	8	39	1	39	4	290	1	1	1	1	0	0	1	1	1	1	0	1	1	5
7	63274158	G	T	010111	011111	28	1	48	11	39	2	55	12	21	10	45	14	286	0	1	0	1	1	1	0	1	1	1	1	1	1	5
7	65637247	A	G	000011	000011	54	0	57	0	42	0	63	1	35	12	60	14	338	0	0	0	0	1	1	0	0	0	0	1	1	0	2
7	66145523	A	C	100011	110111	43	33	26	12	30	1	34	10	28	20	33	17	287	1	0	0	0	1	1	1	1	0	1	1	1	2	5
7	67912157	A	G	001000	001000	57	0	124	1	35	7	68	0	75	0	81	0	448	0	0	1	0	0	0	0	0	1	0	0	0	0	1
7	68029004	T	G	000011	000011	34	0	104	0	49	0	112	0	48	17	57	13	434	0	0	0	0	1	1	0	0	0	0	1	1	0	2
7	68114017	C	T	000011	000011	70	0	110	1	35	0	82	0	46	15	56	13	428	0	0	0	0	1	1	0	0	0	0	1	1	0	2
7	69657918	G	A	001000	101000	106	2	150	1	56	8	120	0	138	1	109	0	691	0	0	1	0	0	0	1	0	1	0	0	0	1	2
7	71093707	G	A	000100	000100	58	1	54	0	30	0	47	6	31	0	43	0	270	0	0	0	1	0	0	0	0	0	1	0	0	0	1
7	71131925	G	T	000011	000011	96	0	91	0	45	0	103	0	54	12	59	10	470	0	0	0	0	1	1	0	0	0	0	1	1	0	2
7	71679207	G	C	000011	000011	126	0	68	0	42	0	69	0	41	12	42	15	415	0	0	0	0	1	1	0	0	0	0	1	1	0	2
7	72839353	T	C	001000	101101	108	8	78	1	41	6	56	2	74	1	68	2	445	0	0	1	0	0	0	1	0	1	1	0	1	3	4
7	75482930	C	T	000011	110111	106	6	69	2	37	0	65	2	60	20	41	20	428	0	0	0	0	1	1	1	1	0	1	1	1	3	5
7	76626731	G	A	010111	110111	116	13	41	8	30	1	35	4	62	12	40	8	370	0	1	0	1	1	1	1	1	0	1	1	1	1	5
7	77354265	T	G	000011	000011	73	0	54	0	55	0	75	1	55	14	67	24	418	0	0	0	0	1	1	0	0	0	0	1	1	0	2
7	84994920	C	A	000011	000011	43	0	137	0	57	0	126	0	45	20	74	46	548	0	0	0	0	1	1	0	0	0	0	1	1	0	2
7	85767100	A	C	000011	000011	38	0	88	0	42	0	78	0	30	4	52	15	347	0	0	0	0	1	1	0	0	0	0	1	1	0	2
7	86050925	G	A	000011	000011	75	0	154	0	63	0	148	0	47	17	88	22	614	0	0	0	0	1	1	0	0	0	0	1	1	0	2
7	93948841	G	A	010000	110000	97	2	98	13	47	0	100	0	87	0	111	0	555	0	1	0	0	0	0	1	1	0	0	0	0	1	2
7	94532384	G	A	010000	010000	82	0	118	16	60	0	115	0	112	0	133	0	636	0	1	0	0	0	0	0	1	0	0	0	0	0	1
7	100247767	A	G	000011	000011	224	0	91	0	39	0	81	0	68	35	55	17	610	0	0	0	0	1	1	0	0	0	0	1	1	0	2
7	103050168	T	A	001000	011000	60	0	67	3	36	7	94	0	54	0	73	0	394	0	0	1	0	0	0	0	1	1	0	0	0	1	2
7	104346953	C	T	001000	001000	139	0	124	1	49	9	94	0	106	0	91	0	613	0	0	1	0	0	0	0	0	1	0	0	0	0	1
7	105230359	T	C	000011	000011	96	0	99	0	37	0	79	0	63	31	62	16	483	0	0	0	0	1	1	0	0	0	0	1	1	0	2
7	107216219	C	T	001000	111110	147	2	129	4	62	8	120	2	92	4	129	1	700	0	0	1	0	0	0	1	1	1	1	1	0	4	5
7	107463702	G	T	000011	000011	34	0	92	1	40	0	120	0	44	29	78	27	465	0	0	0	0	1	1	0	0	0	0	1	1	0	2
7	108950128	G	A	000011	000011	252	1	126	0	51	0	82	0	87	45	62	35	741	0	0	0	0	1	1	0	0	0	0	1	1	0	2
7	111988191	A	G	000011	000011	101	0	157	1	58	0	103	0	82	42	92	41	677	0	0	0	0	1	1	0	0	0	0	1	1	0	2
7	113275112	T	A	000011	000011	93	0	167	1	62	0	137	0	90	36	108	43	737	0	0	0	0	1	1	0	0	0	0	1	1	0	2
7	114029691	T	G	000011	000011	63	0	143	0	60	0	128	0	76	39	93	17	619	0	0	0	0	1	1	0	0	0	0	1	1	0	2
7	115531931	G	C	010000	010000	93	0	104	14	69	0	116	1	90	0	111	0	598	0	1	0	0	0	0	0	1	0	0	0	0	0	1
7	117795948	G	T	000100	000100	41	0	147	0	63	1	114	20	103	0	130	0	619	0	0	0	1	0	0	0	0	0	1	0	0	0	1
7	120344595	G	A	000100	000100	33	0	102	1	63	0	90	19	107	1	132	0	548	0	0	0	1	0	0	0	0	0	1	0	0	0	1
7	120719316	C	T	010100	110111	104	5	151	13	64	1	106	18	146	9	149	4	770	0	1	0	1	0	0	1	1	0	1	1	1	3	5
7	121092540	G	A	001000	001000	58	0	139	1	54	8	126	0	66	0	94	0	546	0	0	1	0	0	0	0	0	1	0	0	0	0	1
7	122565841	G	T	010000	010001	101	0	105	18	61	0	107	1	116	1	116	2	628	0	1	0	0	0	0	0	1	0	0	0	1	1	2
7	125138727	T	A	000011	000011	21	0	64	0	39	0	74	1	25	4	51	22	301	0	0	0	0	1	1	0	0	0	0	1	1	0	2
7	126286360	A	G	001011	001011	54	1	75	1	24	2	58	1	54	10	46	9	335	0	0	1	0	1	1	0	0	1	0	1	1	0	3
7	132965265	G	C	000011	000011	134	0	137	0	78	0	127	0	90	32	117	40	755	0	0	0	0	1	1	0	0	0	0	1	1	0	2
7	133727918	G	A	000010	000010	109	0	116	0	46	0	88	0	90	12	95	0	556	0	0	0	0	1	0	0	0	0	0	1	0	0	1
7	135601544	G	T	000011	000011	60	0	91	0	43	0	81	0	46	24	66	19	430	0	0	0	0	1	1	0	0	0	0	1	1	0	2
7	135700311	A	G	000010	000011	40	0	101	0	43	0	107	0	45	8	90	8	442	0	0	0	0	1	0	0	0	0	0	1	1	1	2
7	136328383	T	C	000011	000011	33	0	77	0	53	0	100	0	31	18	81	15	408	0	0	0	0	1	1	0	0	0	0	1	1	0	2
7	136714604	C	T	000010	000010	84	0	112	1	59	0	113	0	66	15	91	0	541	0	0	0	0	1	0	0	0	0	0	1	0	0	1
7	137007555	T	C	000011	000011	49	0	110	0	61	0	90	0	49	16	80	18	473	0	0	0	0	1	1	0	0	0	0	1	1	0	2
7	138929120	A	T	000001	000001	59	0	111	1	40	0	115	1	87	0	127	14	555	0	0	0	0	0	1	0	0	0	0	0	1	0	1
7	139545923	T	C	000010	000010	65	0	96	0	39	0	84	0	78	13	107	1	483	0	0	0	0	1	0	0	0	0	0	1	0	0	1
7	141945554	A	G	001000	001000	77	0	64	0	31	7	61	0	71	0	64	0	375	0	0	1	0	0	0	0	0	1	0	0	0	0	1
7	142461199	C	G	101101	111101	20	2	34	2	17	4	31	4	28	1	17	3	163	1	0	1	1	0	1	1	1	1	1	0	1	1	5
7	142468205	A	C	010011	110111	73	4	74	12	47	1	51	5	67	15	52	9	410	0	1	0	0	1	1	1	1	0	1	1	1	2	5
7	145717367	C	T	000011	000011	40	0	70	0	31	0	61	0	31	16	37	14	300	0	0	0	0	1	1	0	0	0	0	1	1	0	2
7	146045298	G	A	010000	010000	96	0	76	14	46	0	85	0	63	0	70	0	450	0	1	0	0	0	0	0	1	0	0	0	0	0	1
7	146292002	C	A	000011	001011	81	0	132	0	51	2	112	0	63	8	62	16	527	0	0	0	0	1	1	0	0	1	0	1	1	1	3
7	148076006	T	C	000011	000011	90	0	113	0	48	0	98	0	64	29	66	23	531	0	0	0	0	1	1	0	0	0	0	1	1	0	2
7	150455756	A	T	101001	111101	45	6	73	7	25	9	57	4	41	0	42	5	314	1	0	1	0	0	1	1	1	1	1	0	1	2	5
7	150455757	G	C	101000	111101	45	5	73	7	25	9	57	3	40	0	40	5	309	1	0	1	0	0	0	1	1	1	1	0	1	3	5
7	152820862	C	A	000011	000011	110	0	95	1	51	0	100	1	50	22	50	17	497	0	0	0	0	1	1	0	0	0	0	1	1	0	2
7	152859314	G	A	100000	110101	66	10	108	4	51	0	104	9	78	1	87	3	521	1	0	0	0	0	0	1	1	0	1	0	1	3	4
7	154149446	C	T	001000	001000	99	0	75	0	39	7	79	0	55	0	62	0	416	0	0	1	0	0	0	0	0	1	0	0	0	0	1
7	155228263	C	T	000011	010011	82	0	56	2	28	0	49	0	43	15	37	10	322	0	0	0	0	1	1	0	1	0	0	1	1	1	3
7	155891637	C	T	000010	100010	142	2	88	0	31	0	69	0	48	8	52	0	440	0	0	0	0	1	0	1	0	0	0	1	0	1	2
7	158136106	C	T	000011	000011	100	0	57	0	33	0	60	0	45	20	37	13	365	0	0	0	0	1	1	0	0	0	0	1	1	0	2
7	158258516	A	G	000011	000011	143	0	75	0	31	0	69	0	60	17	46	11	452	0	0	0	0	1	1	0	0	0	0	1	1	0	2
8	1960263	G	A	001000	101010	122	2	64	0	30	7	61	1	69	3	72	0	431	0	0	1	0	0	0	1	0	1	0	1	0	2	3
8	3501768	C	T	000100	000100	64	0	87	0	47	0	95	14	90	0	75	0	472	0	0	0	1	0	0	0	0	0	1	0	0	0	1
8	3531549	G	A	000011	000011	134	0	113	0	53	0	86	0	61	22	49	19	537	0	0	0	0	1	1	0	0	0	0	1	1	0	2
8	5563775	C	T	000011	000011	43	0	92	0	47	0	88	0	34	13	58	20	395	0	0	0	0	1	1	0	0	0	0	1	1	0	2
8	9030600	C	A	010000	010000	77	0	55	9	48	0	69	1	58	0	69	0	386	0	1	0	0	0	0	0	1	0	0	0	0	0	1
8	10449727	C	T	000010	000010	82	0	80	1	30	0	49	0	64	12	59	0	377	0	0	0	0	1	0	0	0	0	0	1	0	0	1
8	13570291	C	A	001000	001000	54	0	133	1	65	14	109	0	73	1	107	0	557	0	0	1	0	0	0	0	0	1	0	0	0	0	1
8	14218424	C	T	000010	010010	91	0	107	2	76	0	132	1	82	13	107	0	611	0	0	0	0	1	0	0	1	0	0	1	0	1	2
8	14966671	C	T	000011	000011	37	0	126	0	42	0	144	0	45	20	85	12	511	0	0	0	0	1	1	0	0	0	0	1	1	0	2
8	17873638	C	A	000011	000011	121	0	99	0	46	0	100	0	65	25	92	33	581	0	0	0	0	1	1	0	0	0	0	1	1	0	2
8	21002502	G	A	000010	000010	69	0	100	0	39	0	73	0	39	6	85	0	411	0	0	0	0	1	0	0	0	0	0	1	0	0	1
8	23296612	A	G	000001	000001	51	0	125	1	38	0	138	0	48	0	88	10	499	0	0	0	0	0	1	0	0	0	0	0	1	0	1
8	23755213	C	A	001000	011111	34	1	106	6	29	9	96	13	57	3	95	7	456	0	0	1	0	0	0	0	1	1	1	1	1	4	5
8	24049213	G	A	001000	001000	55	0	106	1	59	9	123	0	65	0	139	0	557	0	0	1	0	0	0	0	0	1	0	0	0	0	1
8	24491572	C	A	000001	000001	66	0	111	0	63	1	81	1	87	0	92	13	515	0	0	0	0	0	1	0	0	0	0	0	1	0	1
8	25132822	C	G	000010	000010	82	0	138	0	45	0	107	0	97	12	105	0	586	0	0	0	0	1	0	0	0	0	0	1	0	0	1
8	25535532	T	C	001000	011010	61	0	47	2	32	6	44	0	61	2	56	0	311	0	0	1	0	0	0	0	1	1	0	1	0	2	3
8	26680091	G	A	000011	000011	73	1	144	0	81	1	112	0	87	32	83	35	649	0	0	0	0	1	1	0	0	0	0	1	1	0	2
8	28931934	T	A	000011	000011	100	0	60	0	40	0	57	0	46	30	36	10	379	0	0	0	0	1	1	0	0	0	0	1	1	0	2
8	29289659	G	A	010000	010101	29	0	46	8	20	0	44	5	60	1	50	3	266	0	1	0	0	0	0	0	1	0	1	0	1	2	3
8	30518953	G	A	000011	000011	69	0	102	1	47	0	74	0	54	15	66	17	445	0	0	0	0	1	1	0	0	0	0	1	1	0	2
8	34257138	G	A	000011	000011	64	0	94	1	40	0	86	0	54	18	43	19	419	0	0	0	0	1	1	0	0	0	0	1	1	0	2
8	34953292	C	T	100000	100000	26	7	46	0	31	0	42	0	23	0	51	1	227	1	0	0	0	0	0	1	0	0	0	0	0	0	1
8	36497954	T	C	000011	000011	59	0	130	0	42	0	138	0	26	21	72	18	506	0	0	0	0	1	1	0	0	0	0	1	1	0	2
8	38644046	G	A	000011	000011	81	0	95	1	49	0	91	0	58	24	84	24	507	0	0	0	0	1	1	0	0	0	0	1	1	0	2
8	40842865	G	T	001000	001000	88	0	79	1	29	5	71	0	60	0	72	0	405	0	0	1	0	0	0	0	0	1	0	0	0	0	1
8	41731811	A	C	010011	110111	47	8	27	6	26	0	38	10	31	8	25	4	230	0	1	0	0	1	1	1	1	0	1	1	1	2	5
8	43319315	G	A	000011	000011	35	0	76	0	52	0	92	0	24	13	59	26	377	0	0	0	0	1	1	0	0	0	0	1	1	0	2
8	49086625	A	G	100100	110111	208	36	96	8	46	1	62	8	115	7	69	7	663	1	0	0	1	0	0	1	1	0	1	1	1	3	5
8	49090378	C	T	001000	001000	98	0	78	1	28	5	68	0	64	0	54	0	396	0	0	1	0	0	0	0	0	1	0	0	0	0	1
8	50900409	C	T	010000	010000	68	1	85	25	56	1	92	0	88	0	123	0	539	0	1	0	0	0	0	0	1	0	0	0	0	0	1
8	53232482	C	T	000100	000100	94	0	114	0	51	0	71	11	97	0	89	0	527	0	0	0	1	0	0	0	0	0	1	0	0	0	1
8	54741107	T	A	000011	000011	124	0	166	0	66	0	119	0	129	47	102	29	782	0	0	0	0	1	1	0	0	0	0	1	1	0	2
8	55863945	C	T	000001	000001	35	0	69	0	60	0	79	0	40	0	62	10	355	0	0	0	0	0	1	0	0	0	0	0	1	0	1
8	56028214	G	A	000011	000011	153	0	108	0	51	0	80	0	97	29	80	27	625	0	0	0	0	1	1	0	0	0	0	1	1	0	2
8	56570032	C	T	000011	010011	84	0	131	2	39	0	92	0	67	20	71	35	541	0	0	0	0	1	1	0	1	0	0	1	1	1	3
8	60023298	G	T	000011	010011	56	0	100	3	25	1	88	0	47	13	62	21	416	0	0	0	0	1	1	0	1	0	0	1	1	1	3
8	61522133	T	C	000011	000011	115	0	137	0	73	0	115	0	93	39	93	26	691	0	0	0	0	1	1	0	0	0	0	1	1	0	2
8	64538190	G	T	000011	000011	52	0	149	0	58	0	151	0	62	21	84	25	602	0	0	0	0	1	1	0	0	0	0	1	1	0	2
8	67175023	T	C	000011	000011	97	0	128	0	63	1	124	0	56	29	72	20	590	0	0	0	0	1	1	0	0	0	0	1	1	0	2
8	67229073	G	A	000011	010111	84	0	93	2	44	0	88	2	46	15	53	16	443	0	0	0	0	1	1	0	1	0	1	1	1	2	4
8	69599110	C	T	000011	000011	69	1	146	0	60	0	135	0	71	33	103	30	648	0	0	0	0	1	1	0	0	0	0	1	1	0	2
8	71521508	C	T	000011	000011	126	0	127	0	45	0	135	0	64	21	91	24	633	0	0	0	0	1	1	0	0	0	0	1	1	0	2
8	74939392	C	T	000011	000011	121	0	106	0	36	0	88	0	47	17	65	20	500	0	0	0	0	1	1	0	0	0	0	1	1	0	2
8	76173762	G	A	010000	010000	90	0	137	24	77	0	130	0	89	0	119	0	666	0	1	0	0	0	0	0	1	0	0	0	0	0	1
8	76798804	A	T	000011	000011	38	0	126	0	64	1	113	0	36	21	70	30	499	0	0	0	0	1	1	0	0	0	0	1	1	0	2
8	82492265	C	T	000011	010011	36	0	116	2	55	0	113	0	42	17	75	31	487	0	0	0	0	1	1	0	1	0	0	1	1	1	3
8	83176684	C	A	001000	011000	45	0	111	9	53	14	142	1	70	0	112	0	557	0	0	1	0	0	0	0	1	1	0	0	0	1	2
8	84212605	C	A	001000	001000	22	0	35	1	16	7	38	1	19	1	32	1	173	0	0	1	0	0	0	0	0	1	0	0	0	0	1
8	84822965	T	A	000001	000011	65	0	130	1	72	0	127	0	91	5	101	17	609	0	0	0	0	0	1	0	0	0	0	1	1	1	2
8	87319768	G	A	000100	000100	70	0	109	0	49	1	86	15	98	0	130	0	558	0	0	0	1	0	0	0	0	0	1	0	0	0	1
8	90406695	T	G	000011	000011	62	0	99	0	51	0	89	0	60	31	57	21	470	0	0	0	0	1	1	0	0	0	0	1	1	0	2
8	93124943	G	A	001000	001001	28	0	55	0	25	8	58	1	67	1	75	3	321	0	0	1	0	0	0	0	0	1	0	0	1	1	2
8	94031906	G	A	000100	000100	72	0	124	0	68	0	100	12	70	0	101	0	547	0	0	0	1	0	0	0	0	0	1	0	0	0	1
8	100658834	T	G	001000	001000	154	0	157	0	49	11	102	0	119	1	134	0	727	0	0	1	0	0	0	0	0	1	0	0	0	0	1
8	102497931	C	G	000011	000011	84	0	124	1	64	0	121	0	82	39	93	38	646	0	0	0	0	1	1	0	0	0	0	1	1	0	2
8	103886090	G	A	000010	000010	110	0	114	0	53	0	88	0	101	15	102	0	583	0	0	0	0	1	0	0	0	0	0	1	0	0	1
8	108949158	C	T	000011	000011	75	0	122	0	61	1	88	0	51	17	67	27	509	0	0	0	0	1	1	0	0	0	0	1	1	0	2
8	109529972	C	T	010000	010000	74	0	138	22	70	0	115	0	100	0	133	1	653	0	1	0	0	0	0	0	1	0	0	0	0	0	1
8	109837165	A	G	010000	010000	84	0	127	14	65	0	94	1	82	1	108	0	576	0	1	0	0	0	0	0	1	0	0	0	0	0	1
8	112609915	C	G	000010	000010	66	0	124	1	61	0	120	0	68	9	104	0	553	0	0	0	0	1	0	0	0	0	0	1	0	0	1
8	112891810	G	T	000011	000011	64	0	122	0	52	0	91	1	46	21	67	29	493	0	0	0	0	1	1	0	0	0	0	1	1	0	2
8	112985858	G	T	000011	000011	57	0	114	0	44	0	126	0	65	17	84	23	530	0	0	0	0	1	1	0	0	0	0	1	1	0	2
8	115870963	G	C	000011	000011	64	0	130	0	68	0	120	1	63	31	89	34	600	0	0	0	0	1	1	0	0	0	0	1	1	0	2
8	120087384	G	A	000010	010010	48	0	119	2	68	0	93	0	79	13	109	0	531	0	0	0	0	1	0	0	1	0	0	1	0	1	2
8	120105122	G	T	000011	000011	89	0	106	1	51	0	100	0	60	36	72	47	562	0	0	0	0	1	1	0	0	0	0	1	1	0	2
8	120840603	T	C	000011	100011	99	2	121	1	51	0	114	1	106	31	95	27	648	0	0	0	0	1	1	1	0	0	0	1	1	1	3
8	122033893	A	C	000011	000011	126	0	159	0	60	0	136	0	76	23	88	30	698	0	0	0	0	1	1	0	0	0	0	1	1	0	2
8	122247064	A	G	000001	000001	34	0	145	0	47	0	105	0	84	0	90	21	526	0	0	0	0	0	1	0	0	0	0	0	1	0	1
8	123111103	G	A	000001	010111	66	1	78	3	37	1	72	6	68	7	70	12	421	0	0	0	0	0	1	0	1	0	1	1	1	3	4
8	125596897	A	G	000011	000011	121	0	118	0	45	0	102	0	105	30	78	26	625	0	0	0	0	1	1	0	0	0	0	1	1	0	2
8	127710714	G	A	000100	000100	77	0	146	0	55	0	115	18	84	0	160	0	655	0	0	0	1	0	0	0	0	0	1	0	0	0	1
8	129111238	C	T	000010	000010	117	0	113	0	50	0	84	0	116	13	113	0	606	0	0	0	0	1	0	0	0	0	0	1	0	0	1
8	133034721	G	A	010000	010000	108	0	99	16	53	0	105	0	107	0	83	1	572	0	1	0	0	0	0	0	1	0	0	0	0	0	1
8	133472402	G	A	000100	000100	64	0	88	0	35	1	82	11	41	0	69	0	391	0	0	0	1	0	0	0	0	0	1	0	0	0	1
8	135170742	G	A	000011	000011	56	0	124	1	42	0	109	0	46	14	77	20	489	0	0	0	0	1	1	0	0	0	0	1	1	0	2
8	138289713	A	G	000011	000011	70	0	120	0	46	0	104	0	54	28	66	30	518	0	0	0	0	1	1	0	0	0	0	1	1	0	2
8	138787204	T	C	000010	000010	42	0	122	0	52	0	109	0	73	9	88	0	495	0	0	0	0	1	0	0	0	0	0	1	0	0	1
8	141821686	G	T	000011	000011	94	0	137	0	69	0	123	0	71	35	107	36	672	0	0	0	0	1	1	0	0	0	0	1	1	0	2
8	141922058	G	A	000100	000100	73	0	136	0	63	0	94	17	74	1	123	0	581	0	0	0	1	0	0	0	0	0	1	0	0	0	1
8	143304006	T	C	001001	111011	80	9	38	8	21	4	37	1	53	3	47	6	307	0	0	1	0	0	1	1	1	1	0	1	1	3	5
9	1790786	C	A	000100	000100	91	0	88	0	50	0	86	14	91	0	87	0	507	0	0	0	1	0	0	0	0	0	1	0	0	0	1
9	5596153	T	C	000011	000011	122	0	147	0	54	0	129	0	93	38	107	26	716	0	0	0	0	1	1	0	0	0	0	1	1	0	2
9	5853504	G	T	000011	000011	120	0	130	0	44	0	106	0	80	28	66	38	612	0	0	0	0	1	1	0	0	0	0	1	1	0	2
9	7881611	G	A	000011	100011	76	2	100	0	38	1	106	1	54	17	54	19	468	0	0	0	0	1	1	1	0	0	0	1	1	1	3
9	8637530	C	T	000011	000011	45	0	121	1	58	0	102	0	37	15	79	21	479	0	0	0	0	1	1	0	0	0	0	1	1	0	2
9	8936427	C	A	011101	011101	25	0	32	4	18	5	29	7	21	1	31	6	179	0	1	1	1	0	1	0	1	1	1	0	1	0	4
9	10195580	C	T	000011	000011	80	0	142	0	39	1	112	0	69	29	79	34	585	0	0	0	0	1	1	0	0	0	0	1	1	0	2
9	11297971	A	C	000100	000100	25	0	47	0	22	0	49	7	37	0	35	0	222	0	0	0	1	0	0	0	0	0	1	0	0	0	1
9	12022574	T	C	000100	000100	33	0	83	0	39	0	88	10	30	0	76	0	359	0	0	0	1	0	0	0	0	0	1	0	0	0	1
9	13894344	G	C	000100	000100	148	0	165	0	64	0	128	15	98	0	173	0	791	0	0	0	1	0	0	0	0	0	1	0	0	0	1
9	23304594	C	T	000100	000100	35	0	112	0	55	0	87	15	56	0	95	0	455	0	0	0	1	0	0	0	0	0	1	0	0	0	1
9	23411411	C	T	000100	000100	115	1	132	0	75	0	108	17	90	0	138	0	676	0	0	0	1	0	0	0	0	0	1	0	0	0	1
9	25101390	C	G	000001	110111	19	2	81	8	43	1	93	8	48	3	59	13	378	0	0	0	0	0	1	1	1	0	1	1	1	4	5
9	25473514	C	A	000100	000100	20	0	83	0	39	0	77	10	53	0	78	1	361	0	0	0	1	0	0	0	0	0	1	0	0	0	1
9	26231651	G	A	010000	010000	58	1	110	17	63	0	124	0	53	0	97	0	523	0	1	0	0	0	0	0	1	0	0	0	0	0	1
9	30056775	A	T	000100	000100	47	0	139	1	52	0	129	14	72	0	121	0	575	0	0	0	1	0	0	0	0	0	1	0	0	0	1
9	30754678	G	A	100010	110111	22	7	80	15	58	0	58	17	51	14	62	17	401	1	0	0	0	1	0	1	1	0	1	1	1	3	5
9	33490099	G	A	100000	111101	58	12	96	5	40	3	86	6	84	1	103	10	504	1	0	0	0	0	0	1	1	1	1	0	1	4	5
9	33826332	C	T	000011	000011	103	0	112	1	48	1	84	0	69	20	73	22	533	0	0	0	0	1	1	0	0	0	0	1	1	0	2
9	36274101	G	C	001000	101110	66	4	37	1	15	7	44	2	46	2	44	1	269	0	0	1	0	0	0	1	0	1	1	1	0	3	4
9	38404049	C	A	000011	000011	104	1	86	0	50	0	64	1	59	23	55	15	458	0	0	0	0	1	1	0	0	0	0	1	1	0	2
9	75024399	A	C	001000	001000	42	0	119	0	38	7	94	0	75	0	90	0	465	0	0	1	0	0	0	0	0	1	0	0	0	0	1
9	76390038	C	A	000011	000011	21	1	115	0	49	0	113	0	33	21	77	18	448	0	0	0	0	1	1	0	0	0	0	1	1	0	2
9	78910594	G	T	000011	000011	99	0	112	0	68	0	118	0	63	21	70	14	565	0	0	0	0	1	1	0	0	0	0	1	1	0	2
9	79141286	A	G	000011	000011	104	0	142	1	59	0	120	0	117	48	103	29	723	0	0	0	0	1	1	0	0	0	0	1	1	0	2
9	84931254	C	T	100000	100000	37	6	99	1	54	1	119	0	69	1	88	1	476	1	0	0	0	0	0	1	0	0	0	0	0	0	1
9	86376202	C	A	000011	110111	25	3	74	14	50	0	77	16	44	12	57	16	388	0	0	0	0	1	1	1	1	0	1	1	1	3	5
9	87232974	C	G	000010	000010	58	0	109	0	53	0	100	0	67	13	115	0	515	0	0	0	0	1	0	0	0	0	0	1	0	0	1
9	88016640	C	T	000011	000111	79	0	98	1	42	0	76	2	63	26	76	25	488	0	0	0	0	1	1	0	0	0	1	1	1	1	3
9	91132653	C	T	000001	110001	59	2	107	2	47	0	92	0	83	0	97	11	500	0	0	0	0	0	1	1	1	0	0	0	1	2	3
9	96564813	C	T	000001	000001	117	0	69	0	38	0	62	0	78	0	60	9	433	0	0	0	0	0	1	0	0	0	0	0	1	0	1
9	98744995	A	G	000011	000011	22	0	128	0	38	0	103	0	44	20	67	33	455	0	0	0	0	1	1	0	0	0	0	1	1	0	2
9	99298876	C	A	000011	000011	110	1	147	0	78	0	137	0	90	33	102	31	729	0	0	0	0	1	1	0	0	0	0	1	1	0	2
9	99989991	C	T	010010	010011	69	1	47	6	31	1	48	1	33	4	59	4	304	0	1	0	0	1	0	0	1	0	0	1	1	1	3
9	100920401	T	C	000011	000011	125	0	82	0	57	0	72	0	77	47	62	21	543	0	0	0	0	1	1	0	0	0	0	1	1	0	2
9	101363553	C	G	000100	000100	95	1	90	0	54	0	78	10	73	0	84	0	485	0	0	0	1	0	0	0	0	0	1	0	0	0	1
9	101558122	C	A	000011	000011	94	0	81	1	43	0	62	0	67	18	51	30	447	0	0	0	0	1	1	0	0	0	0	1	1	0	2
9	101852119	G	A	000100	000100	107	0	116	0	52	1	82	13	114	0	96	0	581	0	0	0	1	0	0	0	0	0	1	0	0	0	1
9	103328192	C	A	000011	000011	60	0	133	0	52	1	99	0	49	33	53	21	501	0	0	0	0	1	1	0	0	0	0	1	1	0	2
9	103754760	A	G	000010	000010	60	0	105	0	49	0	130	0	80	11	95	0	530	0	0	0	0	1	0	0	0	0	0	1	0	0	1
9	105471682	G	T	000011	000011	39	0	127	0	55	0	102	1	48	25	87	26	510	0	0	0	0	1	1	0	0	0	0	1	1	0	2
9	105571754	C	T	001000	001000	136	0	105	0	42	8	64	0	80	0	70	0	505	0	0	1	0	0	0	0	0	1	0	0	0	0	1
9	106430705	A	G	000100	000100	47	0	125	0	45	0	117	13	46	0	113	0	506	0	0	0	1	0	0	0	0	0	1	0	0	0	1
9	117678475	C	A	000010	000110	65	0	117	0	49	0	140	2	92	11	104	0	580	0	0	0	0	1	0	0	0	0	1	1	0	1	2
9	118184617	C	T	000011	000011	45	0	123	0	57	0	119	0	44	15	82	22	507	0	0	0	0	1	1	0	0	0	0	1	1	0	2
9	122911283	C	A	000010	000010	57	0	68	0	40	0	57	0	53	11	48	0	334	0	0	0	0	1	0	0	0	0	0	1	0	0	1
9	125058044	T	G	000011	000011	90	0	99	0	44	0	96	0	62	22	73	32	518	0	0	0	0	1	1	0	0	0	0	1	1	0	2
9	125369056	A	G	001000	101000	69	2	73	1	27	7	46	0	53	0	57	0	335	0	0	1	0	0	0	1	0	1	0	0	0	1	2
9	126377638	C	A	000011	000011	112	0	115	0	41	0	66	0	73	40	67	24	538	0	0	0	0	1	1	0	0	0	0	1	1	0	2
9	131522626	C	T	000011	100011	96	3	57	1	34	0	65	0	37	17	52	14	376	0	0	0	0	1	1	1	0	0	0	1	1	1	3
9	132431132	G	C	010000	010000	45	0	53	10	31	0	80	0	34	0	60	0	313	0	1	0	0	0	0	0	1	0	0	0	0	0	1
9	134355146	A	C	100011	110111	23	29	30	13	21	1	40	10	18	20	19	11	235	1	0	0	0	1	1	1	1	0	1	1	1	2	5
9	140098321	T	G	011000	111011	25	4	17	5	14	7	20	1	23	3	29	3	151	0	1	1	0	0	0	1	1	1	0	1	1	3	5
9	140405897	G	A	110110	110111	134	25	44	16	21	1	28	9	57	9	50	10	404	1	1	0	1	1	0	1	1	0	1	1	1	1	5
10	574346	A	G	000010	110010	90	5	40	3	24	1	29	0	38	7	34	1	272	0	0	0	0	1	0	1	1	0	0	1	0	2	3
10	1995555	G	A	000011	000011	64	0	62	0	39	0	51	0	39	11	38	9	313	0	0	0	0	1	1	0	0	0	0	1	1	0	2
10	8063508	C	T	010111	110111	59	3	48	6	47	1	50	5	49	6	45	6	325	0	1	0	1	1	1	1	1	0	1	1	1	1	5
10	8063558	A	G	010111	110111	64	3	56	6	46	1	42	5	45	6	40	6	320	0	1	0	1	1	1	1	1	0	1	1	1	1	5
10	8063559	C	T	010111	110111	63	3	58	6	46	1	43	4	44	6	40	6	320	0	1	0	1	1	1	1	1	0	1	1	1	1	5
10	10974373	A	G	000011	000011	42	1	107	1	41	0	99	0	34	14	63	15	417	0	0	0	0	1	1	0	0	0	0	1	1	0	2
10	13317238	T	A	000011	000011	100	0	92	0	60	0	83	0	59	24	62	16	496	0	0	0	0	1	1	0	0	0	0	1	1	0	2
10	14437035	A	C	001000	001000	72	1	60	1	18	6	62	0	58	0	55	1	334	0	0	1	0	0	0	0	0	1	0	0	0	0	1
10	16033405	T	G	010000	010000	76	0	93	19	60	0	93	0	72	0	95	0	508	0	1	0	0	0	0	0	1	0	0	0	0	0	1
10	16033424	A	G	010000	010000	76	0	93	16	63	0	100	0	76	0	94	0	518	0	1	0	0	0	0	0	1	0	0	0	0	0	1
10	19967832	C	T	000011	001011	94	0	151	0	64	2	109	0	83	33	104	27	667	0	0	0	0	1	1	0	0	1	0	1	1	1	3
10	23263705	G	A	000011	000011	72	0	84	0	47	0	93	0	42	20	60	21	439	0	0	0	0	1	1	0	0	0	0	1	1	0	2
10	26941002	G	A	000010	110111	78	6	68	3	46	0	71	3	51	8	72	3	409	0	0	0	0	1	0	1	1	0	1	1	1	4	5
10	29258540	C	T	001000	001000	47	0	96	0	47	7	64	0	56	0	68	0	385	0	0	1	0	0	0	0	0	1	0	0	0	0	1
10	29281770	G	T	000001	000001	78	1	125	1	54	0	112	1	100	0	107	15	594	0	0	0	0	0	1	0	0	0	0	0	1	0	1
10	31416542	C	A	000011	000011	139	0	139	0	54	0	81	0	82	40	70	19	624	0	0	0	0	1	1	0	0	0	0	1	1	0	2
10	37434091	G	C	001100	011111	67	1	122	10	48	9	96	12	115	4	126	11	621	0	0	1	1	0	0	0	1	1	1	1	1	3	5
10	37852069	G	A	001000	001000	54	0	114	1	51	10	106	1	74	0	85	0	496	0	0	1	0	0	0	0	0	1	0	0	0	0	1
10	45576574	T	C	000011	000011	94	0	135	0	58	0	113	0	70	36	77	23	606	0	0	0	0	1	1	0	0	0	0	1	1	0	2
10	47029891	A	G	011111	011111	28	1	105	38	35	12	80	28	49	21	74	32	503	0	1	1	1	1	1	0	1	1	1	1	1	0	5
10	54058840	C	T	001000	011000	90	0	185	3	65	8	156	0	137	0	151	0	795	0	0	1	0	0	0	0	1	1	0	0	0	1	2
10	54445504	A	C	100000	110111	60	10	99	9	40	1	113	9	81	7	80	6	515	1	0	0	0	0	0	1	1	0	1	1	1	4	5
10	55423687	A	G	000011	000011	49	0	123	0	45	0	120	0	50	13	65	24	489	0	0	0	0	1	1	0	0	0	0	1	1	0	2
10	55447019	G	A	000011	000011	81	0	87	0	36	0	81	0	34	14	69	22	424	0	0	0	0	1	1	0	0	0	0	1	1	0	2
10	55750029	T	C	001000	011101	39	0	77	3	46	9	59	3	57	0	59	2	354	0	0	1	0	0	0	0	1	1	1	0	1	3	4
10	56784637	C	G	000011	000011	97	0	140	0	69	0	140	0	72	37	96	38	689	0	0	0	0	1	1	0	0	0	0	1	1	0	2
10	56825613	C	T	000100	000100	38	0	125	0	53	1	88	12	67	0	148	0	532	0	0	0	1	0	0	0	0	0	1	0	0	0	1
10	57908028	A	G	000011	000011	88	0	141	0	55	0	137	0	81	29	97	38	666	0	0	0	0	1	1	0	0	0	0	1	1	0	2
10	58124365	G	A	000001	000011	71	0	118	0	73	0	143	0	70	3	115	25	618	0	0	0	0	0	1	0	0	0	0	1	1	1	2
10	58285909	C	T	000010	000010	95	0	79	1	43	0	62	0	50	12	65	1	408	0	0	0	0	1	0	0	0	0	0	1	0	0	1
10	60155930	C	G	000001	110111	44	10	80	4	53	0	73	14	57	10	58	20	423	0	0	0	0	0	1	1	1	0	1	1	1	4	5
10	63173261	A	T	001000	001000	102	0	174	1	57	9	137	1	158	0	162	0	801	0	0	1	0	0	0	0	0	1	0	0	0	0	1
10	64105549	C	A	000011	000011	129	0	104	0	50	0	86	0	74	33	48	26	550	0	0	0	0	1	1	0	0	0	0	1	1	0	2
10	65822206	C	T	000010	000010	120	0	116	1	39	1	94	0	69	14	77	0	531	0	0	0	0	1	0	0	0	0	0	1	0	0	1
10	66559927	C	T	000011	000011	26	0	88	0	37	0	61	1	26	12	51	19	321	0	0	0	0	1	1	0	0	0	0	1	1	0	2
10	68476958	C	T	001000	001000	47	0	84	0	33	6	66	0	67	0	81	0	384	0	0	1	0	0	0	0	0	1	0	0	0	0	1
10	70684030	A	T	000011	010111	79	0	81	2	38	0	81	2	66	17	52	21	439	0	0	0	0	1	1	0	1	0	1	1	1	2	4
10	71901286	A	C	000100	000100	36	0	59	0	48	0	54	9	26	0	51	0	283	0	0	0	1	0	0	0	0	0	1	0	0	0	1
10	74911988	A	G	000011	000011	81	1	159	0	69	0	134	0	71	30	92	32	669	0	0	0	0	1	1	0	0	0	0	1	1	0	2
10	75178589	C	A	000100	000100	102	0	163	0	61	0	115	14	121	0	144	0	720	0	0	0	1	0	0	0	0	0	1	0	0	0	1
10	75316888	A	T	000011	000011	59	0	95	1	42	0	89	0	41	22	77	29	455	0	0	0	0	1	1	0	0	0	0	1	1	0	2
10	75351457	A	C	000011	000011	49	0	123	0	53	0	127	0	72	35	83	22	564	0	0	0	0	1	1	0	0	0	0	1	1	0	2
10	77714254	A	C	000011	000011	132	1	114	1	55	0	90	0	78	28	56	18	573	0	0	0	0	1	1	0	0	0	0	1	1	0	2
10	79355280	C	A	001000	011000	71	0	58	6	25	15	75	0	75	0	94	0	419	0	0	1	0	0	0	0	1	1	0	0	0	1	2
10	79668202	G	A	000011	000011	103	0	71	0	43	0	61	0	79	29	46	32	464	0	0	0	0	1	1	0	0	0	0	1	1	0	2
10	80735665	C	T	000011	000011	88	0	71	0	34	0	54	0	56	22	36	16	377	0	0	0	0	1	1	0	0	0	0	1	1	0	2
10	81050382	C	A	000011	000011	111	0	58	0	34	0	37	0	40	9	41	10	340	0	0	0	0	1	1	0	0	0	0	1	1	0	2
10	83084124	G	T	000100	000100	42	0	167	0	50	0	112	22	58	0	134	0	585	0	0	0	1	0	0	0	0	0	1	0	0	0	1
10	83477380	G	A	001000	001000	104	0	126	1	46	11	115	0	81	0	126	0	610	0	0	1	0	0	0	0	0	1	0	0	0	0	1
10	92534166	G	A	000010	000010	36	0	113	0	55	1	92	1	61	11	98	0	468	0	0	0	0	1	0	0	0	0	0	1	0	0	1
10	99023051	C	T	000011	000011	81	0	119	0	52	0	120	0	61	41	114	45	633	0	0	0	0	1	1	0	0	0	0	1	1	0	2
10	100618434	G	C	001000	001000	70	0	122	0	50	11	106	1	65	0	93	0	518	0	0	1	0	0	0	0	0	1	0	0	0	0	1
10	100852057	G	A	010000	010000	81	0	115	19	65	0	135	0	71	1	119	0	606	0	1	0	0	0	0	0	1	0	0	0	0	0	1
10	102159537	C	T	011001	011101	21	1	22	4	23	3	37	2	35	1	23	4	176	0	1	1	0	0	1	0	1	1	1	0	1	1	4
10	103013309	C	G	000011	000011	103	0	47	0	40	0	41	0	36	20	31	15	333	0	0	0	0	1	1	0	0	0	0	1	1	0	2
10	104609293	C	A	000100	000100	95	0	68	0	30	0	76	9	69	0	69	1	417	0	0	0	1	0	0	0	0	0	1	0	0	0	1
10	106117625	A	G	001000	011100	157	1	160	6	50	8	114	3	66	0	119	0	684	0	0	1	0	0	0	0	1	1	1	0	0	2	3
10	106117626	C	T	001000	011100	158	1	158	6	52	7	116	3	66	0	120	0	687	0	0	1	0	0	0	0	1	1	1	0	0	2	3
10	106831829	T	A	000011	000011	69	0	95	0	45	0	68	0	38	12	44	24	395	0	0	0	0	1	1	0	0	0	0	1	1	0	2
10	108932420	G	T	010000	010000	92	0	94	18	49	1	124	0	87	1	131	0	597	0	1	0	0	0	0	0	1	0	0	0	0	0	1
10	110386214	C	T	000011	000011	44	0	81	1	49	0	85	0	48	9	71	13	401	0	0	0	0	1	1	0	0	0	0	1	1	0	2
10	112175089	T	C	000011	000011	132	0	99	0	40	0	107	0	85	43	84	34	624	0	0	0	0	1	1	0	0	0	0	1	1	0	2
10	113396786	C	G	000010	000010	62	0	126	0	40	0	84	0	61	10	82	0	465	0	0	0	0	1	0	0	0	0	0	1	0	0	1
10	113594074	C	A	000100	010110	57	0	88	2	32	0	60	11	61	6	82	0	399	0	0	0	1	0	0	0	1	0	1	1	0	2	3
10	115865993	T	C	000001	110111	13	8	45	9	35	0	41	5	28	4	28	20	236	0	0	0	0	0	1	1	1	0	1	1	1	4	5
10	117353354	T	A	000011	000011	23	0	84	0	45	0	93	0	38	11	70	24	388	0	0	0	0	1	1	0	0	0	0	1	1	0	2
10	118876194	T	C	000011	000011	66	1	101	0	56	0	83	0	60	27	69	31	494	0	0	0	0	1	1	0	0	0	0	1	1	0	2
10	119438717	C	A	000011	000011	107	0	84	1	38	0	73	0	41	20	35	16	415	0	0	0	0	1	1	0	0	0	0	1	1	0	2
10	119458225	A	G	000011	000011	86	0	115	1	47	0	70	0	48	19	58	25	469	0	0	0	0	1	1	0	0	0	0	1	1	0	2
10	119613081	C	T	000011	000011	39	0	94	0	51	0	82	0	38	16	59	24	403	0	0	0	0	1	1	0	0	0	0	1	1	0	2
10	119731236	A	G	001000	011000	93	0	108	2	37	7	90	0	91	0	103	0	531	0	0	1	0	0	0	0	1	1	0	0	0	1	2
10	120305101	C	T	110111	110111	117	27	73	8	46	0	42	10	84	10	67	8	492	1	1	0	1	1	1	1	1	0	1	1	1	0	5
10	121509207	G	T	000010	000010	85	0	119	0	56	0	130	0	65	9	111	0	575	0	0	0	0	1	0	0	0	0	0	1	0	0	1
10	121879280	A	T	001000	001000	36	0	97	0	35	6	85	0	54	0	66	0	379	0	0	1	0	0	0	0	0	1	0	0	0	0	1
10	126484992	C	T	000011	000011	151	0	107	0	49	0	87	0	77	42	67	27	607	0	0	0	0	1	1	0	0	0	0	1	1	0	2
10	126809343	C	A	000011	000011	131	0	118	1	46	0	80	0	77	46	75	26	600	0	0	0	0	1	1	0	0	0	0	1	1	0	2
10	127711543	C	T	000011	000011	68	0	133	1	64	0	118	0	80	21	83	34	602	0	0	0	0	1	1	0	0	0	0	1	1	0	2
10	128199137	G	A	000011	000011	35	0	77	0	46	0	79	0	31	13	59	14	354	0	0	0	0	1	1	0	0	0	0	1	1	0	2
10	129595809	C	T	000001	111011	86	7	65	7	41	4	51	1	78	12	40	11	403	0	0	0	0	0	1	1	1	1	0	1	1	4	5
10	130183135	C	T	000010	000010	101	0	93	0	53	0	64	0	70	9	69	0	459	0	0	0	0	1	0	0	0	0	0	1	0	0	1
10	131095057	A	C	000100	000110	151	0	115	0	76	0	57	10	92	3	60	0	564	0	0	0	1	0	0	0	0	0	1	1	0	1	2
10	131385857	G	T	001000	001000	54	0	85	0	30	9	89	1	43	0	74	1	386	0	0	1	0	0	0	0	0	1	0	0	0	0	1
10	132099392	G	C	110111	110111	83	19	44	6	38	1	16	4	40	6	24	2	283	1	1	0	1	1	1	1	1	0	1	1	1	0	5
10	133184753	A	G	001000	111110	53	2	36	4	16	6	25	2	35	3	29	0	211	0	0	1	0	0	0	1	1	1	1	1	0	4	5
10	133212662	C	T	000011	000011	34	0	78	0	39	0	77	0	43	16	41	5	333	0	0	0	0	1	1	0	0	0	0	1	1	0	2
11	3164090	T	G	000011	000011	67	1	42	0	21	0	29	1	27	7	22	8	225	0	0	0	0	1	1	0	0	0	0	1	1	0	2
11	3229580	C	T	000011	000011	77	0	56	0	36	0	51	0	44	23	38	12	337	0	0	0	0	1	1	0	0	0	0	1	1	0	2
11	5058949	G	A	000100	000100	131	0	142	0	56	0	83	12	112	0	95	0	631	0	0	0	1	0	0	0	0	0	1	0	0	0	1
11	7539134	G	A	000010	000010	116	1	56	0	28	0	46	0	39	6	57	1	350	0	0	0	0	1	0	0	0	0	0	1	0	0	1
11	7899387	G	C	000100	000100	51	0	98	0	42	0	94	12	24	0	70	0	391	0	0	0	1	0	0	0	0	0	1	0	0	0	1
11	8793802	A	C	000011	000011	66	0	96	0	33	0	97	0	51	11	71	31	456	0	0	0	0	1	1	0	0	0	0	1	1	0	2
11	9239564	C	G	010000	010000	110	0	100	13	55	0	125	0	61	0	105	0	569	0	1	0	0	0	0	0	1	0	0	0	0	0	1
11	10787078	G	T	010000	011111	119	1	88	12	52	2	79	2	97	6	92	2	552	0	1	0	0	0	0	0	1	1	1	1	1	4	5
11	14245159	T	C	000010	000010	40	0	80	0	32	0	65	0	47	8	71	0	343	0	0	0	0	1	0	0	0	0	0	1	0	0	1
11	17770666	A	G	000011	000011	93	0	49	0	29	0	50	0	24	10	22	9	286	0	0	0	0	1	1	0	0	0	0	1	1	0	2
11	18603891	A	C	001010	101111	19	3	44	1	18	12	43	10	36	7	53	5	251	0	0	1	0	1	0	1	0	1	1	1	1	3	5
11	18672537	T	A	000011	000011	139	1	70	0	40	0	65	0	76	33	55	18	497	0	0	0	0	1	1	0	0	0	0	1	1	0	2
11	21763489	C	A	000011	000011	87	0	136	0	54	0	96	1	77	30	76	24	581	0	0	0	0	1	1	0	0	0	0	1	1	0	2
11	23393706	G	A	000100	000100	44	0	112	0	51	0	107	13	56	0	91	0	474	0	0	0	1	0	0	0	0	0	1	0	0	0	1
11	24948090	C	T	000011	000011	70	0	93	1	48	0	87	0	24	7	86	7	423	0	0	0	0	1	1	0	0	0	0	1	1	0	2
11	25792749	G	A	000011	000011	36	0	83	0	36	0	79	0	25	11	52	11	333	0	0	0	0	1	1	0	0	0	0	1	1	0	2
11	26730349	T	C	000011	000011	53	0	146	0	55	0	128	0	46	19	67	15	529	0	0	0	0	1	1	0	0	0	0	1	1	0	2
11	28882145	C	T	110101	111101	79	11	110	13	54	2	82	24	41	1	77	9	503	1	1	0	1	0	1	1	1	1	1	0	1	1	5
11	30370002	C	T	000100	000100	123	0	96	0	59	0	66	9	95	0	101	0	549	0	0	0	1	0	0	0	0	0	1	0	0	0	1
11	31273463	C	T	010000	010000	79	0	106	16	58	0	121	0	58	0	112	0	550	0	1	0	0	0	0	0	1	0	0	0	0	0	1
11	39070011	G	A	000011	000011	48	0	131	0	64	0	133	1	71	34	79	21	582	0	0	0	0	1	1	0	0	0	0	1	1	0	2
11	39165785	G	A	000011	000011	58	0	135	0	65	0	102	0	78	29	102	42	611	0	0	0	0	1	1	0	0	0	0	1	1	0	2
11	40509831	T	C	000001	100001	63	3	103	0	53	1	93	0	93	1	86	9	505	0	0	0	0	0	1	1	0	0	0	0	1	1	2
11	41813246	A	G	000011	000011	77	0	97	0	46	0	81	0	65	25	54	21	466	0	0	0	0	1	1	0	0	0	0	1	1	0	2
11	42036646	G	A	100000	110101	45	8	154	4	61	1	101	5	86	1	104	2	572	1	0	0	0	0	0	1	1	0	1	0	1	3	4
11	43137258	A	C	000100	000100	95	0	108	0	57	0	72	9	99	0	95	0	535	0	0	0	1	0	0	0	0	0	1	0	0	0	1
11	43400287	G	T	000011	000011	71	0	150	1	69	0	158	1	69	37	104	36	696	0	0	0	0	1	1	0	0	0	0	1	1	0	2
11	44581743	G	A	010000	010010	169	0	89	16	56	0	86	0	100	2	97	0	615	0	1	0	0	0	0	0	1	0	0	1	0	1	2
11	44885728	C	T	000111	110111	60	3	53	5	32	0	50	4	41	4	56	9	317	0	0	0	1	1	1	1	1	0	1	1	1	2	5
11	46821323	C	T	000011	000011	127	0	106	1	58	0	95	0	49	26	100	33	595	0	0	0	0	1	1	0	0	0	0	1	1	0	2
11	48312863	T	C	000011	000011	25	0	70	0	45	0	88	0	19	5	58	13	323	0	0	0	0	1	1	0	0	0	0	1	1	0	2
11	50174987	G	A	000100	000100	33	0	59	0	44	0	65	10	45	0	71	0	327	0	0	0	1	0	0	0	0	0	1	0	0	0	1
11	56259848	C	A	001000	011100	27	0	34	3	13	7	42	5	29	0	37	0	197	0	0	1	0	0	0	0	1	1	1	0	0	2	3
11	57559322	G	T	000011	000011	152	0	141	0	54	0	95	0	85	43	101	32	703	0	0	0	0	1	1	0	0	0	0	1	1	0	2
11	57728666	G	A	000010	000010	32	0	74	0	28	0	51	0	35	6	46	0	272	0	0	0	0	1	0	0	0	0	0	1	0	0	1
11	58891340	C	T	100000	110111	34	9	106	12	71	1	73	5	65	14	76	13	479	1	0	0	0	0	0	1	1	0	1	1	1	4	5
11	59837286	T	A	000010	000010	56	0	98	0	46	0	104	0	84	14	116	0	518	0	0	0	0	1	0	0	0	0	0	1	0	0	1
11	64821143	G	T	000011	000011	161	0	43	0	31	0	39	0	50	21	23	10	378	0	0	0	0	1	1	0	0	0	0	1	1	0	2
11	66992614	C	G	000011	000011	114	0	111	0	47	0	60	1	66	22	80	18	519	0	0	0	0	1	1	0	0	0	0	1	1	0	2
11	69456340	T	G	000011	000011	50	0	33	0	23	0	24	0	39	19	31	10	229	0	0	0	0	1	1	0	0	0	0	1	1	0	2
11	70058276	T	C	001000	101111	45	3	33	0	13	9	22	2	35	2	28	2	194	0	0	1	0	0	0	1	0	1	1	1	1	4	5
11	70372542	C	A	000011	000011	124	0	55	0	31	0	63	0	63	18	42	6	402	0	0	0	0	1	1	0	0	0	0	1	1	0	2
11	70781792	G	A	000011	000011	69	0	88	1	48	0	76	0	49	31	42	16	420	0	0	0	0	1	1	0	0	0	0	1	1	0	2
11	72483349	T	C	001000	101110	123	2	53	1	22	10	32	2	48	5	47	1	346	0	0	1	0	0	0	1	0	1	1	1	0	3	4
11	72483352	C	T	001000	111110	128	3	50	2	23	9	32	2	50	4	48	1	352	0	0	1	0	0	0	1	1	1	1	1	0	4	5
11	72483366	A	G	001000	101011	113	9	55	0	23	7	35	1	52	3	49	2	349	0	0	1	0	0	0	1	0	1	0	1	1	3	4
11	72539008	C	T	010000	010000	91	0	52	7	39	0	62	0	73	0	62	0	386	0	1	0	0	0	0	0	1	0	0	0	0	0	1
11	78695948	C	A	000011	110111	66	15	40	9	32	0	39	6	18	14	31	15	285	0	0	0	0	1	1	1	1	0	1	1	1	3	5
11	80198958	C	T	000011	000011	86	0	140	0	58	0	118	0	61	35	79	40	617	0	0	0	0	1	1	0	0	0	0	1	1	0	2
11	83283368	A	G	000011	000011	32	0	107	1	44	0	86	0	41	20	56	29	416	0	0	0	0	1	1	0	0	0	0	1	1	0	2
11	83574419	C	T	000011	000011	81	0	134	0	68	0	152	0	73	40	90	28	666	0	0	0	0	1	1	0	0	0	0	1	1	0	2
11	88570001	C	A	010010	011111	66	1	115	11	63	5	107	5	71	7	105	6	562	0	1	0	0	1	0	0	1	1	1	1	1	3	5
11	91399147	G	A	000010	000010	53	0	122	0	50	0	107	1	71	12	114	0	530	0	0	0	0	1	0	0	0	0	0	1	0	0	1
11	91399155	G	A	000010	010010	49	0	116	2	51	0	105	0	69	11	114	0	517	0	0	0	0	1	0	0	1	0	0	1	0	1	2
11	91400222	G	A	000010	000010	181	0	108	0	42	0	77	0	106	15	79	0	608	0	0	0	0	1	0	0	0	0	0	1	0	0	1
11	94716888	T	C	000011	000011	49	0	133	0	57	0	149	0	44	15	105	21	573	0	0	0	0	1	1	0	0	0	0	1	1	0	2
11	95257373	G	T	010000	010000	62	0	92	18	45	0	120	0	91	0	112	0	540	0	1	0	0	0	0	0	1	0	0	0	0	0	1
11	96760044	T	A	000100	000100	66	0	122	0	52	0	88	16	60	0	109	0	513	0	0	0	1	0	0	0	0	0	1	0	0	0	1
11	96801114	C	G	001000	001000	83	0	82	0	37	9	61	0	55	0	47	0	374	0	0	1	0	0	0	0	0	1	0	0	0	0	1
11	96842840	C	T	000011	000011	20	0	108	0	37	0	94	0	35	11	38	13	356	0	0	0	0	1	1	0	0	0	0	1	1	0	2
11	97204556	A	G	000011	000011	62	0	113	0	47	0	87	1	60	16	57	32	475	0	0	0	0	1	1	0	0	0	0	1	1	0	2
11	100950721	C	T	000100	000100	108	0	77	1	43	0	56	9	106	0	79	0	479	0	0	0	1	0	0	0	0	0	1	0	0	0	1
11	102943681	C	A	000010	000111	23	0	93	1	44	0	79	4	35	8	69	2	358	0	0	0	0	1	0	0	0	0	1	1	1	2	3
11	103569114	C	T	100000	100000	36	6	127	0	61	0	135	0	60	0	114	0	539	1	0	0	0	0	0	1	0	0	0	0	0	0	1
11	111023698	A	T	000100	000100	26	0	97	0	48	0	100	15	49	0	83	0	418	0	0	0	1	0	0	0	0	0	1	0	0	0	1
11	113249672	T	C	001000	011010	41	0	90	3	20	8	81	0	47	2	54	1	347	0	0	1	0	0	0	0	1	1	0	1	0	2	3
11	113249673	C	A	001000	011000	42	0	90	2	19	8	82	0	47	1	54	1	346	0	0	1	0	0	0	0	1	1	0	0	0	1	2
11	113748843	G	T	010000	111101	34	5	26	7	18	2	35	3	23	1	27	2	183	0	1	0	0	0	0	1	1	1	1	0	1	4	5
11	114116072	A	G	000011	000011	131	0	72	0	35	0	67	0	61	32	50	14	462	0	0	0	0	1	1	0	0	0	0	1	1	0	2
11	116682069	A	G	000001	000001	105	0	87	1	49	0	95	1	94	0	74	14	520	0	0	0	0	0	1	0	0	0	0	0	1	0	1
11	117128860	C	T	000011	001011	100	0	88	0	62	2	74	0	40	15	69	24	474	0	0	0	0	1	1	0	0	1	0	1	1	1	3
11	118113940	G	T	000011	000011	191	0	153	1	69	0	112	1	132	48	99	27	833	0	0	0	0	1	1	0	0	0	0	1	1	0	2
11	121977074	T	C	000011	000011	117	0	172	1	54	0	124	0	99	26	90	16	699	0	0	0	0	1	1	0	0	0	0	1	1	0	2
11	121995354	C	A	000001	110111	68	7	82	9	56	0	72	3	59	2	39	15	412	0	0	0	0	0	1	1	1	0	1	1	1	4	5
11	123808838	G	T	001000	001000	45	0	96	0	49	7	76	0	45	0	64	0	382	0	0	1	0	0	0	0	0	1	0	0	0	0	1
11	125159404	T	A	000011	000011	57	0	80	1	50	0	87	0	42	14	48	9	388	0	0	0	0	1	1	0	0	0	0	1	1	0	2
11	125332801	C	T	000011	000011	143	0	75	0	40	0	54	0	52	18	43	15	440	0	0	0	0	1	1	0	0	0	0	1	1	0	2
11	126977133	G	C	000011	000011	90	0	99	0	40	0	51	0	47	19	50	13	409	0	0	0	0	1	1	0	0	0	0	1	1	0	2
11	128944958	A	G	000011	000011	36	0	116	1	83	0	127	0	33	13	76	40	525	0	0	0	0	1	1	0	0	0	0	1	1	0	2
11	132156447	A	G	000010	000010	119	0	96	0	46	0	70	0	61	12	59	1	464	0	0	0	0	1	0	0	0	0	0	1	0	0	1
11	132470200	G	A	001000	001000	77	0	88	0	44	7	85	0	82	0	82	0	465	0	0	1	0	0	0	0	0	1	0	0	0	0	1
11	132559493	G	C	000010	000010	77	0	114	0	71	0	88	0	65	9	95	0	519	0	0	0	0	1	0	0	0	0	0	1	0	0	1
11	134470473	G	T	100010	111011	29	13	66	7	16	4	53	0	18	7	36	3	252	1	0	0	0	1	0	1	1	1	0	1	1	3	5
12	1051465	C	T	000011	000011	69	0	116	0	45	0	111	0	59	24	77	28	529	0	0	0	0	1	1	0	0	0	0	1	1	0	2
12	1898347	G	A	101000	111100	99	16	63	6	39	7	94	3	63	0	87	1	478	1	0	1	0	0	0	1	1	1	1	0	0	2	4
12	2120394	C	T	000011	000011	85	0	124	0	58	0	81	0	107	24	83	31	593	0	0	0	0	1	1	0	0	0	0	1	1	0	2
12	4390491	C	T	001000	001000	161	1	82	1	43	8	70	0	78	0	54	0	498	0	0	1	0	0	0	0	0	1	0	0	0	0	1
12	8548944	T	C	010001	110011	55	13	31	6	29	0	21	1	31	5	20	4	216	0	1	0	0	0	1	1	1	0	0	1	1	2	4
12	8999655	C	T	000011	010011	35	0	30	2	28	0	48	0	29	7	25	9	213	0	0	0	0	1	1	0	1	0	0	1	1	1	3
12	10473603	A	G	000011	000011	35	0	97	0	58	0	108	1	71	18	61	28	477	0	0	0	0	1	1	0	0	0	0	1	1	0	2
12	11118497	C	A	000011	000011	61	0	134	0	56	0	137	0	68	22	80	24	582	0	0	0	0	1	1	0	0	0	0	1	1	0	2
12	15922293	C	G	010000	010000	34	0	118	20	56	1	134	0	65	0	134	0	562	0	1	0	0	0	0	0	1	0	0	0	0	0	1
12	17683358	G	C	001001	001111	59	1	89	1	42	8	81	6	72	5	71	7	442	0	0	1	0	0	1	0	0	1	1	1	1	2	4
12	20781361	C	T	010000	010000	79	0	119	21	58	0	120	0	86	0	80	0	563	0	1	0	0	0	0	0	1	0	0	0	0	0	1
12	21334258	C	G	010000	010000	65	0	108	15	48	0	117	0	85	0	107	0	545	0	1	0	0	0	0	0	1	0	0	0	0	0	1
12	22510450	G	T	000011	000011	53	0	95	0	48	0	81	0	27	9	72	20	405	0	0	0	0	1	1	0	0	0	0	1	1	0	2
12	23946157	T	C	000001	000001	44	0	135	1	50	0	137	1	69	0	84	11	532	0	0	0	0	0	1	0	0	0	0	0	1	0	1
12	24583215	C	G	001000	001000	37	0	74	0	32	9	79	0	42	0	57	0	330	0	0	1	0	0	0	0	0	1	0	0	0	0	1
12	24989755	A	G	001000	001100	29	1	64	0	25	5	74	2	45	0	73	1	319	0	0	1	0	0	0	0	0	1	1	0	0	1	2
12	26770595	G	A	000010	010111	49	1	91	8	32	1	71	6	51	10	87	7	414	0	0	0	0	1	0	0	1	0	1	1	1	3	4
12	27619190	A	C	000101	110111	81	2	99	3	38	1	84	9	57	5	79	9	467	0	0	0	1	0	1	1	1	0	1	1	1	3	5
12	27972784	G	T	010000	110000	106	2	117	14	59	0	96	0	110	1	132	0	637	0	1	0	0	0	0	1	1	0	0	0	0	1	2
12	29076567	A	G	000011	000011	62	0	116	0	66	0	136	0	53	13	92	41	579	0	0	0	0	1	1	0	0	0	0	1	1	0	2
12	30101717	C	A	000011	000011	87	0	87	0	45	0	82	1	51	16	51	19	439	0	0	0	0	1	1	0	0	0	0	1	1	0	2
12	30435934	C	A	000010	000011	111	1	140	1	69	0	114	1	77	15	80	4	613	0	0	0	0	1	0	0	0	0	0	1	1	1	2
12	33654170	T	C	000011	000011	48	0	121	0	60	0	112	0	40	22	64	27	494	0	0	0	0	1	1	0	0	0	0	1	1	0	2
12	34847488	C	T	100001	101111	22	4	63	1	31	2	56	3	44	3	51	6	286	1	0	0	0	0	1	1	0	1	1	1	1	3	5
12	38238145	A	G	000100	000100	24	0	119	0	76	0	107	16	65	0	112	0	519	0	0	0	1	0	0	0	0	0	1	0	0	0	1
12	43967427	A	G	000011	000011	66	0	140	0	65	0	120	0	53	18	85	22	569	0	0	0	0	1	1	0	0	0	0	1	1	0	2
12	48808213	C	T	000011	000011	105	0	152	0	66	0	94	0	81	26	85	27	636	0	0	0	0	1	1	0	0	0	0	1	1	0	2
12	57084092	T	A	011000	111101	20	2	35	7	17	3	40	5	30	0	30	6	195	0	1	1	0	0	0	1	1	1	1	0	1	3	5
12	59884888	T	C	000011	000011	91	0	139	0	59	0	125	0	65	30	102	24	635	0	0	0	0	1	1	0	0	0	0	1	1	0	2
12	63946394	T	C	000110	110111	44	2	73	8	29	1	73	11	33	6	60	3	343	0	0	0	1	1	0	1	1	0	1	1	1	3	5
12	68170304	T	C	000010	000010	68	0	121	0	60	0	106	0	78	11	91	0	535	0	0	0	0	1	0	0	0	0	0	1	0	0	1
12	68660160	C	A	000101	010111	23	1	24	5	20	1	16	4	21	5	22	9	151	0	0	0	1	0	1	0	1	0	1	1	1	2	4
12	69397542	G	T	000010	000010	117	0	140	0	54	0	93	0	100	13	137	0	654	0	0	0	0	1	0	0	0	0	0	1	0	0	1
12	71487732	G	T	000011	000011	46	0	118	0	63	0	98	0	42	22	50	21	460	0	0	0	0	1	1	0	0	0	0	1	1	0	2
12	73233778	A	G	001000	011100	169	0	101	2	47	12	59	2	100	0	58	0	550	0	0	1	0	0	0	0	1	1	1	0	0	2	3
12	74553354	T	C	001000	001000	20	0	89	0	45	7	102	0	45	0	92	0	400	0	0	1	0	0	0	0	0	1	0	0	0	0	1
12	75604706	C	A	000011	000011	55	0	106	0	58	0	111	0	45	27	73	27	502	0	0	0	0	1	1	0	0	0	0	1	1	0	2
12	77839533	G	C	000010	000010	81	0	127	0	61	0	93	1	98	15	109	0	585	0	0	0	0	1	0	0	0	0	0	1	0	0	1
12	77955073	G	A	000011	000011	24	0	81	0	41	0	117	0	40	15	69	18	405	0	0	0	0	1	1	0	0	0	0	1	1	0	2
12	78688236	G	A	000011	000011	23	0	39	0	21	0	51	0	22	3	29	12	200	0	0	0	0	1	1	0	0	0	0	1	1	0	2
12	80523946	C	T	000011	000011	48	0	150	1	48	0	138	0	75	32	82	33	607	0	0	0	0	1	1	0	0	0	0	1	1	0	2
12	82006926	A	C	010000	010000	24	0	98	15	45	0	108	0	53	0	99	0	442	0	1	0	0	0	0	0	1	0	0	0	0	0	1
12	82994427	A	T	000011	000011	78	0	147	0	62	0	136	0	64	36	96	38	657	0	0	0	0	1	1	0	0	0	0	1	1	0	2
12	84795758	G	A	100010	110111	43	14	44	5	48	1	50	8	37	17	42	12	321	1	0	0	0	1	0	1	1	0	1	1	1	3	5
12	85571918	T	A	000011	000011	74	1	201	0	49	0	139	0	113	19	147	31	774	0	0	0	0	1	1	0	0	0	0	1	1	0	2
12	86056560	C	T	000100	000100	175	0	177	0	75	0	132	15	122	0	160	0	856	0	0	0	1	0	0	0	0	0	1	0	0	0	1
12	88318141	G	A	001000	001000	78	0	128	0	35	9	132	0	76	0	89	0	547	0	0	1	0	0	0	0	0	1	0	0	0	0	1
12	91082935	G	T	000011	000011	44	0	134	0	46	0	93	0	45	17	79	31	489	0	0	0	0	1	1	0	0	0	0	1	1	0	2
12	91555366	G	A	000010	000011	39	0	82	0	52	0	86	0	48	16	103	5	431	0	0	0	0	1	0	0	0	0	0	1	1	1	2
12	95644095	G	T	011101	011111	21	1	24	9	15	10	24	7	23	3	31	10	178	0	1	1	1	0	1	0	1	1	1	1	1	1	5
12	96041119	T	C	000011	000011	62	0	124	0	42	0	112	0	71	33	66	28	538	0	0	0	0	1	1	0	0	0	0	1	1	0	2
12	99136337	T	A	000011	000011	115	1	98	0	41	1	80	0	47	20	70	22	495	0	0	0	0	1	1	0	0	0	0	1	1	0	2
12	100200947	T	C	000011	000011	39	0	149	0	65	0	146	1	67	11	93	24	595	0	0	0	0	1	1	0	0	0	0	1	1	0	2
12	100717419	A	T	000011	000011	44	0	92	0	43	0	128	0	41	19	90	34	491	0	0	0	0	1	1	0	0	0	0	1	1	0	2
12	100877282	G	C	100010	110111	18	11	40	5	33	1	38	6	17	4	28	5	206	1	0	0	0	1	0	1	1	0	1	1	1	3	5
12	102558700	G	A	000100	000100	69	0	158	0	51	0	112	13	98	0	107	0	608	0	0	0	1	0	0	0	0	0	1	0	0	0	1
12	103368128	G	A	000100	000100	82	0	104	0	41	0	63	8	73	0	65	0	436	0	0	0	1	0	0	0	0	0	1	0	0	0	1
12	112128988	C	T	001000	001000	122	0	113	0	45	10	111	0	106	1	103	0	611	0	0	1	0	0	0	0	0	1	0	0	0	0	1
12	113708367	C	T	100000	100000	102	13	82	1	37	1	87	1	70	1	66	1	462	1	0	0	0	0	0	1	0	0	0	0	0	0	1
12	116533179	T	C	010000	010000	25	0	87	18	52	0	117	0	84	0	127	0	510	0	1	0	0	0	0	0	1	0	0	0	0	0	1
12	118224973	T	G	000011	000011	102	0	94	0	33	0	69	0	77	39	63	13	490	0	0	0	0	1	1	0	0	0	0	1	1	0	2
12	118238420	G	A	010001	110111	49	3	71	9	38	1	73	4	44	4	47	6	349	0	1	0	0	0	1	1	1	0	1	1	1	3	5
12	120875228	G	A	011011	011111	25	0	35	14	13	7	35	7	34	10	34	10	224	0	1	1	0	1	1	0	1	1	1	1	1	1	5
12	120875230	T	A	001010	011111	26	0	39	9	15	6	35	8	35	9	37	10	229	0	0	1	0	1	0	0	1	1	1	1	1	3	5
12	122018728	A	G	010000	010000	60	0	37	11	36	0	51	0	46	0	55	0	296	0	1	0	0	0	0	0	1	0	0	0	0	0	1
12	123082297	G	T	000011	000011	154	0	111	0	54	0	99	0	64	29	78	20	609	0	0	0	0	1	1	0	0	0	0	1	1	0	2
12	123315766	A	G	001000	001000	127	0	97	1	34	10	67	0	95	0	82	0	513	0	0	1	0	0	0	0	0	1	0	0	0	0	1
12	124990813	G	C	000011	000011	67	0	44	0	24	0	45	0	30	11	31	7	259	0	0	0	0	1	1	0	0	0	0	1	1	0	2
12	126492275	A	T	000100	000100	49	0	69	0	39	0	70	11	71	0	78	0	387	0	0	0	1	0	0	0	0	0	1	0	0	0	1
12	128014540	T	A	100011	110111	52	8	105	4	59	1	73	6	41	8	59	6	422	1	0	0	0	1	1	1	1	0	1	1	1	2	5
12	128014551	A	G	100010	110111	49	8	106	4	59	1	75	8	45	9	65	5	434	1	0	0	0	1	0	1	1	0	1	1	1	3	5
12	128014554	T	A	000010	110111	49	6	99	3	57	1	74	7	44	9	66	5	420	0	0	0	0	1	0	1	1	0	1	1	1	4	5
12	128404734	C	A	000011	000011	61	1	85	0	49	0	107	1	34	22	58	17	435	0	0	0	0	1	1	0	0	0	0	1	1	0	2
12	128561575	G	A	000011	010011	81	0	106	2	37	0	73	0	53	19	51	13	435	0	0	0	0	1	1	0	1	0	0	1	1	1	3
13	20421436	G	A	000011	000011	97	1	149	0	46	0	129	0	88	26	110	35	681	0	0	0	0	1	1	0	0	0	0	1	1	0	2
13	20953201	A	C	100000	110111	54	25	63	9	40	1	66	6	41	16	62	15	398	1	0	0	0	0	0	1	1	0	1	1	1	4	5
13	26099061	C	T	011001	011111	22	1	70	9	28	30	66	5	36	4	41	6	318	0	1	1	0	0	1	0	1	1	1	1	1	2	5
13	28805534	G	A	000011	010011	77	0	146	2	61	0	161	0	62	22	124	47	702	0	0	0	0	1	1	0	1	0	0	1	1	1	3
13	29488509	A	G	000011	000011	64	0	126	1	68	0	115	1	72	23	82	18	570	0	0	0	0	1	1	0	0	0	0	1	1	0	2
13	29752575	G	A	000011	000011	30	0	51	0	46	0	92	1	14	9	40	11	294	0	0	0	0	1	1	0	0	0	0	1	1	0	2
13	29923787	T	C	100001	110101	28	4	72	2	49	1	82	4	41	0	50	7	340	1	0	0	0	0	1	1	1	0	1	0	1	2	4
13	30377319	A	G	000100	000100	73	0	161	1	60	0	110	14	93	0	119	0	631	0	0	0	1	0	0	0	0	0	1	0	0	0	1
13	41555537	C	T	000100	000100	107	0	168	0	62	0	134	18	121	0	178	1	789	0	0	0	1	0	0	0	0	0	1	0	0	0	1
13	42251460	C	T	000001	000001	124	0	138	0	60	0	142	0	100	1	105	15	685	0	0	0	0	0	1	0	0	0	0	0	1	0	1
13	44609410	C	T	000010	000010	74	0	139	0	55	0	107	1	84	10	107	0	577	0	0	0	0	1	0	0	0	0	0	1	0	0	1
13	45762669	G	A	010000	010000	57	0	158	17	59	0	179	0	85	0	132	0	687	0	1	0	0	0	0	0	1	0	0	0	0	0	1
13	46123810	C	T	000100	000100	109	0	103	0	33	0	79	9	100	1	80	0	514	0	0	0	1	0	0	0	0	0	1	0	0	0	1
13	47917750	G	C	001110	011111	65	0	120	6	54	6	131	12	55	6	102	5	562	0	0	1	1	1	0	0	1	1	1	1	1	2	5
13	47917754	A	G	001110	011111	68	0	118	8	57	6	128	16	53	9	96	6	565	0	0	1	1	1	0	0	1	1	1	1	1	2	5
13	50856494	C	A	001000	001000	153	0	138	1	47	8	111	0	120	1	171	0	750	0	0	1	0	0	0	0	0	1	0	0	0	0	1
13	54413696	G	T	000011	000011	31	0	127	0	66	0	130	1	42	23	94	31	545	0	0	0	0	1	1	0	0	0	0	1	1	0	2
13	56571282	C	T	000001	000101	49	1	100	0	58	0	93	2	60	0	61	11	435	0	0	0	0	0	1	0	0	0	1	0	1	1	2
13	57375483	A	C	000011	000011	23	0	108	0	42	0	101	0	31	17	77	23	422	0	0	0	0	1	1	0	0	0	0	1	1	0	2
13	63652575	T	A	000100	000100	29	0	128	0	74	0	100	11	61	0	104	0	507	0	0	0	1	0	0	0	0	0	1	0	0	0	1
13	65630175	G	A	000100	000100	62	0	74	0	35	0	32	7	39	0	36	0	285	0	0	0	1	0	0	0	0	0	1	0	0	0	1
13	69579845	T	C	000011	000011	98	0	141	0	70	0	112	0	80	39	85	38	663	0	0	0	0	1	1	0	0	0	0	1	1	0	2
13	70638047	C	T	000011	000011	22	0	94	0	50	0	116	0	29	6	59	31	407	0	0	0	0	1	1	0	0	0	0	1	1	0	2
13	70778119	A	C	100000	110111	81	27	107	13	40	1	70	13	52	19	79	12	514	1	0	0	0	0	0	1	1	0	1	1	1	4	5
13	71424888	G	C	000100	000111	97	0	91	1	48	0	81	19	67	2	90	2	498	0	0	0	1	0	0	0	0	0	1	1	1	2	3
13	71426852	A	G	000100	000100	54	0	109	0	69	0	127	15	57	0	91	0	522	0	0	0	1	0	0	0	0	0	1	0	0	0	1
13	73125035	A	T	010110	110111	24	2	58	9	35	1	38	7	39	5	57	2	277	0	1	0	1	1	0	1	1	0	1	1	1	2	5
13	79885478	G	A	000100	000100	61	0	154	0	60	0	86	14	87	0	142	0	604	0	0	0	1	0	0	0	0	0	1	0	0	0	1
13	81061744	T	A	000011	000011	70	0	139	0	60	0	105	0	71	21	106	23	595	0	0	0	0	1	1	0	0	0	0	1	1	0	2
13	83378878	A	T	000011	000011	71	0	131	0	49	0	104	0	73	32	55	29	544	0	0	0	0	1	1	0	0	0	0	1	1	0	2
13	83900802	G	A	110000	110000	23	2	91	18	50	1	83	1	41	0	84	1	395	1	1	0	0	0	0	1	1	0	0	0	0	0	2
13	86134050	G	T	100000	100000	18	5	124	0	45	0	97	0	40	0	75	0	404	1	0	0	0	0	0	1	0	0	0	0	0	0	1
13	87985958	A	C	010000	010000	117	0	103	21	45	0	92	0	111	0	97	0	586	0	1	0	0	0	0	0	1	0	0	0	0	0	1
13	89189242	G	A	000011	000011	115	1	153	0	65	0	104	1	67	33	88	24	651	0	0	0	0	1	1	0	0	0	0	1	1	0	2
13	90893980	G	A	000011	000011	38	0	157	0	77	0	135	0	53	31	97	51	639	0	0	0	0	1	1	0	0	0	0	1	1	0	2
13	95039042	C	T	001000	001000	34	0	74	0	30	5	69	0	39	0	52	0	303	0	0	1	0	0	0	0	0	1	0	0	0	0	1
13	97250996	G	T	000011	000011	88	1	162	0	58	0	138	0	85	54	109	43	738	0	0	0	0	1	1	0	0	0	0	1	1	0	2
13	102257359	T	C	001000	101111	153	3	93	0	16	10	54	2	41	2	64	4	442	0	0	1	0	0	0	1	0	1	1	1	1	4	5
13	102257362	G	A	001000	101011	159	2	94	0	16	7	53	1	40	2	66	4	444	0	0	1	0	0	0	1	0	1	0	1	1	3	4
13	102688542	G	C	000011	000011	111	0	143	0	41	1	98	0	77	35	93	30	629	0	0	0	0	1	1	0	0	0	0	1	1	0	2
13	104712639	T	A	000011	000011	68	0	148	0	66	0	145	0	74	31	95	36	663	0	0	0	0	1	1	0	0	0	0	1	1	0	2
13	107798119	G	A	000011	000011	41	0	110	0	43	0	119	0	47	22	68	24	474	0	0	0	0	1	1	0	0	0	0	1	1	0	2
13	107835623	G	A	000011	000011	136	0	123	0	64	0	77	0	85	40	96	34	655	0	0	0	0	1	1	0	0	0	0	1	1	0	2
13	109093606	C	A	000011	000011	84	0	122	0	53	0	71	1	50	23	70	29	503	0	0	0	0	1	1	0	0	0	0	1	1	0	2
13	109862668	A	T	000011	000011	43	1	122	0	59	0	133	0	59	20	98	29	564	0	0	0	0	1	1	0	0	0	0	1	1	0	2
13	112035405	G	T	000011	000011	68	0	50	0	38	0	42	0	22	8	31	11	270	0	0	0	0	1	1	0	0	0	0	1	1	0	2
13	113116242	G	T	001000	101000	96	2	54	0	25	5	41	0	50	0	41	0	314	0	0	1	0	0	0	1	0	1	0	0	0	1	2
14	22649204	C	T	000011	000011	39	0	134	0	65	0	131	0	64	23	97	36	589	0	0	0	0	1	1	0	0	0	0	1	1	0	2
14	23023097	C	T	011110	111110	53	5	25	4	20	2	22	2	30	6	23	1	193	0	1	1	1	1	0	1	1	1	1	1	0	1	5
14	24935799	A	T	100010	110111	44	7	63	4	34	1	74	2	48	7	68	3	355	1	0	0	0	1	0	1	1	0	1	1	1	3	5
14	27740665	G	C	000100	000100	85	0	188	0	65	0	123	18	129	0	146	0	754	0	0	0	1	0	0	0	0	0	1	0	0	0	1
14	27968600	G	C	000010	000010	38	0	111	0	53	0	121	0	41	10	110	0	484	0	0	0	0	1	0	0	0	0	0	1	0	0	1
14	28099539	C	G	001000	001000	84	0	148	0	57	9	136	0	102	0	95	1	632	0	0	1	0	0	0	0	0	1	0	0	0	0	1
14	29431546	C	T	000011	010011	74	0	151	2	52	0	122	0	82	34	84	40	641	0	0	0	0	1	1	0	1	0	0	1	1	1	3
14	30520662	T	C	001000	011000	105	0	135	2	53	8	127	0	108	0	108	0	646	0	0	1	0	0	0	0	1	1	0	0	0	1	2
14	31377531	T	C	000011	000011	96	1	177	0	70	0	169	0	104	37	130	37	821	0	0	0	0	1	1	0	0	0	0	1	1	0	2
14	31952828	G	T	001000	001000	127	0	84	0	39	6	79	0	99	0	80	0	514	0	0	1	0	0	0	0	0	1	0	0	0	0	1
14	33327465	T	C	000011	000011	59	0	123	0	53	0	86	0	41	26	59	14	461	0	0	0	0	1	1	0	0	0	0	1	1	0	2
14	35103566	T	C	000011	000011	55	0	52	0	29	0	41	0	24	10	28	14	253	0	0	0	0	1	1	0	0	0	0	1	1	0	2
14	35933125	A	G	000011	000011	54	0	104	1	48	0	109	0	45	19	69	14	463	0	0	0	0	1	1	0	0	0	0	1	1	0	2
14	36845390	C	T	010000	010000	80	0	94	17	48	0	82	0	86	0	72	0	479	0	1	0	0	0	0	0	1	0	0	0	0	0	1
14	37249090	A	C	000100	000100	52	0	77	0	50	0	49	12	59	0	90	0	389	0	0	0	1	0	0	0	0	0	1	0	0	0	1
14	37720344	T	C	000011	000011	76	0	106	0	57	0	121	1	93	38	80	36	608	0	0	0	0	1	1	0	0	0	0	1	1	0	2
14	38127880	A	G	000011	000011	50	0	140	0	54	0	108	0	99	28	83	26	588	0	0	0	0	1	1	0	0	0	0	1	1	0	2
14	39808531	T	G	000011	000011	126	0	110	0	64	0	84	0	58	26	86	21	575	0	0	0	0	1	1	0	0	0	0	1	1	0	2
14	40036761	T	C	000011	000011	49	0	120	0	48	0	99	0	32	14	69	21	452	0	0	0	0	1	1	0	0	0	0	1	1	0	2
14	40632467	G	T	001000	001000	101	0	124	0	50	14	102	1	104	0	86	0	582	0	0	1	0	0	0	0	0	1	0	0	0	0	1
14	41399933	T	C	000011	000011	85	0	132	0	64	0	149	0	85	34	73	37	659	0	0	0	0	1	1	0	0	0	0	1	1	0	2
14	42691611	T	A	000011	000011	85	0	139	1	62	0	117	0	78	17	93	30	622	0	0	0	0	1	1	0	0	0	0	1	1	0	2
14	47593931	G	T	000011	100011	69	2	136	0	73	0	98	1	71	36	79	29	594	0	0	0	0	1	1	1	0	0	0	1	1	1	3
14	48150176	G	A	000011	000011	92	0	144	0	60	1	107	0	56	21	61	30	572	0	0	0	0	1	1	0	0	0	0	1	1	0	2
14	49198353	T	A	000100	000100	38	0	127	0	50	0	99	20	73	0	104	0	511	0	0	0	1	0	0	0	0	0	1	0	0	0	1
14	54532295	G	A	001000	011000	107	0	88	6	35	11	92	0	67	0	88	0	494	0	0	1	0	0	0	0	1	1	0	0	0	1	2
14	57218376	G	A	000011	000111	160	0	108	0	45	0	91	2	57	29	76	24	592	0	0	0	0	1	1	0	0	0	1	1	1	1	3
14	62769814	G	T	000011	000011	69	0	109	1	59	0	83	0	56	17	60	22	476	0	0	0	0	1	1	0	0	0	0	1	1	0	2
14	69099673	C	T	011000	011111	32	1	36	11	14	6	46	7	28	6	35	4	226	0	1	1	0	0	0	0	1	1	1	1	1	3	5
14	72675657	T	C	001000	001000	34	1	66	0	25	8	41	0	44	1	49	1	270	0	0	1	0	0	0	0	0	1	0	0	0	0	1
14	73455246	G	A	000011	000011	64	0	51	0	26	0	56	0	39	13	58	16	323	0	0	0	0	1	1	0	0	0	0	1	1	0	2
14	75678793	A	G	000011	000011	52	0	59	0	28	0	55	0	31	12	37	15	289	0	0	0	0	1	1	0	0	0	0	1	1	0	2
14	76599576	G	A	001000	001000	107	0	73	0	39	7	69	0	89	0	68	0	452	0	0	1	0	0	0	0	0	1	0	0	0	0	1
14	77290178	C	T	000011	010011	72	0	66	2	44	0	58	0	51	9	56	12	370	0	0	0	0	1	1	0	1	0	0	1	1	1	3
14	78313113	C	T	000010	000010	112	0	75	0	37	0	48	0	84	10	53	0	419	0	0	0	0	1	0	0	0	0	0	1	0	0	1
14	78750579	A	C	100001	111101	57	10	60	6	46	2	58	2	43	1	55	9	349	1	0	0	0	0	1	1	1	1	1	0	1	3	5
14	79552481	C	T	000011	000011	58	0	107	0	43	0	89	1	49	28	62	24	461	0	0	0	0	1	1	0	0	0	0	1	1	0	2
14	79806234	A	G	000010	000010	49	0	127	0	58	0	138	1	114	13	128	0	628	0	0	0	0	1	0	0	0	0	0	1	0	0	1
14	80173599	C	T	000011	000011	64	0	128	1	57	0	101	0	55	25	68	23	522	0	0	0	0	1	1	0	0	0	0	1	1	0	2
14	81423836	A	T	000011	000011	59	0	100	0	34	0	108	0	62	19	69	19	470	0	0	0	0	1	1	0	0	0	0	1	1	0	2
14	82597342	T	G	001000	011000	108	0	156	4	57	13	122	1	109	0	140	0	710	0	0	1	0	0	0	0	1	1	0	0	0	1	2
14	83795592	G	T	000011	010011	56	0	116	2	50	0	91	0	43	31	44	25	458	0	0	0	0	1	1	0	1	0	0	1	1	1	3
14	87690755	A	G	000011	010011	70	0	129	2	60	0	134	0	57	21	81	25	579	0	0	0	0	1	1	0	1	0	0	1	1	1	3
14	88852057	C	G	000011	000011	145	0	94	1	44	0	52	0	78	21	78	16	529	0	0	0	0	1	1	0	0	0	0	1	1	0	2
14	89365247	C	A	010010	110111	71	3	84	9	40	0	87	4	57	8	77	7	447	0	1	0	0	1	0	1	1	0	1	1	1	3	5
14	89365298	C	A	010010	110111	55	3	70	9	53	0	75	4	59	8	73	7	416	0	1	0	0	1	0	1	1	0	1	1	1	3	5
14	89846663	G	A	000011	000011	127	0	110	0	53	0	90	1	73	27	53	16	550	0	0	0	0	1	1	0	0	0	0	1	1	0	2
14	92825475	C	T	000011	000011	95	0	83	0	31	0	63	0	49	21	57	20	419	0	0	0	0	1	1	0	0	0	0	1	1	0	2
14	94449284	G	C	000011	000011	150	0	87	0	39	1	50	0	62	17	51	11	468	0	0	0	0	1	1	0	0	0	0	1	1	0	2
14	96067299	C	T	000011	000111	63	1	83	0	37	0	82	2	35	21	45	16	385	0	0	0	0	1	1	0	0	0	1	1	1	1	3
14	96796800	G	A	000001	000011	139	0	126	0	54	0	122	0	93	6	108	30	678	0	0	0	0	0	1	0	0	0	0	1	1	1	2
14	101280602	C	T	000011	000011	113	0	67	1	29	0	66	0	53	28	32	12	401	0	0	0	0	1	1	0	0	0	0	1	1	0	2
14	102994343	G	A	001000	001000	128	0	69	0	40	6	47	0	60	0	66	0	416	0	0	1	0	0	0	0	0	1	0	0	0	0	1
14	104504326	C	T	000010	000011	146	0	66	1	52	0	69	0	96	19	50	3	502	0	0	0	0	1	0	0	0	0	0	1	1	1	2
15	20547767	T	A	001011	011111	46	1	38	9	24	4	34	11	37	8	26	5	243	0	0	1	0	1	1	0	1	1	1	1	1	2	5
15	22365362	A	G	011111	011111	23	1	62	22	34	12	79	24	30	14	46	15	362	0	1	1	1	1	1	0	1	1	1	1	1	0	5
15	23729969	T	C	001000	001011	69	0	81	1	23	9	81	0	42	2	48	2	358	0	0	1	0	0	0	0	0	1	0	1	1	2	3
15	24322766	C	T	000011	000011	86	0	77	0	40	1	76	1	36	11	41	22	391	0	0	0	0	1	1	0	0	0	0	1	1	0	2
15	24570645	C	G	111010	111011	15	8	49	7	23	4	54	1	26	4	46	2	239	1	1	1	0	1	0	1	1	1	0	1	1	1	5
15	25161096	T	G	000010	000011	26	0	51	1	34	0	60	1	28	6	45	4	256	0	0	0	0	1	0	0	0	0	0	1	1	1	2
15	26551478	C	T	010000	010000	144	0	79	11	52	1	61	1	83	0	55	0	487	0	1	0	0	0	0	0	1	0	0	0	0	0	1
15	27581377	G	A	001001	101111	37	3	40	1	16	5	37	4	38	2	30	3	216	0	0	1	0	0	1	1	0	1	1	1	1	3	5
15	28148508	T	C	000011	000011	87	1	46	0	28	0	38	0	34	11	22	14	281	0	0	0	0	1	1	0	0	0	0	1	1	0	2
15	34949451	T	A	000011	000011	64	0	135	0	80	0	115	0	74	29	97	28	622	0	0	0	0	1	1	0	0	0	0	1	1	0	2
15	37561550	G	A	000100	000100	85	0	120	0	46	0	88	13	65	0	100	0	517	0	0	0	1	0	0	0	0	0	1	0	0	0	1
15	39814054	A	C	100000	111011	48	7	125	2	54	2	113	1	98	2	108	4	564	1	0	0	0	0	0	1	1	1	0	1	1	4	5
15	39824009	T	C	000010	000010	24	0	109	0	43	0	120	0	55	9	97	1	458	0	0	0	0	1	0	0	0	0	0	1	0	0	1
15	41606949	C	A	000100	000100	116	0	83	0	53	0	57	12	76	1	70	0	468	0	0	0	1	0	0	0	0	0	1	0	0	0	1
15	42339508	A	C	000011	000011	76	1	71	0	49	0	67	0	47	15	55	19	400	0	0	0	0	1	1	0	0	0	0	1	1	0	2
15	46462634	C	G	000001	000001	51	0	104	0	53	0	106	0	51	0	77	12	454	0	0	0	0	0	1	0	0	0	0	0	1	0	1
15	47395188	T	G	100000	100111	51	9	118	1	35	1	117	2	54	3	122	4	517	1	0	0	0	0	0	1	0	0	1	1	1	3	4
15	47395193	T	C	100000	100111	55	9	119	1	34	1	116	3	57	4	125	4	528	1	0	0	0	0	0	1	0	0	1	1	1	3	4
15	48527318	T	G	000011	000011	48	0	113	0	60	0	110	0	43	27	84	30	515	0	0	0	0	1	1	0	0	0	0	1	1	0	2
15	48683018	G	T	000011	000011	94	0	133	0	54	0	133	0	88	46	106	22	676	0	0	0	0	1	1	0	0	0	0	1	1	0	2
15	48792367	T	C	000001	000011	46	0	157	0	65	1	152	0	120	6	104	13	664	0	0	0	0	0	1	0	0	0	0	1	1	1	2
15	50024964	G	A	000011	000011	93	0	115	0	57	0	96	0	71	35	72	25	564	0	0	0	0	1	1	0	0	0	0	1	1	0	2
15	53249426	G	A	000011	000011	95	0	100	0	49	0	90	0	50	18	60	13	475	0	0	0	0	1	1	0	0	0	0	1	1	0	2
15	53298482	T	A	000011	000011	41	0	112	1	60	0	96	0	61	13	71	22	477	0	0	0	0	1	1	0	0	0	0	1	1	0	2
15	57112981	C	G	000011	000011	84	0	136	0	57	0	95	0	60	37	68	22	559	0	0	0	0	1	1	0	0	0	0	1	1	0	2
15	60443830	T	A	000011	000011	96	0	103	1	42	0	74	0	82	19	83	22	522	0	0	0	0	1	1	0	0	0	0	1	1	0	2
15	60849305	C	T	000011	000011	132	0	169	0	71	0	137	0	79	44	120	41	793	0	0	0	0	1	1	0	0	0	0	1	1	0	2
15	61359525	T	G	101010	101111	56	6	73	1	40	6	65	2	44	4	79	3	379	1	0	1	0	1	0	1	0	1	1	1	1	2	5
15	62582553	A	T	000011	000011	21	0	109	0	40	0	79	0	45	18	61	15	388	0	0	0	0	1	1	0	0	0	0	1	1	0	2
15	69339102	T	C	000011	000011	81	0	123	0	56	0	99	0	85	53	73	44	614	0	0	0	0	1	1	0	0	0	0	1	1	0	2
15	70000016	C	T	000011	000011	144	0	122	0	37	0	73	1	87	35	58	13	570	0	0	0	0	1	1	0	0	0	0	1	1	0	2
15	75059625	A	G	000100	111100	44	2	46	2	28	2	47	8	28	1	30	1	239	0	0	0	1	0	0	1	1	1	1	0	0	3	4
15	79904653	T	C	000011	000011	113	0	124	0	47	0	88	0	68	41	53	21	555	0	0	0	0	1	1	0	0	0	0	1	1	0	2
15	85499673	C	T	010000	110011	67	2	84	13	40	0	69	0	63	5	78	8	429	0	1	0	0	0	0	1	1	0	0	1	1	3	4
15	86737294	G	A	000011	000011	90	0	125	0	65	0	95	0	68	31	61	23	558	0	0	0	0	1	1	0	0	0	0	1	1	0	2
15	86923490	T	C	111010	111011	35	3	31	3	22	2	26	1	31	4	37	2	197	1	1	1	0	1	0	1	1	1	0	1	1	1	5
15	89319396	G	A	010000	010000	129	0	81	14	48	0	92	0	106	0	81	1	552	0	1	0	0	0	0	0	1	0	0	0	0	0	1
15	91308048	G	T	100011	110111	27	20	56	8	39	1	60	8	27	17	29	15	307	1	0	0	0	1	1	1	1	0	1	1	1	2	5
15	93780018	C	T	000011	000011	89	0	133	0	61	0	114	0	73	26	84	17	597	0	0	0	0	1	1	0	0	0	0	1	1	0	2
15	94001008	G	A	000011	100111	56	2	73	0	32	0	56	2	37	15	34	11	318	0	0	0	0	1	1	1	0	0	1	1	1	2	4
15	94468795	T	C	000010	000010	70	0	199	0	71	0	162	0	101	18	141	0	762	0	0	0	0	1	0	0	0	0	0	1	0	0	1
15	96727984	G	A	000010	110111	33	6	55	15	37	1	66	11	42	14	53	4	337	0	0	0	0	1	0	1	1	0	1	1	1	4	5
15	96984788	G	A	000011	000011	134	0	69	0	35	1	50	0	50	21	40	16	416	0	0	0	0	1	1	0	0	0	0	1	1	0	2
15	97027418	A	G	010000	010000	77	0	80	10	46	0	71	0	61	0	81	0	426	0	1	0	0	0	0	0	1	0	0	0	0	0	1
15	97888901	T	C	001000	001000	115	0	106	0	32	10	98	0	107	0	93	0	561	0	0	1	0	0	0	0	0	1	0	0	0	0	1
15	100352556	C	G	100001	110101	24	3	36	3	33	1	37	2	22	0	38	5	204	1	0	0	0	0	1	1	1	0	1	0	1	2	4
16	1234217	C	T	000011	000011	80	0	38	0	23	0	28	0	28	11	25	6	239	0	0	0	0	1	1	0	0	0	0	1	1	0	2
16	3809431	C	A	000011	000011	112	0	97	0	55	0	102	0	71	29	73	26	565	0	0	0	0	1	1	0	0	0	0	1	1	0	2
16	3926304	G	C	000100	000100	76	0	87	0	43	0	89	15	63	0	101	1	475	0	0	0	1	0	0	0	0	0	1	0	0	0	1
16	4045822	G	C	000011	000011	52	0	74	0	36	0	86	0	41	18	62	14	383	0	0	0	0	1	1	0	0	0	0	1	1	0	2
16	5198382	T	C	001010	111110	106	4	52	3	24	9	46	4	57	10	38	1	354	0	0	1	0	1	0	1	1	1	1	1	0	3	5
16	5696574	G	A	000011	000011	150	0	98	0	49	0	78	0	50	16	37	9	487	0	0	0	0	1	1	0	0	0	0	1	1	0	2
16	5868636	G	T	000011	000011	81	0	98	0	45	0	75	0	55	29	54	16	453	0	0	0	0	1	1	0	0	0	0	1	1	0	2
16	5965740	C	T	000011	000011	105	0	78	1	42	0	58	1	44	8	50	7	394	0	0	0	0	1	1	0	0	0	0	1	1	0	2
16	8624584	C	T	001110	101111	41	3	59	1	28	4	65	7	52	6	51	2	319	0	0	1	1	1	0	1	0	1	1	1	1	2	5
16	10450254	C	A	000011	000011	151	0	67	1	46	0	60	1	43	25	29	13	436	0	0	0	0	1	1	0	0	0	0	1	1	0	2
16	15477744	C	T	100110	110111	85	14	108	13	55	1	89	13	55	8	95	9	545	1	0	0	1	1	0	1	1	0	1	1	1	2	5
16	18999757	G	A	011000	111110	130	8	81	15	41	5	72	3	102	8	82	0	547	0	1	1	0	0	0	1	1	1	1	1	0	3	5
16	19319449	C	G	001000	001000	111	0	90	0	32	7	66	0	124	0	90	0	520	0	0	1	0	0	0	0	0	1	0	0	0	0	1
16	20043451	G	A	000011	000011	138	0	86	0	43	0	54	0	69	43	59	13	505	0	0	0	0	1	1	0	0	0	0	1	1	0	2
16	24840303	C	G	100000	110111	46	24	47	8	31	0	58	3	33	13	48	14	325	1	0	0	0	0	0	1	1	0	1	1	1	4	5
16	25676698	C	T	000100	000100	44	0	106	0	40	0	98	12	46	0	61	0	407	0	0	0	1	0	0	0	0	0	1	0	0	0	1
16	29320271	A	G	110000	111110	71	12	38	8	29	2	35	3	54	3	40	1	296	1	1	0	0	0	0	1	1	1	1	1	0	3	5
16	33580329	G	A	011101	111101	71	6	52	6	25	3	32	7	24	1	46	5	278	0	1	1	1	0	1	1	1	1	1	0	1	1	5
16	33841161	G	C	101000	111011	47	10	101	5	52	8	76	1	64	7	71	6	448	1	0	1	0	0	0	1	1	1	0	1	1	3	5
16	33937754	C	T	000111	110111	82	8	48	3	39	1	34	6	50	5	48	5	329	0	0	0	1	1	1	1	1	0	1	1	1	2	5
16	33964441	C	T	001100	111101	69	4	41	4	21	3	17	5	20	1	30	3	218	0	0	1	1	0	0	1	1	1	1	0	1	3	5
16	34983913	G	A	000011	000011	70	0	25	0	35	0	31	0	30	10	19	4	224	0	0	0	0	1	1	0	0	0	0	1	1	0	2
16	46750033	T	C	000011	000011	78	0	79	0	35	0	60	0	11	18	31	18	330	0	0	0	0	1	1	0	0	0	0	1	1	0	2
16	47933338	A	G	000011	000011	115	1	121	0	47	0	83	0	41	33	36	14	491	0	0	0	0	1	1	0	0	0	0	1	1	0	2
16	48887008	C	T	000011	000011	119	0	60	0	43	0	59	0	24	18	28	9	360	0	0	0	0	1	1	0	0	0	0	1	1	0	2
16	49154241	C	T	001000	001000	138	0	94	1	40	9	54	0	69	0	66	0	471	0	0	1	0	0	0	0	0	1	0	0	0	0	1
16	55395359	C	A	000011	000011	103	0	90	1	42	1	75	0	32	22	33	18	417	0	0	0	0	1	1	0	0	0	0	1	1	0	2
16	55457787	C	G	000011	110111	44	14	24	6	41	1	31	9	11	12	17	10	220	0	0	0	0	1	1	1	1	0	1	1	1	3	5
16	56642526	G	C	001000	001000	118	0	88	0	30	6	41	0	74	0	64	0	421	0	0	1	0	0	0	0	0	1	0	0	0	0	1
16	56907634	G	T	001000	011000	24	0	34	2	16	7	43	1	19	1	21	1	169	0	0	1	0	0	0	0	1	1	0	0	0	1	2
16	62340409	C	T	000001	000001	80	1	99	0	60	0	95	0	51	0	49	8	443	0	0	0	0	0	1	0	0	0	0	0	1	0	1
16	65535117	A	C	000100	000100	68	1	133	0	51	0	83	10	74	0	73	0	493	0	0	0	1	0	0	0	0	0	1	0	0	0	1
16	69362562	T	G	000100	000100	119	0	91	0	38	0	93	13	92	0	71	0	517	0	0	0	1	0	0	0	0	0	1	0	0	0	1
16	70868779	G	A	101100	101110	49	9	55	0	24	4	38	6	28	2	39	0	254	1	0	1	1	0	0	1	0	1	1	1	0	1	4
16	71630672	G	C	000010	000010	24	0	91	1	56	1	97	0	22	8	80	0	380	0	0	0	0	1	0	0	0	0	0	1	0	0	1
16	71630828	G	T	000010	000010	37	0	91	0	55	1	102	0	38	12	62	1	399	0	0	0	0	1	0	0	0	0	0	1	0	0	1
16	73766863	T	C	000011	000011	80	0	126	0	49	0	109	1	36	21	67	27	516	0	0	0	0	1	1	0	0	0	0	1	1	0	2
16	74250451	G	A	000010	000110	107	0	113	0	49	0	87	2	64	8	64	0	494	0	0	0	0	1	0	0	0	0	1	1	0	1	2
16	74865495	T	C	000011	000011	93	0	139	0	45	0	106	1	48	29	46	24	531	0	0	0	0	1	1	0	0	0	0	1	1	0	2
16	79002052	C	T	010000	111001	228	13	80	15	31	2	57	1	74	1	61	3	566	0	1	0	0	0	0	1	1	1	0	0	1	3	4
16	81813537	C	G	001000	101000	120	2	52	1	23	12	41	0	54	0	47	0	352	0	0	1	0	0	0	1	0	1	0	0	0	1	2
16	83369703	C	T	001000	001000	92	1	96	0	27	6	74	1	32	0	60	0	389	0	0	1	0	0	0	0	0	1	0	0	0	0	1
16	84198564	G	T	000010	110111	79	7	93	4	55	0	67	8	39	11	61	11	435	0	0	0	0	1	0	1	1	0	1	1	1	4	5
16	87047598	C	T	001000	001100	106	0	102	0	25	11	70	2	61	0	47	0	424	0	0	1	0	0	0	0	0	1	1	0	0	1	2
16	87047601	A	C	001000	101101	110	2	103	0	29	8	76	3	65	0	48	2	446	0	0	1	0	0	0	1	0	1	1	0	1	3	4
16	87398781	C	G	100011	110111	16	20	27	8	20	1	13	10	12	8	12	9	156	1	0	0	0	1	1	1	1	0	1	1	1	2	5
16	88441169	A	C	001000	111000	126	7	59	4	34	7	65	1	40	0	30	0	373	0	0	1	0	0	0	1	1	1	0	0	0	2	3
16	89721827	T	C	001000	111000	79	2	50	2	24	7	45	1	43	1	30	1	285	0	0	1	0	0	0	1	1	1	0	0	0	2	3
17	1006898	G	A	000011	000011	126	0	73	0	40	0	61	0	70	36	51	11	468	0	0	0	0	1	1	0	0	0	0	1	1	0	2
17	3872268	G	A	000011	000011	114	0	79	0	38	0	61	0	57	20	46	26	441	0	0	0	0	1	1	0	0	0	0	1	1	0	2
17	3912617	G	A	000011	000011	89	0	87	0	46	0	66	0	57	29	63	22	459	0	0	0	0	1	1	0	0	0	0	1	1	0	2
17	5435850	C	T	000011	000011	59	0	71	0	32	0	78	0	37	19	50	14	360	0	0	0	0	1	1	0	0	0	0	1	1	0	2
17	6655105	C	T	000011	000011	46	0	80	0	44	0	82	0	49	20	80	17	418	0	0	0	0	1	1	0	0	0	0	1	1	0	2
17	6883693	A	G	000011	000011	56	0	93	0	50	0	104	0	34	16	60	23	436	0	0	0	0	1	1	0	0	0	0	1	1	0	2
17	8663206	C	T	000011	000011	72	0	106	0	55	0	99	0	75	17	54	30	508	0	0	0	0	1	1	0	0	0	0	1	1	0	2
17	8883633	A	T	000011	000011	24	0	74	0	50	0	82	0	21	10	42	14	317	0	0	0	0	1	1	0	0	0	0	1	1	0	2
17	9253272	C	T	000001	110111	114	2	91	5	39	1	80	4	85	7	93	12	533	0	0	0	0	0	1	1	1	0	1	1	1	4	5
17	10958168	C	T	000010	000010	40	0	54	0	31	0	62	0	22	7	57	1	274	0	0	0	0	1	0	0	0	0	0	1	0	0	1
17	11036311	C	A	000100	000100	95	0	84	0	48	0	75	13	50	0	94	0	459	0	0	0	1	0	0	0	0	0	1	0	0	0	1
17	12197992	G	A	000110	110111	18	6	58	10	42	0	32	10	37	11	37	9	270	0	0	0	1	1	0	1	1	0	1	1	1	3	5
17	13511605	T	G	000010	000010	95	0	105	0	62	0	60	0	79	16	100	0	517	0	0	0	0	1	0	0	0	0	0	1	0	0	1
17	13919061	C	G	000010	000010	79	0	72	0	36	0	84	0	91	13	87	0	462	0	0	0	0	1	0	0	0	0	0	1	0	0	1
17	15050070	T	C	000011	000011	112	0	112	0	62	0	109	0	76	27	86	19	603	0	0	0	0	1	1	0	0	0	0	1	1	0	2
17	17127007	A	G	000011	000011	150	0	78	0	34	0	54	0	79	25	34	11	465	0	0	0	0	1	1	0	0	0	0	1	1	0	2
17	17462399	G	A	000011	000011	78	0	61	0	23	0	53	0	44	20	32	11	322	0	0	0	0	1	1	0	0	0	0	1	1	0	2
17	17844164	T	C	000011	000011	81	0	117	0	56	0	92	0	86	40	95	32	599	0	0	0	0	1	1	0	0	0	0	1	1	0	2
17	27483384	G	C	000011	000011	118	1	82	0	40	0	49	0	67	15	62	16	450	0	0	0	0	1	1	0	0	0	0	1	1	0	2
17	29009983	C	A	100000	110111	15	5	59	8	39	1	67	8	32	4	56	4	298	1	0	0	0	0	0	1	1	0	1	1	1	4	5
17	30126474	C	T	000011	000011	110	0	103	0	28	0	76	0	49	21	51	16	454	0	0	0	0	1	1	0	0	0	0	1	1	0	2
17	30215867	G	C	000011	000011	75	0	74	0	26	0	61	0	30	12	55	18	351	0	0	0	0	1	1	0	0	0	0	1	1	0	2
17	31559459	T	A	110000	110101	74	13	84	8	45	1	81	3	83	0	73	2	467	1	1	0	0	0	0	1	1	0	1	0	1	2	4
17	35201381	G	A	011111	011111	34	0	34	6	26	3	41	5	23	4	31	5	212	0	1	1	1	1	1	0	1	1	1	1	1	0	5
17	35373245	G	T	000011	000011	71	0	77	0	43	0	86	1	62	21	62	24	447	0	0	0	0	1	1	0	0	0	0	1	1	0	2
17	36063060	A	C	010000	110001	124	3	87	14	32	0	61	1	65	1	67	2	457	0	1	0	0	0	0	1	1	0	0	0	1	2	3
17	38385114	T	G	010000	010000	97	0	78	14	46	0	98	0	92	0	87	0	512	0	1	0	0	0	0	0	1	0	0	0	0	0	1
17	39325186	G	T	000011	000011	77	0	111	0	45	0	93	0	49	13	82	23	493	0	0	0	0	1	1	0	0	0	0	1	1	0	2
17	42085350	A	G	000011	000011	123	0	70	0	42	0	68	0	74	35	52	17	481	0	0	0	0	1	1	0	0	0	0	1	1	0	2
17	42308698	G	A	000011	000011	71	0	88	0	39	0	79	0	42	16	51	28	414	0	0	0	0	1	1	0	0	0	0	1	1	0	2
17	46215050	C	T	000010	000010	89	0	128	1	55	0	135	0	81	13	117	0	619	0	0	0	0	1	0	0	0	0	0	1	0	0	1
17	46239171	C	T	100001	110111	26	14	33	3	34	1	35	9	30	5	32	14	236	1	0	0	0	0	1	1	1	0	1	1	1	3	5
17	47342484	T	C	000101	010111	31	0	62	2	39	0	48	16	58	2	51	4	313	0	0	0	1	0	1	0	1	0	1	1	1	2	4
17	47342524	T	C	001000	111101	23	3	41	2	20	8	38	2	53	0	37	2	229	0	0	1	0	0	0	1	1	1	1	0	1	4	5
17	49880554	A	T	000100	000100	97	0	122	0	47	0	90	16	117	0	79	0	568	0	0	0	1	0	0	0	0	0	1	0	0	0	1
17	50254180	G	A	000011	000011	81	0	123	1	55	0	87	1	49	27	79	32	535	0	0	0	0	1	1	0	0	0	0	1	1	0	2
17	50783814	C	T	000001	000001	50	0	135	0	50	0	130	0	64	0	84	11	524	0	0	0	0	0	1	0	0	0	0	0	1	0	1
17	51109276	G	A	010000	010000	55	0	131	16	49	0	123	0	93	0	107	0	574	0	1	0	0	0	0	0	1	0	0	0	0	0	1
17	51390108	T	A	100000	110111	25	7	88	3	44	1	80	6	42	3	70	7	376	1	0	0	0	0	0	1	1	0	1	1	1	4	5
17	55965251	C	T	001000	111010	19	3	40	3	15	6	39	1	32	3	39	0	200	0	0	1	0	0	0	1	1	1	0	1	0	3	4
17	57484824	C	A	001000	111110	159	2	78	2	44	7	74	5	103	6	85	1	566	0	0	1	0	0	0	1	1	1	1	1	0	4	5
17	57484829	G	T	001000	111110	164	2	83	2	50	7	73	4	102	7	89	1	584	0	0	1	0	0	0	1	1	1	1	1	0	4	5
17	57484856	G	C	001000	111110	160	3	85	2	44	7	76	4	95	5	78	1	560	0	0	1	0	0	0	1	1	1	1	1	0	4	5
17	57484857	C	T	001000	111110	162	2	84	2	44	7	74	4	93	5	78	1	556	0	0	1	0	0	0	1	1	1	1	1	0	4	5
17	63218297	C	T	000011	000011	108	0	83	0	30	0	47	0	35	14	40	16	373	0	0	0	0	1	1	0	0	0	0	1	1	0	2
17	63944582	T	G	000010	000111	33	0	65	0	41	0	73	2	45	10	58	4	331	0	0	0	0	1	0	0	0	0	1	1	1	2	3
17	64746516	T	G	000011	000011	32	0	51	0	41	0	68	1	30	9	51	16	299	0	0	0	0	1	1	0	0	0	0	1	1	0	2
17	65816097	C	T	000100	000100	102	0	62	0	31	0	46	10	63	1	47	0	362	0	0	0	1	0	0	0	0	0	1	0	0	0	1
17	66152086	T	C	000011	000011	122	0	110	0	49	0	102	0	72	35	71	15	576	0	0	0	0	1	1	0	0	0	0	1	1	0	2
17	66218505	C	T	100010	110111	71	8	66	2	28	1	65	2	51	7	70	5	376	1	0	0	0	1	0	1	1	0	1	1	1	3	5
17	66895991	C	A	000011	000011	52	0	201	0	53	0	152	0	50	25	128	36	697	0	0	0	0	1	1	0	0	0	0	1	1	0	2
17	69082449	G	A	100000	110111	24	10	115	11	46	0	72	9	46	6	69	9	417	1	0	0	0	0	0	1	1	0	1	1	1	4	5
17	74966534	C	T	000010	001011	91	0	65	0	31	3	67	1	42	8	49	2	359	0	0	0	0	1	0	0	0	1	0	1	1	2	3
17	75342360	C	T	000101	011111	29	1	31	5	20	3	35	5	22	6	26	14	197	0	0	0	1	0	1	0	1	1	1	1	1	3	5
17	78567069	C	T	000011	000011	131	0	99	0	49	0	109	0	62	30	81	25	586	0	0	0	0	1	1	0	0	0	0	1	1	0	2
17	79272092	C	T	111000	111100	108	14	91	11	24	6	73	4	99	0	129	0	559	1	1	1	0	0	0	1	1	1	1	0	0	1	4
18	925922	A	G	001011	111011	92	2	72	5	24	6	63	1	62	13	68	10	418	0	0	1	0	1	1	1	1	1	0	1	1	2	5
18	1921854	A	G	011000	011001	31	0	44	9	12	13	62	0	19	1	33	2	226	0	1	1	0	0	0	0	1	1	0	0	1	1	3
18	2640376	C	A	000011	000011	201	0	117	1	48	0	80	1	64	19	92	18	641	0	0	0	0	1	1	0	0	0	0	1	1	0	2
18	2958139	C	A	010011	011111	25	1	32	14	18	3	33	3	24	3	38	13	207	0	1	0	0	1	1	0	1	1	1	1	1	2	5
18	3073047	G	A	010000	010000	68	0	50	10	38	1	68	0	65	0	57	0	357	0	1	0	0	0	0	0	1	0	0	0	0	0	1
18	3840716	G	A	000011	000011	94	0	132	0	52	0	131	0	102	46	98	37	692	0	0	0	0	1	1	0	0	0	0	1	1	0	2
18	5321866	G	A	001000	001000	72	0	95	0	40	7	94	0	72	0	91	0	471	0	0	1	0	0	0	0	0	1	0	0	0	0	1
18	6738588	G	A	100000	110111	13	7	72	7	57	0	58	6	39	9	63	9	340	1	0	0	0	0	0	1	1	0	1	1	1	4	5
18	8337568	G	A	000011	000011	136	0	114	0	52	0	86	0	77	29	60	16	570	0	0	0	0	1	1	0	0	0	0	1	1	0	2
18	10718758	C	A	000011	000011	57	0	59	0	38	0	54	0	29	12	43	14	306	0	0	0	0	1	1	0	0	0	0	1	1	0	2
18	10738023	C	T	000011	010011	92	0	104	2	62	0	101	0	64	18	93	34	570	0	0	0	0	1	1	0	1	0	0	1	1	1	3
18	12089008	C	A	001010	111011	144	2	54	3	30	5	35	1	45	5	33	2	359	0	0	1	0	1	0	1	1	1	0	1	1	3	5
18	12089010	G	A	001000	111011	141	2	52	3	28	5	36	1	48	4	33	2	355	0	0	1	0	0	0	1	1	1	0	1	1	4	5
18	21593516	G	C	000011	000011	20	0	123	0	50	0	107	0	41	9	71	22	443	0	0	0	0	1	1	0	0	0	0	1	1	0	2
18	21980813	T	C	000011	000011	95	0	130	1	59	0	100	0	88	44	93	28	638	0	0	0	0	1	1	0	0	0	0	1	1	0	2
18	22780237	G	C	001000	011000	62	0	128	2	60	10	128	0	68	0	125	0	583	0	0	1	0	0	0	0	1	1	0	0	0	1	2
18	24499645	C	G	000011	000011	53	0	109	0	41	0	105	0	55	32	56	28	479	0	0	0	0	1	1	0	0	0	0	1	1	0	2
18	28952630	T	G	000100	000110	84	0	119	1	40	0	97	14	74	2	98	0	529	0	0	0	1	0	0	0	0	0	1	1	0	1	2
18	31374549	C	T	000100	000100	98	0	84	0	44	0	49	9	95	0	70	0	449	0	0	0	1	0	0	0	0	0	1	0	0	0	1
18	33095927	C	G	000011	000011	54	0	77	0	49	0	77	0	68	32	63	19	439	0	0	0	0	1	1	0	0	0	0	1	1	0	2
18	37427940	C	A	000011	000111	74	0	141	0	52	0	150	2	62	19	85	31	616	0	0	0	0	1	1	0	0	0	1	1	1	1	3
18	39772089	G	A	000011	000011	40	0	119	0	59	0	109	0	31	19	77	22	476	0	0	0	0	1	1	0	0	0	0	1	1	0	2
18	42382281	A	T	000011	000011	84	0	156	0	61	1	111	0	102	62	114	42	733	0	0	0	0	1	1	0	0	0	0	1	1	0	2
18	44415699	T	C	000011	000011	26	0	128	0	62	0	124	0	63	22	99	35	559	0	0	0	0	1	1	0	0	0	0	1	1	0	2
18	44516218	A	T	000011	000011	25	0	93	0	43	0	86	0	28	8	47	27	357	0	0	0	0	1	1	0	0	0	0	1	1	0	2
18	51371899	T	A	000011	000011	116	0	127	1	61	0	90	0	72	20	91	20	598	0	0	0	0	1	1	0	0	0	0	1	1	0	2
18	53243370	G	T	000011	000011	29	0	130	0	62	0	140	1	75	25	108	34	604	0	0	0	0	1	1	0	0	0	0	1	1	0	2
18	54365334	G	A	000001	000001	76	0	86	0	61	0	67	0	53	0	65	15	423	0	0	0	0	0	1	0	0	0	0	0	1	0	1
18	57866067	T	C	000010	000010	32	0	123	0	57	0	116	0	67	12	101	0	508	0	0	0	0	1	0	0	0	0	0	1	0	0	1
18	62649610	T	G	000011	000011	39	0	135	0	45	0	131	0	53	32	93	34	562	0	0	0	0	1	1	0	0	0	0	1	1	0	2
18	64017149	A	C	000011	000011	63	0	132	0	45	0	147	0	57	31	84	27	586	0	0	0	0	1	1	0	0	0	0	1	1	0	2
18	64966678	A	G	001000	001000	111	0	57	0	17	12	41	0	58	0	44	0	340	0	0	1	0	0	0	0	0	1	0	0	0	0	1
18	66113023	G	A	000011	000011	111	0	107	1	47	0	82	0	56	21	69	14	508	0	0	0	0	1	1	0	0	0	0	1	1	0	2
18	66428094	C	T	000010	000010	112	0	144	0	44	0	110	0	117	16	124	0	667	0	0	0	0	1	0	0	0	0	0	1	0	0	1
18	68336646	C	A	000011	000011	210	0	90	0	34	0	47	0	59	22	32	13	507	0	0	0	0	1	1	0	0	0	0	1	1	0	2
18	69604436	C	A	000011	010011	20	0	108	4	52	0	103	0	35	19	78	24	443	0	0	0	0	1	1	0	1	0	0	1	1	1	3
18	69770338	T	C	000011	000011	66	0	139	0	64	0	111	0	78	25	81	32	596	0	0	0	0	1	1	0	0	0	0	1	1	0	2
18	70536599	G	A	000011	000011	62	0	29	0	22	0	27	0	23	6	17	3	189	0	0	0	0	1	1	0	0	0	0	1	1	0	2
18	70587404	G	A	000011	000111	130	0	118	0	42	0	69	2	72	20	61	23	537	0	0	0	0	1	1	0	0	0	1	1	1	1	3
18	74535741	C	T	000011	100011	85	2	51	0	32	0	57	0	71	26	48	14	386	0	0	0	0	1	1	1	0	0	0	1	1	1	3
18	75773782	C	T	001000	001000	84	0	67	0	34	7	64	0	59	0	57	0	372	0	0	1	0	0	0	0	0	1	0	0	0	0	1
18	75796776	G	A	000011	000011	36	0	66	0	32	0	95	0	17	9	42	15	312	0	0	0	0	1	1	0	0	0	0	1	1	0	2
18	75842974	G	A	000011	000011	114	1	46	0	35	0	63	0	38	11	37	12	357	0	0	0	0	1	1	0	0	0	0	1	1	0	2
18	76693515	G	T	000011	000011	70	0	63	0	38	0	58	1	44	18	43	18	353	0	0	0	0	1	1	0	0	0	0	1	1	0	2
18	76760080	C	G	000011	000011	54	0	66	1	53	0	95	0	50	21	49	19	408	0	0	0	0	1	1	0	0	0	0	1	1	0	2
19	1861252	C	A	000011	000011	80	1	67	0	31	0	47	0	39	16	38	13	332	0	0	0	0	1	1	0	0	0	0	1	1	0	2
19	3104324	T	A	000011	000011	81	0	60	0	22	0	38	0	37	20	27	10	295	0	0	0	0	1	1	0	0	0	0	1	1	0	2
19	6704032	T	C	000010	000010	87	0	55	0	29	0	67	1	36	7	51	0	333	0	0	0	0	1	0	0	0	0	0	1	0	0	1
19	8377047	C	A	000011	000011	120	1	60	1	33	0	63	0	58	31	41	15	423	0	0	0	0	1	1	0	0	0	0	1	1	0	2
19	9840982	C	T	010000	010000	147	0	61	9	39	0	63	0	74	0	54	0	447	0	1	0	0	0	0	0	1	0	0	0	0	0	1
19	11313966	A	T	001000	001000	72	0	38	0	20	7	49	1	67	0	62	0	316	0	0	1	0	0	0	0	0	1	0	0	0	0	1
19	11421937	G	A	100000	100011	106	15	85	1	34	1	49	1	84	2	47	2	427	1	0	0	0	0	0	1	0	0	0	1	1	2	3
19	14334397	C	T	000011	000011	85	1	59	0	30	0	66	0	29	13	48	15	346	0	0	0	0	1	1	0	0	0	0	1	1	0	2
19	14817152	C	T	000011	000011	96	1	48	0	44	0	50	1	46	18	30	9	343	0	0	0	0	1	1	0	0	0	0	1	1	0	2
19	15976768	A	G	000011	000011	117	0	109	0	44	0	67	0	70	44	76	22	549	0	0	0	0	1	1	0	0	0	0	1	1	0	2
19	16460500	C	T	000011	000011	97	0	76	0	39	0	70	0	54	18	56	20	430	0	0	0	0	1	1	0	0	0	0	1	1	0	2
19	16493199	A	T	000011	000011	69	0	78	0	30	0	79	0	61	29	78	13	437	0	0	0	0	1	1	0	0	0	0	1	1	0	2
19	16931632	A	T	100000	111001	42	8	84	3	44	3	75	1	40	1	62	2	365	1	0	0	0	0	0	1	1	1	0	0	1	3	4
19	18352652	G	A	000011	000011	88	0	70	0	44	0	59	0	50	18	44	13	386	0	0	0	0	1	1	0	0	0	0	1	1	0	2
19	19041273	A	T	000001	110011	48	4	50	2	28	0	44	1	28	4	22	7	238	0	0	0	0	0	1	1	1	0	0	1	1	3	4
19	19041275	T	A	000001	110011	47	5	49	2	29	0	40	1	30	3	22	8	236	0	0	0	0	0	1	1	1	0	0	1	1	3	4
19	31000948	A	G	000011	000011	52	0	99	0	42	0	94	0	50	21	60	26	444	0	0	0	0	1	1	0	0	0	0	1	1	0	2
19	31936222	G	A	000011	000011	63	0	101	0	61	0	103	0	65	38	76	19	526	0	0	0	0	1	1	0	0	0	0	1	1	0	2
19	32920413	C	G	000011	000111	80	0	125	0	63	0	152	2	76	26	87	34	645	0	0	0	0	1	1	0	0	0	1	1	1	1	3
19	32995883	T	C	000011	000011	87	1	84	1	42	0	63	1	30	13	74	29	425	0	0	0	0	1	1	0	0	0	0	1	1	0	2
19	34351959	G	A	000011	000011	58	0	71	0	42	0	63	0	34	12	37	8	325	0	0	0	0	1	1	0	0	0	0	1	1	0	2
19	40950123	G	A	010000	110000	85	2	48	9	28	0	42	0	71	0	42	0	327	0	1	0	0	0	0	1	1	0	0	0	0	1	2
19	44413704	G	A	000011	000011	120	0	149	0	63	0	95	0	78	29	90	23	647	0	0	0	0	1	1	0	0	0	0	1	1	0	2
19	45859701	G	T	000011	000011	82	0	56	0	33	0	57	0	48	22	44	10	352	0	0	0	0	1	1	0	0	0	0	1	1	0	2
19	51328753	G	T	000100	000100	69	0	66	0	25	0	38	9	59	0	51	0	317	0	0	0	1	0	0	0	0	0	1	0	0	0	1
19	57038094	A	G	000011	000011	129	1	90	0	62	0	71	0	80	23	49	27	532	0	0	0	0	1	1	0	0	0	0	1	1	0	2
20	1795737	G	A	011110	111110	51	8	47	10	15	7	32	5	44	8	28	1	256	0	1	1	1	1	0	1	1	1	1	1	0	1	5
20	4727722	G	T	000011	000011	153	0	90	0	43	0	82	0	68	32	81	19	568	0	0	0	0	1	1	0	0	0	0	1	1	0	2
20	6821811	A	G	010000	010000	57	0	83	18	35	0	68	0	69	0	71	0	401	0	1	0	0	0	0	0	1	0	0	0	0	0	1
20	7136556	C	T	000011	000011	113	0	155	0	56	0	117	0	87	40	91	32	691	0	0	0	0	1	1	0	0	0	0	1	1	0	2
20	8660023	G	T	000011	000011	96	0	150	1	57	0	109	0	79	34	93	20	639	0	0	0	0	1	1	0	0	0	0	1	1	0	2
20	10876744	C	T	000011	000011	122	0	132	0	56	0	89	0	76	40	79	23	617	0	0	0	0	1	1	0	0	0	0	1	1	0	2
20	15502089	G	A	000010	000010	40	0	113	0	58	0	116	1	52	8	110	0	498	0	0	0	0	1	0	0	0	0	0	1	0	0	1
20	16105556	C	A	000011	000011	98	0	136	1	52	1	105	1	78	34	71	21	598	0	0	0	0	1	1	0	0	0	0	1	1	0	2
20	20174742	G	T	000100	000100	33	0	88	0	43	0	108	17	59	0	95	0	443	0	0	0	1	0	0	0	0	0	1	0	0	0	1
20	35840420	C	A	000011	000011	101	0	106	0	50	0	90	0	56	30	72	21	526	0	0	0	0	1	1	0	0	0	0	1	1	0	2
20	36808154	A	C	000010	000010	117	0	83	0	47	0	74	0	87	10	71	0	489	0	0	0	0	1	0	0	0	0	0	1	0	0	1
20	39126239	A	G	000011	000011	63	0	56	0	27	0	55	0	27	16	27	9	280	0	0	0	0	1	1	0	0	0	0	1	1	0	2
20	39572872	C	T	000100	100100	121	2	99	1	45	0	80	11	97	0	90	0	546	0	0	0	1	0	0	1	0	0	1	0	0	1	2
20	39710956	C	G	010000	010000	141	0	152	21	55	0	143	0	127	0	145	0	784	0	1	0	0	0	0	0	1	0	0	0	0	0	1
20	40518753	C	T	010000	010000	83	0	61	17	38	0	70	1	83	0	68	0	421	0	1	0	0	0	0	0	1	0	0	0	0	0	1
20	43549981	G	T	000011	000011	91	0	63	0	25	0	46	0	47	16	49	8	345	0	0	0	0	1	1	0	0	0	0	1	1	0	2
20	45251903	C	T	001000	011000	68	0	122	2	45	7	111	0	70	0	93	0	518	0	0	1	0	0	0	0	1	1	0	0	0	1	2
20	46753241	A	G	110110	110111	104	17	76	12	32	1	55	9	78	13	59	5	461	1	1	0	1	1	0	1	1	0	1	1	1	1	5
20	47482220	C	T	000010	000010	78	0	84	0	47	0	76	0	109	12	100	0	506	0	0	0	0	1	0	0	0	0	0	1	0	0	1
20	53287781	C	A	000011	000011	58	0	106	0	42	0	81	0	59	15	50	17	428	0	0	0	0	1	1	0	0	0	0	1	1	0	2
20	53436373	A	G	000011	110111	32	2	26	2	26	0	27	2	19	6	29	4	175	0	0	0	0	1	1	1	1	0	1	1	1	3	5
20	53436396	A	T	010111	010111	23	1	25	2	21	0	24	2	17	5	26	6	152	0	1	0	1	1	1	0	1	0	1	1	1	0	4
20	53871690	T	A	000010	000010	105	0	87	0	37	0	66	0	47	9	73	0	424	0	0	0	0	1	0	0	0	0	0	1	0	0	1
20	54193185	G	T	000011	100011	78	2	125	0	55	0	107	0	50	18	86	18	539	0	0	0	0	1	1	1	0	0	0	1	1	1	3
20	56097693	C	T	000010	110111	68	8	70	7	34	0	52	6	44	12	43	8	352	0	0	0	0	1	0	1	1	0	1	1	1	4	5
20	58085422	T	C	000011	000011	48	0	78	0	48	0	63	0	21	7	46	10	321	0	0	0	0	1	1	0	0	0	0	1	1	0	2
20	58889840	T	A	111110	111110	59	13	47	12	20	5	39	9	57	11	36	1	309	1	1	1	1	1	0	1	1	1	1	1	0	0	5
20	59298459	T	C	000011	000011	88	0	86	0	50	0	77	0	42	16	56	27	442	0	0	0	0	1	1	0	0	0	0	1	1	0	2
20	59455025	C	G	000011	000011	89	1	105	0	36	0	77	0	47	18	55	16	444	0	0	0	0	1	1	0	0	0	0	1	1	0	2
20	59508820	G	A	000011	000011	97	1	75	0	42	0	64	0	48	22	36	8	393	0	0	0	0	1	1	0	0	0	0	1	1	0	2
20	60438671	G	A	000010	000010	87	0	56	0	29	0	36	0	18	8	20	1	255	0	0	0	0	1	0	0	0	0	0	1	0	0	1
20	61067901	C	T	000001	000001	69	0	37	0	22	0	27	0	38	0	28	5	226	0	0	0	0	0	1	0	0	0	0	0	1	0	1
20	61087395	G	A	000011	000011	77	1	27	0	24	0	32	0	24	13	16	5	219	0	0	0	0	1	1	0	0	0	0	1	1	0	2
21	9826977	G	A	110110	111110	99	4	93	2	63	3	105	4	75	3	69	0	520	1	1	0	1	1	0	1	1	1	1	1	0	1	5
21	17626130	G	T	000011	000011	74	0	135	0	56	0	103	0	71	12	85	20	556	0	0	0	0	1	1	0	0	0	0	1	1	0	2
21	18024627	G	A	000100	000100	56	0	127	0	43	0	99	12	87	0	94	0	518	0	0	0	1	0	0	0	0	0	1	0	0	0	1
21	18931164	G	A	000010	010011	84	0	157	3	57	0	110	0	127	22	101	2	663	0	0	0	0	1	0	0	1	0	0	1	1	2	3
21	21884156	C	T	000011	000011	112	0	106	0	45	0	74	0	67	28	77	25	534	0	0	0	0	1	1	0	0	0	0	1	1	0	2
21	22435819	A	G	000011	000011	94	0	105	1	55	0	98	0	53	18	97	31	552	0	0	0	0	1	1	0	0	0	0	1	1	0	2
21	24637445	T	C	000010	000010	27	0	133	0	45	0	130	0	47	11	87	1	481	0	0	0	0	1	0	0	0	0	0	1	0	0	1
21	25608200	C	A	000001	000001	61	0	129	0	63	0	133	1	76	0	97	17	577	0	0	0	0	0	1	0	0	0	0	0	1	0	1
21	25873645	A	T	000100	000100	66	0	143	0	64	0	105	15	96	0	120	0	609	0	0	0	1	0	0	0	0	0	1	0	0	0	1
21	25873646	C	T	000100	000100	67	0	144	1	63	0	108	13	99	0	121	0	616	0	0	0	1	0	0	0	0	0	1	0	0	0	1
21	27813175	T	C	010000	010000	67	0	75	13	45	0	87	0	70	0	77	0	434	0	1	0	0	0	0	0	1	0	0	0	0	0	1
21	28307326	G	A	000011	000011	75	0	94	0	47	1	81	0	46	24	53	22	443	0	0	0	0	1	1	0	0	0	0	1	1	0	2
21	32074617	G	A	000001	000001	58	0	138	0	49	0	114	0	88	0	90	12	549	0	0	0	0	0	1	0	0	0	0	0	1	0	1
21	32083516	G	A	000011	000011	67	0	110	0	49	0	76	1	43	31	74	27	478	0	0	0	0	1	1	0	0	0	0	1	1	0	2
21	32541634	C	A	000011	000011	23	0	66	0	39	0	63	0	26	5	44	6	272	0	0	0	0	1	1	0	0	0	0	1	1	0	2
21	35230068	G	A	000011	000011	112	0	76	0	52	0	78	1	67	21	54	16	477	0	0	0	0	1	1	0	0	0	0	1	1	0	2
21	40303393	C	T	000011	000011	66	0	128	0	43	0	94	0	88	32	75	13	539	0	0	0	0	1	1	0	0	0	0	1	1	0	2
21	41689239	G	T	000010	000010	117	0	132	1	62	1	103	0	93	12	86	0	607	0	0	0	0	1	0	0	0	0	0	1	0	0	1
21	41876627	A	G	010000	010000	54	0	79	14	58	0	71	0	76	0	62	0	414	0	1	0	0	0	0	0	1	0	0	0	0	0	1
21	42135055	A	C	000011	000011	65	0	95	0	68	0	110	0	57	19	56	28	498	0	0	0	0	1	1	0	0	0	0	1	1	0	2
21	42676405	G	A	000011	000011	94	0	66	0	23	0	32	0	39	20	25	9	308	0	0	0	0	1	1	0	0	0	0	1	1	0	2
21	42913154	T	C	000011	000011	34	0	79	0	42	0	109	0	38	19	65	26	412	0	0	0	0	1	1	0	0	0	0	1	1	0	2
21	45327612	C	A	000011	000011	109	0	71	1	49	0	74	0	62	16	44	16	442	0	0	0	0	1	1	0	0	0	0	1	1	0	2
21	45613925	C	T	000011	000011	109	0	72	1	42	0	69	1	65	34	65	25	483	0	0	0	0	1	1	0	0	0	0	1	1	0	2
21	45715051	C	T	000011	000011	102	0	30	0	29	0	33	0	32	12	23	9	270	0	0	0	0	1	1	0	0	0	0	1	1	0	2
22	17400319	G	C	000011	110111	48	9	65	6	48	1	48	5	39	13	42	8	332	0	0	0	0	1	1	1	1	0	1	1	1	3	5
22	20716179	C	G	001000	101000	147	4	26	0	14	6	29	0	27	0	19	1	273	0	0	1	0	0	0	1	0	1	0	0	0	1	2
22	21937759	C	T	000010	000011	139	0	118	0	44	0	84	0	97	22	92	3	599	0	0	0	0	1	0	0	0	0	0	1	1	1	2
22	24999521	C	T	100001	110111	93	15	60	5	38	1	37	2	60	8	43	8	370	1	0	0	0	0	1	1	1	0	1	1	1	3	5
22	25153075	G	A	001000	111101	23	2	54	6	13	7	32	8	28	1	42	7	223	0	0	1	0	0	0	1	1	1	1	0	1	4	5
22	25521342	A	G	000011	000011	80	0	86	1	60	0	94	0	74	30	51	21	497	0	0	0	0	1	1	0	0	0	0	1	1	0	2
22	27522859	T	G	000011	000011	38	0	75	0	52	0	110	0	32	21	71	17	416	0	0	0	0	1	1	0	0	0	0	1	1	0	2
22	30926118	C	T	010000	010000	57	0	47	9	36	0	59	0	41	0	59	0	308	0	1	0	0	0	0	0	1	0	0	0	0	0	1
22	31413645	C	T	001000	001000	53	0	122	0	49	12	100	0	87	0	68	1	492	0	0	1	0	0	0	0	0	1	0	0	0	0	1
22	34621169	T	A	000011	000011	121	0	106	0	40	0	79	0	82	37	57	18	540	0	0	0	0	1	1	0	0	0	0	1	1	0	2
22	37470030	C	A	000011	000011	110	0	52	0	28	0	66	0	44	25	34	12	371	0	0	0	0	1	1	0	0	0	0	1	1	0	2
22	37686877	C	G	000001	110011	168	9	61	5	26	0	36	0	66	12	37	11	431	0	0	0	0	0	1	1	1	0	0	1	1	3	4
22	39161787	T	C	000011	000011	146	0	61	0	35	0	35	0	55	26	34	17	409	0	0	0	0	1	1	0	0	0	0	1	1	0	2
22	41880707	C	T	010000	011000	55	0	66	18	47	2	102	1	56	0	95	0	442	0	1	0	0	0	0	0	1	1	0	0	0	1	2
22	44383629	T	C	000100	000100	61	0	86	0	45	0	78	12	73	0	75	0	430	0	0	0	1	0	0	0	0	0	1	0	0	0	1
22	45883615	G	C	000011	000011	60	0	97	0	53	1	116	0	51	11	69	25	483	0	0	0	0	1	1	0	0	0	0	1	1	0	2
22	46520940	G	A	000010	000010	68	0	49	0	42	0	49	0	37	8	55	0	308	0	0	0	0	1	0	0	0	0	0	1	0	0	1
22	47698460	T	C	000011	110011	80	10	32	4	20	1	37	1	45	8	30	8	276	0	0	0	0	1	1	1	1	0	0	1	1	2	4
22	48468603	G	A	000011	100011	46	2	40	1	24	0	36	0	34	15	24	7	229	0	0	0	0	1	1	1	0	0	0	1	1	1	3
22	48517107	A	C	000011	000011	102	0	86	0	36	0	86	0	35	16	50	19	430	0	0	0	0	1	1	0	0	0	0	1	1	0	2
22	49801620	A	G	111011	111011	50	12	29	4	15	6	19	1	19	13	20	7	195	1	1	1	0	1	1	1	1	1	0	1	1	0	5
22	49801623	A	C	111011	111011	49	13	29	4	17	6	19	1	19	14	20	7	198	1	1	1	0	1	1	1	1	1	0	1	1	0	5
22	50956047	A	G	000011	000011	115	0	48	1	28	0	45	0	41	24	24	6	332	0	0	0	0	1	1	0	0	0	0	1	1	0	2
X	2864439	A	G	110010	111110	27	7	36	5	23	2	28	4	25	7	34	1	199	1	1	0	0	1	0	1	1	1	1	1	0	2	5
X	2864441	A	C	100010	111110	27	7	41	4	27	2	29	4	27	7	36	1	212	1	0	0	0	1	0	1	1	1	1	1	0	3	5
X	2874319	C	T	000011	000011	126	0	87	0	35	0	69	0	57	29	42	12	457	0	0	0	0	1	1	0	0	0	0	1	1	0	2
X	2995211	G	T	000010	000010	97	1	106	1	50	0	71	1	71	14	71	0	483	0	0	0	0	1	0	0	0	0	0	1	0	0	1
X	4276276	G	A	000011	000011	84	1	62	0	37	0	55	1	27	11	47	17	342	0	0	0	0	1	1	0	0	0	0	1	1	0	2
X	4633356	T	C	101001	101111	30	3	34	1	18	3	41	2	32	3	20	5	192	1	0	1	0	0	1	1	0	1	1	1	1	2	5
X	5412138	G	A	001000	001000	108	0	136	0	62	9	109	0	129	0	126	0	679	0	0	1	0	0	0	0	0	1	0	0	0	0	1
X	5420334	G	A	100000	110111	25	10	57	11	39	1	51	6	36	9	42	11	298	1	0	0	0	0	0	1	1	0	1	1	1	4	5
X	5631976	T	A	001000	011010	29	0	54	2	17	6	36	1	29	3	42	0	219	0	0	1	0	0	0	0	1	1	0	1	0	2	3
X	8806959	C	T	000010	000010	73	0	81	0	47	0	65	0	49	10	83	0	408	0	0	0	0	1	0	0	0	0	0	1	0	0	1
X	11478117	A	C	000100	000100	118	0	167	1	49	0	97	15	131	0	117	0	695	0	0	0	1	0	0	0	0	0	1	0	0	0	1
X	11732544	C	A	010000	010000	60	0	124	16	50	1	119	0	106	0	103	0	579	0	1	0	0	0	0	0	1	0	0	0	0	0	1
X	12110528	C	A	000010	000011	104	0	143	0	54	0	88	0	89	12	87	3	580	0	0	0	0	1	0	0	0	0	0	1	1	1	2
X	14511812	C	T	100001	111101	16	8	53	5	32	3	60	5	22	0	53	6	263	1	0	0	0	0	1	1	1	1	1	0	1	3	5
X	15349823	C	T	000010	010010	152	0	152	2	61	0	103	0	150	24	89	0	733	0	0	0	0	1	0	0	1	0	0	1	0	1	2
X	16023448	A	G	000011	000011	92	0	113	0	66	0	88	1	48	22	79	30	539	0	0	0	0	1	1	0	0	0	0	1	1	0	2
X	21806658	G	T	100111	110111	25	12	66	18	30	1	42	20	18	15	43	11	301	1	0	0	1	1	1	1	1	0	1	1	1	1	5
X	23952172	C	A	000011	000011	94	0	95	1	42	0	78	1	57	20	66	17	471	0	0	0	0	1	1	0	0	0	0	1	1	0	2
X	24587073	C	T	001000	001000	54	0	85	0	38	7	82	0	53	0	58	0	377	0	0	1	0	0	0	0	0	1	0	0	0	0	1
X	25878181	C	G	001000	001000	79	0	151	0	64	12	93	0	122	0	114	0	635	0	0	1	0	0	0	0	0	1	0	0	0	0	1
X	25915105	A	C	000001	000001	76	0	85	0	41	1	93	0	72	0	81	12	461	0	0	0	0	0	1	0	0	0	0	0	1	0	1
X	28036704	T	A	000001	000001	69	0	145	0	53	0	108	1	59	0	68	13	516	0	0	0	0	0	1	0	0	0	0	0	1	0	1
X	28238235	C	A	000011	000011	57	0	133	0	54	0	107	0	45	12	87	23	518	0	0	0	0	1	1	0	0	0	0	1	1	0	2
X	28284784	G	A	001000	011001	45	1	111	3	36	8	79	1	31	0	60	3	378	0	0	1	0	0	0	0	1	1	0	0	1	2	3
X	28369893	T	A	010000	010001	50	1	109	19	53	0	98	0	55	0	98	2	485	0	1	0	0	0	0	0	1	0	0	0	1	1	2
X	28819080	C	A	000011	000011	56	0	49	0	20	0	43	0	25	14	34	12	253	0	0	0	0	1	1	0	0	0	0	1	1	0	2
X	29156323	C	T	000011	000011	24	0	89	0	46	0	105	0	37	11	67	13	392	0	0	0	0	1	1	0	0	0	0	1	1	0	2
X	31140130	A	T	000010	000010	86	0	154	0	58	0	135	0	90	11	123	0	657	0	0	0	0	1	0	0	0	0	0	1	0	0	1
X	31561110	C	T	100001	110111	39	14	35	6	32	0	26	3	25	10	22	15	227	1	0	0	0	0	1	1	1	0	1	1	1	3	5
X	31782055	C	A	000011	000011	56	0	87	0	44	0	65	1	36	19	59	19	386	0	0	0	0	1	1	0	0	0	0	1	1	0	2
X	32225118	A	G	000011	000011	51	0	135	0	71	0	100	0	41	26	57	23	504	0	0	0	0	1	1	0	0	0	0	1	1	0	2
X	32454925	C	T	000100	000100	162	0	132	0	54	0	75	10	81	0	103	0	617	0	0	0	1	0	0	0	0	0	1	0	0	0	1
X	34415522	C	T	000010	000010	43	0	116	0	43	0	108	0	63	9	103	0	485	0	0	0	0	1	0	0	0	0	0	1	0	0	1
X	35142516	G	A	000010	000010	33	0	110	0	52	0	93	1	37	6	79	1	412	0	0	0	0	1	0	0	0	0	0	1	0	0	1
X	35705171	C	G	000010	000011	110	0	120	0	71	0	89	1	58	12	71	3	535	0	0	0	0	1	0	0	0	0	0	1	1	1	2
X	38081284	C	T	000011	000011	80	0	79	0	50	0	48	0	58	14	36	15	380	0	0	0	0	1	1	0	0	0	0	1	1	0	2
X	40170922	C	A	000011	000011	141	1	96	0	40	1	53	0	70	21	52	11	486	0	0	0	0	1	1	0	0	0	0	1	1	0	2
X	43267989	G	T	000011	000011	95	0	113	1	61	0	102	0	74	28	58	29	561	0	0	0	0	1	1	0	0	0	0	1	1	0	2
X	43886652	C	T	001000	001000	94	0	128	1	42	10	122	0	113	1	139	0	650	0	0	1	0	0	0	0	0	1	0	0	0	0	1
X	46680936	A	G	100000	110111	36	6	69	3	51	1	93	2	62	5	78	3	409	1	0	0	0	0	0	1	1	0	1	1	1	4	5
X	47657497	C	T	000100	000100	123	0	133	1	47	0	65	12	104	0	109	0	594	0	0	0	1	0	0	0	0	0	1	0	0	0	1
X	48335233	G	T	000011	000011	119	0	69	0	40	0	81	0	34	31	40	24	438	0	0	0	0	1	1	0	0	0	0	1	1	0	2
X	49966856	G	A	000011	000011	92	0	96	1	49	1	86	0	54	26	63	25	493	0	0	0	0	1	1	0	0	0	0	1	1	0	2
X	50332748	C	T	001000	001000	90	0	155	0	38	7	118	0	119	0	127	0	654	0	0	1	0	0	0	0	0	1	0	0	0	0	1
X	50624916	T	C	100011	110111	13	11	37	13	22	1	32	4	19	23	18	6	199	1	0	0	0	1	1	1	1	0	1	1	1	2	5
X	50833581	T	C	000011	000011	69	0	117	0	41	0	88	0	50	22	57	16	460	0	0	0	0	1	1	0	0	0	0	1	1	0	2
X	51245693	G	A	000011	000011	88	0	98	0	56	0	87	0	53	30	62	20	494	0	0	0	0	1	1	0	0	0	0	1	1	0	2
X	53618971	T	C	010000	010000	40	0	100	22	50	0	109	0	87	0	116	0	524	0	1	0	0	0	0	0	1	0	0	0	0	0	1
X	63657541	A	G	001000	001000	79	0	96	0	32	11	89	0	54	0	75	0	436	0	0	1	0	0	0	0	0	1	0	0	0	0	1
X	65747050	C	T	001000	011001	27	0	75	3	36	7	72	0	41	1	75	2	339	0	0	1	0	0	0	0	1	1	0	0	1	2	3
X	66017697	G	T	011000	111101	21	2	82	14	24	10	92	8	51	1	61	7	373	0	1	1	0	0	0	1	1	1	1	0	1	3	5
X	66443322	C	A	000011	000011	111	1	74	0	57	0	54	0	25	13	48	21	404	0	0	0	0	1	1	0	0	0	0	1	1	0	2
X	68058822	G	A	000011	000011	112	0	74	0	35	0	54	0	58	23	39	12	407	0	0	0	0	1	1	0	0	0	0	1	1	0	2
X	69156072	C	A	100011	110111	29	6	58	12	30	0	53	4	48	13	39	14	306	1	0	0	0	1	1	1	1	0	1	1	1	2	5
X	70257255	A	T	000011	000011	107	0	125	0	60	0	116	0	56	19	71	20	574	0	0	0	0	1	1	0	0	0	0	1	1	0	2
X	70299792	G	A	000011	000011	70	0	64	0	44	0	70	0	36	14	46	15	359	0	0	0	0	1	1	0	0	0	0	1	1	0	2
X	72747570	C	T	000011	000011	96	1	42	0	36	0	44	0	35	15	42	9	320	0	0	0	0	1	1	0	0	0	0	1	1	0	2
X	74349699	C	A	000101	110111	65	9	62	10	52	0	57	12	42	4	39	18	370	0	0	0	1	0	1	1	1	0	1	1	1	3	5
X	74681166	C	T	000100	000100	61	0	90	0	60	1	94	12	54	0	87	1	460	0	0	0	1	0	0	0	0	0	1	0	0	0	1
X	75640585	G	C	001000	101000	37	4	45	0	30	6	40	1	38	1	43	1	246	0	0	1	0	0	0	1	0	1	0	0	0	1	2
X	75640610	G	C	001000	101000	41	2	34	0	22	6	35	0	28	0	33	1	202	0	0	1	0	0	0	1	0	1	0	0	0	1	2
X	76044377	G	C	001010	011010	40	0	69	2	14	12	66	0	26	4	56	1	290	0	0	1	0	1	0	0	1	1	0	1	0	1	3
X	77635044	C	T	000011	000011	93	0	135	1	63	0	127	0	80	50	111	45	705	0	0	0	0	1	1	0	0	0	0	1	1	0	2
X	78483884	G	C	000011	000011	101	0	135	1	61	0	95	1	55	25	95	23	592	0	0	0	0	1	1	0	0	0	0	1	1	0	2
X	79125938	G	A	001000	011000	65	1	126	3	67	11	122	0	108	0	114	0	617	0	0	1	0	0	0	0	1	1	0	0	0	1	2
X	79839135	C	A	000011	000011	41	0	98	0	46	0	92	0	51	13	67	18	426	0	0	0	0	1	1	0	0	0	0	1	1	0	2
X	80324684	A	C	010101	110111	36	11	60	16	43	1	37	20	48	12	37	18	339	0	1	0	1	0	1	1	1	0	1	1	1	2	5
X	80578346	G	A	000011	000011	44	0	141	0	63	0	137	1	49	14	98	29	576	0	0	0	0	1	1	0	0	0	0	1	1	0	2
X	80578347	A	T	000011	000011	43	0	140	0	64	0	139	0	51	13	100	27	577	0	0	0	0	1	1	0	0	0	0	1	1	0	2
X	81010270	C	T	000011	000011	95	0	121	0	48	0	70	0	74	19	62	15	504	0	0	0	0	1	1	0	0	0	0	1	1	0	2
X	83359301	A	C	000010	000010	41	0	162	0	67	0	139	0	68	12	135	0	624	0	0	0	0	1	0	0	0	0	0	1	0	0	1
X	83489494	C	A	000011	000011	39	0	156	1	70	0	124	0	65	21	84	21	581	0	0	0	0	1	1	0	0	0	0	1	1	0	2
X	84173952	A	T	000011	000011	48	0	124	0	42	1	112	0	55	14	66	23	485	0	0	0	0	1	1	0	0	0	0	1	1	0	2
X	84189409	G	A	001000	001000	99	0	59	1	22	6	21	0	59	0	29	0	296	0	0	1	0	0	0	0	0	1	0	0	0	0	1
X	85835217	C	A	000011	000011	82	0	156	1	68	0	123	0	56	24	89	23	622	0	0	0	0	1	1	0	0	0	0	1	1	0	2
X	88216063	C	T	001000	001110	125	0	123	1	50	12	98	2	94	2	110	0	617	0	0	1	0	0	0	0	0	1	1	1	0	2	3
X	90140962	C	A	000011	000011	39	0	114	1	59	0	120	0	56	23	80	8	500	0	0	0	0	1	1	0	0	0	0	1	1	0	2
X	94723262	A	G	010000	010000	136	0	143	20	68	0	130	1	102	0	130	0	730	0	1	0	0	0	0	0	1	0	0	0	0	0	1
X	96094697	C	T	001000	001000	23	0	82	0	32	6	76	0	47	0	66	0	332	0	0	1	0	0	0	0	0	1	0	0	0	0	1
X	96944848	T	C	000011	000011	23	0	75	0	42	0	82	1	32	10	55	14	334	0	0	0	0	1	1	0	0	0	0	1	1	0	2
X	97051254	G	A	001000	001000	26	0	86	0	43	10	81	0	61	0	77	0	384	0	0	1	0	0	0	0	0	1	0	0	0	0	1
X	98351190	C	A	000011	000011	111	0	110	0	53	0	79	0	67	30	71	23	544	0	0	0	0	1	1	0	0	0	0	1	1	0	2
X	98751742	G	T	000011	100011	114	2	156	0	67	0	110	0	89	28	62	25	653	0	0	0	0	1	1	1	0	0	0	1	1	1	3
X	102116424	G	A	000011	000011	81	0	97	0	43	0	69	0	48	23	70	24	455	0	0	0	0	1	1	0	0	0	0	1	1	0	2
X	103441333	C	T	000011	000011	75	0	122	1	46	0	97	0	51	33	102	26	553	0	0	0	0	1	1	0	0	0	0	1	1	0	2
X	104280145	G	A	000011	000011	87	0	158	0	52	0	85	0	69	31	81	23	586	0	0	0	0	1	1	0	0	0	0	1	1	0	2
X	105360301	C	T	001000	011000	80	0	106	4	43	9	101	0	92	0	96	0	531	0	0	1	0	0	0	0	1	1	0	0	0	1	2
X	106941350	T	C	000100	000100	138	1	121	0	46	0	77	10	95	0	104	0	592	0	0	0	1	0	0	0	0	0	1	0	0	0	1
X	108102987	C	T	000100	000110	62	0	78	0	46	0	68	16	61	2	66	0	399	0	0	0	1	0	0	0	0	0	1	1	0	1	2
X	110573798	A	G	000011	000011	51	1	122	0	56	0	101	0	55	30	85	26	527	0	0	0	0	1	1	0	0	0	0	1	1	0	2
X	112032866	C	A	000010	000010	103	0	122	0	48	0	90	0	88	14	89	0	554	0	0	0	0	1	0	0	0	0	0	1	0	0	1
X	112146952	G	A	000011	000011	82	0	125	0	60	0	123	0	87	35	84	27	623	0	0	0	0	1	1	0	0	0	0	1	1	0	2
X	112302881	C	A	010000	010000	60	1	141	24	45	0	135	0	73	0	119	0	598	0	1	0	0	0	0	0	1	0	0	0	0	0	1
X	113581663	G	A	100000	100000	29	9	109	1	65	0	100	0	68	0	81	1	463	1	0	0	0	0	0	1	0	0	0	0	0	0	1
X	113640257	C	G	001000	001000	58	0	119	1	48	7	115	0	59	0	96	0	503	0	0	1	0	0	0	0	0	1	0	0	0	0	1
X	116048500	G	A	000110	010110	74	0	63	4	22	0	30	7	20	2	51	0	273	0	0	0	1	1	0	0	1	0	1	1	0	1	3
X	116559177	G	A	001100	011101	23	1	79	3	30	5	50	5	26	0	64	2	288	0	0	1	1	0	0	0	1	1	1	0	1	2	4
X	119281795	A	G	000100	000100	105	0	93	0	43	0	67	14	85	0	84	0	491	0	0	0	1	0	0	0	0	0	1	0	0	0	1
X	119475283	G	T	000011	000011	127	1	115	1	53	1	90	0	80	35	75	27	605	0	0	0	0	1	1	0	0	0	0	1	1	0	2
X	119557982	C	T	000011	000011	112	0	92	0	46	0	65	0	37	18	60	15	445	0	0	0	0	1	1	0	0	0	0	1	1	0	2
X	119576749	G	T	000011	000011	81	0	143	0	71	0	130	0	109	29	97	24	684	0	0	0	0	1	1	0	0	0	0	1	1	0	2
X	120480504	G	A	000011	000011	95	0	91	0	53	0	91	0	59	11	54	19	473	0	0	0	0	1	1	0	0	0	0	1	1	0	2
X	120985631	T	C	001000	001000	25	0	92	1	27	8	74	0	51	0	67	0	345	0	0	1	0	0	0	0	0	1	0	0	0	0	1
X	122301747	G	A	001000	001000	48	0	136	1	41	10	100	0	80	0	89	0	505	0	0	1	0	0	0	0	0	1	0	0	0	0	1
X	122960207	C	T	001000	101101	87	2	57	0	34	6	53	2	63	1	53	3	361	0	0	1	0	0	0	1	0	1	1	0	1	3	4
X	123219549	T	C	000011	000011	160	0	109	0	55	0	91	0	63	32	79	27	616	0	0	0	0	1	1	0	0	0	0	1	1	0	2
X	123771230	G	A	001000	011000	129	0	117	2	66	8	72	0	105	1	97	0	597	0	0	1	0	0	0	0	1	1	0	0	0	1	2
X	124284651	C	A	000010	000010	36	1	104	0	50	1	92	0	49	8	78	0	419	0	0	0	0	1	0	0	0	0	0	1	0	0	1
X	124572486	G	A	010000	010000	64	0	94	14	36	0	86	0	62	0	74	0	430	0	1	0	0	0	0	0	1	0	0	0	0	0	1
X	125455599	A	G	001000	001000	48	0	117	0	44	8	127	0	54	0	85	1	484	0	0	1	0	0	0	0	0	1	0	0	0	0	1
X	127692798	C	T	000011	000011	56	0	108	1	53	0	96	0	68	21	60	16	479	0	0	0	0	1	1	0	0	0	0	1	1	0	2
X	127749044	A	C	000011	000011	70	0	127	0	66	0	129	0	87	23	85	22	609	0	0	0	0	1	1	0	0	0	0	1	1	0	2
X	129386834	C	A	001000	001000	128	0	97	0	49	9	95	0	83	0	86	0	547	0	0	1	0	0	0	0	0	1	0	0	0	0	1
X	129396197	A	G	000011	000011	63	0	90	0	60	0	91	0	59	18	67	12	460	0	0	0	0	1	1	0	0	0	0	1	1	0	2
X	131988819	C	G	000011	000011	39	0	109	0	60	0	104	0	50	26	62	34	484	0	0	0	0	1	1	0	0	0	0	1	1	0	2
X	132997080	C	G	000010	000010	115	0	106	0	59	0	114	0	94	15	101	0	604	0	0	0	0	1	0	0	0	0	0	1	0	0	1
X	134027329	G	A	001000	011100	28	0	95	2	41	8	120	2	47	0	112	0	455	0	0	1	0	0	0	0	1	1	1	0	0	2	3
X	135154265	G	A	000011	000011	103	0	84	0	37	0	69	0	46	14	56	19	428	0	0	0	0	1	1	0	0	0	0	1	1	0	2
X	136497079	C	G	000010	000010	37	0	95	0	51	0	113	0	42	8	96	0	442	0	0	0	0	1	0	0	0	0	0	1	0	0	1
X	136673238	G	C	000001	000001	72	1	62	1	56	0	80	0	59	0	64	9	404	0	0	0	0	0	1	0	0	0	0	0	1	0	1
X	138234313	G	C	000001	000001	62	0	100	0	38	0	97	0	62	0	81	11	451	0	0	0	0	0	1	0	0	0	0	0	1	0	1
X	142141735	A	G	000100	000100	138	0	107	1	49	1	69	12	146	0	73	0	596	0	0	0	1	0	0	0	0	0	1	0	0	0	1
X	144805276	C	A	000011	000011	121	0	111	0	56	0	79	0	42	19	60	19	507	0	0	0	0	1	1	0	0	0	0	1	1	0	2
X	145766765	G	A	000011	000011	25	0	80	0	52	0	105	0	27	14	48	12	363	0	0	0	0	1	1	0	0	0	0	1	1	0	2
X	145904586	C	T	001000	011000	33	0	44	3	19	7	36	1	22	0	29	0	194	0	0	1	0	0	0	0	1	1	0	0	0	1	2
X	146296182	C	A	000011	001011	66	0	79	1	40	2	82	1	41	11	48	19	390	0	0	0	0	1	1	0	0	1	0	1	1	1	3
X	146583776	G	T	000011	000011	67	0	114	0	54	0	100	0	50	17	54	22	478	0	0	0	0	1	1	0	0	0	0	1	1	0	2
X	149273097	T	C	001000	011000	83	0	79	3	29	10	85	0	105	0	86	0	480	0	0	1	0	0	0	0	1	1	0	0	0	1	2
X	149775332	T	G	001100	101101	22	3	27	1	19	2	27	5	38	0	23	2	169	0	0	1	1	0	0	1	0	1	1	0	1	2	4
X	150167765	A	G	000011	000011	82	0	84	0	46	0	83	0	63	21	53	13	445	0	0	0	0	1	1	0	0	0	0	1	1	0	2
X	150321704	G	A	001000	001000	103	0	87	1	30	9	87	0	95	0	57	0	469	0	0	1	0	0	0	0	0	1	0	0	0	0	1
X	150683772	T	G	100101	110111	41	10	30	3	24	1	25	4	42	3	21	4	208	1	0	0	1	0	1	1	1	0	1	1	1	2	5

## Sheet: P2
#CHR	POS	REF	ALT	GATK	Rescue	Normal ref	Normal alt	CCL ref	CCL alt	DCIS ref	DCIS alt	IDC ref	IDC alt	Total Coverage
1	3093273	T	C	0001	0001	41	1	29	0	20	1	38	7	137
1	5055545	G	T	0010	0110	55	0	55	4	42	9	52	0	217
1	12913617	G	C	0010	0010	20	0	30	1	21	5	39	0	116
1	15202068	A	T	0111	0111	30	0	27	10	14	6	18	8	113
1	15290815	G	A	0001	0001	64	0	48	0	38	0	37	9	196
1	15872902	G	A	0111	0111	61	0	35	11	37	6	52	17	219
1	18355620	G	T	0010	0010	46	0	40	1	22	7	27	0	143
1	21759798	G	A	0011	0011	45	0	43	1	36	4	37	7	173
1	21759800	G	C	0011	0011	44	0	42	1	34	4	38	6	169
1	24583847	G	A	0111	0111	51	0	30	15	20	7	24	28	175
1	25895776	T	C	0111	0111	43	0	45	6	26	8	31	31	190
1	28564416	A	T	0111	0111	67	0	50	18	44	17	40	45	281
1	30498210	C	T	0001	0001	46	0	38	1	31	0	40	15	171
1	33548348	C	T	0001	0001	55	0	48	0	27	0	41	15	186
1	37394597	C	A	0001	0101	62	0	41	2	48	0	32	17	202
1	40508151	C	T	0110	0110	55	0	60	12	29	7	60	0	223
1	40508161	C	T	0110	0110	60	0	59	12	33	6	64	0	234
1	43814247	G	T	0111	0111	48	0	20	6	18	7	14	32	145
1	45627726	A	G	0111	0111	60	0	43	19	32	7	32	13	206
1	46186528	A	G	0010	0010	63	0	76	0	55	8	73	0	275
1	46272526	G	A	0111	0111	51	0	36	6	25	7	29	24	178
1	47119023	G	T	0001	0101	61	0	49	3	55	1	37	32	238
1	48430443	T	C	0111	0111	59	0	18	11	24	12	22	10	156
1	51091307	T	C	0010	0010	65	0	74	0	69	11	51	0	270
1	51731579	A	C	0001	0001	45	1	34	1	32	0	27	15	155
1	53129495	G	A	0111	0111	85	0	57	18	51	26	36	25	298
1	53640095	C	T	0111	0111	35	0	31	7	17	3	13	11	117
1	56409997	G	A	0111	0111	54	0	37	17	49	15	33	11	216
1	60301517	C	A	0111	0111	27	1	28	9	29	7	27	18	146
1	61697650	T	G	0111	0111	87	0	43	19	38	10	40	19	256
1	61725187	C	G	0001	0001	65	0	70	0	59	1	36	16	247
1	62560974	C	A	0001	0001	69	0	57	0	48	0	50	20	244
1	64594621	G	A	0010	0010	70	0	56	0	47	8	39	1	221
1	67106769	G	A	0001	0111	76	0	77	5	55	3	51	13	280
1	67578279	A	G	0010	0110	49	0	53	3	31	12	50	0	198
1	69099051	G	T	0110	0110	34	0	47	11	38	10	64	0	204
1	69766838	G	A	0101	0101	36	0	57	6	46	0	15	22	182
1	69828203	C	T	0001	0001	55	0	47	0	52	0	39	11	204
1	70083601	A	G	0111	0111	43	0	34	17	33	13	16	19	175
1	74230054	G	A	0001	0001	50	0	86	0	54	0	55	15	260
1	75130473	C	T	0001	0101	52	0	73	3	55	0	30	17	230
1	79158217	T	A	0111	0111	60	0	32	18	52	14	33	16	225
1	85749209	C	A	0111	0111	57	0	25	6	22	3	18	19	150
1	86137806	G	T	0001	0001	42	0	83	0	48	0	50	8	231
1	86616764	G	T	0110	0110	53	0	62	13	37	9	69	0	243
1	90041888	C	A	0011	0011	63	0	59	1	49	5	16	20	213
1	93308329	G	A	0101	0111	67	0	64	7	57	3	30	16	244
1	94010144	A	G	0111	0111	50	0	52	17	42	14	45	15	235
1	96407764	G	A	0011	0111	41	0	36	2	24	3	33	5	144
1	96407779	T	C	0011	0111	44	0	36	2	24	3	29	6	144
1	96407801	C	T	0011	0111	43	0	33	3	27	3	32	5	146
1	97948855	G	A	0001	0001	81	1	75	0	43	0	35	9	244
1	102829255	A	C	0101	0101	34	0	48	7	23	0	19	27	158
1	105527413	T	C	0001	0001	70	0	85	0	68	0	72	15	310
1	106013645	T	A	0111	0111	28	0	37	15	22	10	18	7	137
1	107495628	T	A	0111	0111	47	0	48	8	24	12	41	8	188
1	107511467	T	G	0110	0110	58	0	66	14	37	8	52	0	235
1	107621708	T	A	0111	0111	30	0	39	16	32	10	20	17	164
1	111471446	A	C	0001	0011	52	0	58	0	43	2	30	14	199
1	116681728	C	A	0111	0111	37	0	27	5	17	13	24	7	130
1	152457063	C	G	0001	0111	58	0	94	6	53	4	34	34	283
1	154431837	A	G	0111	0111	51	0	61	12	56	6	70	12	268
1	154983917	C	T	0111	0111	38	0	33	10	26	3	39	18	167
1	157783305	A	G	0001	0111	34	0	88	3	69	2	66	30	292
1	158461058	G	A	0001	0001	49	0	90	0	77	0	85	13	314
1	160762844	G	A	0011	0011	22	0	33	1	27	3	52	11	149
1	160933526	C	T	0110	0110	57	0	57	10	74	12	84	0	294
1	164545308	A	T	0001	0001	48	0	76	1	53	0	55	14	247
1	164944651	G	A	0111	0111	47	0	66	12	56	10	67	8	266
1	165875274	G	T	0001	0001	35	1	59	1	58	0	68	15	237
1	167111012	C	T	0001	0001	49	0	74	1	73	0	63	16	276
1	167165677	T	A	0001	0001	59	0	102	0	87	0	81	10	339
1	174058384	C	T	0001	0001	40	0	88	0	62	1	81	20	292
1	174573380	C	T	0111	0111	48	0	64	12	46	7	68	6	251
1	178615473	C	T	0001	0001	41	0	76	0	61	1	64	16	259
1	182944095	G	C	0011	0111	76	0	102	5	64	9	55	48	359
1	188949498	G	A	0010	0010	27	0	66	0	37	7	74	1	212
1	190068093	G	A	0111	0111	46	0	37	8	23	10	48	16	188
1	190791705	A	G	0001	0001	27	0	68	0	36	0	44	8	183
1	190833518	C	T	0001	0001	28	0	62	1	36	0	58	9	194
1	191664709	G	A	0001	0001	65	0	99	1	76	0	83	12	336
1	192598077	C	A	0001	0101	60	0	77	3	94	0	73	25	332
1	193557246	T	C	0011	0111	36	1	62	5	43	7	58	7	219
1	194242966	G	A	0111	0111	53	0	47	53	36	48	30	78	345
1	198263162	C	T	0111	0111	46	0	99	12	62	9	88	19	335
1	198684516	C	T	0001	0101	39	0	65	4	60	1	65	12	246
1	200448284	C	T	0001	0001	32	0	33	0	26	0	52	9	152
1	202473475	C	T	0001	0001	55	0	62	0	68	0	95	15	295
1	203610764	A	C	0111	0111	45	0	67	13	65	12	78	14	294
1	203610778	C	G	0111	0111	52	0	71	10	56	13	78	15	295
1	204397179	G	C	0111	0111	64	0	58	29	62	24	48	44	329
1	204941691	G	C	0011	0111	59	0	74	7	43	8	98	10	299
1	208197108	A	T	0110	0110	49	0	49	7	60	8	73	0	246
1	209155049	T	G	0001	0001	34	0	70	0	53	0	58	10	225
1	222565101	G	A	0001	0001	42	0	42	0	42	0	47	7	180
1	223223381	T	C	0111	0111	25	0	28	9	17	4	31	4	118
1	224915196	G	A	0001	0001	59	0	73	0	52	0	66	12	262
1	228464992	C	T	0001	0001	34	0	34	1	23	0	35	15	142
1	236847911	C	T	0001	0001	39	0	84	0	45	0	64	9	241
1	236901040	A	C	0001	0001	36	0	52	0	52	1	50	14	205
1	237079511	C	A	0001	0011	38	0	85	0	67	2	69	18	279
1	237196585	G	A	0001	0001	46	0	58	0	70	0	76	11	261
1	238686599	T	A	0001	0001	47	0	68	0	68	0	83	18	284
1	240185075	C	T	0001	0001	48	0	94	0	68	0	69	12	291
1	241411077	A	G	0001	0001	49	0	87	0	90	0	75	11	312
1	243016361	C	A	0010	0010	75	0	97	0	78	15	100	0	365
1	249110556	G	A	0001	0001	48	0	57	1	54	0	59	13	232
2	1502599	G	A	0111	0111	50	0	25	13	31	10	20	10	159
2	3814997	C	A	0110	0110	43	0	36	14	36	7	43	0	179
2	4111117	A	G	0011	0111	33	0	35	2	28	3	19	9	129
2	12780222	A	G	0010	0010	52	0	32	1	15	10	28	1	139
2	13122470	G	A	0111	0111	72	0	57	15	39	18	33	20	254
2	16043785	C	T	0111	0111	25	0	30	7	15	5	29	9	120
2	17363947	T	C	0011	0111	54	0	94	6	66	10	30	34	294
2	17623847	T	C	0111	0111	35	0	42	12	29	11	21	24	174
2	21612623	T	C	0001	0101	53	0	73	6	52	0	36	12	232
2	23718217	G	A	0111	0111	36	0	31	10	17	8	12	9	123
2	28470047	C	A	0110	0110	58	0	47	13	31	4	59	0	212
2	29442987	G	T	0111	0111	56	1	34	4	40	4	27	4	170
2	29858853	G	A	0010	0010	73	0	70	1	35	7	49	0	235
2	30295442	G	T	0110	0110	36	0	26	7	32	7	32	0	140
2	31643197	G	A	0001	0001	43	0	47	0	32	0	24	13	159
2	33782269	G	A	0111	0111	34	0	35	7	27	9	19	15	146
2	33782280	T	G	0111	0111	43	0	41	9	29	11	20	15	168
2	34413778	G	C	0110	0110	52	0	54	10	45	6	32	0	199
2	41132719	C	T	0001	0001	38	0	72	0	49	0	48	10	217
2	41186403	A	G	0001	0101	66	0	70	3	75	1	40	7	262
2	41404829	A	G	0001	0101	60	0	70	2	45	1	20	26	224
2	46436649	C	T	0010	0010	72	1	60	0	46	7	57	0	243
2	50266483	G	A	0101	0111	36	0	42	7	26	2	42	6	161
2	50266503	C	T	0101	0111	37	0	49	7	30	2	41	6	172
2	51352067	C	T	0111	0111	50	0	61	22	36	11	19	22	221
2	58830670	C	T	0001	0001	38	0	42	0	42	0	34	11	167
2	61772658	C	T	0001	0001	31	0	44	0	34	0	31	7	147
2	66196829	C	G	0001	0001	44	0	39	0	31	0	28	6	148
2	66477530	C	T	0010	0010	55	0	68	0	33	6	44	0	206
2	69690133	A	C	0111	0111	75	0	49	22	52	17	40	12	267
2	69833280	T	A	0111	0111	71	0	42	17	46	19	30	21	246
2	70676984	C	T	0110	0111	48	0	30	8	21	7	32	3	149
2	71575302	C	T	0110	0110	87	0	67	15	53	7	55	0	284
2	71575656	G	A	0110	0110	67	0	63	9	49	7	71	0	266
2	72275208	G	A	0110	0110	31	0	41	6	20	6	28	0	132
2	72384756	T	A	0111	0111	44	0	29	9	23	13	10	12	140
2	72472922	T	A	0111	0111	63	0	53	18	34	16	33	29	246
2	72551486	G	T	0111	0111	35	1	35	16	22	12	15	20	156
2	72820744	C	T	0111	0111	44	0	53	21	27	12	26	10	193
2	73156548	C	G	0111	0111	41	0	34	11	20	6	24	12	148
2	73819846	A	G	0010	0110	47	0	53	7	43	10	46	0	206
2	74895601	T	A	0001	0001	47	0	60	0	51	0	48	9	215
2	77075485	A	G	0101	0101	32	0	73	9	41	0	24	34	213
2	78384498	C	T	0101	0111	51	0	26	3	34	3	26	12	155
2	78694130	C	T	0001	0111	29	0	70	4	37	3	30	15	188
2	78837281	G	T	0001	0001	48	0	61	0	55	0	39	13	216
2	78946485	G	A	0110	0110	43	0	63	10	44	5	51	0	216
2	79597972	C	A	0001	0001	44	0	48	0	43	0	33	11	179
2	80923149	G	A	0111	0111	38	0	45	6	34	14	36	10	183
2	83210386	C	T	0010	0010	30	0	37	1	19	4	38	0	129
2	83210399	C	T	0010	0010	28	0	37	1	23	4	34	0	127
2	83210412	C	G	0010	0010	29	0	43	0	20	4	38	0	134
2	83714823	C	T	0111	0111	53	0	39	15	45	13	32	7	204
2	86063622	T	A	0001	0001	54	0	65	0	59	0	41	11	230
2	99433117	T	G	0111	0111	60	0	40	17	38	9	36	16	216
2	100621247	A	G	0111	0111	48	0	43	20	24	15	35	33	218
2	102291372	T	C	0111	0111	64	0	43	13	45	13	28	28	234
2	103834992	G	A	0100	0100	72	0	57	8	47	0	45	0	229
2	103836105	T	G	0001	0001	55	0	77	0	59	1	51	11	254
2	104622490	G	A	0001	0111	39	0	39	2	32	2	32	7	153
2	112392205	T	C	0111	0111	50	0	46	8	27	11	26	36	204
2	112868457	C	T	0001	0001	63	0	57	0	47	0	41	20	228
2	114644397	G	A	0001	0001	97	0	62	0	66	0	51	14	290
2	115667397	G	A	0001	0001	46	0	62	1	53	0	41	13	216
2	117825084	T	A	0111	0111	44	0	45	15	32	6	33	15	190
2	119439300	G	T	0111	0111	28	0	37	8	20	10	24	12	139
2	120339693	G	A	0001	0001	26	0	69	0	32	0	47	11	185
2	122823033	T	C	0011	0111	57	1	75	2	49	7	15	32	238
2	123210040	C	G	0001	0001	36	0	53	0	37	0	26	6	158
2	123869142	T	C	0001	0001	53	0	76	0	55	0	63	11	258
2	124771840	C	G	0011	0111	67	0	79	7	47	7	43	10	260
2	124924102	G	C	0111	0111	48	0	39	9	31	4	37	11	179
2	125210616	T	A	0111	0111	47	0	60	21	44	22	21	21	236
2	125377186	C	A	0111	0111	22	0	23	7	22	4	14	6	98
2	126343784	C	A	0111	0111	54	0	41	14	35	14	21	29	208
2	133034721	C	T	0111	0111	22	1	35	4	14	3	22	6	107
2	136839340	G	A	0111	0111	41	0	22	12	25	4	27	6	137
2	137771698	C	A	0010	0010	50	0	52	0	31	11	31	0	175
2	142754557	A	G	0100	0110	38	0	56	9	25	5	64	0	197
2	144020949	C	A	0101	0111	71	0	62	6	44	3	25	29	240
2	145338695	T	A	0001	0001	51	1	41	0	34	0	27	6	160
2	146424944	A	G	0111	0111	52	0	52	15	31	15	30	17	212
2	146722807	A	G	0001	0001	37	0	79	0	51	0	34	13	214
2	148118892	C	A	0001	0001	44	0	53	0	42	0	50	7	196
2	148560903	G	T	0111	0111	61	0	40	17	23	15	23	33	212
2	148614791	C	T	0010	0010	55	0	70	0	44	8	42	0	219
2	150761813	C	A	0111	0111	39	0	47	15	33	12	38	10	194
2	151588096	T	A	0001	0001	56	0	73	0	40	0	33	13	215
2	152710322	T	A	0111	0111	60	0	47	18	39	12	41	14	231
2	154206546	C	T	0110	0110	52	0	62	10	52	9	29	0	214
2	154336170	G	A	0001	0001	45	0	49	1	47	0	35	10	187
2	155459818	T	G	0001	0001	65	0	56	0	46	0	40	12	219
2	155473534	C	A	0111	0111	58	0	29	11	29	13	24	23	187
2	155737485	T	A	0010	0010	58	0	79	0	47	8	59	0	251
2	156497323	T	A	0001	0001	37	0	61	0	27	0	25	11	161
2	158289888	G	C	0111	0111	78	0	46	20	50	20	41	42	297
2	163116001	C	T	0001	0111	60	0	59	4	49	3	29	26	230
2	169130073	C	T	0001	0001	24	0	35	0	27	0	23	6	115
2	174222262	G	T	0001	0101	54	0	41	4	32	0	43	19	193
2	174268805	G	A	0001	0001	49	0	48	1	46	0	39	12	195
2	174269131	T	G	0001	0001	70	0	61	0	42	1	46	15	235
2	178149688	G	A	0001	0101	53	0	45	2	52	0	33	19	204
2	179423165	C	T	0010	0010	80	0	68	0	44	7	42	0	241
2	180461172	A	C	0010	0110	45	0	60	3	48	12	77	0	245
2	184113832	T	G	0111	0111	63	0	47	12	40	19	37	14	232
2	186290509	G	A	0001	0101	70	0	75	2	62	0	46	14	269
2	186889484	C	T	0111	0111	57	0	67	12	40	19	32	23	250
2	188444964	T	G	0010	0010	47	0	48	0	52	9	67	0	223
2	192021045	A	T	0001	0001	58	0	50	0	56	1	43	7	215
2	192188535	A	G	0111	0111	71	0	61	21	49	16	37	35	290
2	192655116	T	A	0001	0111	52	0	77	4	64	2	41	14	254
2	194797255	T	C	0011	0111	24	0	58	3	48	5	32	13	183
2	197205427	G	C	0111	0111	32	0	40	16	29	9	46	7	179
2	201606302	A	G	0111	0111	41	0	27	5	18	5	23	32	151
2	204876410	A	G	0111	0111	68	0	66	28	46	12	49	29	298
2	204887573	A	C	0111	0111	51	0	39	16	38	15	46	15	220
2	207463161	A	G	0110	0110	37	0	61	7	26	4	36	0	171
2	209722938	T	G	0111	0111	55	0	41	9	25	19	16	15	180
2	211461338	T	G	0010	0010	53	0	62	0	49	9	46	0	219
2	212991845	C	A	0111	0111	68	0	45	12	37	19	30	30	241
2	213236995	G	A	0001	0001	59	0	75	0	52	1	46	9	242
2	213239938	G	A	0001	0001	60	0	93	0	71	1	53	25	303
2	213240674	G	A	0001	0001	89	0	69	0	62	0	41	14	275
2	213240923	G	C	0001	0001	77	0	66	0	63	0	37	18	261
2	213252068	T	C	0111	0111	43	0	42	11	42	15	32	18	203
2	213583585	T	C	0111	0111	66	0	55	19	47	9	45	23	264
2	214060075	C	G	0111	0111	56	0	44	15	38	6	18	19	196
2	216179250	T	G	0111	0111	40	0	30	17	29	8	52	23	199
2	221434677	C	T	0111	0111	52	0	40	12	32	21	27	27	211
2	222815075	A	G	0110	0110	45	0	68	10	33	7	43	0	206
2	223376188	G	A	0111	0111	45	0	28	10	21	7	21	6	138
2	223703368	T	C	0001	0001	50	0	65	0	43	0	33	7	198
2	223705948	A	C	0111	0111	41	0	39	13	26	12	21	26	178
2	228683783	C	T	0111	0111	56	0	41	11	20	9	25	18	180
2	228788417	A	G	0001	0101	36	0	55	4	33	1	40	8	177
2	230158264	T	C	0001	0001	51	0	53	0	39	0	36	8	187
2	230260441	C	A	0011	0111	51	0	50	3	36	6	27	13	186
2	230871613	G	A	0111	0111	39	0	22	9	24	4	32	7	137
2	230980848	T	A	0111	0111	43	0	39	10	37	13	25	18	185
2	232806948	G	A	0111	0111	52	0	39	14	22	7	36	11	181
2	234706799	C	T	0001	0001	41	0	37	0	42	0	23	7	150
2	234711866	C	G	0001	0001	60	0	48	1	34	0	27	9	179
2	239588137	T	C	0111	0111	71	0	50	20	41	11	20	32	245
2	241009469	A	C	0111	0111	54	0	44	15	27	23	58	14	235
2	241934512	C	T	0111	0111	51	0	25	12	22	7	22	20	159
2	242317556	G	A	0001	0001	25	0	23	0	24	0	15	6	93
3	1684038	G	A	0111	0111	42	0	56	12	36	9	32	18	205
3	2961390	A	G	0111	0111	40	0	45	15	49	11	44	20	224
3	5440016	C	T	0001	0001	59	0	55	0	52	0	52	10	228
3	7016201	T	A	0111	0111	48	0	26	16	24	9	30	20	173
3	7349462	C	T	0001	0001	85	0	89	1	55	0	57	16	303
3	8330558	T	G	0111	0111	53	0	42	17	25	4	39	20	200
3	9204100	A	T	0001	0001	44	0	46	0	35	0	38	10	173
3	9321492	C	T	0001	0001	33	0	34	0	23	0	25	5	120
3	12001756	A	C	0001	0001	55	1	61	0	75	0	62	15	269
3	14205731	T	C	0111	0111	49	0	50	7	38	5	30	22	201
3	14380176	A	C	0001	0101	60	0	46	2	38	0	40	28	214
3	16110918	G	C	0100	0100	88	0	60	8	75	0	82	0	313
3	16602923	C	T	0001	0001	71	0	80	0	58	0	60	13	282
3	24219020	G	A	0010	0111	38	1	53	4	31	13	59	4	203
3	24689904	T	C	0111	0111	60	0	63	20	47	8	36	20	254
3	25790627	C	A	0001	0001	67	0	67	0	55	0	61	11	261
3	26553009	A	G	0010	0010	35	1	49	1	28	11	44	1	170
3	26856149	G	A	0110	0110	58	0	57	7	40	10	62	0	234
3	30489572	C	A	0001	0001	72	0	65	0	66	1	52	16	272
3	31077557	G	A	0001	0001	55	0	57	0	58	0	42	9	221
3	32943815	G	A	0001	0001	39	0	50	0	37	0	55	11	192
3	34847761	G	A	0111	0111	41	0	38	23	31	8	38	29	208
3	36649123	A	G	0001	0001	52	0	58	0	63	0	53	11	237
3	36799199	C	T	0010	0010	53	0	37	0	30	9	48	0	177
3	40341140	G	T	0111	0111	79	0	54	12	41	14	45	28	273
3	41150807	A	G	0111	0111	56	1	48	10	22	9	37	19	202
3	42072936	G	A	0110	0110	34	0	20	10	24	3	41	0	132
3	44000238	A	G	0111	0111	45	0	35	13	36	8	28	15	180
3	46023813	A	G	0111	0111	55	0	37	11	44	9	51	40	247
3	47083639	G	T	0111	0111	68	0	43	12	29	21	27	24	224
3	47287984	G	A	0111	0111	27	0	42	11	28	5	28	13	154
3	48291946	C	G	0111	0111	33	0	47	8	27	5	38	20	178
3	53889930	T	C	0111	0111	58	0	47	20	53	13	52	28	271
3	56352022	T	C	0001	0001	63	0	61	0	50	0	46	10	230
3	63663540	A	T	0111	0111	53	0	29	13	41	12	28	26	202
3	64602933	C	T	0011	0111	79	0	62	4	52	7	29	25	258
3	68556943	G	A	0001	0001	58	0	55	0	61	0	46	16	236
3	70188601	C	T	0001	0001	50	0	34	0	32	0	26	7	149
3	71254489	T	G	0010	0010	72	0	78	0	38	8	81	0	277
3	75770581	C	A	0100	0101	26	0	29	6	26	1	40	3	131
3	76925836	A	T	0111	0111	51	0	31	20	21	11	34	20	188
3	78207503	C	T	0001	0101	47	0	59	2	58	0	54	17	237
3	82268193	G	T	0111	0111	57	0	48	24	40	18	33	23	243
3	82283176	T	C	0111	0111	57	0	44	11	38	10	47	23	230
3	84607299	C	A	0111	0111	73	0	59	13	51	27	23	30	276
3	86353067	C	A	0100	0100	23	0	24	6	25	1	34	0	113
3	86526146	C	T	0111	0111	54	0	50	21	38	18	32	28	241
3	88130594	T	A	0001	0101	51	0	63	3	68	0	51	12	248
3	90368451	C	T	0111	0111	38	0	61	29	40	17	38	28	251
3	93954584	C	T	0111	0111	64	0	40	11	42	11	29	18	215
3	95459494	T	C	0111	0111	55	0	73	20	44	16	40	25	273
3	97562753	A	T	0001	0101	54	0	60	2	36	0	49	12	213
3	97845277	C	T	0111	0111	59	0	52	19	42	11	36	22	241
3	99474110	A	T	0001	0001	74	0	80	0	45	0	65	10	274
3	100173511	C	T	0001	0001	61	0	76	1	44	0	46	8	236
3	100425867	C	G	0110	0110	86	0	53	9	55	7	88	0	298
3	101353276	C	T	0001	0101	58	0	58	2	45	0	48	13	224
3	103733012	A	G	0111	0111	24	0	26	6	18	7	21	16	118
3	110687015	T	A	0001	0001	69	0	66	1	50	0	48	18	252
3	112421232	G	A	0110	0110	61	0	57	11	47	12	78	0	266
3	117101793	T	A	0010	0111	36	0	30	3	16	8	38	5	136
3	117346765	A	T	0001	0001	48	0	84	0	45	0	50	14	241
3	118412291	C	T	0111	0111	57	0	41	21	41	8	38	27	233
3	118871495	G	A	0001	0001	67	0	63	1	69	0	73	15	288
3	121504606	T	G	0001	0001	54	0	63	0	55	1	45	21	239
3	124761989	C	T	0001	0001	38	0	40	0	27	0	40	10	155
3	125075120	C	A	0001	0101	53	0	77	4	48	1	48	32	263
3	127954264	T	G	0001	0001	64	0	55	0	38	0	50	9	216
3	131145284	G	T	0111	0111	38	0	32	15	15	8	29	19	156
3	131711153	C	T	0001	0101	62	0	43	3	43	0	26	19	196
3	132966817	A	T	0111	0111	65	0	48	12	36	14	51	42	268
3	134543318	C	T	0001	0001	43	0	49	0	31	0	42	8	173
3	136655876	A	G	0001	0001	79	0	86	0	61	0	61	14	301
3	136807762	T	A	0001	0001	62	0	90	0	72	0	57	16	297
3	137119408	C	T	0110	0110	41	0	31	6	24	7	43	0	152
3	140793451	C	T	0001	0001	43	0	50	0	26	0	45	8	172
3	143251799	G	T	0111	0111	49	0	38	16	22	11	35	8	179
3	144114407	T	C	0110	0110	46	0	58	6	31	7	69	0	217
3	147674239	T	C	0111	0111	40	0	26	10	24	5	19	14	138
3	147757398	C	A	0111	0111	41	0	45	8	29	4	28	15	170
3	147991751	C	T	0111	0111	62	0	48	15	42	24	41	19	251
3	148764038	T	C	0001	0001	47	0	72	0	55	0	49	21	244
3	149803371	C	T	0010	0111	36	1	47	7	18	22	59	4	194
3	150361838	G	A	0110	0110	36	0	49	6	23	5	57	0	176
3	151064636	A	T	0111	0111	67	0	43	11	36	17	44	21	239
3	152182065	G	A	0010	0010	49	1	74	0	59	11	75	0	269
3	154903235	T	A	0111	0111	39	0	39	6	18	6	32	20	160
3	157000054	G	A	0111	0111	38	1	23	9	17	9	22	19	138
3	167508054	T	G	0001	0001	54	0	76	0	60	0	63	13	266
3	170826804	G	A	0111	0111	56	0	32	12	35	11	45	31	222
3	175671551	C	T	0111	0111	53	0	34	14	41	18	47	25	232
3	178279459	A	G	0111	0111	71	0	66	26	32	21	43	33	292
3	178795194	C	T	0010	0010	52	0	42	0	31	8	60	0	193
3	182191222	C	A	0111	0111	36	0	33	9	27	9	31	22	167
3	184059806	C	A	0111	0111	44	0	32	12	21	16	24	21	170
3	185855979	G	A	0001	0001	33	0	37	0	26	0	37	10	143
3	187389541	C	G	0111	0111	64	0	47	20	35	17	33	33	249
3	190086521	G	A	0100	0110	70	0	74	10	69	5	61	0	289
3	191513021	C	T	0111	0111	28	0	45	18	29	6	27	25	178
3	193224377	G	T	0001	0001	56	0	55	1	46	0	40	8	206
3	193757195	C	T	0110	0110	34	0	43	5	33	6	43	0	164
3	194319213	G	T	0001	0001	37	0	25	1	20	1	34	15	133
3	196615433	C	T	0001	0001	63	0	30	0	37	0	39	16	185
3	197263392	C	T	0001	0001	49	0	68	0	40	0	70	17	244
3	197447703	G	A	0111	0111	61	0	59	12	41	13	50	19	255
4	6825901	C	T	0111	0111	51	0	41	12	23	11	23	21	182
4	7208546	C	A	0110	0110	56	0	38	7	25	5	45	0	176
4	9717450	G	A	0111	0111	59	0	39	17	39	16	27	36	233
4	12544168	C	T	0001	0001	48	0	44	0	35	0	32	7	166
4	14593799	A	G	0111	0111	62	0	57	14	49	11	29	38	260
4	14733450	T	G	0001	0001	54	0	60	0	48	0	34	11	207
4	16909160	G	T	0111	0111	58	0	61	13	32	5	32	9	210
4	17916597	T	C	0001	0101	36	0	52	2	47	1	20	28	186
4	20202327	G	C	0001	0001	37	0	75	1	32	1	20	15	181
4	26545768	T	A	0001	0001	50	0	58	0	49	0	37	11	205
4	26919468	C	G	0001	0101	49	0	73	3	45	0	41	18	229
4	27278741	C	A	0001	0001	48	0	63	0	55	0	31	14	211
4	28273250	C	T	0001	0101	43	0	78	3	46	0	37	18	225
4	28539633	A	G	0111	0111	45	0	53	17	37	9	23	20	204
4	32773797	G	A	0001	0001	48	0	75	0	63	0	52	8	246
4	36082715	A	T	0001	0001	49	0	55	0	48	0	42	14	208
4	36321669	C	T	0001	0001	70	0	72	0	76	0	37	14	269
4	37194161	G	A	0111	0111	48	0	55	18	35	5	29	14	204
4	37709752	C	T	0010	0011	48	1	53	1	44	7	46	2	202
4	38144608	G	A	0111	0111	70	0	38	12	26	16	28	24	214
4	44004603	A	T	0111	0111	64	0	41	9	40	7	31	10	202
4	48234322	C	A	0001	0001	48	0	58	0	42	1	37	7	193
4	54106469	A	G	0110	0110	42	0	63	16	47	5	60	0	233
4	55596035	G	A	0001	0101	48	0	41	2	55	0	35	28	209
4	56192378	T	A	0001	0101	42	0	47	3	33	1	34	19	179
4	56460545	A	T	0111	0111	42	0	41	13	46	16	21	25	204
4	57648439	C	G	0001	0101	45	0	47	2	55	0	26	25	200
4	59988224	T	A	0111	0111	36	0	48	19	45	15	27	20	210
4	60794933	A	G	0111	0111	64	1	60	19	56	18	36	29	283
4	61650775	A	G	0111	0111	29	0	48	17	35	12	29	25	195
4	62847965	A	G	0111	0111	77	0	69	23	43	25	21	29	287
4	64302062	G	A	0010	0010	76	0	68	1	54	8	53	0	260
4	64451635	T	C	0111	0111	33	0	56	15	25	9	32	19	189
4	64813868	C	T	0111	0111	27	0	31	14	26	10	18	7	133
4	65125864	T	A	0001	0101	44	0	70	2	62	0	35	14	227
4	65587217	G	T	0010	0110	49	1	42	6	35	11	35	1	180
4	67637921	G	A	0001	0001	52	0	71	0	68	1	39	10	241
4	68204650	A	G	0001	0001	62	0	67	0	67	0	42	19	257
4	71244732	A	C	0111	0111	48	0	41	12	35	7	21	21	185
4	76690000	C	T	0101	0111	63	0	51	10	60	4	29	33	250
4	77380606	G	T	0111	0111	79	0	46	11	33	7	27	32	235
4	79002935	G	A	0111	0111	39	0	34	7	28	16	16	18	158
4	80422817	G	A	0001	0001	49	0	58	0	47	0	35	11	200
4	81446023	C	T	0001	0001	76	0	60	0	45	0	38	12	231
4	81901915	T	C	0001	0001	71	0	60	0	45	0	34	11	221
4	85253327	T	A	0001	0001	48	0	69	0	50	0	32	13	212
4	86297341	A	T	0111	0111	75	0	54	12	45	9	43	9	247
4	89957507	T	C	0010	0010	60	0	62	0	46	10	34	0	212
4	94296648	C	T	0111	0111	50	0	23	13	21	15	22	19	163
4	99114469	C	G	0111	0111	65	0	50	15	33	11	35	7	216
4	99483356	T	G	0111	0111	48	0	46	14	30	6	17	22	183
4	101157267	A	T	0001	0001	57	0	68	1	40	1	21	18	206
4	101171533	G	A	0001	0001	58	0	69	0	52	0	23	10	212
4	102088559	A	G	0111	0111	62	0	51	14	51	14	36	34	262
4	102471286	A	T	0111	0111	48	0	39	9	24	11	34	20	185
4	102862977	A	G	0001	0001	55	0	61	1	60	0	27	13	217
4	105255001	C	A	0111	0111	34	0	50	12	32	9	32	16	185
4	106956298	A	G	0111	0111	62	0	88	10	56	7	41	10	274
4	109648635	A	G	0001	0001	31	0	52	0	37	0	28	6	154
4	116983972	C	G	0111	0111	38	0	33	8	39	8	40	16	182
4	117281315	C	T	0001	0001	49	0	42	1	31	0	24	8	155
4	118049335	G	T	0111	0111	53	0	33	3	33	7	26	18	173
4	119200983	T	C	0001	0101	61	0	84	3	40	1	58	15	262
4	120731270	G	T	0001	0001	30	0	31	0	26	0	21	4	112
4	123068777	G	T	0111	0111	63	0	33	17	43	18	38	30	242
4	124085034	T	G	0001	0001	58	0	74	0	73	0	37	9	251
4	126454620	C	T	0001	0001	54	0	78	0	56	0	32	7	227
4	128346074	G	A	0001	0001	52	0	44	0	43	0	30	11	180
4	132902172	T	C	0111	0111	28	0	35	16	25	8	23	10	145
4	133729249	A	G	0110	0110	55	0	58	9	38	6	37	1	204
4	133832037	G	A	0001	0101	61	0	71	3	63	1	25	25	249
4	137122049	A	C	0111	0111	35	0	40	9	29	10	41	15	179
4	137151169	T	C	0111	0111	55	0	33	9	38	15	21	26	197
4	137934321	A	G	0001	0001	25	0	66	0	30	0	35	9	165
4	142524300	A	T	0001	0001	53	0	80	0	63	0	27	15	238
4	142553905	G	A	0001	0001	40	0	63	1	57	0	46	19	226
4	142914093	T	G	0001	0001	56	0	57	0	57	0	35	18	223
4	143676992	G	A	0111	0111	46	0	58	15	30	17	27	16	209
4	144757007	G	T	0100	0100	21	0	59	9	40	0	36	1	166
4	144757012	G	T	0100	0100	21	0	56	9	42	0	35	1	164
4	149795134	G	T	0111	0111	43	0	63	17	43	13	37	13	229
4	150306639	G	A	0111	0111	56	0	39	8	32	6	34	11	186
4	150687942	C	T	0111	0111	48	0	59	18	34	15	52	11	237
4	159538259	C	A	0111	0111	47	0	46	15	29	7	17	9	170
4	165008674	G	C	0111	0111	42	0	38	13	29	13	30	26	191
4	165008676	A	C	0111	0111	42	0	37	14	31	13	30	26	193
4	168286129	G	A	0001	0001	43	0	77	0	47	0	41	8	216
4	171826254	T	C	0111	0111	49	0	63	23	31	16	46	11	239
4	171981248	C	A	0011	0111	30	0	46	4	28	3	16	26	153
4	174523945	C	A	0110	0110	49	0	50	11	23	8	36	0	177
4	174624958	C	T	0110	0110	55	0	56	11	48	7	50	0	227
4	174635705	T	A	0111	0111	58	0	59	18	35	12	22	17	221
4	175739729	T	A	0001	0001	53	0	82	0	48	0	37	12	232
4	176612230	A	G	0001	0001	59	0	77	0	54	0	51	14	255
4	177060497	G	T	0001	0001	45	0	64	0	49	0	55	8	221
4	179201835	G	A	0111	0111	62	0	38	15	40	9	49	11	224
4	179684632	G	A	0111	0111	44	0	48	19	42	14	16	17	200
4	186632001	C	G	0111	0111	48	0	47	8	22	12	25	14	176
4	187305375	A	T	0111	0111	61	0	43	19	30	15	29	29	226
4	188836846	C	G	0100	0111	31	1	41	7	25	2	23	2	132
4	190171583	A	G	0001	0101	53	0	63	2	65	0	32	14	229
5	2098972	C	T	0111	0111	41	0	30	5	26	10	18	11	141
5	2250303	G	A	0100	0100	49	0	38	7	36	0	52	0	182
5	3027631	G	T	0111	0111	37	0	18	6	24	8	15	12	120
5	3709652	C	T	0001	0001	64	0	54	0	44	0	43	10	215
5	4169853	A	G	0001	0001	30	0	49	0	34	0	35	10	158
5	5067457	C	T	0001	0001	41	0	59	0	38	0	24	12	174
5	5569869	G	A	0001	0001	41	0	32	0	20	0	24	6	123
5	6940541	G	A	0001	0011	55	0	47	1	45	4	25	7	184
5	9934887	G	A	0111	0111	64	0	34	9	36	14	23	22	202
5	11236597	C	T	0001	0001	68	0	55	1	54	0	33	10	221
5	12510589	G	T	0001	0001	40	0	67	0	43	0	46	13	209
5	12531046	T	A	0110	0110	53	0	62	6	46	10	37	0	214
5	13725428	A	G	0001	0001	56	0	56	0	54	1	30	27	224
5	14248643	C	G	0001	0001	32	0	39	0	36	0	30	10	147
5	14726967	A	C	0111	0111	52	1	28	8	19	11	26	12	157
5	15550414	C	A	0111	0111	40	0	47	15	30	14	32	15	193
5	17786413	C	G	0111	0111	44	0	33	12	21	15	33	10	168
5	18582358	A	G	0111	0111	76	0	53	14	32	22	51	18	266
5	18727204	A	C	0111	0111	57	0	42	14	39	13	30	16	211
5	18870505	C	T	0001	0001	54	0	75	0	70	0	40	18	257
5	19046026	C	T	0111	0111	39	0	43	15	17	22	25	10	171
5	19240005	C	T	0001	0001	68	0	52	0	43	0	39	9	211
5	19392690	G	C	0100	0100	53	0	70	12	62	0	45	0	242
5	19871778	A	T	0111	0111	66	0	43	22	54	14	36	37	272
5	20442901	G	T	0001	0001	25	0	36	0	27	0	19	11	118
5	24164177	C	T	0111	0111	38	0	30	9	18	8	18	23	144
5	24468601	T	A	0001	0101	20	0	46	3	23	1	15	18	126
5	26227225	A	G	0111	0111	43	0	33	8	34	9	25	16	168
5	27504030	T	C	0110	0110	60	0	58	6	36	9	52	0	221
5	28129726	C	T	0111	0111	50	0	54	22	36	21	16	26	225
5	29581915	G	A	0001	0001	33	0	53	0	42	0	26	14	168
5	30472545	G	A	0111	0111	62	0	35	11	38	18	23	32	219
5	31524269	C	T	0001	0001	45	0	54	0	36	0	27	6	168
5	32070523	C	T	0010	0010	57	0	66	0	40	8	49	0	220
5	34964229	A	G	0111	0111	71	0	61	21	43	10	30	32	268
5	35564484	G	A	0001	0001	59	0	57	0	56	0	34	12	218
5	36356522	T	G	0111	0111	61	0	52	19	32	17	50	16	247
5	37741475	C	T	0110	0110	49	0	42	7	38	18	42	0	196
5	38706012	G	A	0111	0111	32	0	25	5	20	11	12	9	114
5	38886578	T	C	0011	0111	75	0	63	6	33	10	34	35	256
5	39919672	C	A	0001	0001	44	0	57	0	45	0	30	14	190
5	39972579	A	G	0001	0001	75	0	67	0	76	0	49	21	288
5	41666065	T	C	0111	0111	60	0	47	15	36	19	28	26	231
5	41690828	T	A	0111	0111	67	0	39	15	53	16	19	16	225
5	46211151	A	T	0010	0010	62	1	61	1	53	9	64	0	251
5	50207818	C	T	0101	0101	50	0	61	5	50	0	16	19	201
5	50251533	A	T	0001	0001	58	0	63	0	40	0	31	7	199
5	52130296	A	G	0111	0111	80	1	44	12	36	24	33	11	241
5	53445098	G	A	0111	0111	76	0	45	20	48	19	34	12	254
5	54208811	T	A	0001	0001	57	0	55	0	61	0	48	17	238
5	55089034	C	A	0111	0111	57	0	61	8	38	16	21	19	220
5	55144054	G	A	0001	0011	45	0	66	0	52	2	36	7	208
5	55300890	C	A	0010	0010	25	0	32	0	23	5	41	0	126
5	55641128	C	T	0001	0001	72	0	72	0	64	0	39	21	268
5	56312897	T	A	0111	0111	38	0	29	7	26	10	12	24	146
5	56312898	A	C	0111	0111	38	0	29	7	27	10	12	24	147
5	56858772	T	A	0111	0111	59	0	54	26	47	17	36	16	255
5	57232024	T	A	0001	0001	72	0	75	0	53	0	30	12	242
5	66947369	A	G	0001	0001	50	1	55	0	40	0	38	14	198
5	66947372	A	G	0001	0001	49	1	56	0	42	0	35	14	197
5	71985783	C	T	0111	0111	57	0	46	17	50	19	28	32	249
5	72274902	G	T	0110	0110	76	0	59	6	46	13	44	0	244
5	72791781	A	G	0001	0001	35	0	45	0	33	0	31	7	151
5	75147619	C	T	0001	0001	27	0	26	0	24	0	19	11	107
5	81818916	C	G	0001	0001	62	0	57	0	57	0	47	9	232
5	86004236	T	C	0111	0111	74	0	54	12	39	10	32	14	235
5	86892839	A	T	0111	0111	36	0	29	12	27	9	27	8	148
5	87820571	C	T	0010	0010	48	0	65	0	36	9	39	0	197
5	98485794	C	T	0001	0001	53	0	57	0	42	0	39	12	203
5	102029721	C	T	0111	0111	56	0	36	11	24	10	22	9	168
5	104891313	T	A	0111	0111	54	0	57	6	55	8	20	27	227
5	106222316	A	G	0100	0100	60	0	76	11	71	1	55	1	275
5	107489856	G	C	0111	0111	63	0	45	14	43	15	31	19	230
5	108857167	G	A	0001	0001	56	0	43	0	28	0	26	9	162
5	108908754	G	A	0001	0001	51	0	58	0	61	0	37	8	215
5	109599711	C	T	0001	0001	55	0	54	0	45	0	33	6	193
5	113114986	C	T	0111	0111	39	0	37	17	27	12	36	13	181
5	114272914	A	G	0001	0001	43	0	52	0	50	0	31	6	182
5	115285034	A	G	0111	0111	67	0	49	16	39	7	34	20	232
5	116251785	A	G	0111	0111	66	0	35	12	44	14	35	13	219
5	117606021	G	A	0100	0100	71	0	63	8	37	0	37	0	216
5	118335703	A	G	0111	0111	51	0	54	14	42	20	17	22	220
5	119044869	G	A	0111	0111	43	0	41	19	29	8	19	23	182
5	119388846	T	A	0110	0110	53	0	73	10	54	11	78	1	280
5	120263035	G	A	0001	0001	46	1	67	0	36	0	23	10	183
5	123583368	G	C	0001	0001	48	0	70	0	51	0	29	10	208
5	130822441	G	T	0010	0111	21	1	22	7	21	7	19	5	103
5	135081764	C	T	0111	0111	49	0	21	8	18	7	15	16	134
5	137493135	G	A	0001	0001	44	0	34	1	30	0	31	7	147
5	143680759	G	A	0111	0111	30	0	24	6	18	9	27	14	128
5	147854071	C	T	0001	0111	57	0	51	2	46	2	44	10	212
5	148496163	T	A	0101	0111	62	0	41	10	43	3	48	22	229
5	151244928	G	A	0001	0001	60	0	50	0	45	1	35	17	208
5	153026245	G	A	0111	0111	67	0	43	11	42	8	29	8	208
5	153304072	G	T	0100	0110	52	0	46	8	49	5	47	0	207
5	153899982	T	C	0001	0001	52	0	60	0	58	0	44	12	226
5	157076666	C	T	0001	0101	35	0	40	2	29	0	27	7	140
5	157178246	C	T	0001	0101	53	0	25	2	23	0	26	12	141
5	157851690	A	T	0001	0001	57	0	64	0	60	0	36	9	226
5	158005629	G	T	0110	0110	52	0	59	9	52	7	50	0	229
5	158955732	C	T	0111	0111	32	0	38	13	25	5	14	16	143
5	159658139	G	A	0111	0111	33	0	26	12	14	10	31	9	135
5	162549713	G	A	0001	0001	37	0	43	0	37	0	27	5	149
5	163666583	G	A	0011	0111	26	0	34	2	24	6	15	11	118
5	166662497	T	A	0001	0101	63	1	72	2	53	0	45	9	245
5	167427885	G	A	0111	0111	49	0	28	8	31	8	28	14	166
5	167645410	C	A	0111	0111	66	0	36	6	18	7	38	5	176
5	175217805	G	A	0110	0111	20	0	21	5	16	5	30	3	100
5	176051299	A	G	0111	0111	49	0	33	4	14	8	23	9	140
6	4392821	C	A	0110	0110	93	0	54	10	42	11	37	0	247
6	6609722	T	C	0011	0111	65	0	44	2	43	5	29	17	205
6	9823324	A	G	0111	0111	38	0	51	19	37	13	30	13	201
6	11869194	C	T	0110	0110	62	1	47	9	35	9	31	0	194
6	15333734	A	G	0111	0111	89	0	44	26	57	18	33	22	289
6	15683872	A	G	0100	0100	78	0	51	9	42	0	37	0	217
6	20065718	C	T	0010	0010	52	0	58	1	41	10	36	0	198
6	20801318	A	G	0011	0111	48	0	52	4	19	6	21	9	159
6	21654514	C	T	0001	0001	35	0	37	0	32	0	16	10	130
6	22913255	C	T	0111	0111	61	0	63	21	41	15	24	11	236
6	23603028	C	T	0001	0001	64	0	67	1	43	0	25	9	209
6	23829796	T	C	0111	0111	60	0	48	17	45	7	32	10	219
6	24360658	G	A	0001	0001	48	0	44	0	45	0	20	15	172
6	27256619	G	A	0001	0001	24	0	40	0	46	0	15	9	134
6	29599391	G	A	0011	0011	41	0	23	1	19	2	12	11	109
6	30970953	A	G	0101	0101	49	0	46	5	32	0	21	11	164
6	32373045	C	T	0001	0001	53	0	56	0	34	0	26	7	176
6	34464819	G	A	0111	0111	25	0	33	10	30	14	24	15	151
6	36357718	G	C	0111	0111	52	0	55	17	26	9	26	6	191
6	43091135	T	G	0101	0111	35	1	29	4	15	5	19	7	115
6	47077731	G	A	0111	0111	61	0	49	18	40	15	13	11	207
6	50317984	A	T	0111	0111	44	0	43	12	37	11	33	14	194
6	51235550	A	G	0001	0001	41	0	66	0	37	0	22	14	180
6	54147233	G	T	0111	0111	71	1	58	7	41	16	30	17	241
6	54407499	T	C	0111	0111	68	0	39	15	36	17	19	16	210
6	56632170	T	A	0001	0001	23	0	53	0	31	0	21	10	138
6	63334435	G	A	0001	0001	53	0	49	0	39	0	35	10	186
6	64716615	T	C	0001	0111	65	0	65	3	60	2	36	13	244
6	66485961	C	T	0111	0111	47	0	53	16	31	11	27	8	193
6	67137862	T	A	0100	0100	34	0	47	9	33	0	29	0	152
6	67816327	C	A	0001	0001	39	0	51	0	40	0	27	10	167
6	69911447	C	T	0001	0001	60	0	53	0	53	0	20	18	204
6	70398164	G	A	0010	0110	57	0	77	3	43	6	48	0	234
6	76960659	A	G	0111	0111	67	0	38	15	40	10	27	14	211
6	77174129	C	T	0111	0111	30	0	43	18	33	13	19	8	164
6	82243082	A	T	0100	0110	44	0	46	7	40	2	29	0	168
6	85048165	A	G	0010	0010	62	0	67	1	53	8	52	0	243
6	89326947	C	T	0110	0110	55	0	43	4	32	6	29	0	169
6	90745722	G	A	0111	0111	54	0	53	12	34	13	22	9	197
6	93391918	A	T	0111	0111	60	0	61	10	38	21	32	18	240
6	93635201	G	A	0001	0001	53	0	76	0	46	0	23	16	214
6	96787838	A	G	0111	0111	48	0	55	18	42	19	36	20	238
6	97429420	A	G	0001	0001	53	1	66	0	52	0	25	15	212
6	99631810	C	T	0111	0111	54	0	42	19	46	17	28	16	222
6	100908705	A	G	0111	0111	58	0	37	16	25	5	17	9	167
6	101167617	A	T	0001	0001	20	0	46	0	37	0	21	10	134
6	101368494	C	T	0011	0111	45	0	69	4	36	6	30	10	200
6	102046339	T	A	0100	0100	43	0	44	8	39	0	34	0	168
6	103051467	G	A	0001	0001	51	0	56	0	35	0	18	8	168
6	103222489	A	G	0111	0111	54	0	63	16	47	15	30	7	232
6	104648404	G	A	0111	0111	44	0	30	13	35	15	29	7	173
6	105356800	G	C	0111	0111	25	0	19	9	12	8	12	9	94
6	110415476	G	A	0110	0110	76	0	57	9	45	7	43	0	237
6	111213532	T	C	0010	0010	59	1	65	1	44	7	42	0	219
6	111975340	C	G	0100	0110	48	0	42	7	28	6	41	0	172
6	113315554	A	G	0111	0111	28	0	38	16	17	7	19	13	138
6	119323478	A	C	0111	0111	59	0	56	17	39	11	32	13	227
6	127155742	C	T	0001	0001	49	0	50	0	57	0	38	10	204
6	127653464	T	G	0001	0011	45	0	78	1	46	2	27	7	206
6	132824479	A	C	0111	0111	55	0	60	14	36	10	25	17	217
6	136158725	G	T	0001	0001	62	0	78	0	55	0	27	13	235
6	136649149	A	G	0111	0111	38	0	50	5	21	7	16	11	148
6	137091586	A	G	0110	0110	51	0	56	12	42	7	44	0	212
6	140056074	T	C	0111	0111	47	0	53	23	29	15	34	11	212
6	140528337	A	G	0001	0001	68	0	67	0	60	0	15	11	221
6	141511067	C	T	0111	0111	58	0	52	19	38	16	38	16	237
6	145704007	G	A	0111	0111	42	0	55	6	43	4	23	13	186
6	148235272	C	T	0110	0110	28	0	34	9	30	3	28	0	132
6	152829673	A	G	0111	0111	51	1	54	18	52	25	30	15	246
6	156378167	A	G	0011	0111	30	0	61	3	38	11	25	13	181
6	157311410	G	T	0001	0001	30	0	31	0	22	0	10	14	107
6	157738973	G	A	0111	0111	58	0	56	18	30	7	30	10	209
6	159530089	C	T	0111	0111	46	0	47	14	16	5	27	8	163
6	161222628	A	G	0111	0111	73	0	59	23	42	24	31	8	260
6	163322192	G	A	0001	0001	55	0	71	0	56	0	29	15	226
6	165158720	G	A	0111	0111	52	0	39	11	22	11	13	10	158
6	165572958	C	T	0001	0001	48	0	56	1	48	0	21	21	195
6	165761838	C	A	0001	0001	62	0	76	0	58	1	32	7	236
6	168750574	G	A	0111	0111	33	0	32	13	22	11	20	11	142
6	170221131	G	T	0111	0111	45	0	54	15	28	13	20	14	189
7	448223	T	C	0011	0111	40	1	37	2	36	8	31	9	164
7	6616289	T	C	0011	0111	32	0	18	2	19	7	28	16	122
7	8389664	G	A	0001	0001	64	0	78	0	48	0	44	21	255
7	9925093	C	T	0111	0111	45	0	49	11	33	7	34	18	197
7	10695158	A	C	0111	0111	44	0	53	11	31	12	29	24	204
7	11751722	G	A	0001	0001	71	1	73	0	59	0	45	10	259
7	12715722	C	A	0111	0111	63	0	51	16	39	20	43	26	258
7	13828002	T	C	0111	0111	37	0	40	12	35	20	39	23	206
7	14605048	T	C	0001	0101	51	0	64	3	65	1	31	27	242
7	16045477	C	T	0010	0010	72	0	83	0	65	8	69	0	297
7	17298692	T	C	0111	0111	87	0	51	29	31	25	65	47	335
7	19554146	C	A	0111	0111	52	0	47	22	45	16	33	19	234
7	20908391	G	A	0110	0110	41	0	38	9	39	4	32	0	163
7	21360940	C	T	0111	0111	34	0	26	7	25	6	15	20	133
7	21997970	C	T	0001	0001	44	0	40	1	30	0	33	7	155
7	22015511	G	A	0010	0111	31	1	50	2	17	10	38	2	151
7	22667051	G	A	0001	0001	69	0	71	0	53	0	61	17	271
7	23439421	T	C	0001	0001	60	0	75	0	45	0	47	10	237
7	25244512	C	A	0111	0111	54	0	30	15	40	10	24	28	201
7	25321869	C	A	0001	0111	51	0	50	2	37	4	25	15	184
7	26231376	T	C	0010	0010	61	0	58	1	54	9	74	0	257
7	30915325	A	T	0111	0111	65	0	34	16	24	16	36	10	201
7	38941545	G	A	0111	0111	67	0	46	17	35	19	40	27	251
7	39124057	C	T	0010	0010	51	0	68	0	47	8	52	0	226
7	39125267	G	A	0010	0010	44	0	39	0	31	6	64	0	184
7	39125588	T	C	0010	0010	34	0	36	0	24	6	57	0	157
7	39125590	T	C	0010	0010	35	0	35	0	24	6	57	0	157
7	45297189	C	T	0001	0001	48	0	46	0	35	0	37	9	175
7	45444978	T	C	0001	0001	39	0	55	0	39	0	43	9	185
7	48392388	C	A	0001	0001	47	0	49	1	49	0	39	13	198
7	49114809	T	C	0001	0001	37	0	58	0	40	0	52	12	199
7	49243615	T	C	0010	0010	37	0	68	1	45	12	63	0	226
7	49564214	C	A	0111	0111	75	0	42	13	32	14	30	18	224
7	50358514	G	A	0010	0010	67	0	74	0	49	8	62	0	260
7	51190545	G	A	0111	0111	66	0	24	12	43	17	42	22	226
7	51889897	C	A	0111	0111	60	0	29	13	34	9	31	10	186
7	53131570	A	G	0111	0111	25	0	29	19	33	11	21	25	163
7	53799706	A	T	0100	0100	37	0	77	11	56	0	67	0	248
7	53818348	G	A	0001	0001	32	0	61	0	34	0	50	12	189
7	61741095	G	A	0111	0111	44	0	40	9	52	7	44	4	200
7	61741105	G	A	0111	0111	51	0	40	8	54	5	46	5	209
7	66439769	A	G	0001	0001	69	0	59	0	39	0	56	11	234
7	66518431	A	G	0011	0111	31	0	34	2	26	7	37	4	141
7	66518469	C	T	0011	0011	46	0	47	1	32	6	42	4	178
7	70695465	C	T	0111	0111	46	0	22	9	23	7	28	11	146
7	71917516	C	T	0111	0111	38	0	32	14	23	11	22	24	164
7	75605248	G	C	0001	0001	49	0	45	1	29	0	41	7	172
7	76720701	C	T	0101	0111	35	1	28	5	27	2	32	3	133
7	77160447	C	T	0111	0111	61	0	29	13	22	10	39	32	206
7	81213956	G	T	0111	0111	68	0	70	8	45	13	34	22	260
7	83546152	C	T	0001	0001	49	0	63	0	64	0	55	15	246
7	87508008	C	T	0110	0110	73	0	78	9	39	6	74	0	279
7	89803242	G	A	0111	0111	45	0	43	10	23	16	34	21	192
7	97461345	T	C	0111	0111	44	0	59	14	42	20	38	28	245
7	99167432	T	A	0110	0110	58	0	68	11	55	9	60	0	261
7	107610004	C	G	0001	0001	64	0	47	0	58	0	26	12	207
7	107684858	A	T	0111	0111	61	0	69	14	47	18	40	27	276
7	108657880	T	C	0001	0001	51	0	58	0	54	0	41	9	213
7	113466464	A	T	0111	0111	36	0	50	17	34	9	31	28	205
7	113471730	A	T	0111	0111	19	0	20	13	13	11	31	21	128
7	113781577	G	A	0001	0101	46	0	50	3	52	1	47	12	211
7	119531414	A	G	0001	0001	39	0	80	0	56	0	63	14	252
7	120835668	G	T	0111	0111	54	0	66	13	53	21	48	31	286
7	123191167	T	A	0001	0001	45	0	55	0	51	0	61	9	221
7	125956793	G	A	0110	0110	40	0	30	5	46	5	46	0	172
7	127132504	A	G	0001	0001	39	0	63	0	45	0	35	8	190
7	129258663	G	C	0001	0001	72	0	74	0	47	0	60	13	266
7	130987660	T	A	0011	0111	74	0	52	2	37	4	42	27	238
7	134082828	G	A	0111	0111	36	0	23	9	18	5	21	10	122
7	135602665	T	G	0111	0111	66	0	31	17	39	11	33	13	210
7	136951233	C	T	0110	0110	27	0	53	9	32	4	52	0	177
7	137429998	T	C	0001	0101	34	0	46	2	38	0	39	23	182
7	140594063	G	A	0010	0111	36	1	54	6	24	9	57	9	196
7	142166372	C	T	0010	0110	42	0	42	2	32	5	66	1	190
7	145051658	C	T	0111	0111	36	0	38	15	29	11	28	19	176
7	146264067	C	T	0110	0111	22	1	53	19	15	17	25	3	155
7	147367036	G	T	0100	0100	44	0	45	9	53	0	46	0	197
7	151753596	C	A	0001	0001	68	0	74	1	70	0	58	12	283
7	153145251	G	A	0001	0001	61	0	67	0	66	0	50	19	263
7	153939716	G	T	0010	0010	55	0	54	1	47	8	32	0	197
7	154529357	G	T	0010	0010	45	1	54	1	40	7	44	0	192
7	155668358	A	G	0001	0001	27	0	56	0	45	0	47	12	187
8	980657	C	A	0001	0001	43	0	51	1	48	0	58	8	209
8	1135868	A	G	0001	0001	54	0	55	0	43	0	37	9	198
8	1582366	G	T	0010	0111	41	1	41	4	23	12	45	3	170
8	1612755	C	T	0001	0001	38	0	45	0	38	0	25	6	152
8	2601525	G	C	0111	0111	51	0	74	35	56	28	50	30	324
8	2756092	T	C	0001	0001	68	0	104	0	92	0	70	16	350
8	3413468	G	A	0100	0100	47	0	77	10	78	0	92	0	304
8	3921930	A	T	0111	0111	43	0	45	22	39	24	37	13	223
8	4015285	C	T	0001	0001	40	0	48	0	57	0	43	7	195
8	9655433	A	G	0111	0111	50	0	61	23	41	25	60	22	282
8	11548871	G	T	0001	0001	47	0	76	0	40	0	41	9	213
8	13482732	G	A	0100	0100	62	0	83	10	59	0	92	0	306
8	14937637	C	T	0001	0001	47	0	71	0	45	0	62	15	240
8	15025283	C	A	0001	0001	56	0	79	0	59	0	73	14	281
8	15177339	C	T	0001	0001	48	0	87	0	74	0	56	17	282
8	15240418	C	T	0001	0001	44	0	65	0	67	0	64	9	249
8	18681788	T	C	0111	0111	73	0	65	23	53	25	61	25	325
8	20347105	A	G	0010	0010	53	0	54	0	61	11	47	0	226
8	20648318	C	T	0111	0111	55	0	57	18	38	13	25	31	237
8	20683644	C	T	0110	0110	46	0	58	11	26	4	36	0	181
8	21141460	T	A	0001	0001	32	0	75	1	38	0	52	17	215
8	21560463	C	T	0001	0001	29	0	43	0	23	1	21	26	143
8	21692631	T	G	0001	0101	27	1	29	4	23	1	28	5	118
8	21750024	C	T	0111	0111	47	0	32	15	42	19	30	34	219
8	23240336	A	T	0111	0111	30	0	24	20	19	22	26	8	149
8	23986042	A	G	0001	0001	41	0	80	1	32	1	34	20	209
8	27258981	A	G	0111	0111	80	0	73	28	52	20	65	23	341
8	28078884	A	T	0001	0111	67	0	87	5	84	4	28	43	318
8	28176512	C	A	0001	0001	57	0	51	0	39	0	62	12	221
8	30193732	T	C	0110	0110	54	0	59	14	46	7	93	0	273
8	30436608	T	C	0001	0001	59	0	60	0	48	0	71	10	248
8	30468793	T	C	0001	0101	75	0	86	6	66	1	50	65	349
8	32633268	A	T	0001	0001	58	0	94	0	69	0	61	9	291
8	33679213	A	T	0001	0001	50	0	78	0	58	0	51	10	247
8	34530321	G	T	0001	0001	66	0	115	0	93	0	58	15	347
8	35368470	G	A	0111	0111	60	0	52	16	29	16	35	35	243
8	36442475	G	T	0010	0010	32	0	75	0	54	9	75	0	245
8	36725448	T	C	0001	0001	57	0	98	1	63	0	64	10	293
8	37707491	G	A	0110	0110	33	0	22	7	22	4	54	0	142
8	38725020	A	G	0111	0111	49	1	37	14	30	7	26	16	180
8	47103145	G	A	0111	0111	24	0	25	7	18	8	16	22	120
8	47741860	A	G	0111	0111	54	0	50	33	35	35	46	23	276
8	48246399	G	C	0001	0101	55	0	90	6	78	1	50	45	325
8	48993831	G	A	0001	0001	22	0	40	0	33	0	37	9	141
8	49171773	A	T	0001	0001	42	0	93	1	51	0	58	13	258
8	51162318	C	G	0001	0101	60	0	92	2	79	1	69	10	313
8	51641807	G	T	0111	0111	38	1	47	25	33	16	27	42	229
8	52016483	T	C	0011	0111	42	0	88	5	64	15	60	19	293
8	52204804	G	A	0011	0111	50	0	63	3	60	8	23	37	244
8	52466500	G	T	0001	0001	45	0	71	0	48	0	44	14	222
8	54093032	A	C	0001	0001	41	0	72	0	51	0	73	9	246
8	56314578	C	T	0111	0111	36	0	53	17	27	6	34	15	188
8	59484686	C	T	0001	0001	42	0	71	0	62	0	67	10	252
8	59637248	G	T	0101	0101	59	1	44	5	54	1	43	39	246
8	60200162	T	C	0001	0101	74	0	71	3	76	1	38	39	302
8	60511081	C	T	0001	0001	43	0	74	0	52	0	80	15	264
8	60907573	A	G	0111	0111	77	0	53	21	37	26	39	29	282
8	63390098	G	A	0001	0001	62	0	58	0	63	0	52	11	246
8	63649946	T	C	0001	0001	74	0	93	0	77	0	76	13	333
8	64056467	C	T	0001	0001	37	0	53	0	45	0	46	8	189
8	64102995	G	T	0010	0110	40	1	63	3	30	13	76	0	226
8	64501507	C	T	0001	0001	72	0	97	0	66	0	56	8	299
8	64600419	G	A	0111	0111	46	0	66	25	29	18	50	29	263
8	66187616	G	T	0111	0111	66	0	49	20	22	15	49	21	242
8	66198780	G	A	0001	0001	48	0	48	0	49	0	44	10	199
8	68704183	G	A	0001	0001	51	0	73	0	71	0	61	10	266
8	70302959	A	T	0110	0110	43	0	78	21	61	9	85	0	297
8	70582950	T	A	0101	0101	53	0	58	5	75	1	48	35	275
8	71801990	T	C	0001	0001	39	0	77	0	55	1	51	11	234
8	72337066	C	T	0110	0110	33	0	45	11	41	5	44	0	179
8	72628216	T	A	0001	0001	68	1	76	0	66	0	52	13	276
8	73495270	T	C	0111	0111	28	0	44	13	20	13	32	12	162
8	75541527	G	T	0001	0001	57	0	90	0	75	0	64	19	305
8	75764047	A	T	0110	0110	29	0	78	8	50	6	77	0	248
8	77780291	C	A	0001	0001	69	0	86	0	96	0	69	13	333
8	78760651	C	A	0111	0111	38	0	59	28	46	24	48	21	264
8	80466426	A	G	0001	0001	44	0	65	0	52	0	67	15	243
8	82480890	G	A	0111	0111	64	0	47	23	37	15	41	46	273
8	83123377	A	G	0001	0001	57	0	88	0	86	0	76	14	321
8	83284997	G	T	0111	0111	49	0	35	16	46	12	21	38	217
8	83518409	C	T	0111	0111	53	0	64	27	53	31	60	20	308
8	84472781	A	G	0010	0010	44	0	75	0	52	8	69	0	248
8	86084534	C	T	0001	0001	61	0	78	1	46	0	57	18	261
8	90299473	T	G	0111	0111	29	0	43	19	24	15	21	12	163
8	93164816	C	T	0001	0001	46	0	94	0	62	0	60	10	272
8	94203661	A	T	0111	0111	77	0	73	29	41	32	44	25	321
8	97503635	G	A	0011	0111	61	0	75	4	66	12	59	24	301
8	97741572	G	T	0010	0110	47	0	60	5	34	15	62	0	223
8	101117176	G	A	0111	0111	77	0	65	36	40	26	72	25	341
8	108243685	C	T	0001	0001	41	0	75	0	56	0	60	12	244
8	110486173	C	T	0001	0001	52	0	70	0	41	0	55	9	227
8	110898013	G	A	0010	0010	41	0	85	1	79	10	92	0	308
8	112158318	C	T	0111	0111	20	0	52	24	46	20	28	29	219
8	112499802	T	G	0111	0111	42	0	55	15	41	33	43	14	243
8	113604393	C	T	0001	0001	46	0	80	0	60	0	58	10	254
8	121883114	G	A	0110	0110	31	0	65	7	56	8	67	0	234
8	122572910	C	T	0111	0111	69	0	50	24	43	16	39	34	275
8	125743454	A	T	0010	0010	35	0	72	0	38	9	79	0	233
8	129334599	A	T	0111	0111	71	0	58	34	36	20	64	55	338
8	130606954	T	A	0111	0111	31	0	48	19	37	17	41	18	211
8	130668176	C	T	0011	0111	53	0	54	3	29	4	35	16	194
8	131740303	G	A	0001	0011	68	0	87	0	76	3	76	12	322
8	131769052	G	A	0001	0001	27	0	19	0	31	0	29	11	117
8	135848408	G	T	0111	0111	70	0	50	15	33	13	45	26	252
8	136053848	T	C	0001	0001	59	0	54	0	53	0	33	6	205
8	138710622	C	A	0110	0110	53	0	43	15	37	9	54	0	211
8	139913950	G	T	0101	0101	40	0	40	4	52	0	28	26	190
8	140058869	G	T	0001	0001	44	0	107	0	66	0	47	11	275
8	140151994	T	A	0111	0111	44	0	48	25	29	19	34	32	231
8	140270064	C	T	0001	0111	42	0	88	7	44	2	33	37	253
8	141473448	T	A	0001	0001	69	0	100	0	53	0	83	21	326
8	143519653	C	T	0110	0110	29	0	20	6	31	5	33	0	124
8	143983067	G	A	0001	0001	53	0	53	0	48	0	40	9	203
8	144193429	G	A	0111	0111	49	0	41	20	20	14	34	21	199
9	1279150	A	C	0010	0110	37	0	51	3	32	6	41	0	170
9	2864533	C	A	0001	0001	55	0	54	0	54	0	22	13	198
9	3778612	A	T	0111	0111	39	0	40	9	25	7	20	7	147
9	3995439	C	T	0001	0001	34	0	49	1	20	0	24	9	137
9	4556037	G	A	0110	0111	30	0	37	7	13	8	25	3	123
9	15861591	G	A	0111	0111	38	0	62	17	29	11	38	8	203
9	18709976	C	T	0001	0001	55	0	69	0	58	0	34	14	230
9	19741270	C	T	0100	0100	49	0	64	9	46	0	41	0	209
9	21034013	C	A	0001	0101	58	0	53	2	35	1	18	18	185
9	24050978	G	A	0100	0100	60	0	47	10	58	1	47	0	223
9	24781409	T	C	0111	0111	26	0	35	14	14	6	17	3	115
9	26956544	C	T	0111	0111	42	0	27	12	20	16	15	15	147
9	27462811	A	T	0101	0101	89	0	72	7	80	0	27	20	295
9	31719792	C	T	0001	0111	61	0	66	4	48	4	40	7	230
9	32037275	G	A	0111	0111	41	0	28	11	21	4	28	5	138
9	32616842	C	T	0111	0111	29	0	36	8	18	13	33	5	142
9	33490032	G	T	0001	0011	26	1	59	1	26	2	22	9	146
9	34187829	A	T	0011	0111	42	0	48	4	27	3	23	22	169
9	34898540	T	C	0111	0111	60	0	48	13	32	10	21	3	187
9	71629514	G	A	0111	0111	36	0	19	7	21	9	16	12	120
9	72409980	G	A	0001	0001	45	0	50	0	36	0	20	11	162
9	72500213	C	G	0111	0111	53	0	38	11	36	10	27	20	195
9	75238943	G	A	0101	0111	82	0	53	6	51	3	15	15	225
9	77293398	A	G	0001	0001	61	0	69	0	59	0	31	8	228
9	77309817	C	A	0001	0101	64	0	63	4	49	1	36	10	227
9	81878848	G	T	0111	0111	48	0	46	11	34	6	20	10	175
9	82559712	C	T	0001	0001	64	0	52	1	40	1	40	7	205
9	83976710	T	G	0001	0001	55	0	83	0	51	0	32	16	237
9	89451896	G	A	0001	0001	44	0	49	0	34	0	27	6	160
9	89495200	G	A	0110	0110	47	0	38	10	31	8	37	0	171
9	90596183	T	C	0111	0111	63	0	74	19	45	12	48	7	268
9	94038437	G	A	0001	0101	42	0	45	3	33	0	30	9	162
9	95850361	C	G	0111	0111	36	0	25	8	10	10	24	8	121
9	96558168	A	T	0111	0111	39	0	53	23	40	9	26	19	209
9	97223222	A	T	0010	0111	25	1	52	13	21	18	34	5	169
9	101389487	G	A	0111	0111	41	0	21	6	27	9	18	17	139
9	103392112	C	A	0111	0111	53	0	46	15	39	13	21	18	205
9	106091450	G	A	0001	0001	22	0	32	0	22	0	21	8	105
9	106381492	T	C	0010	0111	35	1	47	11	20	18	26	2	160
9	108375575	C	T	0111	0111	63	0	51	18	30	12	39	13	226
9	109394218	C	T	0111	0111	64	0	60	11	51	6	33	6	231
9	114432709	T	C	0111	0111	71	0	50	22	42	13	40	10	248
9	115448951	T	C	0100	0111	43	1	31	5	36	2	40	3	161
9	116754775	C	A	0111	0111	38	0	20	6	19	5	14	17	119
9	117881237	G	C	0001	0001	55	0	54	1	29	0	26	7	172
9	118091357	G	A	0001	0001	77	0	74	0	54	0	42	18	265
9	119245880	A	G	0001	0001	71	0	75	0	51	0	41	13	251
9	120242845	C	G	0110	0111	45	0	40	4	28	5	31	3	156
9	128217082	C	G	0110	0110	44	0	57	11	30	5	53	0	200
9	131635586	T	A	0111	0111	24	1	33	13	18	5	27	8	129
10	2666750	C	T	0111	0111	23	0	15	8	12	15	13	20	106
10	4023129	A	T	0001	0001	44	0	75	0	51	0	41	18	229
10	5076369	G	A	0111	0111	38	0	33	10	22	9	14	26	152
10	5802823	T	A	0001	0001	63	0	78	1	64	0	58	13	277
10	6593751	G	A	0001	0011	54	0	56	0	48	2	34	8	202
10	7720850	T	C	0100	0100	35	0	42	8	24	1	37	0	147
10	10460589	C	T	0111	0111	37	1	30	11	24	6	26	13	148
10	11357987	G	A	0001	0001	54	0	46	0	36	0	36	8	180
10	11755277	A	G	0001	0001	44	0	40	0	25	0	19	9	137
10	14578425	C	A	0111	0111	51	1	37	11	32	12	19	25	188
10	14630088	G	C	0111	0111	62	0	76	25	38	14	31	37	283
10	18858855	T	C	0001	0111	55	1	55	6	41	2	46	8	214
10	21319375	A	G	0001	0001	57	0	40	1	25	0	21	12	156
10	21825066	C	T	0001	0101	45	0	61	2	29	0	31	9	177
10	22867120	A	G	0111	0111	67	0	32	18	29	19	41	40	246
10	22975674	T	C	0111	0111	49	0	35	11	28	11	28	17	179
10	24079198	G	A	0100	0111	38	0	48	8	41	2	25	2	164
10	26188946	T	C	0001	0111	51	0	52	3	73	6	21	20	226
10	26945244	G	A	0111	0111	40	0	39	8	22	6	25	15	155
10	28556540	A	G	0001	0001	60	0	59	0	69	0	41	19	248
10	30102255	G	A	0111	0111	52	0	24	9	21	3	18	10	137
10	30745419	G	T	0100	0110	61	0	43	8	52	3	44	0	211
10	31865206	C	T	0001	0001	56	0	69	0	47	0	52	13	237
10	44959855	C	A	0010	0110	57	0	66	8	44	10	45	0	230
10	49925013	T	C	0001	0001	53	0	58	0	38	0	30	11	190
10	52068864	G	A	0001	0001	47	0	67	0	50	0	39	7	210
10	52937106	A	G	0111	0111	64	0	55	14	58	26	52	10	279
10	53023533	G	C	0111	0111	62	0	47	22	26	15	26	30	228
10	55389360	A	T	0001	0001	61	0	75	0	61	0	45	18	260
10	56626158	T	C	0111	0111	41	0	52	24	39	11	32	12	211
10	58789332	C	T	0111	0111	57	0	51	14	34	26	35	17	234
10	60127143	T	C	0001	0101	44	0	74	4	56	0	36	15	229
10	60454848	A	G	0111	0111	83	0	48	22	43	16	23	25	260
10	63247427	T	A	0111	0111	64	0	30	9	44	17	51	13	228
10	63347631	G	A	0111	0111	67	1	38	23	47	20	35	29	260
10	67072000	T	C	0001	0111	48	0	53	3	39	3	39	12	197
10	69817967	A	T	0110	0111	55	0	51	14	36	17	48	3	224
10	70590649	C	T	0111	0111	41	0	37	17	33	11	31	4	174
10	73092521	G	T	0111	0111	56	0	33	8	25	7	28	51	208
10	82331824	G	A	0001	0001	24	0	29	0	23	0	13	6	95
10	83157310	T	G	0111	0111	39	0	53	14	48	11	29	18	212
10	84282703	C	A	0001	0001	44	0	51	1	32	0	37	17	182
10	84380997	G	A	0010	0010	50	0	61	0	44	8	44	0	207
10	84502369	C	T	0111	0111	39	0	32	6	13	11	27	9	137
10	84550158	C	T	0100	0100	50	0	42	6	40	0	51	0	189
10	85205883	A	C	0111	0111	40	0	56	20	53	17	28	13	227
10	85260254	G	A	0111	0111	37	0	49	16	22	19	31	25	199
10	86763009	T	A	0111	0111	66	0	53	16	36	18	30	29	248
10	89317391	A	T	0111	0111	45	0	38	15	32	12	16	41	199
10	89412691	T	C	0111	0111	60	0	70	13	53	13	54	20	283
10	89481640	G	A	0110	0110	52	0	56	13	46	9	43	0	219
10	89603244	A	C	0111	0111	57	0	53	18	38	7	47	23	243
10	92482674	T	C	0111	0111	40	0	34	7	18	10	26	13	148
10	93374364	A	C	0111	0111	52	0	38	16	25	8	35	11	185
10	96768026	T	C	0011	0111	56	0	46	4	25	5	34	7	177
10	97637713	A	G	0001	0001	65	0	76	0	49	0	38	7	235
10	98143325	C	A	0001	0001	37	0	47	0	29	1	37	9	160
10	98279508	T	C	0001	0001	73	0	67	0	67	0	45	21	273
10	99921189	T	G	0111	0111	62	0	60	20	39	12	23	12	228
10	100490552	C	G	0111	0111	43	0	44	20	37	7	34	10	195
10	106785398	G	A	0111	0111	32	0	31	14	12	12	24	12	137
10	108615996	G	A	0110	0110	44	0	37	5	34	7	45	0	172
10	108872503	G	A	0111	0111	66	0	66	23	45	13	37	20	270
10	109689541	G	A	0010	0110	41	1	48	2	33	12	42	1	180
10	110085858	C	T	0001	0001	45	0	40	0	26	0	29	6	146
10	112946918	G	T	0111	0111	29	0	38	7	20	6	20	6	126
10	115765730	A	T	0001	0001	35	0	32	1	18	0	23	8	117
10	116420513	T	A	0001	0001	52	0	62	0	33	0	36	14	197
10	116989009	A	G	0111	0111	31	0	47	18	33	7	19	21	176
10	117380600	A	T	0010	0010	21	0	52	0	19	6	31	0	129
10	118320709	T	C	0111	0111	72	0	56	17	51	21	46	8	271
10	120365948	G	A	0111	0111	55	0	25	9	37	7	19	25	177
10	124748294	T	C	0111	0111	73	0	57	17	46	12	47	14	266
10	129113758	A	C	0110	0110	44	0	30	4	20	7	50	0	155
10	130621725	G	A	0111	0111	23	0	20	8	18	7	11	10	97
10	131241182	G	A	0110	0110	58	0	31	4	28	6	39	0	166
10	132422996	C	T	0001	0001	69	0	50	0	43	0	34	7	203
10	132652498	G	T	0101	0101	47	0	50	5	43	0	25	20	190
10	132958097	C	T	0110	0110	31	0	22	4	21	4	25	0	107
10	135119028	G	A	0001	0001	38	0	44	0	43	0	29	11	165
11	2101536	C	T	0001	0001	43	0	60	0	47	0	51	12	213
11	3358599	C	T	0011	0111	59	0	60	2	41	9	43	24	238
11	5002546	C	T	0111	0111	50	0	48	19	42	20	37	14	230
11	9996923	A	G	0001	0001	75	0	57	0	59	0	37	13	241
11	10169040	T	C	0111	0111	61	0	52	15	57	12	32	23	252
11	19095553	G	A	0111	0111	42	0	25	13	16	8	22	9	135
11	20297022	C	T	0001	0101	69	0	71	5	52	1	28	23	249
11	21270136	G	A	0001	0001	53	0	47	0	32	0	21	12	165
11	21372216	A	G	0111	0111	63	0	54	14	53	24	31	33	272
11	24438599	T	A	0111	0111	55	0	50	19	50	10	44	12	240
11	24933174	C	G	0110	0110	49	0	55	8	37	5	39	0	193
11	26702643	T	C	0111	0111	59	0	34	15	29	12	28	5	182
11	28811264	G	A	0111	0111	52	0	49	13	33	15	29	6	197
11	29608168	G	A	0111	0111	50	0	39	23	36	11	25	24	208
11	29992650	G	A	0001	0001	63	0	72	0	39	0	26	12	212
11	31638842	A	G	0110	0110	54	0	58	6	51	16	64	0	249
11	37353085	A	G	0111	0111	43	0	41	13	31	21	25	9	183
11	38869218	A	G	0001	0001	58	0	51	0	45	0	43	11	208
11	38936576	C	T	0111	0111	58	0	42	25	36	7	24	26	218
11	46145437	C	T	0001	0001	39	0	61	0	41	0	36	16	193
11	48938054	C	T	0001	0111	73	0	76	2	63	2	51	8	275
11	48962367	T	C	0110	0111	34	1	45	8	30	7	37	3	165
11	49939606	C	A	0011	0111	50	0	62	2	43	9	24	21	211
11	50669515	A	T	0111	0111	48	1	71	8	66	9	53	7	263
11	50669562	C	G	0111	0111	56	1	68	8	66	9	65	7	280
11	54911757	G	A	0001	0001	32	0	63	0	50	0	37	12	194
11	55111825	A	C	0111	0111	44	0	58	17	37	9	42	26	233
11	55112008	G	C	0111	0111	34	0	28	19	26	12	23	20	162
11	55441685	C	T	0001	0001	69	0	74	0	65	0	35	14	257
11	55620967	G	T	0111	0111	74	0	57	17	49	15	23	22	257
11	59845251	C	T	0111	0111	39	0	24	7	19	6	19	29	143
11	60682941	G	A	0001	0001	62	0	41	0	44	0	48	9	204
11	60880876	T	C	0001	0001	40	0	38	0	37	0	24	16	155
11	69480242	T	C	0111	0111	41	0	25	14	22	7	25	13	147
11	70987198	T	C	0001	0001	47	0	53	0	39	0	42	7	188
11	71171666	C	T	0111	0111	45	0	34	12	35	10	43	21	200
11	73202646	G	A	0110	0110	79	0	53	9	62	12	70	1	286
11	76844255	A	G	0001	0001	37	0	23	0	22	0	22	8	112
11	78298988	G	T	0010	0010	42	0	22	1	18	10	31	0	124
11	78993932	C	T	0001	0001	52	0	62	0	51	0	26	7	198
11	79919997	C	A	0011	0011	48	0	73	1	48	4	50	11	235
11	80328535	C	T	0111	0111	20	1	25	12	18	8	25	5	114
11	85597736	G	A	0001	0001	34	0	33	0	35	0	40	11	153
11	87467592	A	T	0111	0111	65	0	46	7	50	21	43	13	245
11	88598983	G	A	0111	0111	61	1	46	16	38	26	39	11	238
11	89058402	T	C	0111	0111	28	1	37	7	40	6	36	6	161
11	91656172	G	C	0001	0001	43	0	52	0	44	0	36	12	187
11	93724916	G	C	0100	0110	59	0	57	15	43	2	41	0	217
11	94358363	T	C	0111	0111	63	0	46	19	37	13	46	11	235
11	95165819	G	T	0110	0110	83	0	49	6	34	11	56	0	239
11	104383141	G	A	0001	0001	59	1	70	0	49	0	38	10	227
11	104993406	G	A	0001	0001	42	0	68	0	33	0	40	11	194
11	105200602	G	A	0001	0001	63	0	51	0	53	0	37	9	213
11	106472500	C	A	0111	0111	47	0	36	16	34	12	23	19	187
11	108449591	T	A	0111	0111	78	0	52	18	39	16	52	18	273
11	109608198	A	T	0101	0111	53	0	43	11	51	3	29	24	214
11	109866482	T	C	0101	0111	55	0	63	6	43	2	37	15	221
11	110761543	T	C	0101	0101	39	0	47	8	34	1	28	5	162
11	110761565	T	C	0101	0101	53	0	52	8	40	1	40	5	199
11	113122837	G	A	0111	0111	43	0	23	10	28	14	23	13	154
11	115535909	C	T	0001	0001	38	0	36	0	27	0	23	8	132
11	116163983	G	A	0110	0110	30	0	21	5	28	5	20	0	109
11	120717739	C	T	0100	0110	56	0	44	7	45	4	37	0	193
11	123777411	C	T	0001	0001	51	0	53	0	58	0	43	16	221
11	124322433	G	T	0010	0110	45	0	57	2	43	7	41	0	195
11	124350903	A	G	0111	0111	64	0	48	9	31	11	42	16	221
11	126639904	C	T	0011	0111	46	1	38	3	28	11	17	9	153
11	127185038	G	A	0010	0010	58	0	82	0	52	7	45	0	244
11	131437983	C	T	0111	0111	50	0	41	17	32	14	32	24	210
11	131891312	G	T	0111	0111	43	0	39	13	31	9	45	10	190
11	132530143	A	T	0111	0111	46	0	36	15	27	14	29	11	178
11	132748622	C	G	0111	0111	54	0	34	15	33	11	29	26	202
11	132901096	G	A	0111	0111	56	0	41	8	31	11	17	21	185
11	133362013	C	G	0111	0111	39	0	32	8	30	4	24	11	148
11	133662024	G	C	0001	0101	39	0	41	2	28	0	32	12	154
11	134705605	C	T	0001	0011	35	0	20	1	20	2	19	9	106
11	134877558	G	C	0111	0111	34	0	29	4	25	5	16	10	123
12	1272786	A	G	0111	0111	61	0	53	20	39	7	51	26	257
12	2395302	C	T	0010	0010	83	0	62	0	49	9	93	0	296
12	4394672	G	A	0110	0110	64	0	48	8	40	6	44	0	210
12	9259700	C	T	0111	0111	55	0	50	15	33	14	38	20	225
12	12423276	G	A	0111	0111	43	0	40	7	23	11	39	18	181
12	13116199	G	T	0001	0001	62	0	53	0	54	0	55	11	235
12	13153880	G	T	0111	0111	25	0	20	6	18	7	24	20	120
12	13868255	T	C	0111	0111	61	0	55	21	47	13	37	32	266
12	14804272	A	C	0001	0001	20	0	59	0	31	0	51	12	173
12	14955584	C	T	0001	0001	68	0	48	0	48	0	59	16	239
12	20675960	G	A	0010	0010	41	0	51	0	19	8	47	0	166
12	21878639	C	T	0111	0111	67	0	61	15	57	18	36	31	285
12	22928851	A	G	0111	0111	23	0	30	8	21	2	24	4	112
12	25519266	T	G	0111	0111	31	0	44	21	22	11	28	23	180
12	25797270	T	A	0010	0010	28	1	27	0	15	8	29	0	108
12	38019717	G	A	0101	0101	49	0	66	8	71	1	36	16	247
12	38069582	T	C	0110	0110	65	0	47	9	52	10	68	0	251
12	41746811	T	C	0001	0001	70	0	70	0	56	0	40	12	248
12	43072531	T	G	0111	0111	43	0	29	6	20	10	24	16	148
12	44168469	C	T	0001	0001	71	0	73	0	48	0	50	10	252
12	44578378	C	T	0111	0111	43	0	36	12	26	14	31	9	171
12	47039402	C	A	0010	0010	35	0	58	0	42	6	57	0	198
12	48304782	T	A	0110	0110	48	0	62	11	41	5	73	0	240
12	49564815	A	G	0001	0001	26	0	60	1	33	0	40	11	171
12	52225918	A	C	0001	0001	41	0	31	0	20	1	32	10	135
12	52552372	A	G	0111	0111	48	0	41	10	27	10	44	28	208
12	53059025	C	T	0001	0001	40	0	47	0	29	0	33	14	163
12	55461578	G	A	0111	0111	44	0	28	8	23	12	25	17	157
12	59525338	T	C	0001	0001	70	0	53	0	42	0	41	8	214
12	62723152	A	G	0001	0001	45	0	46	0	42	0	47	7	187
12	63749032	A	G	0010	0010	61	0	55	0	52	9	50	0	227
12	67783882	G	C	0111	0111	32	0	30	12	34	7	31	18	164
12	71720683	G	A	0001	0001	39	1	62	0	55	0	60	8	225
12	71938740	T	C	0100	0100	44	0	45	8	34	0	48	0	179
12	72787889	T	C	0111	0111	58	0	50	17	43	14	45	20	247
12	74311637	G	A	0001	0001	36	1	56	0	46	0	36	7	182
12	77392731	A	G	0111	0111	70	0	48	27	46	19	57	19	286
12	77833753	T	A	0001	0001	47	0	52	0	54	0	52	13	218
12	81659597	T	A	0010	0010	34	0	44	0	26	6	56	0	166
12	82194077	A	C	0001	0001	70	0	67	0	56	0	67	12	272
12	82214800	T	C	0111	0111	26	0	23	4	21	7	14	12	107
12	82486370	C	T	0010	0010	31	0	45	0	26	6	28	0	136
12	85517944	G	A	0001	0001	61	0	80	0	52	0	78	12	283
12	87267417	T	C	0111	0111	37	0	57	10	25	8	33	22	192
12	87488210	G	A	0110	0110	70	0	60	11	62	10	57	0	270
12	87673162	T	C	0110	0110	69	0	54	9	55	13	81	0	281
12	88892944	C	A	0001	0001	65	0	80	0	49	0	51	14	259
12	92515282	A	C	0001	0001	50	0	79	0	49	0	50	14	242
12	97228466	C	T	0001	0011	35	0	21	1	32	2	21	17	129
12	103301427	C	T	0011	0111	52	0	29	2	28	6	35	23	175
12	103637335	C	G	0111	0111	29	0	31	14	21	7	40	22	164
12	104411455	T	G	0111	0111	53	0	47	13	27	23	39	32	234
12	104678771	T	C	0001	0101	68	0	55	2	51	1	19	24	220
12	105474651	A	C	0111	0111	71	0	54	13	43	10	43	33	267
12	106963040	G	A	0001	0001	38	0	42	0	32	0	28	8	148
12	108234034	T	C	0100	0100	55	0	58	8	50	0	87	0	258
12	108406702	A	G	0111	0111	65	0	44	14	41	16	36	20	236
12	108555877	G	T	0010	0111	31	1	22	3	14	7	31	3	112
12	110781713	G	A	0001	0001	65	0	48	0	39	0	58	15	225
12	114768853	G	A	0001	0001	44	0	35	1	30	0	26	19	155
12	117073470	G	A	0100	0100	46	0	43	7	48	0	68	0	212
12	118988009	G	T	0001	0001	33	0	28	0	21	0	25	5	112
12	119205672	C	A	0001	0001	36	0	29	0	26	1	46	9	147
12	119653697	G	A	0001	0001	37	0	48	0	41	0	43	11	180
12	121644897	C	T	0001	0001	33	0	70	0	44	0	47	10	204
12	122656019	C	T	0101	0101	43	0	27	4	30	1	42	25	172
12	125180816	G	T	0111	0111	50	0	36	4	27	4	34	23	178
12	126773339	G	T	0101	0111	72	0	52	8	53	5	38	23	251
12	126866983	T	C	0111	0111	37	0	45	24	54	8	37	15	220
12	126870404	C	T	0001	0111	37	0	51	2	33	4	18	18	163
12	129347453	C	T	0001	0011	53	0	35	0	32	2	24	22	168
12	129631087	A	G	0001	0001	47	0	59	0	47	0	58	11	222
12	130189806	A	C	0111	0111	35	0	33	20	24	10	33	31	186
12	130683631	G	A	0001	0001	35	0	33	0	33	0	31	6	138
13	21785525	G	A	0110	0110	35	0	39	8	36	12	49	0	179
13	23188502	T	A	0111	0111	65	0	47	14	58	20	26	14	244
13	24395278	C	T	0001	0001	55	0	64	0	41	0	39	22	221
13	26540391	C	T	0011	0011	44	0	52	1	47	6	28	14	192
13	27041700	T	C	0001	0001	49	0	44	0	43	0	24	13	173
13	35915231	T	C	0111	0111	52	0	48	21	45	9	16	26	217
13	38249058	T	C	0111	0111	31	0	43	14	19	10	39	17	173
13	42758844	T	A	0001	0001	41	0	55	0	39	0	24	9	168
13	43274037	C	T	0111	0111	67	0	52	15	37	8	42	12	233
13	43855908	C	A	0111	0111	68	1	40	22	42	9	28	29	239
13	48195325	G	A	0101	0101	68	0	48	9	50	0	31	29	235
13	54375870	G	A	0001	0001	52	0	67	0	67	0	40	11	237
13	56091908	C	T	0111	0111	26	0	49	16	32	16	44	8	191
13	56363754	G	A	0110	0110	34	0	34	9	18	2	24	0	121
13	56399551	T	C	0001	0001	30	0	38	0	25	0	20	8	121
13	57564704	A	C	0001	0001	60	0	95	0	65	0	52	11	283
13	58614588	A	G	0001	0001	60	0	99	0	82	0	49	9	299
13	59301868	G	A	0001	0001	50	0	57	0	51	0	43	11	212
13	59566263	A	T	0111	0111	43	0	46	12	48	16	41	15	221
13	61081823	A	G	0001	0001	66	0	84	0	69	0	45	12	276
13	62073284	T	C	0111	0111	34	0	50	14	40	9	22	32	201
13	62924953	C	T	0111	0111	42	0	41	14	32	13	18	19	179
13	63165419	C	A	0111	0111	53	0	49	16	33	17	35	18	221
13	64493117	C	T	0010	0110	46	0	63	4	39	9	46	0	207
13	65051397	A	G	0110	0110	52	0	58	10	50	11	60	0	241
13	65246106	T	C	0111	0111	42	0	45	15	37	9	23	25	196
13	66861328	G	T	0001	0001	50	0	39	1	57	0	33	6	186
13	71224050	C	T	0001	0001	27	0	41	0	37	0	14	6	125
13	74915255	A	T	0001	0001	25	0	39	0	32	0	12	8	116
13	75515459	C	T	0001	0011	74	0	77	1	52	2	31	20	257
13	75571634	A	T	0111	0111	56	0	58	24	38	13	25	27	241
13	77614106	T	C	0010	0010	66	0	35	1	42	9	46	0	199
13	77979901	A	G	0111	0111	49	0	54	16	30	13	46	14	222
13	81856966	A	G	0111	0111	35	0	56	8	26	6	25	4	160
13	83014080	T	C	0111	0111	38	0	39	20	26	20	32	20	195
13	84214361	G	A	0111	0111	45	0	44	19	28	8	24	16	184
13	87693196	C	T	0110	0110	55	0	51	7	40	10	35	0	198
13	90659912	T	A	0001	0001	54	0	67	0	51	0	40	13	225
13	91988554	C	T	0111	0111	23	0	33	7	17	6	20	3	109
13	92515204	C	A	0001	0001	41	1	58	0	36	0	28	13	177
13	93023753	C	T	0001	0001	54	0	73	0	72	0	55	18	272
13	94668134	C	T	0001	0001	87	0	78	0	66	0	48	22	301
13	95047611	T	G	0111	0111	46	0	53	13	31	15	23	19	200
13	95583592	G	T	0001	0001	54	0	60	1	41	0	34	10	200
13	95798853	G	A	0111	0111	52	0	52	16	33	18	17	14	202
13	97849447	T	C	0001	0001	64	0	74	0	64	0	30	14	246
13	98196471	T	G	0001	0001	55	0	67	0	39	0	33	12	206
13	98466716	C	T	0111	0111	47	0	41	14	39	5	28	9	183
13	99638540	T	G	0001	0011	65	0	65	1	52	2	48	11	244
13	99687562	T	C	0001	0001	69	0	62	0	54	0	50	9	244
13	101725271	C	T	0111	0111	26	0	26	9	19	6	18	6	110
13	103737614	G	A	0001	0001	59	0	45	0	37	0	26	13	180
13	104199419	G	T	0001	0001	49	0	50	0	49	0	26	8	182
13	105435593	C	T	0111	0111	56	0	33	8	23	14	17	15	166
13	108378195	A	T	0001	0001	54	0	58	0	52	0	40	14	218
13	109425323	C	T	0111	0111	60	0	47	16	43	15	32	18	231
13	109664182	G	A	0111	0111	54	0	35	14	35	16	24	9	187
13	112340704	A	G	0111	0111	48	0	28	15	33	13	17	11	165
13	113067861	C	T	0111	0111	48	1	40	15	33	13	27	21	198
13	113809946	T	A	0111	0111	61	0	44	18	31	17	50	19	240
13	114601195	T	C	0111	0111	45	0	43	9	21	10	25	19	172
14	20443368	A	T	0111	0111	35	0	46	18	45	14	20	17	195
14	24244208	C	A	0110	0110	52	0	42	7	36	4	41	1	183
14	30106913	T	C	0011	0111	36	0	79	4	38	6	38	22	223
14	30683261	G	T	0001	0001	62	0	54	0	48	0	37	14	215
14	33492823	A	G	0011	0111	51	0	77	2	53	6	51	15	255
14	33613842	G	T	0001	0001	37	0	53	1	58	0	39	9	197
14	41308208	G	A	0111	0111	60	0	40	13	44	16	34	11	218
14	41325615	G	A	0111	0111	54	0	27	13	17	13	25	20	169
14	42129383	C	T	0001	0001	27	0	40	0	30	0	32	7	136
14	42604340	T	C	0001	0001	54	0	70	0	53	0	37	13	227
14	46095625	G	A	0001	0001	52	0	54	0	55	0	36	17	214
14	46784012	A	G	0111	0111	39	0	67	15	52	22	28	36	259
14	48443100	G	C	0010	0010	61	0	59	1	33	6	48	0	208
14	49970374	G	A	0111	0111	69	0	47	20	34	15	39	22	246
14	52645396	G	A	0001	0001	42	0	43	0	38	0	31	13	167
14	52659686	G	A	0111	0111	53	0	48	10	42	8	47	10	218
14	54955049	C	G	0001	0001	52	0	71	0	40	0	50	15	228
14	55740383	C	T	0111	0111	72	0	43	27	30	14	36	41	263
14	57216222	C	T	0001	0101	35	0	31	2	24	1	11	15	119
14	57823464	C	T	0110	0110	72	0	67	6	62	12	49	0	268
14	59003860	A	C	0111	0111	57	0	62	9	33	8	38	23	230
14	60328208	A	T	0111	0111	54	0	48	23	33	19	41	16	234
14	60457942	A	G	0111	0111	62	0	38	20	56	10	28	26	240
14	62146611	T	C	0010	0111	33	1	27	8	16	14	40	7	146
14	66124294	A	C	0001	0101	61	1	60	4	44	1	21	32	224
14	68539432	G	T	0001	0001	77	0	58	0	71	0	58	19	283
14	68563744	T	G	0111	0111	50	0	57	11	31	18	40	30	237
14	68664562	T	A	0001	0001	69	0	88	0	45	0	78	11	291
14	74090853	A	G	0111	0111	29	0	25	7	27	9	19	16	132
14	74235080	G	A	0001	0001	39	0	36	0	25	0	23	13	136
14	75891125	C	T	0100	0110	75	0	52	10	54	4	73	0	268
14	79065459	G	T	0111	0111	39	0	35	6	30	5	27	9	151
14	81810397	C	T	0001	0001	38	1	41	0	33	0	27	19	159
14	82178788	C	T	0001	0001	49	0	40	0	39	0	26	6	160
14	83339669	G	A	0001	0001	35	0	69	0	25	0	39	8	176
14	83613913	G	C	0111	0111	47	0	38	20	37	17	24	26	209
14	84228677	G	A	0111	0111	32	0	45	16	57	16	52	20	238
14	87129647	A	C	0111	0111	44	0	47	11	28	8	38	10	186
14	88579340	G	A	0111	0111	21	0	27	13	19	8	20	11	119
14	90105657	T	A	0110	0110	38	0	46	8	46	8	50	1	197
14	94315755	G	A	0110	0110	54	0	33	5	36	6	59	0	193
14	94628826	G	A	0001	0101	60	0	39	2	25	0	18	17	161
14	100342050	G	A	0001	0001	38	0	37	1	23	0	21	8	128
14	101080393	C	T	0111	0111	41	0	31	7	18	6	15	23	141
14	102191065	A	G	0111	0111	27	0	41	5	27	5	24	5	134
14	107093851	C	T	0111	0111	38	1	25	12	14	13	13	10	126
15	20000110	G	A	1111	0111	40	1	42	2	26	3	25	2	141
15	20438795	T	C	0100	0110	46	0	45	9	40	2	38	1	181
15	23820069	C	T	0111	0111	36	0	32	13	29	8	33	8	159
15	23995175	C	A	0111	0111	32	0	27	8	34	7	29	11	148
15	24322568	A	T	0001	0001	57	0	58	0	39	0	42	13	209
15	25518803	C	T	0001	0001	39	0	70	0	37	0	48	11	205
15	26653308	T	C	0010	0010	55	0	60	0	45	8	56	0	224
15	27442684	C	T	0001	0001	33	0	49	0	35	0	28	10	155
15	27848798	A	C	0111	0111	49	0	54	14	35	16	30	36	234
15	29634137	G	A	0010	0011	26	1	37	0	25	10	41	4	144
15	35779295	T	C	0001	0001	49	0	51	0	56	0	36	7	199
15	38600619	G	A	0111	0111	59	1	57	21	41	24	37	63	303
15	40704673	C	T	0001	0001	58	0	40	1	43	0	53	15	210
15	41406476	A	C	0001	0001	24	0	41	0	24	0	40	9	138
15	43083504	T	C	0001	0001	47	0	45	0	35	0	33	7	167
15	45268304	G	A	0001	0111	36	1	66	7	40	3	50	8	211
15	46272676	T	A	0110	0110	55	0	56	5	52	14	67	0	249
15	46594294	C	T	0111	0111	68	0	52	22	36	23	56	12	269
15	47817308	G	T	0001	0001	60	0	44	0	31	0	26	16	177
15	49410459	G	A	0010	0111	38	1	24	3	31	8	33	2	140
15	52385248	G	A	0001	0101	79	0	78	3	58	1	45	29	293
15	55282991	C	T	0111	0111	34	0	19	12	17	8	15	14	119
15	56102097	C	A	0001	0001	37	0	44	0	32	0	29	6	148
15	57709412	T	C	0001	0001	48	0	48	0	46	0	48	15	205
15	59433590	A	T	0111	0111	59	0	43	14	42	7	59	14	238
15	59706961	G	A	0001	0001	51	0	53	0	43	0	30	11	188
15	64718971	G	A	0110	0110	41	0	35	6	22	9	44	0	157
15	65314786	G	A	0100	0100	31	0	32	7	26	1	44	0	141
15	65726820	G	A	0001	0101	47	0	25	2	22	0	27	8	131
15	67373419	C	G	0111	0111	63	0	25	14	23	16	21	37	199
15	67962621	A	T	0001	0001	67	0	60	0	57	0	57	24	265
15	72651182	C	T	0001	0001	59	0	64	0	29	1	46	17	216
15	73123451	C	T	0001	0001	66	0	56	0	49	0	42	14	227
15	76738238	G	A	0001	0001	36	0	59	0	33	0	42	8	178
15	77651517	C	A	0111	0111	43	0	43	12	21	19	27	38	203
15	77943914	C	T	0111	0111	66	0	47	12	41	18	42	12	238
15	79913311	T	A	0010	0110	46	0	63	6	39	7	56	0	217
15	80213835	C	T	0001	0001	42	0	52	0	39	0	28	8	169
15	81926063	C	T	0111	0111	42	0	42	19	30	15	19	23	190
15	82003879	G	A	0001	0001	42	0	57	0	62	1	38	6	206
15	86054524	C	T	0001	0001	56	0	67	1	51	0	50	14	239
15	86997048	A	G	0110	0110	38	0	56	9	31	4	35	0	173
15	87157908	G	T	0001	0001	56	0	82	0	81	1	69	13	302
15	87395705	A	G	0111	0111	43	0	28	6	30	9	40	12	168
15	88601135	C	T	0110	0110	47	1	26	5	16	4	40	0	139
15	88815504	G	A	0111	0111	44	0	26	5	16	8	28	9	136
15	94945505	C	A	0110	0110	59	0	58	7	48	12	48	0	232
15	95195973	C	T	0001	0001	44	0	74	0	50	0	48	10	226
15	97926492	C	T	0111	0111	55	0	53	10	33	22	19	24	216
15	98085185	C	A	0111	0111	40	0	35	12	37	6	46	6	182
15	101692409	T	C	0111	0111	28	0	28	15	19	11	16	21	138
15	102223999	C	A	0001	0001	71	0	76	1	78	0	73	11	310
16	2783084	G	A	0111	0111	46	0	58	15	28	9	83	32	271
16	6720054	G	T	0001	0001	58	0	63	0	53	1	47	8	230
16	7171451	T	A	0001	0001	30	0	68	0	57	0	64	18	237
16	7309368	C	A	0001	0001	44	0	64	1	47	1	53	14	224
16	9747234	C	G	0111	0111	45	0	40	10	46	12	60	20	233
16	13013824	T	A	0001	0001	34	0	59	1	52	0	67	13	226
16	13481624	C	T	0001	0001	24	0	37	0	25	0	34	13	133
16	13714634	T	A	0111	0111	37	0	47	11	51	14	29	34	223
16	15971000	C	T	0001	0001	46	0	59	0	39	0	75	16	235
16	17126539	C	A	0111	0111	45	0	48	13	47	13	60	14	240
16	17490125	G	C	0001	0001	64	0	65	1	45	1	75	20	271
16	17941321	G	A	0001	0001	42	0	49	0	31	0	46	10	178
16	18150645	C	A	0100	0100	52	0	34	5	29	0	64	0	184
16	18849539	G	A	0001	0001	66	0	69	0	55	0	93	17	300
16	20990614	G	A	0001	0001	38	0	49	0	39	0	86	12	224
16	21610193	C	A	0010	0110	39	1	43	2	23	7	56	1	172
16	23157497	G	A	0011	0111	34	0	35	2	20	5	21	27	144
16	24366270	G	A	0010	0010	41	0	38	0	26	6	49	0	160
16	25201765	T	A	0001	0001	37	0	54	1	60	1	68	9	230
16	25717498	A	T	0111	0111	20	0	35	16	24	7	34	7	143
16	28095656	C	A	0101	0101	33	0	48	5	37	0	42	22	187
16	31592632	G	A	0100	0101	50	1	47	7	53	1	68	4	231
16	46498096	C	T	0110	0111	63	1	44	7	40	5	32	3	195
16	52021737	A	T	0110	0110	49	0	36	8	33	9	33	0	168
16	54023995	C	T	0001	0001	49	0	36	0	33	0	36	8	162
16	56922169	C	T	0110	0110	29	0	28	6	16	4	24	0	107
16	57886454	T	C	0100	0100	41	0	34	8	33	0	25	0	141
16	63566085	T	A	0001	0001	32	0	34	0	44	0	20	8	138
16	64774340	C	T	0001	0001	59	0	40	1	46	0	27	15	188
16	65499784	C	T	0100	0100	25	0	26	5	34	0	32	0	122
16	69259127	G	A	0110	0110	87	0	53	17	44	8	51	0	260
16	75869865	G	A	0001	0001	55	0	47	1	39	0	21	7	170
16	79176995	G	A	0110	0110	36	0	40	7	23	7	36	0	149
16	83050820	G	A	0100	0100	56	0	44	9	31	0	36	0	176
17	3221298	G	A	0001	0001	57	0	37	0	50	0	40	15	199
17	6078127	G	T	0001	0011	52	0	37	0	31	2	13	12	147
17	9814691	G	A	0001	0001	28	0	34	1	18	1	24	8	114
17	9867097	A	T	0001	0001	40	0	47	0	26	0	31	8	152
17	10903986	C	A	0110	0110	46	0	53	11	19	6	45	0	180
17	10965513	A	G	0001	0001	43	0	61	0	50	0	44	9	207
17	11999800	C	A	0001	0001	39	0	68	0	49	0	39	12	207
17	12288391	C	T	0111	0111	20	0	28	6	21	5	24	7	111
17	12408200	G	A	0001	0001	43	0	70	0	62	0	43	9	227
17	12432714	A	T	0111	0111	29	0	22	17	21	6	20	7	122
17	12924559	C	G	0101	0101	34	0	34	3	30	0	15	25	141
17	13534344	G	T	0111	0111	22	0	31	7	20	5	19	6	110
17	14488988	C	T	0001	0001	54	0	58	0	43	0	32	8	195
17	17013537	C	T	0001	0001	42	0	45	0	27	0	43	11	168
17	25320600	A	C	0100	0100	38	1	41	9	25	1	35	0	150
17	25916699	G	T	0111	0111	52	0	38	14	37	6	22	21	190
17	25917277	C	A	0001	0001	91	0	86	0	67	0	46	17	307
17	27728452	C	T	0111	0111	57	0	23	10	35	11	29	13	178
17	28430358	A	C	0111	0111	34	0	35	6	24	10	23	15	147
17	30617200	C	T	0111	0111	36	0	28	19	22	7	40	7	159
17	35856212	C	T	0001	0001	44	0	53	1	30	0	45	10	183
17	41080240	T	C	0001	0001	42	1	59	0	27	0	36	12	177
17	41543456	C	T	0111	0111	52	0	37	6	28	10	25	31	189
17	45530372	C	A	0110	0110	25	0	30	5	17	2	36	1	116
17	47536707	C	T	0111	0111	40	0	26	10	21	9	17	24	147
17	48791032	C	A	0001	0001	90	0	62	0	47	0	43	21	263
17	49518065	G	T	0001	0001	43	0	36	0	24	0	40	10	153
17	51414352	C	T	0011	0011	49	0	77	0	42	5	40	8	221
17	52463815	A	T	0111	0111	38	0	56	11	38	17	25	28	213
17	52513560	G	A	0111	0111	26	0	17	12	21	4	16	10	106
17	52568364	C	T	0110	0110	59	0	72	8	56	7	44	0	246
17	53375964	G	T	0001	0001	68	0	62	0	53	0	50	17	250
17	55702030	G	A	0001	0001	58	0	41	0	48	1	26	12	186
17	59895061	T	G	0111	0111	40	0	53	10	33	12	15	22	185
17	63165492	G	A	0001	0001	48	0	52	0	42	0	34	12	188
17	63565587	C	G	0001	0001	36	0	37	0	21	0	24	9	127
17	63788346	C	A	0001	0001	60	0	81	0	68	0	47	18	274
17	64951047	G	A	0001	0001	47	0	29	0	25	0	37	17	155
17	65213740	C	T	0001	0001	38	0	38	0	24	0	26	14	140
17	66272414	A	T	0001	0001	65	0	53	0	38	0	37	11	204
17	66343277	C	A	0001	0001	42	0	41	0	28	0	32	13	156
17	67408776	C	T	0001	0001	53	0	58	0	55	0	35	16	217
17	69191518	T	C	0111	0111	53	0	59	14	39	16	40	11	232
17	69281270	C	T	0111	0111	60	0	60	28	51	21	52	18	290
17	69689605	C	A	0111	0111	40	0	42	11	40	13	28	33	207
17	69980579	C	T	0111	0111	52	0	42	13	26	11	35	13	192
17	72377703	A	T	0111	0111	52	1	31	16	29	8	25	23	185
17	75324950	A	T	0001	0001	65	0	43	1	19	0	30	17	175
17	75730102	G	A	0001	0001	63	0	49	0	24	0	39	19	194
17	77228023	C	T	0001	0001	45	0	44	0	39	0	29	10	167
18	2278009	C	A	0111	0111	47	0	42	13	30	19	25	25	201
18	3777517	T	C	0110	0110	22	0	27	11	22	2	42	0	126
18	4767813	C	T	0001	0001	33	0	46	0	29	0	42	12	162
18	5911553	G	T	0111	0111	48	0	44	17	39	10	34	25	217
18	11678432	G	A	0010	0110	59	0	54	4	49	12	58	0	236
18	18970833	C	A	0111	0111	37	0	44	11	30	12	50	19	203
18	26131448	A	C	0111	0111	51	0	76	21	58	21	51	32	310
18	26497228	A	G	0010	0010	52	0	77	0	39	6	69	0	243
18	27810819	G	T	0111	0111	36	0	34	7	31	10	19	6	143
18	28094364	G	A	0111	0111	40	0	20	14	22	9	26	12	143
18	31341070	A	C	0001	0001	46	0	53	0	39	0	32	15	185
18	33885109	C	A	0001	0001	38	0	70	0	46	0	50	19	223
18	34394673	C	T	0001	0001	62	0	79	1	44	0	41	13	240
18	35178350	C	T	0001	0001	69	0	60	0	62	0	48	13	252
18	39477513	A	G	0111	0111	57	0	51	14	40	16	48	25	251
18	41513075	T	A	0001	0001	39	0	55	0	51	0	41	8	194
18	42105916	C	T	0110	0110	46	0	41	9	53	12	62	0	223
18	43110064	A	G	0011	0111	57	0	63	4	36	13	49	21	243
18	45794722	T	G	0100	0100	48	0	43	9	51	0	83	0	234
18	46251694	G	A	0001	0001	45	0	43	1	21	0	42	11	163
18	46328563	C	T	0001	0001	45	0	36	1	42	0	26	6	156
18	48526053	C	T	0001	0001	56	0	38	0	28	0	36	6	164
18	48594885	A	G	0001	0001	39	0	92	0	47	0	47	16	241
18	48894007	G	C	0111	0111	63	0	54	19	47	12	42	21	258
18	50659602	G	C	0110	0110	63	0	52	6	49	12	57	0	239
18	54933359	C	T	0001	0001	57	0	59	0	47	0	59	11	233
18	55782050	C	T	0001	0001	44	0	32	0	35	0	46	11	168
18	57962859	T	C	0001	0001	56	0	60	0	51	1	49	11	228
18	58195230	A	G	0001	0001	54	0	53	1	53	0	34	26	221
18	58960891	G	A	0001	0001	61	0	55	1	40	0	29	14	200
18	62575934	T	C	0001	0001	66	0	76	0	58	0	66	15	281
18	62748761	C	T	0110	0110	55	0	48	13	47	6	68	0	237
18	64816517	T	A	0001	0001	79	0	62	0	59	0	36	13	249
18	65793789	T	C	0111	0111	61	0	46	21	36	18	33	19	234
18	68619999	T	A	0001	0001	51	0	60	0	46	0	39	10	206
18	70495997	G	A	0111	0111	48	0	52	15	45	16	23	26	225
18	71601406	G	A	0001	0101	58	0	43	2	43	0	33	9	188
18	76143692	G	A	0001	0001	32	0	25	0	33	0	34	9	133
19	6590008	G	T	0001	0001	38	0	36	1	26	0	30	11	142
19	7159764	C	G	0111	0111	40	0	26	9	18	7	23	19	142
19	8782278	G	A	0101	0111	24	1	52	8	45	4	47	5	186
19	10545782	A	G	0111	0111	39	0	23	8	20	8	23	23	144
19	12166804	G	A	0011	0111	53	0	34	2	26	4	20	23	162
19	16002612	C	T	0111	0111	48	0	33	8	34	9	28	12	172
19	16040092	G	A	0001	0001	36	0	32	0	28	0	28	10	134
19	19170449	A	G	0001	0001	56	0	27	0	26	0	17	9	135
19	19548042	G	A	0001	0001	39	0	33	0	27	0	26	9	134
19	19970757	G	A	0111	0111	52	0	40	12	26	6	22	15	173
19	21093213	C	T	0111	0111	55	0	35	10	37	22	38	10	207
19	21619195	G	A	0111	0111	71	0	34	19	27	9	24	11	195
19	22555219	T	C	0001	0001	50	0	50	0	58	0	39	16	213
19	24393239	C	T	0001	0001	53	0	71	0	58	0	45	10	237
19	28792830	T	A	0111	0111	49	0	46	13	46	14	19	19	206
19	29611318	C	T	0001	0001	31	0	24	0	27	0	18	11	111
19	33043679	G	A	0111	0111	40	0	34	11	22	15	13	22	157
19	34284018	C	T	0001	0001	32	0	24	0	21	0	20	10	107
19	35420050	C	G	0111	0111	32	0	32	12	23	7	32	6	144
19	38978471	G	A	0001	0001	38	0	31	1	20	0	15	7	112
19	39269001	G	A	0001	0001	28	0	35	0	23	0	24	7	117
19	40213617	C	T	0001	0001	41	0	74	0	46	0	45	15	221
19	40540164	T	G	0111	0111	53	0	50	11	29	14	26	30	213
19	44085491	C	T	0001	0001	49	0	38	0	22	0	39	11	159
19	49803468	G	A	0111	0111	42	0	38	7	20	10	34	10	161
19	50966316	A	G	0001	0101	33	0	35	2	20	0	15	26	131
19	55275971	G	C	0100	0111	28	1	36	8	23	2	31	3	132
19	55275977	C	G	0100	0111	23	1	32	9	25	4	30	4	128
19	57541059	C	T	0001	0101	28	0	44	2	38	0	30	19	161
20	1610754	G	A	0001	0001	34	0	31	0	28	0	31	7	131
20	1667076	G	A	0110	0110	54	0	33	5	38	7	46	0	183
20	3338104	G	T	0001	0001	31	0	35	0	25	0	26	12	129
20	4234365	G	A	0111	0111	28	0	15	12	17	4	28	21	125
20	4304604	G	T	0001	0001	52	0	46	0	42	0	40	15	195
20	5243903	A	G	0111	0111	57	0	51	25	38	13	38	22	244
20	5422771	G	A	0001	0101	53	0	63	2	45	0	44	14	221
20	6383438	C	A	0110	0110	36	0	45	6	29	11	50	0	177
20	8466519	G	A	0001	0001	60	0	65	0	58	0	49	19	251
20	9070304	T	G	0001	0001	53	0	62	1	54	0	56	13	239
20	11881059	G	T	0001	0001	66	0	64	0	57	0	46	12	245
20	13310632	C	T	0001	0001	40	0	42	1	36	0	52	14	185
20	16075499	G	A	0001	0001	58	0	69	0	43	0	45	10	225
20	16193331	G	C	0111	0111	43	0	38	11	26	11	24	15	168
20	16430382	C	G	0001	0001	67	0	82	0	53	0	67	24	293
20	17850241	C	T	0111	0111	46	0	43	18	20	11	32	15	185
20	20180244	A	G	0010	0010	59	1	73	0	40	8	78	0	259
20	22304571	T	C	0111	0111	36	0	47	22	42	12	25	24	208
20	24293049	C	T	0001	0001	41	0	43	0	39	0	38	9	170
20	32719218	C	T	0001	0001	65	0	71	1	47	0	68	11	263
20	33352275	T	A	0111	0111	50	0	25	6	17	7	20	20	145
20	42450220	A	T	0001	0001	48	0	62	0	51	0	42	10	213
20	43573259	A	C	0111	0111	61	0	43	19	37	18	49	30	257
20	44579460	T	C	0001	0001	24	0	22	0	20	0	22	7	95
20	44887448	C	T	0111	0111	42	0	26	13	24	7	29	19	160
20	46939886	T	C	0001	0001	32	0	40	1	19	0	23	18	133
20	49208796	T	C	0001	0001	32	0	20	0	22	0	42	12	128
20	50555467	T	C	0111	0111	60	0	51	26	46	15	45	25	268
20	51387753	A	G	0111	0111	47	0	51	19	25	13	40	17	212
20	53868905	C	A	0001	0111	37	0	53	2	41	3	27	25	188
20	55645163	C	T	0111	0111	30	0	17	9	19	4	24	11	114
20	57510057	T	C	0001	0001	41	0	60	0	60	0	54	18	233
20	57923985	T	G	0111	0111	51	0	35	12	22	7	20	19	166
20	58158981	C	T	0001	0001	49	0	32	0	23	0	32	13	149
20	60650701	G	A	0111	0111	41	0	60	13	42	20	50	25	251
20	60710566	G	A	0001	0001	38	1	40	0	29	0	24	6	138
21	9827655	G	A	0111	0101	54	0	62	7	55	1	61	2	242
21	20109853	G	A	0111	0111	39	0	63	21	33	15	24	33	228
21	21168929	A	G	0110	0110	85	0	79	10	59	17	94	0	344
21	22639589	T	C	0001	0001	52	0	70	0	65	0	47	17	251
21	23093912	T	C	0001	0001	40	0	61	0	69	0	36	11	217
21	23963472	G	A	0001	0001	59	0	66	0	59	0	32	7	223
21	24540465	C	A	0001	0001	44	0	66	0	40	0	24	12	186
21	24598947	C	G	0111	0111	42	1	52	20	42	18	39	9	223
21	26592348	G	A	0110	0110	42	0	63	12	55	7	46	0	225
21	27258153	C	A	0001	0001	65	0	51	0	37	1	39	12	205
21	29098672	G	A	0001	0001	70	0	50	0	60	0	28	15	223
21	34045396	G	A	0001	0001	24	0	58	0	20	0	21	8	131
21	40104648	A	G	0010	0010	59	0	44	0	29	8	34	0	174
21	43761982	T	C	0111	0111	34	0	40	25	31	15	21	31	197
21	43907178	G	A	0010	0010	59	0	47	0	34	6	43	0	189
21	47301407	G	T	0001	0001	60	0	41	0	21	0	18	7	147
22	24992520	T	C	0110	0110	43	0	27	6	20	2	24	0	122
22	26169351	C	A	0001	0001	21	1	19	1	20	0	14	8	84
22	28710690	C	A	0100	0100	48	0	47	9	41	0	29	0	174
22	31955323	C	T	0111	0111	37	0	32	17	16	6	18	10	136
22	34568588	T	C	0111	0111	46	0	23	16	21	9	15	10	140
22	35044606	G	A	0110	0110	40	0	36	8	38	5	24	0	151
22	39585423	G	T	0111	0111	52	0	22	9	13	8	16	9	129
22	41002154	G	C	0111	0111	32	0	47	8	27	9	22	8	153
22	42339904	C	T	0111	0111	58	0	34	22	25	6	17	8	170
22	42945262	C	T	0001	0001	98	0	88	0	64	0	45	19	314
22	43579317	C	T	0001	0001	44	0	28	0	38	0	19	11	140
22	47308742	C	T	0001	0001	34	0	35	0	32	0	23	9	133
22	47863204	C	T	0111	0111	28	1	28	19	25	12	18	13	144
X	5487765	C	A	0111	0111	59	0	31	14	20	16	7	13	160
X	9344296	G	A	0111	0111	62	0	25	28	15	16	14	30	190
X	16273900	G	T	0001	0101	26	0	33	2	31	0	9	14	115
X	16300759	C	A	0001	0001	69	0	38	0	32	0	21	22	182
X	21335628	C	T	0001	0001	49	0	58	0	33	0	32	14	186
X	21391280	T	G	0100	0100	61	1	40	7	28	0	27	0	164
X	24378145	G	A	0100	0100	43	0	29	6	21	0	38	1	138
X	25368949	C	T	0001	0001	37	0	31	1	24	0	19	9	121
X	27702685	T	G	0001	0001	52	0	59	1	54	0	31	8	205
X	30782358	T	G	0001	0001	53	0	31	0	39	0	27	8	158
X	32338111	C	T	0010	0010	63	0	51	0	24	10	36	0	184
X	56577563	C	T	0111	0111	52	0	28	9	25	14	6	34	168
X	56874156	A	C	0111	0111	58	0	30	18	24	19	14	27	190
X	61729821	G	A	0100	0110	58	1	56	8	38	2	41	1	205
X	61760427	T	A	0111	0111	58	0	38	19	22	21	13	20	191
X	66384632	A	G	0001	0001	45	0	55	0	38	0	25	15	178
X	68536269	A	G	0001	0001	44	0	35	0	24	0	14	7	124
X	71826655	T	C	0001	0001	39	0	50	0	41	0	22	14	166
X	73012926	A	T	0001	0001	40	0	45	0	30	0	18	5	138
X	76114608	A	T	0001	0001	56	0	60	0	27	0	27	15	185
X	81623949	G	C	0111	0111	27	0	31	14	17	8	9	31	137
X	82099156	C	T	0111	0111	59	1	25	18	21	18	6	22	170
X	87595928	C	T	0001	0001	39	0	34	0	30	0	18	14	135
X	90540783	C	T	0111	0111	43	0	33	23	28	17	17	31	192
X	93294463	T	C	0010	0010	46	0	44	0	22	5	34	0	151
X	94970747	G	T	0111	0111	36	0	24	13	16	11	10	24	134
X	95804436	A	G	0001	0001	48	0	46	0	30	0	29	6	159
X	97762427	G	A	0111	0111	50	0	39	21	27	13	16	26	192
X	98237732	T	C	0001	0001	31	0	40	0	27	0	21	10	129
X	101160175	T	A	0110	0110	36	0	28	10	27	7	42	0	150
X	106719117	A	G	0001	0001	29	0	39	0	29	0	21	12	130
X	106942565	T	A	0001	0101	44	0	33	2	24	0	24	14	141
X	110388873	G	A	0111	0111	49	0	33	22	18	10	9	24	165
X	112257602	T	C	0111	0111	51	0	37	21	28	15	16	23	191
X	116500777	C	T	0001	0001	47	0	39	1	38	1	21	9	156
X	117818911	G	A	0111	0111	37	0	46	4	22	5	17	20	151
X	117891086	C	G	0001	0001	45	0	45	0	23	0	26	8	147
X	121734805	A	G	0111	0111	39	0	37	18	24	15	8	37	178
X	130880501	A	G	0001	0001	74	0	63	0	35	0	31	14	217
X	136153765	C	A	0111	0111	57	0	30	17	23	8	10	23	168
X	139518153	T	C	0111	0111	38	0	30	14	19	14	14	27	156
X	149618356	G	A	0111	0111	51	0	19	12	15	7	13	12	129
X	150258057	C	T	0001	0001	51	0	32	1	39	0	19	17	159
X	150397776	C	T	0001	0001	75	0	36	0	35	0	25	8	179
X	151420247	A	T	0001	0001	59	0	56	0	34	0	38	10	197
Y	13446734	G	C	1111	0110	40	1	50	2	38	2	42	1	176

## Sheet: P3
#CHR	POS	REF	ALT	GATK pattern	Rescue pattern	Normal:ref	Normal:alt	CCL:ref	CCL:alt	CCL_cl:ref	CCL_cl:alt	DCIS:ref	DCIS:alt	IDC:ref	IDC:alt	Total Coverage	G	G	G	G	G	R	R	R	R	R	Rescue Diff	Total R
1	812417	A	G	00100	00101	23	0	23	0	25	5	39	1	26	3	145	0	0	1	0	0	0	0	1	0	1	1	2
1	813109	A	C	00110	10111	24	2	36	1	31	4	35	10	28	3	174	0	0	1	1	0	1	0	1	1	1	2	4
1	813112	T	C	00010	00111	23	1	37	1	31	3	33	10	28	3	170	0	0	0	1	0	0	0	1	1	1	2	3
1	4196306	A	G	11010	11010	28	2	47	6	48	1	19	4	36	0	191	1	1	0	1	0	1	1	0	1	0	0	3
1	4890562	C	A	00010	00010	30	0	40	0	33	0	38	6	30	0	177	0	0	0	1	0	0	0	0	1	0	0	1
1	9806188	G	C	00011	00011	31	0	26	0	30	0	28	9	25	9	158	0	0	0	1	1	0	0	0	1	1	0	2
1	10512939	C	T	00100	00100	42	1	42	0	30	6	45	0	28	0	194	0	0	1	0	0	0	0	1	0	0	0	1
1	17250269	C	T	10001	10111	45	6	44	1	33	2	43	3	36	8	221	1	0	0	0	1	1	0	1	1	1	2	4
1	17250324	C	T	10001	10111	46	6	39	1	37	2	53	3	49	8	244	1	0	0	0	1	1	0	1	1	1	2	4
1	17250325	A	G	10001	10111	46	6	37	1	37	2	53	3	47	8	240	1	0	0	0	1	1	0	1	1	1	2	4
1	17355603	T	G	11011	11011	18	3	14	7	19	1	19	9	17	10	117	1	1	0	1	1	1	1	0	1	1	0	4
1	21716399	A	T	00100	00100	32	0	37	0	21	4	38	0	36	0	168	0	0	1	0	0	0	0	1	0	0	0	1
1	22514099	C	T	00011	00011	29	0	28	0	34	0	25	12	24	8	160	0	0	0	1	1	0	0	0	1	1	0	2
1	22700154	G	A	00011	00011	28	1	27	0	47	0	22	7	20	6	158	0	0	0	1	1	0	0	0	1	1	0	2
1	25510257	C	A	10000	10000	36	6	20	0	38	0	45	0	32	0	177	1	0	0	0	0	1	0	0	0	0	0	1
1	26341209	C	G	00011	00011	42	0	24	0	27	0	33	5	39	8	178	0	0	0	1	1	0	0	0	1	1	0	2
1	29753238	C	T	00010	00010	45	0	34	0	39	0	33	8	29	0	188	0	0	0	1	0	0	0	0	1	0	0	1
1	30796517	G	A	00011	00011	26	0	27	0	28	0	24	12	24	10	151	0	0	0	1	1	0	0	0	1	1	0	2
1	31404358	T	A	00011	00011	58	0	38	0	44	0	33	11	25	7	216	0	0	0	1	1	0	0	0	1	1	0	2
1	32000474	G	A	00011	00011	34	0	32	0	25	0	25	10	34	13	173	0	0	0	1	1	0	0	0	1	1	0	2
1	32520788	C	T	00011	00011	43	0	25	0	28	0	24	9	27	10	166	0	0	0	1	1	0	0	0	1	1	0	2
1	33274813	G	C	01000	01000	39	0	34	8	48	0	37	0	62	0	228	0	1	0	0	0	0	1	0	0	0	0	1
1	34684302	C	T	00011	00011	24	0	34	0	32	0	19	8	19	8	144	0	0	0	1	1	0	0	0	1	1	0	2
1	35127182	C	A	00011	00011	45	0	25	0	28	0	28	13	23	8	170	0	0	0	1	1	0	0	0	1	1	0	2
1	35402809	T	A	00011	00011	67	0	68	0	71	0	46	17	30	13	312	0	0	0	1	1	0	0	0	1	1	0	2
1	36589146	G	C	00011	00011	24	0	25	0	35	0	33	10	24	7	158	0	0	0	1	1	0	0	0	1	1	0	2
1	36956743	G	C	00011	00011	33	0	30	0	37	0	23	14	22	4	163	0	0	0	1	1	0	0	0	1	1	0	2
1	37294766	G	A	00011	00011	40	0	32	0	37	0	36	6	22	9	182	0	0	0	1	1	0	0	0	1	1	0	2
1	38913556	G	A	00010	00010	28	0	35	0	50	0	35	6	31	1	186	0	0	0	1	0	0	0	0	1	0	0	1
1	38999191	T	G	00011	00011	47	0	47	0	43	0	34	10	31	7	219	0	0	0	1	1	0	0	0	1	1	0	2
1	39906814	G	A	00011	00011	47	0	45	0	64	1	32	9	29	19	246	0	0	0	1	1	0	0	0	1	1	0	2
1	44793800	C	G	00011	00011	42	1	42	0	53	0	41	11	49	11	250	0	0	0	1	1	0	0	0	1	1	0	2
1	47438438	G	A	00011	00011	46	0	57	0	75	0	41	14	43	16	292	0	0	0	1	1	0	0	0	1	1	0	2
1	47997318	C	T	00010	00010	42	1	20	0	55	1	39	6	40	0	204	0	0	0	1	0	0	0	0	1	0	0	1
1	49378641	C	T	00010	00010	59	0	59	0	75	0	47	8	45	0	293	0	0	0	1	0	0	0	0	1	0	0	1
1	51789769	A	G	00001	00001	57	0	42	0	53	0	56	0	51	10	269	0	0	0	0	1	0	0	0	0	1	0	1
1	51896667	C	T	11000	11000	24	5	25	4	30	1	20	0	29	1	139	1	1	0	0	0	1	1	0	0	0	0	2
1	51902542	T	C	01000	01000	50	0	55	7	54	0	57	0	56	0	279	0	1	0	0	0	0	1	0	0	0	0	1
1	58459296	C	T	00010	00010	44	0	37	0	58	0	48	11	32	0	230	0	0	0	1	0	0	0	0	1	0	0	1
1	58994268	A	C	00001	00011	62	0	69	0	71	0	45	2	54	10	313	0	0	0	0	1	0	0	0	1	1	1	2
1	59312369	T	C	00011	00011	40	0	54	1	49	0	38	7	42	8	239	0	0	0	1	1	0	0	0	1	1	0	2
1	59376981	G	T	00011	00011	51	0	49	0	58	0	40	11	47	12	268	0	0	0	1	1	0	0	0	1	1	0	2
1	60714879	G	A	00100	00100	46	0	42	0	45	10	55	0	51	0	249	0	0	1	0	0	0	0	1	0	0	0	1
1	61087525	C	A	00001	00001	57	0	63	0	64	0	48	0	45	9	286	0	0	0	0	1	0	0	0	0	1	0	1
1	63544104	T	A	10000	10000	41	7	43	0	65	0	62	0	40	0	258	1	0	0	0	0	1	0	0	0	0	0	1
1	66380343	G	A	00011	00011	40	0	58	0	47	1	36	14	38	13	247	0	0	0	1	1	0	0	0	1	1	0	2
1	67523985	C	T	00010	00010	74	0	56	0	72	0	40	9	62	0	313	0	0	0	1	0	0	0	0	1	0	0	1
1	68457053	G	T	00010	00010	46	1	43	0	43	0	26	13	56	1	229	0	0	0	1	0	0	0	0	1	0	0	1
1	72065837	T	C	00001	00001	58	0	69	0	74	0	39	0	56	13	309	0	0	0	0	1	0	0	0	0	1	0	1
1	72553377	G	C	00011	00011	52	0	58	0	36	0	26	11	24	12	219	0	0	0	1	1	0	0	0	1	1	0	2
1	72879339	C	G	00011	00011	67	0	58	0	78	0	32	15	43	15	308	0	0	0	1	1	0	0	0	1	1	0	2
1	73217277	G	A	00011	00011	69	0	78	0	80	1	48	10	40	14	340	0	0	0	1	1	0	0	0	1	1	0	2
1	73330499	G	T	01000	01000	84	0	52	10	61	0	56	0	67	0	330	0	1	0	0	0	0	1	0	0	0	0	1
1	74029173	C	T	00011	00011	66	0	70	0	58	0	39	14	37	21	305	0	0	0	1	1	0	0	0	1	1	0	2
1	75821767	G	A	01000	01000	56	0	42	7	56	0	48	0	53	0	262	0	1	0	0	0	0	1	0	0	0	0	1
1	76394153	C	T	00001	00011	41	0	59	0	66	0	46	2	33	15	262	0	0	0	0	1	0	0	0	1	1	1	2
1	76641031	C	T	00001	00001	75	0	62	1	57	0	46	0	46	7	294	0	0	0	0	1	0	0	0	0	1	0	1
1	78532222	A	T	00011	00011	58	0	69	0	79	0	39	9	57	6	317	0	0	0	1	1	0	0	0	1	1	0	2
1	79036874	G	C	00011	00011	63	0	71	0	71	0	41	18	54	10	328	0	0	0	1	1	0	0	0	1	1	0	2
1	80997177	G	T	00011	00011	71	0	69	0	68	0	45	12	51	13	329	0	0	0	1	1	0	0	0	1	1	0	2
1	81121034	G	A	00011	00011	59	0	79	0	74	0	48	11	49	20	340	0	0	0	1	1	0	0	0	1	1	0	2
1	82423961	A	T	00011	00011	48	0	52	0	58	0	34	17	36	11	256	0	0	0	1	1	0	0	0	1	1	0	2
1	83439122	G	A	10000	10000	25	5	38	1	36	1	47	1	38	1	193	1	0	0	0	0	1	0	0	0	0	0	1
1	85235312	G	T	00011	00011	64	0	62	1	54	0	44	12	45	14	296	0	0	0	1	1	0	0	0	1	1	0	2
1	85810353	C	A	00011	00011	32	0	25	0	44	0	22	10	39	9	181	0	0	0	1	1	0	0	0	1	1	0	2
1	89872298	G	T	01000	01000	57	0	47	10	66	0	39	0	49	0	268	0	1	0	0	0	0	1	0	0	0	0	1
1	91295525	C	T	00011	00011	60	0	65	1	71	0	49	17	45	14	322	0	0	0	1	1	0	0	0	1	1	0	2
1	91642856	G	A	00010	00010	48	0	62	1	58	0	40	10	48	0	267	0	0	0	1	0	0	0	0	1	0	0	1
1	91804988	C	A	00011	00011	47	0	68	0	57	0	41	15	42	9	279	0	0	0	1	1	0	0	0	1	1	0	2
1	92984092	C	T	00010	00010	46	0	55	0	49	0	47	10	52	1	260	0	0	0	1	0	0	0	0	1	0	0	1
1	93045245	T	C	00011	00011	64	0	54	0	75	0	42	13	46	9	303	0	0	0	1	1	0	0	0	1	1	0	2
1	93668507	A	G	00010	00010	48	0	48	0	75	0	41	14	55	0	281	0	0	0	1	0	0	0	0	1	0	0	1
1	97638827	T	C	10010	10010	35	15	38	0	59	0	32	4	34	0	217	1	0	0	1	0	1	0	0	1	0	0	2
1	99002297	G	A	01000	01000	38	1	28	6	46	0	45	0	45	0	209	0	1	0	0	0	0	1	0	0	0	0	1
1	99706508	G	T	00011	00011	65	0	70	0	72	0	40	19	47	12	325	0	0	0	1	1	0	0	0	1	1	0	2
1	100026117	G	A	00100	00100	51	0	64	0	50	10	52	0	54	0	281	0	0	1	0	0	0	0	1	0	0	0	1
1	101922528	C	A	00010	00010	54	0	73	1	89	0	44	7	69	0	337	0	0	0	1	0	0	0	0	1	0	0	1
1	102329162	G	T	00011	00011	60	0	76	1	67	0	36	17	41	12	310	0	0	0	1	1	0	0	0	1	1	0	2
1	102569373	A	C	00010	01010	53	0	73	2	74	0	31	6	48	0	287	0	0	0	1	0	0	1	0	1	0	1	2
1	103571376	C	A	00001	00001	69	0	65	0	72	1	53	1	69	20	350	0	0	0	0	1	0	0	0	0	1	0	1
1	104731245	A	G	01000	01000	75	0	71	15	70	0	55	0	60	0	346	0	1	0	0	0	0	1	0	0	0	0	1
1	105002072	A	T	00011	00011	69	0	69	0	65	0	43	10	33	14	303	0	0	0	1	1	0	0	0	1	1	0	2
1	105076568	C	A	00011	00011	62	0	73	0	67	0	42	13	42	18	317	0	0	0	1	1	0	0	0	1	1	0	2
1	105169706	T	C	01000	01000	72	0	73	13	83	0	57	0	60	0	358	0	1	0	0	0	0	1	0	0	0	0	1
1	106393247	G	A	00011	00011	50	0	39	0	42	0	45	10	25	12	223	0	0	0	1	1	0	0	0	1	1	0	2
1	106833561	C	T	00011	00011	60	0	70	0	70	0	58	21	47	19	345	0	0	0	1	1	0	0	0	1	1	0	2
1	107672762	C	A	00011	00011	27	0	31	0	31	0	26	7	23	13	158	0	0	0	1	1	0	0	0	1	1	0	2
1	107962998	A	T	01000	01000	67	0	48	15	89	0	59	0	72	0	350	0	1	0	0	0	0	1	0	0	0	0	1
1	109798107	T	G	00011	00011	25	0	24	1	31	0	28	10	17	13	149	0	0	0	1	1	0	0	0	1	1	0	2
1	109798126	C	T	00011	00011	25	0	28	0	32	0	24	10	18	11	148	0	0	0	1	1	0	0	0	1	1	0	2
1	110079938	A	T	00101	00101	32	1	35	1	26	3	28	0	29	5	160	0	0	1	0	1	0	0	1	0	1	0	2
1	111042292	G	A	00011	00011	49	0	26	0	27	0	26	10	26	5	169	0	0	0	1	1	0	0	0	1	1	0	2
1	112763219	C	A	00011	00011	49	0	70	1	80	0	35	11	30	10	286	0	0	0	1	1	0	0	0	1	1	0	2
1	117399690	A	G	00011	00011	34	0	47	0	50	0	26	11	35	13	216	0	0	0	1	1	0	0	0	1	1	0	2
1	119146345	G	A	01000	01000	58	0	57	10	55	0	50	0	38	0	268	0	1	0	0	0	0	1	0	0	0	0	1
1	145628141	T	C	00011	00011	55	0	44	0	64	0	55	11	56	11	296	0	0	0	1	1	0	0	0	1	1	0	2
1	146617322	A	G	00100	00100	45	0	76	0	71	9	66	0	79	0	346	0	0	1	0	0	0	0	1	0	0	0	1
1	149070080	G	A	00011	00011	30	0	26	0	23	0	30	14	18	8	149	0	0	0	1	1	0	0	0	1	1	0	2
1	149081061	G	A	01110	01111	30	1	29	4	28	5	50	5	41	3	196	0	1	1	1	0	0	1	1	1	1	1	4
1	149081071	C	T	01100	01111	32	1	35	4	29	5	51	4	47	4	212	0	1	1	0	0	0	1	1	1	1	2	4
1	149095298	G	A	01010	01111	44	1	41	4	56	3	54	7	59	2	271	0	1	0	1	0	0	1	1	1	1	2	4
1	150476121	A	G	11011	11011	28	3	25	3	26	1	17	6	15	7	131	1	1	0	1	1	1	1	0	1	1	0	4
1	150476144	T	C	11011	11011	29	3	27	3	23	0	18	6	16	6	131	1	1	0	1	1	1	1	0	1	1	0	4
1	150930714	C	T	01110	01111	20	1	16	11	13	11	32	12	24	8	148	0	1	1	1	0	0	1	1	1	1	1	4
1	151614394	C	A	10011	10011	41	4	33	0	31	0	23	5	48	8	193	1	0	0	1	1	1	0	0	1	1	0	3
1	153280698	G	A	01000	01000	36	0	25	9	42	0	54	0	57	0	223	0	1	0	0	0	0	1	0	0	0	0	1
1	153797234	G	T	01000	01000	27	0	34	6	33	0	42	0	42	1	185	0	1	0	0	0	0	1	0	0	0	0	1
1	155411742	G	C	00011	00011	37	0	33	0	57	0	58	8	47	8	248	0	0	0	1	1	0	0	0	1	1	0	2
1	155412719	G	T	00011	00011	50	0	67	0	56	0	54	12	56	15	310	0	0	0	1	1	0	0	0	1	1	0	2
1	155412720	G	A	00011	00011	48	0	66	0	56	0	51	12	55	14	302	0	0	0	1	1	0	0	0	1	1	0	2
1	155413483	G	A	00011	00011	63	0	65	0	65	0	46	14	59	16	328	0	0	0	1	1	0	0	0	1	1	0	2
1	155415246	G	C	00001	00011	35	0	37	0	40	0	49	6	42	14	223	0	0	0	0	1	0	0	0	1	1	1	2
1	158370440	C	G	10000	10000	47	7	56	0	67	1	84	1	74	0	337	1	0	0	0	0	1	0	0	0	0	0	1
1	158643700	T	C	01000	01000	52	0	30	8	51	0	55	0	61	0	257	0	1	0	0	0	0	1	0	0	0	0	1
1	161865452	A	G	01000	01000	56	0	57	9	57	0	48	0	80	0	307	0	1	0	0	0	0	1	0	0	0	0	1
1	162163268	A	G	01000	01000	58	0	39	11	46	0	61	0	70	0	285	0	1	0	0	0	0	1	0	0	0	0	1
1	163243087	C	T	00001	00001	53	0	74	0	71	0	70	0	57	10	335	0	0	0	0	1	0	0	0	0	1	0	1
1	166085789	C	T	01000	01000	36	0	38	7	48	0	54	0	44	0	227	0	1	0	0	0	0	1	0	0	0	0	1
1	166105376	T	A	00011	00011	48	0	59	0	65	0	50	13	62	11	308	0	0	0	1	1	0	0	0	1	1	0	2
1	168392154	C	T	00011	00011	54	0	55	0	58	0	65	12	39	25	308	0	0	0	1	1	0	0	0	1	1	0	2
1	169487696	C	A	00010	00010	53	0	53	0	78	0	67	10	96	0	357	0	0	0	1	0	0	0	0	1	0	0	1
1	170399433	A	G	00011	00011	54	0	69	0	66	1	50	17	57	24	338	0	0	0	1	1	0	0	0	1	1	0	2
1	170665919	G	T	00011	00011	69	0	63	0	60	0	54	11	68	21	346	0	0	0	1	1	0	0	0	1	1	0	2
1	173846829	G	C	01000	01000	41	0	49	7	55	0	70	0	66	1	289	0	1	0	0	0	0	1	0	0	0	0	1
1	174992168	C	T	00011	00011	42	0	51	0	52	0	59	21	70	21	316	0	0	0	1	1	0	0	0	1	1	0	2
1	177871523	C	T	00011	00011	43	0	39	0	47	0	53	10	36	13	241	0	0	0	1	1	0	0	0	1	1	0	2
1	181360523	T	C	00100	00100	43	0	36	0	43	6	68	0	66	0	262	0	0	1	0	0	0	0	1	0	0	0	1
1	182174946	C	A	00011	00011	39	1	47	0	43	0	55	7	70	11	273	0	0	0	1	1	0	0	0	1	1	0	2
1	182684127	T	C	00011	00011	54	0	63	0	66	0	50	20	70	18	341	0	0	0	1	1	0	0	0	1	1	0	2
1	187864351	G	C	00001	00001	65	0	76	0	73	0	83	1	75	13	386	0	0	0	0	1	0	0	0	0	1	0	1
1	188907839	C	G	00011	00011	71	0	53	0	66	0	48	15	57	19	329	0	0	0	1	1	0	0	0	1	1	0	2
1	189238527	T	A	00011	00011	60	0	59	0	56	0	36	24	34	30	299	0	0	0	1	1	0	0	0	1	1	0	2
1	189572737	C	T	00100	00100	64	0	76	0	50	11	93	1	83	0	378	0	0	1	0	0	0	0	1	0	0	0	1
1	189948873	T	C	01000	01000	51	0	50	15	53	0	66	0	85	0	320	0	1	0	0	0	0	1	0	0	0	0	1
1	190444702	G	A	00001	00011	53	0	49	0	61	0	62	3	55	9	292	0	0	0	0	1	0	0	0	1	1	1	2
1	191110357	G	A	00011	00011	66	0	66	1	72	0	29	18	54	32	338	0	0	0	1	1	0	0	0	1	1	0	2
1	193631319	C	G	00011	00011	67	0	69	0	70	0	53	19	65	25	368	0	0	0	1	1	0	0	0	1	1	0	2
1	194478077	C	T	01000	01000	63	0	55	10	64	0	78	0	92	0	362	0	1	0	0	0	0	1	0	0	0	0	1
1	195590384	T	A	00011	00011	50	1	48	0	48	0	27	5	41	20	240	0	0	0	1	1	0	0	0	1	1	0	2
1	195776741	T	C	01000	01000	45	0	36	8	58	0	62	0	73	0	282	0	1	0	0	0	0	1	0	0	0	0	1
1	195970850	G	A	00011	01111	53	1	53	2	64	3	65	19	62	21	343	0	0	0	1	1	0	1	1	1	1	2	4
1	198344820	A	G	00011	00011	60	0	50	0	56	0	50	10	53	10	289	0	0	0	1	1	0	0	0	1	1	0	2
1	198715394	A	G	01000	01000	73	0	46	9	55	0	62	0	69	0	314	0	1	0	0	0	0	1	0	0	0	0	1
1	200099998	G	C	00011	00011	51	0	65	0	66	0	57	10	82	15	346	0	0	0	1	1	0	0	0	1	1	0	2
1	201602568	C	A	00011	00011	33	0	31	0	40	0	39	15	42	7	207	0	0	0	1	1	0	0	0	1	1	0	2
1	202955224	C	T	00011	00011	49	0	46	0	51	0	40	20	51	7	264	0	0	0	1	1	0	0	0	1	1	0	2
1	203179151	C	T	00001	00001	58	0	44	0	45	0	68	0	61	21	297	0	0	0	0	1	0	0	0	0	1	0	1
1	207061137	G	A	00011	00011	51	0	62	1	51	0	34	35	51	66	351	0	0	0	1	1	0	0	0	1	1	0	2
1	207864372	G	C	00010	00010	60	0	80	0	55	0	51	17	80	0	343	0	0	0	1	0	0	0	0	1	0	0	1
1	210396109	T	G	00011	00011	55	0	46	0	61	0	56	24	79	13	334	0	0	0	1	1	0	0	0	1	1	0	2
1	210703477	T	G	00100	00100	58	1	66	0	62	9	67	0	108	0	371	0	0	1	0	0	0	0	1	0	0	0	1
1	210742462	A	C	01110	01110	28	1	32	3	31	5	57	7	54	0	218	0	1	1	1	0	0	1	1	1	0	0	3
1	210742469	T	A	01110	01110	27	1	29	3	31	5	57	7	58	0	218	0	1	1	1	0	0	1	1	1	0	0	3
1	210888685	C	T	00001	00011	25	0	29	0	45	0	67	3	41	24	234	0	0	0	0	1	0	0	0	1	1	1	2
1	212093340	A	G	00011	00011	52	0	33	0	41	0	37	10	58	6	237	0	0	0	1	1	0	0	0	1	1	0	2
1	212096696	G	A	00010	00010	50	0	50	0	64	0	60	9	80	0	313	0	0	0	1	0	0	0	0	1	0	0	1
1	213144694	T	C	00011	00011	36	0	46	0	39	0	57	14	52	9	253	0	0	0	1	1	0	0	0	1	1	0	2
1	214580475	T	C	01000	01000	45	0	51	18	63	0	75	0	89	0	341	0	1	0	0	0	0	1	0	0	0	0	1
1	215946723	C	T	00010	00010	47	0	45	0	48	0	51	11	47	0	249	0	0	0	1	0	0	0	0	1	0	0	1
1	216724750	A	C	00011	00011	60	0	83	1	93	0	46	11	62	9	365	0	0	0	1	1	0	0	0	1	1	0	2
1	217468376	G	A	00011	00011	66	0	75	0	67	0	44	13	57	25	347	0	0	0	1	1	0	0	0	1	1	0	2
1	217806506	C	T	00011	00011	55	0	51	0	44	0	35	11	42	14	252	0	0	0	1	1	0	0	0	1	1	0	2
1	218243506	C	T	00011	00011	53	0	55	1	64	0	48	19	73	13	326	0	0	0	1	1	0	0	0	1	1	0	2
1	220091537	C	T	00011	00011	52	0	35	0	66	0	45	26	31	40	295	0	0	0	1	1	0	0	0	1	1	0	2
1	220162239	C	A	00100	00100	58	0	68	0	61	8	69	0	75	1	340	0	0	1	0	0	0	0	1	0	0	0	1
1	220758411	G	A	00011	00011	51	0	74	0	78	0	47	7	64	11	332	0	0	0	1	1	0	0	0	1	1	0	2
1	221212284	G	A	00010	00010	79	1	78	0	65	0	68	13	83	0	387	0	0	0	1	0	0	0	0	1	0	0	1
1	221282989	T	C	01000	01000	72	0	50	7	45	1	47	0	66	0	288	0	1	0	0	0	0	1	0	0	0	0	1
1	221690312	G	C	00011	00011	48	0	60	0	53	0	46	18	63	10	298	0	0	0	1	1	0	0	0	1	1	0	2
1	221944267	G	C	01000	01000	51	0	37	12	64	0	78	0	65	1	308	0	1	0	0	0	0	1	0	0	0	0	1
1	223069771	C	T	00010	00110	49	0	48	0	54	2	72	12	88	0	325	0	0	0	1	0	0	0	1	1	0	1	2
1	225535661	A	G	01000	01000	63	0	66	16	76	0	69	0	91	0	381	0	1	0	0	0	0	1	0	0	0	0	1
1	225654552	A	G	10010	11110	25	3	27	2	44	3	43	6	43	1	197	1	0	0	1	0	1	1	1	1	0	2	4
1	226128033	T	C	01000	01100	29	0	20	6	31	2	46	1	35	1	171	0	1	0	0	0	0	1	1	0	0	1	2
1	228006870	T	A	01000	01000	46	0	56	8	57	0	60	0	66	0	293	0	1	0	0	0	0	1	0	0	0	0	1
1	229514004	A	T	01000	01000	26	0	14	6	30	0	47	0	44	0	167	0	1	0	0	0	0	1	0	0	0	0	1
1	232162566	C	T	11000	11101	28	5	41	5	39	2	47	1	64	4	236	1	1	0	0	0	1	1	1	0	1	2	4
1	232162596	A	G	11000	11101	28	6	51	6	44	2	62	1	68	6	274	1	1	0	0	0	1	1	1	0	1	2	4
1	232162598	G	T	11000	11101	33	5	50	5	45	2	60	1	69	4	274	1	1	0	0	0	1	1	1	0	1	2	4
1	234584856	T	G	00100	01110	23	1	39	4	23	5	47	4	41	1	188	0	0	1	0	0	0	1	1	1	0	2	3
1	235422756	G	A	00011	00011	51	0	63	0	66	0	64	15	38	23	320	0	0	0	1	1	0	0	0	1	1	0	2
1	236195761	T	A	00011	00011	37	0	49	0	38	0	54	12	50	16	256	0	0	0	1	1	0	0	0	1	1	0	2
1	237999337	G	A	00011	00011	52	0	49	0	58	0	57	7	49	13	285	0	0	0	1	1	0	0	0	1	1	0	2
1	238533185	C	T	00011	00011	47	0	56	0	45	0	59	12	37	24	280	0	0	0	1	1	0	0	0	1	1	0	2
1	238995842	C	T	00011	00011	28	0	35	0	46	0	47	16	43	12	227	0	0	0	1	1	0	0	0	1	1	0	2
1	239503529	C	A	00001	00001	45	1	51	1	46	0	49	0	48	13	254	0	0	0	0	1	0	0	0	0	1	0	1
1	239948722	G	A	00001	00001	63	0	58	0	59	0	59	0	63	12	314	0	0	0	0	1	0	0	0	0	1	0	1
1	240676203	G	T	00010	00010	56	0	54	0	70	0	44	10	84	0	318	0	0	0	1	0	0	0	0	1	0	0	1
1	240734696	A	C	01000	01001	50	0	44	12	55	0	66	0	68	2	297	0	1	0	0	0	0	1	0	0	1	1	2
1	240957238	A	G	00011	00011	47	0	52	0	50	0	61	12	49	12	283	0	0	0	1	1	0	0	0	1	1	0	2
1	241779402	C	A	00011	00011	56	0	37	0	52	0	55	14	67	11	292	0	0	0	1	1	0	0	0	1	1	0	2
1	242562519	C	A	00010	00010	51	0	56	0	64	0	49	15	70	0	305	0	0	0	1	0	0	0	0	1	0	0	1
1	242595834	G	T	00001	00001	40	0	54	0	46	0	78	1	46	15	280	0	0	0	0	1	0	0	0	0	1	0	1
1	242633252	C	A	00011	00011	45	0	54	1	60	0	52	18	56	8	294	0	0	0	1	1	0	0	0	1	1	0	2
1	243560277	A	C	01000	01000	67	0	54	7	63	0	85	0	95	0	371	0	1	0	0	0	0	1	0	0	0	0	1
1	243564004	A	G	00011	00011	51	0	56	0	74	0	64	13	77	30	365	0	0	0	1	1	0	0	0	1	1	0	2
1	246534049	A	T	00011	00011	60	1	73	0	61	0	54	19	62	25	355	0	0	0	1	1	0	0	0	1	1	0	2
1	247818053	T	A	00100	00100	55	0	60	0	54	10	54	0	87	0	320	0	0	1	0	0	0	0	1	0	0	0	1
1	248473800	T	A	00010	00010	61	0	80	0	63	0	72	16	95	0	387	0	0	0	1	0	0	0	0	1	0	0	1
1	249083034	C	G	00011	00011	43	0	36	0	39	0	28	25	31	21	223	0	0	0	1	1	0	0	0	1	1	0	2
1	249116329	G	A	00010	00011	37	0	30	0	37	0	40	8	45	6	203	0	0	0	1	0	0	0	0	1	1	1	2
2	1207419	C	T	00011	00011	45	0	44	0	55	0	45	10	28	8	235	0	0	0	1	1	0	0	0	1	1	0	2
2	1276114	G	A	00011	00011	28	0	41	0	40	0	23	12	18	7	169	0	0	0	1	1	0	0	0	1	1	0	2
2	1562431	C	T	01100	01110	36	1	41	4	44	7	46	3	39	1	222	0	1	1	0	0	0	1	1	1	0	1	3
2	2178721	C	T	00011	00011	52	0	49	0	37	0	31	7	24	6	206	0	0	0	1	1	0	0	0	1	1	0	2
2	2229221	C	T	00011	00011	38	0	38	0	32	0	28	13	22	11	182	0	0	0	1	1	0	0	0	1	1	0	2
2	2397038	A	T	11011	11011	26	5	34	5	34	1	38	4	31	7	185	1	1	0	1	1	1	1	0	1	1	0	4
2	2694283	G	T	00011	00011	27	0	20	0	23	0	27	9	22	4	132	0	0	0	1	1	0	0	0	1	1	0	2
2	4061884	C	A	00010	00010	31	0	40	0	37	0	41	10	36	0	195	0	0	0	1	0	0	0	0	1	0	0	1
2	6510814	A	G	01000	01000	78	1	63	8	61	0	65	1	66	0	343	0	1	0	0	0	0	1	0	0	0	0	1
2	9561944	T	C	00010	00010	32	0	33	0	41	0	40	7	38	0	191	0	0	0	1	0	0	0	0	1	0	0	1
2	11017253	G	A	00011	00011	40	1	37	0	48	1	27	10	31	11	206	0	0	0	1	1	0	0	0	1	1	0	2
2	11758294	G	C	00100	01100	31	0	31	2	29	5	51	1	27	0	177	0	0	1	0	0	0	1	1	0	0	1	2
2	11815804	G	A	01000	01000	37	0	32	5	41	0	45	0	43	0	203	0	1	0	0	0	0	1	0	0	0	0	1
2	11910600	G	C	00011	00011	28	0	32	0	31	0	33	7	23	6	160	0	0	0	1	1	0	0	0	1	1	0	2
2	13331415	C	A	00011	00011	51	0	48	0	47	0	42	15	25	4	232	0	0	0	1	1	0	0	0	1	1	0	2
2	13459616	G	T	00010	00010	65	0	64	0	51	0	36	8	45	1	270	0	0	0	1	0	0	0	0	1	0	0	1
2	13538840	A	T	10000	10000	61	10	71	0	68	1	66	1	42	0	320	1	0	0	0	0	1	0	0	0	0	0	1
2	14412945	T	C	00011	00011	73	0	67	0	70	0	32	19	35	7	303	0	0	0	1	1	0	0	0	1	1	0	2
2	14657366	A	T	00011	00011	45	1	40	0	53	0	35	21	32	8	235	0	0	0	1	1	0	0	0	1	1	0	2
2	16426900	A	G	01000	01000	32	0	29	5	40	0	45	0	35	0	186	0	1	0	0	0	0	1	0	0	0	0	1
2	16526710	G	A	10000	10100	36	6	41	1	44	2	40	1	50	0	221	1	0	0	0	0	1	0	1	0	0	1	2
2	16911056	C	T	00001	10001	55	2	54	0	77	0	47	0	54	9	298	0	0	0	0	1	1	0	0	0	1	1	2
2	17036534	T	A	00011	00011	40	0	40	0	34	0	32	9	18	3	176	0	0	0	1	1	0	0	0	1	1	0	2
2	19021162	G	A	01000	01000	50	0	40	11	56	1	48	0	46	0	252	0	1	0	0	0	0	1	0	0	0	0	1
2	21396110	G	A	00011	00011	55	0	40	0	50	0	44	12	41	6	248	0	0	0	1	1	0	0	0	1	1	0	2
2	21607899	C	T	00011	00011	47	0	49	0	42	0	48	12	33	8	239	0	0	0	1	1	0	0	0	1	1	0	2
2	24965784	C	G	00011	00011	69	0	70	0	62	0	43	15	34	6	299	0	0	0	1	1	0	0	0	1	1	0	2
2	26616451	G	T	00011	00011	71	0	61	0	51	0	39	12	33	9	276	0	0	0	1	1	0	0	0	1	1	0	2
2	27509952	G	T	00011	00011	39	0	49	0	41	0	33	24	29	12	227	0	0	0	1	1	0	0	0	1	1	0	2
2	29251787	C	T	00011	00011	43	0	36	0	46	0	36	20	28	10	219	0	0	0	1	1	0	0	0	1	1	0	2
2	29703908	G	A	00011	00011	38	0	38	0	35	0	41	15	21	5	193	0	0	0	1	1	0	0	0	1	1	0	2
2	29768380	C	G	00011	00011	41	0	51	0	51	0	42	14	29	9	237	0	0	0	1	1	0	0	0	1	1	0	2
2	29841654	G	T	11001	11011	41	5	28	3	42	1	50	3	27	4	204	1	1	0	0	1	1	1	0	1	1	1	4
2	29841660	T	A	01001	11011	40	3	24	3	43	1	41	3	28	4	190	0	1	0	0	1	1	1	0	1	1	2	4
2	30151381	C	T	00011	00011	57	1	40	0	60	0	33	19	45	11	266	0	0	0	1	1	0	0	0	1	1	0	2
2	31923697	T	C	01000	01000	35	0	36	9	45	0	60	1	30	0	216	0	1	0	0	0	0	1	0	0	0	0	1
2	32373315	A	G	00011	00011	53	0	45	0	57	0	28	14	35	11	243	0	0	0	1	1	0	0	0	1	1	0	2
2	32778324	T	C	00011	00011	35	0	36	0	37	0	30	11	25	8	182	0	0	0	1	1	0	0	0	1	1	0	2
2	34590343	C	T	00001	00011	66	1	55	0	79	0	54	3	43	9	310	0	0	0	0	1	0	0	0	1	1	1	2
2	36581835	C	A	00011	00011	50	0	48	0	53	0	32	15	31	6	235	0	0	0	1	1	0	0	0	1	1	0	2
2	37806669	G	T	01000	01000	47	0	42	12	58	0	64	0	67	0	290	0	1	0	0	0	0	1	0	0	0	0	1
2	39857329	C	G	00100	00100	45	0	44	0	40	7	37	0	39	0	212	0	0	1	0	0	0	0	1	0	0	0	1
2	40613818	A	G	00011	00011	67	0	67	0	60	0	37	7	47	13	298	0	0	0	1	1	0	0	0	1	1	0	2
2	44729362	A	T	00011	00011	58	0	63	0	55	0	36	16	47	11	286	0	0	0	1	1	0	0	0	1	1	0	2
2	46264830	G	C	01000	01000	49	0	46	11	47	0	54	0	62	0	269	0	1	0	0	0	0	1	0	0	0	0	1
2	47009624	C	T	00011	00011	38	0	40	0	52	0	32	11	30	9	212	0	0	0	1	1	0	0	0	1	1	0	2
2	49176186	G	T	00010	00010	37	0	46	0	56	0	47	11	37	0	234	0	0	0	1	0	0	0	0	1	0	0	1
2	50950981	T	A	00010	00010	64	0	85	0	81	0	51	11	58	0	350	0	0	0	1	0	0	0	0	1	0	0	1
2	54411786	A	G	00011	00011	46	0	59	0	59	0	41	16	33	7	261	0	0	0	1	1	0	0	0	1	1	0	2
2	59777597	A	G	00001	00001	42	0	50	0	58	0	37	0	34	13	234	0	0	0	0	1	0	0	0	0	1	0	1
2	60073198	C	T	00010	00010	46	1	48	0	45	1	43	21	40	0	245	0	0	0	1	0	0	0	0	1	0	0	1
2	62018296	G	C	01000	01000	32	0	23	6	41	0	48	0	27	0	177	0	1	0	0	0	0	1	0	0	0	0	1
2	63443694	T	C	00010	00010	48	0	56	0	56	0	32	6	51	0	249	0	0	0	1	0	0	0	0	1	0	0	1
2	64063618	G	A	00010	00010	74	0	73	1	65	0	48	11	61	0	333	0	0	0	1	0	0	0	0	1	0	0	1
2	65922360	G	T	00011	00011	30	0	48	0	47	1	43	10	32	9	220	0	0	0	1	1	0	0	0	1	1	0	2
2	66818040	C	T	01000	01000	52	0	43	10	52	0	33	0	28	0	218	0	1	0	0	0	0	1	0	0	0	0	1
2	71112611	G	A	00011	00011	40	0	48	0	47	0	35	15	42	10	237	0	0	0	1	1	0	0	0	1	1	0	2
2	74660096	C	T	00001	00001	30	0	32	0	29	0	40	0	19	8	158	0	0	0	0	1	0	0	0	0	1	0	1
2	76662854	A	G	00001	00001	50	0	66	0	59	0	58	1	45	14	293	0	0	0	0	1	0	0	0	0	1	0	1
2	78828983	C	A	00011	00011	58	0	60	1	71	0	30	12	37	15	284	0	0	0	1	1	0	0	0	1	1	0	2
2	79026663	C	A	00010	00010	68	1	72	0	81	0	48	7	56	1	334	0	0	0	1	0	0	0	0	1	0	0	1
2	79722007	C	T	00010	00010	62	0	70	0	67	0	48	12	49	0	308	0	0	0	1	0	0	0	0	1	0	0	1
2	79975974	C	T	00011	00011	59	0	35	0	42	0	29	10	26	14	215	0	0	0	1	1	0	0	0	1	1	0	2
2	80431910	T	C	00110	10110	40	2	43	1	34	5	47	4	32	0	208	0	0	1	1	0	1	0	1	1	0	1	3
2	81107954	C	T	00011	00011	44	0	57	0	56	0	35	8	36	9	245	0	0	0	1	1	0	0	0	1	1	0	2
2	81418463	T	A	00011	00011	46	1	52	0	47	0	31	9	29	8	223	0	0	0	1	1	0	0	0	1	1	0	2
2	82950476	C	A	00011	00011	76	0	61	0	73	0	43	15	50	10	328	0	0	0	1	1	0	0	0	1	1	0	2
2	83151126	C	T	01000	01000	70	0	61	9	70	0	62	0	61	0	333	0	1	0	0	0	0	1	0	0	0	0	1
2	85723363	C	G	00011	00011	37	0	47	0	47	0	37	12	38	11	229	0	0	0	1	1	0	0	0	1	1	0	2
2	92148867	G	C	01100	01111	36	1	34	4	29	4	35	2	41	4	190	0	1	1	0	0	0	1	1	1	1	2	4
2	95570399	C	T	11100	11110	35	5	47	10	44	5	33	2	29	1	211	1	1	1	0	0	1	1	1	1	0	1	4
2	95587139	T	A	00011	01011	49	0	39	2	59	1	35	5	31	4	225	0	0	0	1	1	0	1	0	1	1	1	3
2	95587172	C	A	00011	01111	36	0	45	2	47	2	40	5	39	6	222	0	0	0	1	1	0	1	1	1	1	2	4
2	98686724	G	A	00011	00011	33	0	33	0	35	0	36	10	18	13	178	0	0	0	1	1	0	0	0	1	1	0	2
2	100573955	T	C	00010	00011	58	0	59	1	58	0	34	18	33	3	264	0	0	0	1	0	0	0	0	1	1	1	2
2	102608774	A	G	01110	01111	30	0	32	10	31	10	28	7	17	6	171	0	1	1	1	0	0	1	1	1	1	1	4
2	102608788	G	C	00110	01111	32	0	34	2	34	6	31	5	19	2	165	0	0	1	1	0	0	1	1	1	1	2	4
2	102613176	A	T	01000	01000	64	0	34	11	38	0	44	0	43	0	234	0	1	0	0	0	0	1	0	0	0	0	1
2	103544184	C	T	00011	00011	63	1	60	0	59	0	44	24	38	11	300	0	0	0	1	1	0	0	0	1	1	0	2
2	103701693	C	T	00001	00001	62	0	71	0	54	0	64	0	40	9	300	0	0	0	0	1	0	0	0	0	1	0	1
2	104134621	C	G	00011	00011	49	0	42	1	50	0	31	7	25	8	213	0	0	0	1	1	0	0	0	1	1	0	2
2	104165362	C	T	00010	00010	52	0	82	0	58	0	55	9	61	0	317	0	0	0	1	0	0	0	0	1	0	0	1
2	108056715	T	G	01000	01000	66	0	60	13	73	0	59	0	41	1	313	0	1	0	0	0	0	1	0	0	0	0	1
2	110978363	T	G	00100	10101	51	3	47	1	37	6	36	1	31	2	215	0	0	1	0	0	1	0	1	0	1	2	3
2	110978396	A	G	10101	10101	38	3	35	1	28	6	24	1	26	2	164	1	0	1	0	1	1	0	1	0	1	0	3
2	111730580	G	A	00010	00010	39	0	35	0	50	0	35	7	24	0	190	0	0	0	1	0	0	0	0	1	0	0	1
2	115768698	C	T	00011	00011	69	0	67	0	60	0	45	12	43	14	310	0	0	0	1	1	0	0	0	1	1	0	2
2	117233476	C	A	00011	00011	50	0	40	0	53	0	33	7	48	12	243	0	0	0	1	1	0	0	0	1	1	0	2
2	117303207	G	C	00010	00010	52	0	68	0	45	0	55	10	52	0	282	0	0	0	1	0	0	0	0	1	0	0	1
2	117422255	C	T	00010	00010	64	0	59	0	72	0	53	7	56	0	311	0	0	0	1	0	0	0	0	1	0	0	1
2	117834352	C	G	01001	01011	35	1	30	6	30	1	25	2	21	3	154	0	1	0	0	1	0	1	0	1	1	1	3
2	117995463	C	A	01000	01000	48	0	68	12	74	1	57	0	53	0	313	0	1	0	0	0	0	1	0	0	0	0	1
2	119184419	C	A	00011	01011	56	0	45	2	41	0	36	16	22	5	223	0	0	0	1	1	0	1	0	1	1	1	3
2	119204798	G	A	00011	00011	61	0	59	0	72	1	42	15	37	13	300	0	0	0	1	1	0	0	0	1	1	0	2
2	119226684	C	A	00010	00010	39	0	41	0	41	0	26	11	32	0	190	0	0	0	1	0	0	0	0	1	0	0	1
2	119399613	A	G	01000	01000	39	1	33	7	43	0	44	0	48	0	215	0	1	0	0	0	0	1	0	0	0	0	1
2	119506897	C	T	00011	00011	46	0	40	0	55	0	33	9	29	8	220	0	0	0	1	1	0	0	0	1	1	0	2
2	123709866	C	T	00100	00100	63	0	65	1	64	9	54	0	46	0	302	0	0	1	0	0	0	0	1	0	0	0	1
2	124246818	C	T	00100	00100	52	0	70	0	49	7	78	0	67	1	324	0	0	1	0	0	0	0	1	0	0	0	1
2	125225086	A	T	00011	00011	37	0	48	1	35	1	32	14	35	8	211	0	0	0	1	1	0	0	0	1	1	0	2
2	125406149	T	C	00010	00010	60	0	52	0	60	0	53	9	54	0	288	0	0	0	1	0	0	0	0	1	0	0	1
2	125856086	T	C	00011	00011	52	0	66	0	62	0	34	13	37	8	272	0	0	0	1	1	0	0	0	1	1	0	2
2	130739699	C	T	00101	00101	33	1	44	1	35	8	49	1	44	4	220	0	0	1	0	1	0	0	1	0	1	0	2
2	133015353	G	A	01110	11110	40	2	47	6	47	4	70	7	51	1	275	0	1	1	1	0	1	1	1	1	0	1	4
2	133031845	T	C	01100	11100	39	3	31	5	33	5	44	1	31	1	193	0	1	1	0	0	1	1	1	0	0	1	3
2	133031860	G	A	11100	11100	37	4	30	5	38	5	51	1	34	1	206	1	1	1	0	0	1	1	1	0	0	0	3
2	133036675	A	G	00001	11011	37	2	45	5	40	1	63	6	35	9	243	0	0	0	0	1	1	1	0	1	1	3	4
2	134618541	A	G	00010	00010	43	0	40	0	51	0	32	6	49	0	221	0	0	0	1	0	0	0	0	1	0	0	1
2	136582044	A	G	10000	10100	24	4	31	0	42	2	43	1	28	0	175	1	0	0	0	0	1	0	1	0	0	1	2
2	139349684	G	A	00010	00011	53	1	61	0	79	0	44	17	61	5	321	0	0	0	1	0	0	0	0	1	1	1	2
2	139666249	T	G	00011	00011	93	0	83	0	66	1	34	17	34	7	335	0	0	0	1	1	0	0	0	1	1	0	2
2	140429329	T	C	00010	00010	42	1	36	0	42	0	28	7	27	0	183	0	0	0	1	0	0	0	0	1	0	0	1
2	145540564	T	A	00010	00010	63	0	79	0	78	0	48	9	59	0	336	0	0	0	1	0	0	0	0	1	0	0	1
2	146252431	T	A	00010	00011	68	0	65	1	63	0	39	13	41	5	295	0	0	0	1	0	0	0	0	1	1	1	2
2	147220040	A	T	00011	10011	60	2	69	0	99	0	54	23	46	11	364	0	0	0	1	1	1	0	0	1	1	1	3
2	151980736	G	A	00011	00011	73	0	60	0	64	0	37	8	37	23	302	0	0	0	1	1	0	0	0	1	1	0	2
2	156038884	G	A	01000	01000	42	1	39	11	72	0	56	0	65	0	286	0	1	0	0	0	0	1	0	0	0	0	1
2	156361188	G	T	00011	00011	70	0	58	1	71	0	42	15	32	3	292	0	0	0	1	1	0	0	0	1	1	0	2
2	157815444	T	C	01000	01000	42	0	34	12	45	0	58	0	34	0	225	0	1	0	0	0	0	1	0	0	0	0	1
2	158014570	C	A	01000	01000	53	0	60	9	84	0	70	1	62	0	339	0	1	0	0	0	0	1	0	0	0	0	1
2	163374221	A	T	00010	00011	59	0	58	0	73	0	34	14	35	4	277	0	0	0	1	0	0	0	0	1	1	1	2
2	163979318	C	T	01000	01000	59	0	67	12	81	0	51	0	68	0	338	0	1	0	0	0	0	1	0	0	0	0	1
2	165360804	A	T	00011	00011	50	0	77	0	75	0	45	15	29	14	305	0	0	0	1	1	0	0	0	1	1	0	2
2	165904231	G	T	00011	00011	38	0	27	0	44	0	31	10	34	9	193	0	0	0	1	1	0	0	0	1	1	0	2
2	166035708	G	T	00010	00010	71	0	83	1	72	0	60	9	49	0	345	0	0	0	1	0	0	0	0	1	0	0	1
2	166954675	T	C	00011	00011	50	0	60	0	67	0	25	15	38	21	276	0	0	0	1	1	0	0	0	1	1	0	2
2	167433186	C	A	00010	00010	77	0	61	0	70	0	50	11	42	1	312	0	0	0	1	0	0	0	0	1	0	0	1
2	168365778	C	T	00011	00011	66	0	61	0	84	0	46	9	52	10	328	0	0	0	1	1	0	0	0	1	1	0	2
2	168450218	G	A	01000	01000	51	0	55	8	51	0	57	0	44	0	266	0	1	0	0	0	0	1	0	0	0	0	1
2	169290841	G	A	00011	00011	58	0	50	0	62	0	39	15	28	7	259	0	0	0	1	1	0	0	0	1	1	0	2
2	170559644	C	T	00011	00011	75	0	68	1	70	0	48	13	58	8	341	0	0	0	1	1	0	0	0	1	1	0	2
2	170798036	C	A	00011	00011	46	0	65	0	83	0	37	7	32	5	275	0	0	0	1	1	0	0	0	1	1	0	2
2	171137314	C	T	00011	00011	68	0	63	0	62	0	38	13	42	10	296	0	0	0	1	1	0	0	0	1	1	0	2
2	171530283	C	T	00011	00011	68	0	67	0	54	0	45	19	39	16	308	0	0	0	1	1	0	0	0	1	1	0	2
2	172231231	T	A	00011	00011	34	0	51	0	57	0	49	20	32	5	248	0	0	0	1	1	0	0	0	1	1	0	2
2	172757965	G	A	00011	00011	68	0	58	0	69	0	35	15	56	15	316	0	0	0	1	1	0	0	0	1	1	0	2
2	173101320	C	T	00001	00001	42	0	49	0	55	0	69	0	25	10	250	0	0	0	0	1	0	0	0	0	1	0	1
2	174945308	T	A	00011	00011	74	0	81	0	92	0	39	15	49	13	363	0	0	0	1	1	0	0	0	1	1	0	2
2	176382847	G	C	00100	00100	52	0	63	0	62	9	55	0	48	0	289	0	0	1	0	0	0	0	1	0	0	0	1
2	176572465	T	G	00011	00011	54	0	53	0	54	0	42	15	32	5	255	0	0	0	1	1	0	0	0	1	1	0	2
2	176814737	T	C	00100	01100	67	0	86	2	71	9	67	0	50	0	352	0	0	1	0	0	0	1	1	0	0	1	2
2	178018046	C	T	00010	00010	64	0	85	0	74	0	53	11	57	0	344	0	0	0	1	0	0	0	0	1	0	0	1
2	178107066	A	C	00010	00010	99	0	70	0	74	0	48	9	82	0	382	0	0	0	1	0	0	0	0	1	0	0	1
2	178588340	T	G	01000	01000	47	0	45	10	67	0	60	0	73	0	302	0	1	0	0	0	0	1	0	0	0	0	1
2	179500957	G	A	00010	00010	54	0	61	0	66	0	56	12	50	0	299	0	0	0	1	0	0	0	0	1	0	0	1
2	180735007	G	A	00011	00011	50	0	58	0	57	0	42	10	40	6	263	0	0	0	1	1	0	0	0	1	1	0	2
2	181743745	C	T	00100	00100	75	0	73	0	70	9	49	0	55	0	331	0	0	1	0	0	0	0	1	0	0	0	1
2	182138816	A	G	00100	00100	60	0	82	0	64	11	67	0	55	0	339	0	0	1	0	0	0	0	1	0	0	0	1
2	182277073	A	C	01000	01000	54	0	57	12	61	0	50	0	42	0	276	0	1	0	0	0	0	1	0	0	0	0	1
2	183799597	T	A	00011	00011	57	0	54	0	73	0	34	7	33	13	271	0	0	0	1	1	0	0	0	1	1	0	2
2	184720311	A	G	00010	00010	47	0	51	0	60	0	39	11	48	0	256	0	0	0	1	0	0	0	0	1	0	0	1
2	185654456	C	A	01000	01000	82	0	59	17	83	0	61	0	56	0	358	0	1	0	0	0	0	1	0	0	0	0	1
2	187272440	T	C	00011	00011	68	0	67	1	71	0	45	17	39	11	319	0	0	0	1	1	0	0	0	1	1	0	2
2	188185437	C	G	00011	00011	57	0	60	0	60	0	46	21	37	4	285	0	0	0	1	1	0	0	0	1	1	0	2
2	189921728	C	T	00100	00100	78	0	72	0	75	9	61	0	65	0	360	0	0	1	0	0	0	0	1	0	0	0	1
2	190505904	G	C	00011	00011	71	0	72	0	73	0	37	19	52	20	344	0	0	0	1	1	0	0	0	1	1	0	2
2	191029704	G	A	01000	01000	81	0	72	10	65	0	49	0	58	1	336	0	1	0	0	0	0	1	0	0	0	0	1
2	192039431	T	C	00100	00100	56	0	75	0	86	10	62	0	59	0	348	0	0	1	0	0	0	0	1	0	0	0	1
2	193129235	C	A	00011	00011	62	0	75	0	76	0	37	13	41	6	310	0	0	0	1	1	0	0	0	1	1	0	2
2	193371977	G	A	00011	00011	33	0	37	0	43	0	35	18	28	6	200	0	0	0	1	1	0	0	0	1	1	0	2
2	193516097	A	T	00011	00011	57	0	73	0	61	0	39	17	32	12	291	0	0	0	1	1	0	0	0	1	1	0	2
2	194115270	C	A	00011	00011	65	0	71	1	82	0	35	17	55	13	339	0	0	0	1	1	0	0	0	1	1	0	2
2	195250223	G	A	10100	11110	63	9	56	3	46	6	64	3	49	1	300	1	0	1	0	0	1	1	1	1	0	2	4
2	197239428	C	G	01000	01000	41	0	40	12	62	0	58	0	45	0	258	0	1	0	0	0	0	1	0	0	0	0	1
2	202463719	A	G	00011	00011	31	0	44	0	40	0	35	10	25	8	193	0	0	0	1	1	0	0	0	1	1	0	2
2	202466336	C	T	01000	01000	61	0	49	7	74	0	54	0	53	0	298	0	1	0	0	0	0	1	0	0	0	0	1
2	202952666	G	A	00010	00010	38	0	41	0	45	0	25	8	41	0	198	0	0	0	1	0	0	0	0	1	0	0	1
2	203019745	T	C	00011	00011	52	0	44	0	59	0	40	18	37	17	267	0	0	0	1	1	0	0	0	1	1	0	2
2	204552977	G	A	10010	11011	29	4	48	4	52	0	34	7	43	3	224	1	0	0	1	0	1	1	0	1	1	2	4
2	206763262	T	C	11101	11101	34	11	35	15	45	8	49	1	43	5	246	1	1	1	0	1	1	1	1	0	1	0	4
2	207479142	G	C	01000	11000	33	2	25	8	37	0	44	0	32	0	181	0	1	0	0	0	1	1	0	0	0	1	2
2	209118680	T	A	00011	00011	50	0	55	0	43	0	46	20	44	15	273	0	0	0	1	1	0	0	0	1	1	0	2
2	211561365	G	A	00010	00010	52	0	63	0	75	0	43	14	52	0	299	0	0	0	1	0	0	0	0	1	0	0	1
2	213777636	C	T	01000	01000	67	0	46	15	55	0	54	0	64	1	302	0	1	0	0	0	0	1	0	0	0	0	1
2	213995530	T	C	00011	00011	62	0	82	0	81	0	45	20	49	13	352	0	0	0	1	1	0	0	0	1	1	0	2
2	215599373	T	C	00011	00011	67	0	74	0	66	0	41	16	40	15	319	0	0	0	1	1	0	0	0	1	1	0	2
2	215838511	C	A	00011	00011	59	0	68	0	84	0	32	13	50	8	314	0	0	0	1	1	0	0	0	1	1	0	2
2	216030550	G	C	01000	01000	47	0	56	14	66	0	66	0	65	0	314	0	1	0	0	0	0	1	0	0	0	0	1
2	216313747	T	C	01000	01000	37	0	48	7	48	0	54	0	44	0	238	0	1	0	0	0	0	1	0	0	0	0	1
2	216838365	C	G	00011	00011	53	0	45	0	76	0	41	28	32	20	295	0	0	0	1	1	0	0	0	1	1	0	2
2	217210276	G	A	00011	00011	29	0	27	0	45	0	25	13	31	5	175	0	0	0	1	1	0	0	0	1	1	0	2
2	218681176	G	A	00011	00011	40	0	38	0	29	0	18	8	25	3	161	0	0	0	1	1	0	0	0	1	1	0	2
2	219766644	C	T	00110	10110	26	4	24	1	15	7	26	4	22	0	129	0	0	1	1	0	1	0	1	1	0	1	3
2	220193422	T	C	00010	00010	32	0	30	0	46	1	26	6	32	0	173	0	0	0	1	0	0	0	0	1	0	0	1
2	223793179	A	T	00100	00100	47	0	50	0	47	10	73	0	40	0	267	0	0	1	0	0	0	0	1	0	0	0	1
2	224438691	G	A	00011	00011	33	0	50	0	46	0	35	6	34	9	213	0	0	0	1	1	0	0	0	1	1	0	2
2	226377531	T	C	01111	01111	37	1	27	3	37	8	19	2	22	2	158	0	1	1	1	1	0	1	1	1	1	0	4
2	227788998	C	G	00011	00011	41	0	53	0	61	0	41	15	30	10	251	0	0	0	1	1	0	0	0	1	1	0	2
2	228695694	G	A	00010	00010	28	0	37	0	40	0	41	7	47	0	200	0	0	0	1	0	0	0	0	1	0	0	1
2	232141362	A	G	00010	00011	39	0	43	0	45	0	35	11	36	2	211	0	0	0	1	0	0	0	0	1	1	1	2
2	232250172	C	T	00011	00011	27	0	39	0	48	1	34	9	25	15	198	0	0	0	1	1	0	0	0	1	1	0	2
2	233958942	G	A	00011	00011	42	0	39	0	42	0	29	17	26	6	201	0	0	0	1	1	0	0	0	1	1	0	2
3	351790	A	G	00011	00011	40	0	61	0	57	0	40	8	40	19	265	0	0	0	1	1	0	0	0	1	1	0	2
3	516322	G	A	00010	00010	60	0	55	0	45	0	37	12	54	1	264	0	0	0	1	0	0	0	0	1	0	0	1
3	2996507	G	T	00001	00001	60	0	54	0	53	0	40	0	35	7	249	0	0	0	0	1	0	0	0	0	1	0	1
3	3880678	A	C	00001	00001	69	0	76	0	70	0	61	0	41	11	328	0	0	0	0	1	0	0	0	0	1	0	1
3	4159648	T	C	01000	01000	30	0	44	10	50	1	41	0	44	0	220	0	1	0	0	0	0	1	0	0	0	0	1
3	4400809	G	A	00011	00011	44	0	53	0	58	0	39	16	31	3	244	0	0	0	1	1	0	0	0	1	1	0	2
3	4467337	A	C	00011	00011	52	0	62	0	67	0	42	13	46	6	288	0	0	0	1	1	0	0	0	1	1	0	2
3	5003658	A	C	00010	00010	62	0	55	0	56	0	52	8	46	1	280	0	0	0	1	0	0	0	0	1	0	0	1
3	6595330	G	A	00011	00011	50	0	53	0	53	0	31	20	36	9	252	0	0	0	1	1	0	0	0	1	1	0	2
3	7266594	G	T	00011	00011	63	0	65	0	74	0	42	18	56	8	326	0	0	0	1	1	0	0	0	1	1	0	2
3	8669524	C	T	00011	00011	28	0	34	0	26	0	28	9	32	5	162	0	0	0	1	1	0	0	0	1	1	0	2
3	9044740	G	C	00011	00011	51	0	55	0	70	0	59	13	27	9	284	0	0	0	1	1	0	0	0	1	1	0	2
3	9296617	G	A	00010	11011	32	2	23	2	29	1	22	6	19	3	139	0	0	0	1	0	1	1	0	1	1	3	4
3	9901414	T	C	00101	10111	32	3	26	1	25	3	35	3	27	6	161	0	0	1	0	1	1	0	1	1	1	2	4
3	11486298	G	A	01000	01000	68	0	62	10	83	0	59	0	65	0	347	0	1	0	0	0	0	1	0	0	0	0	1
3	12704526	C	T	01000	01000	43	0	21	8	56	0	53	0	41	0	222	0	1	0	0	0	0	1	0	0	0	0	1
3	13314348	G	A	00011	00011	20	0	27	0	30	0	39	17	17	8	158	0	0	0	1	1	0	0	0	1	1	0	2
3	14469776	C	T	00011	00011	36	0	32	0	42	0	21	8	19	15	173	0	0	0	1	1	0	0	0	1	1	0	2
3	19589339	C	A	00001	00001	57	0	62	0	49	0	58	0	37	10	273	0	0	0	0	1	0	0	0	0	1	0	1
3	19807495	G	T	00011	00011	61	0	56	0	61	0	48	14	47	10	297	0	0	0	1	1	0	0	0	1	1	0	2
3	20006538	C	T	00011	00011	33	0	44	0	45	0	41	6	34	8	211	0	0	0	1	1	0	0	0	1	1	0	2
3	21694399	C	T	00011	00011	60	0	75	0	73	0	42	13	39	13	315	0	0	0	1	1	0	0	0	1	1	0	2
3	25136598	G	A	00011	00011	46	0	39	0	46	0	36	15	28	8	218	0	0	0	1	1	0	0	0	1	1	0	2
3	25226643	T	A	00001	00001	63	0	75	0	94	1	44	0	49	10	336	0	0	0	0	1	0	0	0	0	1	0	1
3	25501660	T	A	00010	00010	59	0	71	1	62	0	48	10	60	0	311	0	0	0	1	0	0	0	0	1	0	0	1
3	26059382	C	T	00011	00011	53	0	55	1	67	0	46	16	32	12	282	0	0	0	1	1	0	0	0	1	1	0	2
3	26516180	G	T	00010	00010	65	0	57	0	62	0	40	8	59	0	291	0	0	0	1	0	0	0	0	1	0	0	1
3	27619529	A	T	00011	00011	45	1	44	0	55	0	37	10	34	9	235	0	0	0	1	1	0	0	0	1	1	0	2
3	27886661	A	T	00010	00010	48	1	80	0	72	0	42	13	52	0	308	0	0	0	1	0	0	0	0	1	0	0	1
3	28710712	G	T	10000	10000	65	10	70	0	67	0	48	0	32	1	293	1	0	0	0	0	1	0	0	0	0	0	1
3	31427111	A	T	00011	00011	66	0	63	0	60	0	30	13	47	12	291	0	0	0	1	1	0	0	0	1	1	0	2
3	35330716	C	T	00011	00011	55	0	66	0	70	0	37	11	49	9	297	0	0	0	1	1	0	0	0	1	1	0	2
3	36379792	G	A	00011	00011	41	0	42	0	51	0	36	13	32	6	221	0	0	0	1	1	0	0	0	1	1	0	2
3	36729928	C	A	00010	00011	55	0	44	1	58	1	32	13	54	2	260	0	0	0	1	0	0	0	0	1	1	1	2
3	42313526	T	G	10100	11100	40	5	45	2	42	4	40	0	36	1	215	1	0	1	0	0	1	1	1	0	0	1	3
3	42313529	G	C	10100	10100	42	5	47	1	42	4	43	0	37	1	222	1	0	1	0	0	1	0	1	0	0	0	2
3	44228626	C	T	01000	01000	40	0	26	7	45	0	38	0	29	0	185	0	1	0	0	0	0	1	0	0	0	0	1
3	49007285	G	A	01000	01000	20	0	29	5	36	0	45	0	24	1	160	0	1	0	0	0	0	1	0	0	0	0	1
3	49856700	A	C	01000	01000	35	0	27	9	48	0	54	0	39	0	212	0	1	0	0	0	0	1	0	0	0	0	1
3	49865562	G	T	01101	01111	25	1	26	3	36	4	39	2	29	5	170	0	1	1	0	1	0	1	1	1	1	1	4
3	49865571	T	C	01101	01111	25	1	22	3	29	4	36	2	29	5	156	0	1	1	0	1	0	1	1	1	1	1	4
3	50007240	C	T	00010	00010	35	0	30	0	30	0	29	5	26	0	155	0	0	0	1	0	0	0	0	1	0	0	1
3	51616115	G	A	01100	11110	45	3	39	5	43	6	52	3	45	1	242	0	1	1	0	0	1	1	1	1	0	2	4
3	51616131	C	T	01100	11110	43	4	40	5	48	6	53	3	45	1	248	0	1	1	0	0	1	1	1	1	0	2	4
3	51616165	C	T	01100	11110	57	3	46	5	47	6	47	3	38	1	253	0	1	1	0	0	1	1	1	1	0	2	4
3	51824882	A	G	00100	00100	45	0	44	0	44	7	59	0	25	1	225	0	0	1	0	0	0	0	1	0	0	0	1
3	52146774	G	A	01000	01000	33	0	42	7	35	1	65	0	37	0	220	0	1	0	0	0	0	1	0	0	0	0	1
3	53868777	T	C	00011	00011	41	0	35	0	55	0	37	15	40	11	234	0	0	0	1	1	0	0	0	1	1	0	2
3	55801999	T	C	10000	11001	40	8	47	3	46	1	34	1	37	2	219	1	0	0	0	0	1	1	0	0	1	2	3
3	55802005	T	C	10000	11001	38	8	49	3	46	1	37	1	40	2	225	1	0	0	0	0	1	1	0	0	1	2	3
3	55987308	C	A	00011	00011	55	0	58	0	58	0	49	15	34	7	276	0	0	0	1	1	0	0	0	1	1	0	2
3	56771172	C	T	00010	00010	42	0	38	0	54	0	33	8	39	0	214	0	0	0	1	0	0	0	0	1	0	0	1
3	56972741	T	C	00010	00010	41	0	38	0	52	0	31	12	37	0	211	0	0	0	1	0	0	0	0	1	0	0	1
3	57217858	G	A	00011	00011	59	1	62	0	58	1	33	7	27	10	258	0	0	0	1	1	0	0	0	1	1	0	2
3	57469978	G	T	01000	01000	70	1	50	15	63	0	51	0	45	0	295	0	1	0	0	0	0	1	0	0	0	0	1
3	57951063	G	T	00011	00011	31	0	27	0	32	1	26	10	30	12	169	0	0	0	1	1	0	0	0	1	1	0	2
3	58232155	C	T	00011	00011	37	0	26	0	35	0	30	6	25	6	165	0	0	0	1	1	0	0	0	1	1	0	2
3	58784892	C	T	00001	00001	59	0	59	0	76	0	52	1	37	7	291	0	0	0	0	1	0	0	0	0	1	0	1
3	58978202	C	A	00011	00011	56	0	41	0	60	0	30	14	42	8	251	0	0	0	1	1	0	0	0	1	1	0	2
3	59098768	G	A	00100	00100	52	0	50	0	56	8	54	0	41	0	261	0	0	1	0	0	0	0	1	0	0	0	1
3	59439739	G	T	00011	00011	48	0	36	0	57	0	36	16	43	5	241	0	0	0	1	1	0	0	0	1	1	0	2
3	59465356	G	A	00011	00011	46	0	49	0	57	0	43	17	43	5	260	0	0	0	1	1	0	0	0	1	1	0	2
3	62387977	A	G	00001	00001	34	0	28	0	29	0	31	0	21	7	150	0	0	0	0	1	0	0	0	0	1	0	1
3	63647858	G	A	00011	00011	37	0	48	0	45	0	31	12	34	13	220	0	0	0	1	1	0	0	0	1	1	0	2
3	64104883	C	T	00010	00010	76	1	70	1	80	0	51	9	68	0	356	0	0	0	1	0	0	0	0	1	0	0	1
3	65161927	T	C	00010	00010	52	0	58	0	56	0	48	8	38	0	260	0	0	0	1	0	0	0	0	1	0	0	1
3	66735586	T	C	01000	01000	64	0	54	12	82	0	51	0	64	0	327	0	1	0	0	0	0	1	0	0	0	0	1
3	71875220	C	T	01000	01000	30	0	31	5	48	0	55	0	24	0	193	0	1	0	0	0	0	1	0	0	0	0	1
3	71913784	C	T	00011	00011	48	0	43	0	68	0	32	16	28	8	243	0	0	0	1	1	0	0	0	1	1	0	2
3	71943645	C	T	00011	00011	32	0	51	0	47	0	41	17	25	11	224	0	0	0	1	1	0	0	0	1	1	0	2
3	73699213	T	C	00011	00011	52	0	61	0	53	0	51	20	25	17	279	0	0	0	1	1	0	0	0	1	1	0	2
3	74833078	C	T	00011	00011	71	0	85	1	80	0	47	25	41	11	361	0	0	0	1	1	0	0	0	1	1	0	2
3	75673241	C	T	00010	00010	27	1	23	0	28	1	26	5	28	0	139	0	0	0	1	0	0	0	0	1	0	0	1
3	75696962	C	T	01000	01111	44	1	66	10	69	5	54	4	54	3	310	0	1	0	0	0	0	1	1	1	1	3	4
3	75790704	C	T	01101	01111	53	1	57	12	62	7	65	3	50	8	318	0	1	1	0	1	0	1	1	1	1	1	4
3	75790717	G	A	01101	01111	49	1	48	10	53	11	59	4	45	7	287	0	1	1	0	1	0	1	1	1	1	1	4
3	75814741	T	A	01111	01111	27	1	33	3	52	7	41	4	31	5	204	0	1	1	1	1	0	1	1	1	1	0	4
3	75820667	G	T	00110	01111	31	1	29	2	41	4	46	7	31	2	194	0	0	1	1	0	0	1	1	1	1	2	4
3	76413926	T	A	10000	10000	67	10	76	0	50	0	48	0	58	0	309	1	0	0	0	0	1	0	0	0	0	0	1
3	76472921	T	C	00011	00011	44	0	68	0	49	0	38	8	34	9	250	0	0	0	1	1	0	0	0	1	1	0	2
3	76516195	A	G	00011	00011	78	0	85	0	82	0	33	11	58	14	361	0	0	0	1	1	0	0	0	1	1	0	2
3	77059614	C	G	00010	00010	50	0	65	0	66	0	40	7	36	0	264	0	0	0	1	0	0	0	0	1	0	0	1
3	77328002	A	T	01000	01000	48	0	57	9	75	0	59	0	53	1	302	0	1	0	0	0	0	1	0	0	0	0	1
3	77892991	G	A	00010	00010	58	0	68	0	54	0	46	10	56	0	292	0	0	0	1	0	0	0	0	1	0	0	1
3	78571830	C	T	00011	00011	51	0	62	0	71	0	37	15	37	16	289	0	0	0	1	1	0	0	0	1	1	0	2
3	80132573	A	T	00011	00011	49	0	61	0	60	0	34	19	50	7	280	0	0	0	1	1	0	0	0	1	1	0	2
3	80552412	G	T	00011	00011	63	1	67	0	67	0	32	17	48	6	301	0	0	0	1	1	0	0	0	1	1	0	2
3	81831702	G	A	00011	10011	37	2	31	0	52	1	30	10	24	6	193	0	0	0	1	1	1	0	0	1	1	1	3
3	81965056	A	G	01000	01000	60	0	51	11	56	1	52	0	49	0	280	0	1	0	0	0	0	1	0	0	0	0	1
3	82653521	C	A	00010	00010	34	1	43	1	35	0	39	10	35	0	198	0	0	0	1	0	0	0	0	1	0	0	1
3	84742194	G	A	00011	00011	43	0	39	0	46	0	27	7	33	8	203	0	0	0	1	1	0	0	0	1	1	0	2
3	85564073	C	T	00011	00011	74	0	57	0	73	0	41	15	43	9	312	0	0	0	1	1	0	0	0	1	1	0	2
3	86776250	A	T	00011	00011	49	1	75	0	64	0	40	18	41	18	306	0	0	0	1	1	0	0	0	1	1	0	2
3	88167916	C	T	00001	00001	56	0	70	0	59	0	53	0	40	16	294	0	0	0	0	1	0	0	0	0	1	0	1
3	89683100	G	T	00001	00001	58	0	84	0	68	0	47	0	51	9	317	0	0	0	0	1	0	0	0	0	1	0	1
3	90084159	C	T	01000	01000	48	0	56	10	56	0	55	0	64	0	289	0	1	0	0	0	0	1	0	0	0	0	1
3	93551965	C	T	00001	00001	35	0	42	0	36	0	76	0	34	6	229	0	0	0	0	1	0	0	0	0	1	0	1
3	95857793	T	A	00001	00001	81	0	49	1	66	1	56	0	57	10	321	0	0	0	0	1	0	0	0	0	1	0	1
3	98635840	G	C	00010	00010	48	0	59	0	80	0	26	8	48	0	269	0	0	0	1	0	0	0	0	1	0	0	1
3	98856168	A	G	00010	00010	56	0	60	0	63	0	39	6	46	0	270	0	0	0	1	0	0	0	0	1	0	0	1
3	99043823	G	C	00011	00011	51	0	57	0	65	0	37	8	40	7	265	0	0	0	1	1	0	0	0	1	1	0	2
3	99044125	G	A	00011	00011	59	0	60	0	51	0	48	10	42	4	274	0	0	0	1	1	0	0	0	1	1	0	2
3	100778227	C	T	00010	00010	71	0	78	0	67	0	63	9	68	0	356	0	0	0	1	0	0	0	0	1	0	0	1
3	101134002	A	G	11000	11011	49	6	55	8	87	1	60	5	55	4	330	1	1	0	0	0	1	1	0	1	1	2	4
3	102968894	G	C	00011	00011	65	0	66	1	84	0	33	24	43	6	322	0	0	0	1	1	0	0	0	1	1	0	2
3	103673144	C	A	00011	00011	72	0	71	0	69	0	54	12	39	7	324	0	0	0	1	1	0	0	0	1	1	0	2
3	105040365	A	G	00011	00011	78	0	83	0	78	0	45	18	41	10	353	0	0	0	1	1	0	0	0	1	1	0	2
3	106600397	T	A	00001	00001	72	1	73	0	93	0	74	1	45	15	374	0	0	0	0	1	0	0	0	0	1	0	1
3	107526359	T	G	00011	00011	48	0	67	0	61	0	39	16	40	10	281	0	0	0	1	1	0	0	0	1	1	0	2
3	107651873	C	T	00011	00011	52	0	56	0	57	0	40	16	30	11	262	0	0	0	1	1	0	0	0	1	1	0	2
3	108166069	T	G	00010	00010	64	0	67	0	58	0	44	11	44	0	288	0	0	0	1	0	0	0	0	1	0	0	1
3	108887641	C	T	00011	00011	40	0	45	0	53	0	41	13	28	3	223	0	0	0	1	1	0	0	0	1	1	0	2
3	108901112	C	A	00011	00011	40	1	44	0	43	0	34	12	27	3	204	0	0	0	1	1	0	0	0	1	1	0	2
3	108983486	A	G	01001	01101	30	0	32	3	29	2	27	1	18	4	146	0	1	0	0	1	0	1	1	0	1	1	3
3	109564353	T	C	00011	00011	53	0	67	0	65	0	47	19	40	11	302	0	0	0	1	1	0	0	0	1	1	0	2
3	109774661	C	A	00010	00010	80	0	88	0	79	0	42	13	55	0	357	0	0	0	1	0	0	0	0	1	0	0	1
3	110178474	C	T	00011	00011	64	0	52	0	81	0	40	17	52	7	313	0	0	0	1	1	0	0	0	1	1	0	2
3	110554144	A	G	00001	00001	62	0	72	1	72	0	48	0	31	6	292	0	0	0	0	1	0	0	0	0	1	0	1
3	110944166	G	T	00011	00011	43	0	52	0	63	0	34	20	29	16	257	0	0	0	1	1	0	0	0	1	1	0	2
3	111003562	A	T	00100	00100	66	0	76	0	51	9	56	0	58	0	316	0	0	1	0	0	0	0	1	0	0	0	1
3	111359001	G	A	00011	00011	44	0	69	0	65	0	38	13	25	9	263	0	0	0	1	1	0	0	0	1	1	0	2
3	112580027	G	A	00011	00011	39	0	54	0	51	0	52	11	20	13	240	0	0	0	1	1	0	0	0	1	1	0	2
3	113799445	C	T	00011	01011	58	0	64	2	63	0	36	24	47	12	306	0	0	0	1	1	0	1	0	1	1	1	3
3	115131105	C	G	00011	00011	36	0	52	0	40	0	39	9	21	16	213	0	0	0	1	1	0	0	0	1	1	0	2
3	116195253	G	T	00001	00001	53	0	65	0	66	0	55	0	33	13	285	0	0	0	0	1	0	0	0	0	1	0	1
3	118134419	C	A	00011	00011	68	1	74	0	70	0	53	15	44	5	330	0	0	0	1	1	0	0	0	1	1	0	2
3	118191103	C	T	00011	00011	36	0	46	1	53	0	27	14	16	7	200	0	0	0	1	1	0	0	0	1	1	0	2
3	118377431	G	T	00010	00010	43	0	68	0	53	0	39	9	42	0	254	0	0	0	1	0	0	0	0	1	0	0	1
3	119210906	A	G	00010	00010	46	1	46	0	52	0	45	7	63	0	260	0	0	0	1	0	0	0	0	1	0	0	1
3	121259339	G	A	00001	00001	69	0	61	0	66	0	50	0	52	9	307	0	0	0	0	1	0	0	0	0	1	0	1
3	123319384	G	A	00011	00011	73	0	57	0	61	0	53	25	53	15	337	0	0	0	1	1	0	0	0	1	1	0	2
3	124079135	G	T	00011	00011	34	0	47	0	41	0	45	20	27	7	221	0	0	0	1	1	0	0	0	1	1	0	2
3	124079136	C	G	00011	00011	35	0	47	0	42	0	45	20	29	6	224	0	0	0	1	1	0	0	0	1	1	0	2
3	124300409	G	T	11100	11101	38	11	33	20	43	16	55	1	52	4	273	1	1	1	0	0	1	1	1	0	1	1	4
3	125537274	G	A	11001	11001	35	5	23	3	30	1	44	1	19	6	167	1	1	0	0	1	1	1	0	0	1	0	3
3	126316275	T	C	01000	01000	65	0	44	11	65	0	50	0	33	0	268	0	1	0	0	0	0	1	0	0	0	0	1
3	128934399	G	A	00011	00011	36	0	45	0	45	0	24	10	34	12	206	0	0	0	1	1	0	0	0	1	1	0	2
3	129404760	T	C	00010	00010	68	0	63	0	80	0	39	8	49	0	307	0	0	0	1	0	0	0	0	1	0	0	1
3	131469290	G	A	00011	00011	85	0	72	1	95	0	36	21	45	19	374	0	0	0	1	1	0	0	0	1	1	0	2
3	132194002	A	T	00011	00011	63	0	70	0	63	0	29	9	37	4	275	0	0	0	1	1	0	0	0	1	1	0	2
3	136206394	A	T	00011	00011	64	0	67	0	62	0	42	6	35	19	295	0	0	0	1	1	0	0	0	1	1	0	2
3	138481992	T	G	01101	01101	25	0	19	4	18	3	28	1	31	4	133	0	1	1	0	1	0	1	1	0	1	0	3
3	141185312	G	T	00011	00011	62	0	78	0	63	1	36	15	32	16	303	0	0	0	1	1	0	0	0	1	1	0	2
3	141415356	C	T	00010	00010	46	0	43	0	36	1	38	7	28	0	199	0	0	0	1	0	0	0	0	1	0	0	1
3	144536577	C	T	00100	00100	64	0	72	0	57	10	54	0	48	0	305	0	0	1	0	0	0	0	1	0	0	0	1
3	145493375	G	A	00011	00011	56	0	57	0	68	0	38	15	43	6	283	0	0	0	1	1	0	0	0	1	1	0	2
3	146869490	C	A	00010	00010	58	0	64	0	65	0	44	10	49	1	291	0	0	0	1	0	0	0	0	1	0	0	1
3	149746457	T	C	00011	10011	45	3	38	0	50	0	37	7	44	9	233	0	0	0	1	1	1	0	0	1	1	1	3
3	150890502	G	T	01000	01000	79	0	57	17	73	0	78	0	60	0	364	0	1	0	0	0	0	1	0	0	0	0	1
3	151828881	C	T	00010	00010	64	0	62	0	70	0	31	9	53	0	289	0	0	0	1	0	0	0	0	1	0	0	1
3	154023948	T	C	01000	01000	79	0	59	11	59	0	43	0	68	0	319	0	1	0	0	0	0	1	0	0	0	0	1
3	154631751	G	A	00010	11010	47	2	34	4	44	0	31	6	28	0	196	0	0	0	1	0	1	1	0	1	0	2	3
3	155685546	C	T	00011	00011	59	0	55	0	64	1	44	13	42	6	284	0	0	0	1	1	0	0	0	1	1	0	2
3	157731306	C	T	00010	00010	46	0	58	0	44	0	41	15	50	0	254	0	0	0	1	0	0	0	0	1	0	0	1
3	158132998	G	T	00011	00011	51	1	67	0	60	0	43	14	36	14	286	0	0	0	1	1	0	0	0	1	1	0	2
3	158953325	G	C	00010	00010	54	1	51	0	63	0	51	10	38	0	268	0	0	0	1	0	0	0	0	1	0	0	1
3	160413446	C	T	01000	01000	56	0	44	12	55	0	59	0	45	0	271	0	1	0	0	0	0	1	0	0	0	0	1
3	161176734	A	T	00011	00011	59	0	56	0	67	0	53	10	42	15	302	0	0	0	1	1	0	0	0	1	1	0	2
3	161833592	G	T	00011	00011	87	0	69	0	80	0	30	13	42	18	339	0	0	0	1	1	0	0	0	1	1	0	2
3	161923151	T	C	00011	00011	57	0	81	1	85	0	49	16	38	8	335	0	0	0	1	1	0	0	0	1	1	0	2
3	162445607	C	A	00011	00011	63	0	68	0	70	0	34	13	71	12	331	0	0	0	1	1	0	0	0	1	1	0	2
3	163261973	C	T	00011	00011	74	0	67	0	61	0	46	21	33	7	309	0	0	0	1	1	0	0	0	1	1	0	2
3	163291957	C	T	00011	00011	49	0	47	0	48	1	51	21	32	14	263	0	0	0	1	1	0	0	0	1	1	0	2
3	163693615	A	C	00001	00001	60	0	78	0	68	0	58	0	55	13	332	0	0	0	0	1	0	0	0	0	1	0	1
3	165897097	C	A	00011	00011	57	0	45	0	61	0	37	11	26	12	249	0	0	0	1	1	0	0	0	1	1	0	2
3	166444393	G	T	00010	00010	66	0	51	0	64	0	34	11	51	0	277	0	0	0	1	0	0	0	0	1	0	0	1
3	168201778	G	A	00001	00011	65	0	84	0	70	1	38	2	38	16	314	0	0	0	0	1	0	0	0	1	1	1	2
3	169574032	T	A	00010	00010	57	0	43	0	36	0	39	8	38	0	221	0	0	0	1	0	0	0	0	1	0	0	1
3	170755065	T	A	00010	00010	51	1	70	0	58	1	46	13	52	0	292	0	0	0	1	0	0	0	0	1	0	0	1
3	172564329	G	T	00011	00011	39	0	35	0	47	0	32	14	31	10	208	0	0	0	1	1	0	0	0	1	1	0	2
3	172942144	A	G	01000	11011	49	3	44	6	48	1	42	2	35	2	232	0	1	0	0	0	1	1	0	1	1	3	4
3	173821190	C	A	11101	11101	62	22	47	39	49	12	36	1	41	6	315	1	1	1	0	1	1	1	1	0	1	0	4
3	174519907	A	C	01000	01000	57	0	52	13	50	0	47	0	41	0	260	0	1	0	0	0	0	1	0	0	0	0	1
3	175147728	G	C	00011	00011	65	0	82	0	65	0	24	14	41	10	301	0	0	0	1	1	0	0	0	1	1	0	2
3	175849917	A	G	00011	00011	66	0	76	0	80	0	39	12	42	12	327	0	0	0	1	1	0	0	0	1	1	0	2
3	176744219	A	G	00011	00011	66	0	78	0	70	0	43	15	49	14	335	0	0	0	1	1	0	0	0	1	1	0	2
3	178448833	A	G	00011	00011	34	0	35	0	38	0	26	9	16	5	163	0	0	0	1	1	0	0	0	1	1	0	2
3	179698284	A	C	00010	00010	61	0	52	1	54	0	55	11	45	0	279	0	0	0	1	0	0	0	0	1	0	0	1
3	180783104	C	T	00010	00010	51	0	60	0	56	0	42	10	57	0	276	0	0	0	1	0	0	0	0	1	0	0	1
3	182505417	G	T	00001	00001	44	0	54	1	64	1	52	0	41	6	263	0	0	0	0	1	0	0	0	0	1	0	1
3	182728895	C	T	00010	00010	24	0	24	0	43	0	39	12	26	0	168	0	0	0	1	0	0	0	0	1	0	0	1
3	183340522	A	G	11110	11110	33	10	39	7	40	8	50	5	28	1	221	1	1	1	1	0	1	1	1	1	0	0	4
3	184775398	G	A	01000	01000	43	0	38	15	50	0	55	0	48	0	249	0	1	0	0	0	0	1	0	0	0	0	1
3	185409939	A	C	00011	00011	42	0	46	0	55	0	37	20	34	6	240	0	0	0	1	1	0	0	0	1	1	0	2
3	189811310	T	C	00011	00011	51	0	70	0	69	0	29	20	40	13	292	0	0	0	1	1	0	0	0	1	1	0	2
3	191608404	C	G	01000	01000	64	0	77	12	80	0	60	0	53	0	346	0	1	0	0	0	0	1	0	0	0	0	1
3	194028953	G	C	10110	10110	19	4	24	1	27	7	24	4	28	1	139	1	0	1	1	0	1	0	1	1	0	0	3
3	194028977	C	G	01111	01111	28	0	19	4	29	5	23	3	23	3	137	0	1	1	1	1	0	1	1	1	1	0	4
3	194174505	T	C	00010	00010	53	0	56	0	68	0	46	8	48	0	279	0	0	0	1	0	0	0	0	1	0	0	1
3	197112816	T	G	00001	11101	51	4	64	3	57	2	56	1	30	8	276	0	0	0	0	1	1	1	1	0	1	3	4
3	197779556	T	C	01000	11101	46	2	39	6	30	2	39	1	41	2	208	0	1	0	0	0	1	1	1	0	1	3	4
4	2121933	C	A	00011	00011	64	0	63	0	58	0	36	13	31	14	279	0	0	0	1	1	0	0	0	1	1	0	2
4	2125249	G	A	00011	00011	29	0	32	0	36	0	31	10	23	8	169	0	0	0	1	1	0	0	0	1	1	0	2
4	2134127	G	C	00011	00011	44	0	52	0	56	0	40	14	38	7	251	0	0	0	1	1	0	0	0	1	1	0	2
4	2135936	G	A	00011	00011	56	0	50	0	61	0	31	17	33	9	257	0	0	0	1	1	0	0	0	1	1	0	2
4	2640166	G	A	00011	01011	34	0	31	2	31	0	31	14	43	7	193	0	0	0	1	1	0	1	0	1	1	1	3
4	3600709	C	T	01101	01111	29	1	28	3	26	3	38	2	40	5	175	0	1	1	0	1	0	1	1	1	1	1	4
4	3617218	G	A	00011	00011	26	0	31	0	28	0	32	7	20	4	148	0	0	0	1	1	0	0	0	1	1	0	2
4	5191594	G	A	00011	00011	42	0	50	0	38	0	41	15	38	18	242	0	0	0	1	1	0	0	0	1	1	0	2
4	5316982	C	A	00001	00001	53	0	57	0	51	0	38	0	35	8	242	0	0	0	0	1	0	0	0	0	1	0	1
4	5589566	C	A	10101	10111	35	8	56	1	43	9	46	2	31	5	236	1	0	1	0	1	1	0	1	1	1	1	4
4	6041146	G	A	00011	00011	25	0	22	0	26	0	33	10	19	6	141	0	0	0	1	1	0	0	0	1	1	0	2
4	7870677	G	A	01010	11010	37	3	27	5	35	0	41	6	38	0	192	0	1	0	1	0	1	1	0	1	0	1	3
4	9896180	C	A	00001	00011	61	0	46	0	50	0	50	3	53	11	274	0	0	0	0	1	0	0	0	1	1	1	2
4	10893931	G	C	00010	00010	63	0	51	0	67	0	39	8	63	0	291	0	0	0	1	0	0	0	0	1	0	0	1
4	10932609	G	C	10110	10110	39	7	51	0	41	6	19	3	43	1	210	1	0	1	1	0	1	0	1	1	0	0	3
4	11187708	C	T	00001	00001	67	0	54	0	64	0	25	0	34	6	250	0	0	0	0	1	0	0	0	0	1	0	1
4	11585015	T	C	11100	11101	24	3	30	3	47	8	59	1	51	2	228	1	1	1	0	0	1	1	1	0	1	1	4
4	11807909	G	C	01000	01000	46	0	35	9	62	0	48	0	44	0	244	0	1	0	0	0	0	1	0	0	0	0	1
4	12563226	T	G	00010	00010	76	0	75	0	69	0	50	12	35	0	317	0	0	0	1	0	0	0	0	1	0	0	1
4	14655157	G	C	00011	00011	64	0	52	0	62	0	31	16	58	19	302	0	0	0	1	1	0	0	0	1	1	0	2
4	14865215	C	T	00011	00011	45	0	55	0	47	0	40	19	47	10	263	0	0	0	1	1	0	0	0	1	1	0	2
4	16600060	G	T	00011	00011	54	0	48	0	46	0	29	15	39	8	239	0	0	0	1	1	0	0	0	1	1	0	2
4	17065457	T	A	00010	00010	64	0	58	0	46	0	36	11	47	0	262	0	0	0	1	0	0	0	0	1	0	0	1
4	17074397	T	A	00011	00011	71	0	59	0	65	0	50	11	37	17	310	0	0	0	1	1	0	0	0	1	1	0	2
4	18882429	C	T	00011	00011	52	1	51	0	50	0	29	17	30	17	247	0	0	0	1	1	0	0	0	1	1	0	2
4	21277216	G	T	00011	00011	36	0	50	0	57	0	34	17	35	13	242	0	0	0	1	1	0	0	0	1	1	0	2
4	22543085	C	A	00100	00100	64	0	54	0	61	9	48	0	46	1	283	0	0	1	0	0	0	0	1	0	0	0	1
4	23433138	T	A	00001	00001	46	0	66	0	63	0	32	0	44	8	259	0	0	0	0	1	0	0	0	0	1	0	1
4	24683729	T	A	00001	00011	47	0	45	0	58	0	50	2	27	8	237	0	0	0	0	1	0	0	0	1	1	1	2
4	25839194	C	T	00011	00011	59	0	60	0	50	0	30	13	38	7	257	0	0	0	1	1	0	0	0	1	1	0	2
4	26739722	A	G	00011	00011	64	0	76	0	63	0	26	11	47	13	300	0	0	0	1	1	0	0	0	1	1	0	2
4	27153431	C	T	00011	00011	61	0	64	0	45	0	32	11	35	16	264	0	0	0	1	1	0	0	0	1	1	0	2
4	28396474	G	A	00011	00011	56	0	61	0	72	0	31	21	35	8	284	0	0	0	1	1	0	0	0	1	1	0	2
4	28541608	T	A	00010	00010	56	0	67	0	58	0	43	9	45	0	278	0	0	0	1	0	0	0	0	1	0	0	1
4	31788197	C	T	01000	01000	35	0	26	8	55	0	35	0	37	0	196	0	1	0	0	0	0	1	0	0	0	0	1
4	32933517	G	C	00100	00100	80	1	62	0	41	7	40	0	58	0	289	0	0	1	0	0	0	0	1	0	0	0	1
4	33227265	T	C	00011	00011	55	0	57	0	57	0	45	24	37	11	286	0	0	0	1	1	0	0	0	1	1	0	2
4	36345534	A	T	01000	01000	54	0	53	10	57	0	58	0	54	0	286	0	1	0	0	0	0	1	0	0	0	0	1
4	36612760	A	G	00011	00011	53	0	56	0	46	0	31	12	32	11	241	0	0	0	1	1	0	0	0	1	1	0	2
4	36676477	C	T	10100	11110	23	5	25	2	36	5	48	4	32	0	180	1	0	1	0	0	1	1	1	1	0	2	4
4	39247667	G	T	00001	00001	55	0	66	0	59	0	60	0	37	16	293	0	0	0	0	1	0	0	0	0	1	0	1
4	39341787	C	A	00001	00001	62	0	61	0	78	0	62	0	35	24	322	0	0	0	0	1	0	0	0	0	1	0	1
4	41572670	A	C	00010	00010	55	0	41	0	59	0	55	10	58	0	278	0	0	0	1	0	0	0	0	1	0	0	1
4	42888074	C	A	00010	00010	69	1	77	0	65	1	48	12	58	0	331	0	0	0	1	0	0	0	0	1	0	0	1
4	43074689	C	T	00100	00100	35	0	52	0	42	6	53	0	38	0	226	0	0	1	0	0	0	0	1	0	0	0	1
4	44048703	C	A	00001	00001	63	0	55	1	61	0	53	0	35	18	286	0	0	0	0	1	0	0	0	0	1	0	1
4	44400020	C	T	00010	00010	67	0	85	0	86	0	47	14	56	1	356	0	0	0	1	0	0	0	0	1	0	0	1
4	44581402	C	T	00011	00011	71	0	73	1	64	0	37	16	39	17	318	0	0	0	1	1	0	0	0	1	1	0	2
4	44876709	G	T	00001	00001	68	1	85	0	90	0	56	1	55	13	369	0	0	0	0	1	0	0	0	0	1	0	1
4	45014512	C	T	01000	01001	67	0	63	9	70	0	63	1	65	2	340	0	1	0	0	0	0	1	0	0	1	1	2
4	45532358	C	T	00001	00001	44	0	44	0	40	0	43	1	28	7	207	0	0	0	0	1	0	0	0	0	1	0	1
4	46004710	G	A	00010	00010	46	0	44	0	57	0	48	12	37	0	244	0	0	0	1	0	0	0	0	1	0	0	1
4	46538559	C	A	00011	00011	44	0	89	0	75	0	36	12	46	12	314	0	0	0	1	1	0	0	0	1	1	0	2
4	52940140	G	A	00011	00011	52	0	40	0	48	1	50	10	33	5	239	0	0	0	1	1	0	0	0	1	1	0	2
4	53655180	G	A	00001	00001	35	0	47	0	45	0	34	0	32	7	200	0	0	0	0	1	0	0	0	0	1	0	1
4	54044071	T	G	00100	00101	33	0	28	1	25	5	46	0	26	2	166	0	0	1	0	0	0	0	1	0	1	1	2
4	54114418	C	T	00011	00011	25	1	40	1	42	1	58	5	28	6	207	0	0	0	1	1	0	0	0	1	1	0	2
4	55497759	G	A	00010	00010	38	0	29	0	39	1	43	6	39	0	195	0	0	0	1	0	0	0	0	1	0	0	1
4	56581481	C	T	00011	00011	48	0	47	0	45	0	38	14	33	12	237	0	0	0	1	1	0	0	0	1	1	0	2
4	56956613	G	T	00010	00010	43	0	32	0	43	1	35	10	48	0	212	0	0	0	1	0	0	0	0	1	0	0	1
4	57606034	A	G	00001	00001	51	0	50	0	51	0	41	0	37	12	242	0	0	0	0	1	0	0	0	0	1	0	1
4	59209832	T	C	00010	00010	52	1	67	0	58	1	42	15	60	0	296	0	0	0	1	0	0	0	0	1	0	0	1
4	60976919	C	A	00011	00011	79	0	63	0	67	0	50	11	38	15	323	0	0	0	1	1	0	0	0	1	1	0	2
4	61534182	T	G	00010	00010	58	0	76	0	68	0	38	8	48	0	296	0	0	0	1	0	0	0	0	1	0	0	1
4	61558079	C	T	00001	00001	88	0	75	0	67	0	55	0	48	7	340	0	0	0	0	1	0	0	0	0	1	0	1
4	62127578	T	G	00001	00001	61	0	67	0	66	0	41	1	49	19	304	0	0	0	0	1	0	0	0	0	1	0	1
4	63005565	G	A	01000	01000	65	0	55	14	65	0	46	0	49	0	294	0	1	0	0	0	0	1	0	0	0	0	1
4	66287923	G	A	00100	00100	58	0	76	0	77	13	38	0	62	0	324	0	0	1	0	0	0	0	1	0	0	0	1
4	66659678	C	G	00100	00100	74	0	65	0	63	11	61	0	60	0	334	0	0	1	0	0	0	0	1	0	0	0	1
4	67019701	C	T	01000	01000	27	0	27	10	58	0	52	0	40	0	214	0	1	0	0	0	0	1	0	0	0	0	1
4	67077281	G	T	00011	00011	80	0	102	0	75	0	43	15	47	15	377	0	0	0	1	1	0	0	0	1	1	0	2
4	67290367	A	G	00010	00010	75	0	90	0	68	0	52	11	74	0	370	0	0	0	1	0	0	0	0	1	0	0	1
4	69338560	C	A	00011	00011	70	0	93	1	74	0	31	20	53	15	357	0	0	0	1	1	0	0	0	1	1	0	2
4	70317919	G	A	00010	11011	85	8	66	4	79	0	35	6	51	3	337	0	0	0	1	0	1	1	0	1	1	3	4
4	72463519	T	C	00001	00001	41	0	41	1	54	0	49	0	34	13	233	0	0	0	0	1	0	0	0	0	1	0	1
4	72706242	A	T	00001	00001	64	0	53	0	69	0	78	0	48	9	321	0	0	0	0	1	0	0	0	0	1	0	1
4	73968229	C	T	00100	00100	60	0	74	0	51	10	47	0	51	0	293	0	0	1	0	0	0	0	1	0	0	0	1
4	73985115	G	A	00011	00011	53	1	64	0	73	0	46	12	38	11	298	0	0	0	1	1	0	0	0	1	1	0	2
4	76419111	G	C	00011	00011	83	1	74	0	79	0	46	14	39	10	346	0	0	0	1	1	0	0	0	1	1	0	2
4	77134141	C	A	00011	00011	27	0	37	0	48	0	31	14	40	14	211	0	0	0	1	1	0	0	0	1	1	0	2
4	78538459	T	G	00011	00011	42	0	56	0	65	0	32	15	41	12	263	0	0	0	1	1	0	0	0	1	1	0	2
4	81370265	G	A	00010	00010	60	0	85	0	71	0	46	8	70	0	340	0	0	0	1	0	0	0	0	1	0	0	1
4	83538488	G	T	00001	00001	21	0	26	0	33	0	37	0	29	6	152	0	0	0	0	1	0	0	0	0	1	0	1
4	86836532	T	G	01000	01000	68	0	51	9	83	0	54	0	58	0	323	0	1	0	0	0	0	1	0	0	0	0	1
4	87496874	A	C	00011	00011	64	0	68	0	84	1	47	15	60	14	353	0	0	0	1	1	0	0	0	1	1	0	2
4	88722645	C	T	10101	11101	26	3	29	5	30	4	30	1	21	8	157	1	0	1	0	1	1	1	1	0	1	1	4
4	89912755	C	A	00011	00011	39	1	48	0	72	1	36	14	40	20	271	0	0	0	1	1	0	0	0	1	1	0	2
4	90786214	G	T	00001	00001	69	0	56	0	70	0	50	0	40	8	293	0	0	0	0	1	0	0	0	0	1	0	1
4	94415337	T	A	01000	01000	54	0	44	16	73	1	72	0	54	0	314	0	1	0	0	0	0	1	0	0	0	0	1
4	97139151	A	T	01000	01000	48	0	45	8	74	0	42	0	53	0	270	0	1	0	0	0	0	1	0	0	0	0	1
4	101845860	G	A	00011	00011	60	0	53	0	76	0	34	16	26	11	276	0	0	0	1	1	0	0	0	1	1	0	2
4	103871084	T	C	10110	11110	55	6	50	4	53	6	48	7	50	1	280	1	0	1	1	0	1	1	1	1	0	1	4
4	104125251	G	A	00011	00011	59	1	63	0	75	0	36	16	47	17	314	0	0	0	1	1	0	0	0	1	1	0	2
4	104371468	A	G	01000	01000	72	0	54	17	54	0	37	0	60	0	294	0	1	0	0	0	0	1	0	0	0	0	1
4	106251027	C	A	10110	11110	56	8	52	3	64	6	45	8	56	0	298	1	0	1	1	0	1	1	1	1	0	1	4
4	107741765	T	C	00010	00010	58	0	80	0	82	0	42	16	70	0	348	0	0	0	1	0	0	0	0	1	0	0	1
4	111401318	G	C	00010	00010	50	0	68	0	58	0	50	10	64	0	300	0	0	0	1	0	0	0	0	1	0	0	1
4	113421197	C	T	00011	00011	45	0	38	0	55	0	55	12	30	20	255	0	0	0	1	1	0	0	0	1	1	0	2
4	114190982	T	A	00011	00011	40	0	43	0	54	0	34	9	39	11	230	0	0	0	1	1	0	0	0	1	1	0	2
4	114339652	G	A	00011	00011	61	1	53	1	45	0	32	10	34	16	253	0	0	0	1	1	0	0	0	1	1	0	2
4	115498447	A	G	00010	00010	68	0	82	1	73	0	52	10	60	0	346	0	0	0	1	0	0	0	0	1	0	0	1
4	115712350	C	G	00011	00011	45	0	58	0	57	0	54	13	37	11	275	0	0	0	1	1	0	0	0	1	1	0	2
4	115898231	C	G	00001	00001	68	1	75	0	75	0	47	0	56	10	332	0	0	0	0	1	0	0	0	0	1	0	1
4	116591945	G	C	00001	00011	68	0	68	0	72	0	34	2	47	9	300	0	0	0	0	1	0	0	0	1	1	1	2
4	117029927	G	A	00100	00100	50	1	61	0	58	7	69	0	59	1	306	0	0	1	0	0	0	0	1	0	0	0	1
4	117593613	C	T	00010	00010	36	0	45	0	49	0	24	18	65	0	237	0	0	0	1	0	0	0	0	1	0	0	1
4	117844204	G	A	00011	00011	68	0	87	0	73	0	46	15	50	13	352	0	0	0	1	1	0	0	0	1	1	0	2
4	118681194	T	C	00011	00011	57	0	43	0	51	0	31	11	53	12	258	0	0	0	1	1	0	0	0	1	1	0	2
4	119218350	G	T	00001	00001	50	0	53	0	47	0	62	1	49	8	270	0	0	0	0	1	0	0	0	0	1	0	1
4	120578165	A	G	01000	01000	64	0	55	12	67	1	54	0	66	0	319	0	1	0	0	0	0	1	0	0	0	0	1
4	123427722	C	A	00011	00011	51	0	36	0	53	1	38	8	29	8	224	0	0	0	1	1	0	0	0	1	1	0	2
4	123628810	A	G	00011	00011	41	0	57	0	55	0	30	19	37	17	256	0	0	0	1	1	0	0	0	1	1	0	2
4	124554858	C	T	00100	00100	61	0	74	0	72	9	54	0	84	0	354	0	0	1	0	0	0	0	1	0	0	0	1
4	125781265	G	T	00011	00011	69	0	72	1	70	0	41	13	62	24	352	0	0	0	1	1	0	0	0	1	1	0	2
4	127472066	C	G	00011	00011	48	0	71	0	63	0	31	17	47	9	286	0	0	0	1	1	0	0	0	1	1	0	2
4	131255375	A	C	00011	00011	50	0	52	0	57	0	38	16	56	11	280	0	0	0	1	1	0	0	0	1	1	0	2
4	132399978	T	C	00011	00011	51	0	68	1	59	0	51	14	44	17	305	0	0	0	1	1	0	0	0	1	1	0	2
4	133885057	G	C	00011	00011	65	0	71	0	75	0	46	9	44	9	319	0	0	0	1	1	0	0	0	1	1	0	2
4	134845422	G	T	00011	00011	67	0	55	0	69	0	46	23	51	8	319	0	0	0	1	1	0	0	0	1	1	0	2
4	135205253	T	C	00011	00011	75	0	83	1	83	0	45	12	47	15	361	0	0	0	1	1	0	0	0	1	1	0	2
4	135451265	C	A	01000	01000	54	0	50	7	74	0	47	0	57	1	290	0	1	0	0	0	0	1	0	0	0	0	1
4	136930805	C	A	01000	01000	54	0	33	10	75	1	51	0	57	0	281	0	1	0	0	0	0	1	0	0	0	0	1
4	137253232	C	A	00011	00011	68	0	77	0	64	0	43	14	47	13	326	0	0	0	1	1	0	0	0	1	1	0	2
4	138110669	C	G	01000	01000	70	0	47	11	59	0	52	0	52	1	292	0	1	0	0	0	0	1	0	0	0	0	1
4	138512407	A	C	01000	01000	64	0	71	13	85	0	59	1	60	0	353	0	1	0	0	0	0	1	0	0	0	0	1
4	140258017	A	T	00011	00011	61	0	67	0	75	0	53	11	44	11	322	0	0	0	1	1	0	0	0	1	1	0	2
4	140468474	G	A	00011	00011	50	0	56	1	63	0	33	20	22	10	255	0	0	0	1	1	0	0	0	1	1	0	2
4	141040703	T	C	00010	00010	36	0	38	0	53	0	30	16	33	0	206	0	0	0	1	0	0	0	0	1	0	0	1
4	141052028	C	A	00010	00010	48	0	49	1	53	0	43	7	55	1	257	0	0	0	1	0	0	0	0	1	0	0	1
4	141772811	A	C	00011	00011	69	0	83	0	67	0	42	10	51	8	330	0	0	0	1	1	0	0	0	1	1	0	2
4	145312269	A	T	00011	00011	66	0	65	0	64	0	38	12	55	12	312	0	0	0	1	1	0	0	0	1	1	0	2
4	146133136	G	T	00011	00011	63	0	43	0	48	0	55	11	41	16	277	0	0	0	1	1	0	0	0	1	1	0	2
4	146878914	C	T	00011	01111	28	1	27	4	36	3	30	6	24	4	163	0	0	0	1	1	0	1	1	1	1	2	4
4	148005025	G	A	01000	01000	54	0	62	11	60	0	41	0	55	0	283	0	1	0	0	0	0	1	0	0	0	0	1
4	148580607	A	T	00011	00011	46	0	49	0	56	0	55	14	48	8	276	0	0	0	1	1	0	0	0	1	1	0	2
4	149160975	C	T	00001	00011	47	0	59	0	57	0	65	2	39	13	282	0	0	0	0	1	0	0	0	1	1	1	2
4	149323779	A	G	00011	00011	53	0	48	0	58	0	35	9	39	15	257	0	0	0	1	1	0	0	0	1	1	0	2
4	151099848	C	T	10000	10000	64	9	68	0	62	0	55	0	52	0	310	1	0	0	0	0	1	0	0	0	0	0	1
4	154057132	G	A	10001	10011	34	7	25	0	36	1	34	2	26	6	171	1	0	0	0	1	1	0	0	1	1	1	3
4	154057142	A	G	10001	10011	40	5	27	0	35	1	35	2	29	4	178	1	0	0	0	1	1	0	0	1	1	1	3
4	154344897	G	A	00100	00100	42	0	41	0	39	14	36	0	30	0	202	0	0	1	0	0	0	0	1	0	0	0	1
4	155325591	G	A	00001	00001	62	0	75	0	84	0	50	1	54	15	341	0	0	0	0	1	0	0	0	0	1	0	1
4	155651130	A	T	00011	00011	63	1	58	0	62	0	41	16	39	21	301	0	0	0	1	1	0	0	0	1	1	0	2
4	158063506	T	A	00011	00011	70	0	74	0	83	0	42	16	47	23	355	0	0	0	1	1	0	0	0	1	1	0	2
4	158938651	G	A	00011	00011	84	1	68	0	70	0	36	18	53	14	344	0	0	0	1	1	0	0	0	1	1	0	2
4	159420010	A	G	00011	00011	70	0	88	1	72	0	42	16	50	8	347	0	0	0	1	1	0	0	0	1	1	0	2
4	163673821	A	C	00011	00011	73	0	95	0	63	0	35	12	55	19	352	0	0	0	1	1	0	0	0	1	1	0	2
4	165087871	C	T	00100	00100	65	0	59	0	49	8	47	0	52	0	280	0	0	1	0	0	0	0	1	0	0	0	1
4	165803108	A	G	00100	00100	55	0	56	0	38	8	37	1	64	0	259	0	0	1	0	0	0	0	1	0	0	0	1
4	165838559	G	A	00011	00011	46	0	37	0	38	0	37	6	35	7	206	0	0	0	1	1	0	0	0	1	1	0	2
4	166092167	G	A	01000	01000	38	0	34	10	58	0	48	0	47	0	235	0	1	0	0	0	0	1	0	0	0	0	1
4	167778167	T	C	01000	01000	49	0	51	14	58	0	46	0	39	0	257	0	1	0	0	0	0	1	0	0	0	0	1
4	167968430	A	G	01000	01000	69	0	59	11	86	0	56	0	58	0	339	0	1	0	0	0	0	1	0	0	0	0	1
4	168326817	G	A	00011	00011	61	0	64	0	98	0	36	17	38	15	329	0	0	0	1	1	0	0	0	1	1	0	2
4	170320939	T	C	00001	00001	34	0	60	0	63	0	48	1	35	10	251	0	0	0	0	1	0	0	0	0	1	0	1
4	170635202	G	A	00100	00100	59	0	68	0	47	19	45	0	65	0	303	0	0	1	0	0	0	0	1	0	0	0	1
4	170993432	G	A	10010	10011	31	11	62	1	61	0	41	11	55	2	275	1	0	0	1	0	1	0	0	1	1	1	3
4	172125700	G	C	00100	00100	61	0	67	0	64	10	46	0	54	0	302	0	0	1	0	0	0	0	1	0	0	0	1
4	172920575	G	T	00001	00011	73	0	49	0	73	0	52	2	50	15	314	0	0	0	0	1	0	0	0	1	1	1	2
4	173184711	G	T	01000	01000	76	0	68	10	61	1	50	0	62	0	328	0	1	0	0	0	0	1	0	0	0	0	1
4	173231930	T	A	00011	00011	62	0	65	0	63	0	32	10	32	12	276	0	0	0	1	1	0	0	0	1	1	0	2
4	173666813	G	A	00011	00011	50	0	48	0	52	0	45	7	36	11	249	0	0	0	1	1	0	0	0	1	1	0	2
4	173669711	G	C	00011	00011	61	0	66	0	65	0	58	15	51	19	335	0	0	0	1	1	0	0	0	1	1	0	2
4	174057193	G	A	00011	00011	74	0	66	0	66	1	46	16	41	15	325	0	0	0	1	1	0	0	0	1	1	0	2
4	176117949	C	T	00011	00011	52	0	62	0	54	0	41	21	36	7	273	0	0	0	1	1	0	0	0	1	1	0	2
4	177182120	C	T	00001	00001	46	1	61	0	60	0	57	0	35	10	270	0	0	0	0	1	0	0	0	0	1	0	1
4	178589603	T	C	00001	00001	65	0	68	0	69	0	31	0	37	9	279	0	0	0	0	1	0	0	0	0	1	0	1
4	178884436	G	T	00011	00011	80	0	85	0	69	0	36	14	63	17	364	0	0	0	1	1	0	0	0	1	1	0	2
4	180578635	G	A	00010	00111	65	0	67	0	81	2	39	8	63	6	331	0	0	0	1	0	0	0	1	1	1	2	3
4	180660276	C	A	00010	00010	61	0	61	0	54	0	37	14	54	0	281	0	0	0	1	0	0	0	0	1	0	0	1
4	181598360	A	T	00011	00011	55	0	61	0	71	0	38	24	56	13	318	0	0	0	1	1	0	0	0	1	1	0	2
4	181782567	A	G	00011	00011	51	0	54	0	61	0	48	17	42	8	281	0	0	0	1	1	0	0	0	1	1	0	2
4	182011863	C	A	00011	00011	40	1	50	0	39	0	40	16	36	10	232	0	0	0	1	1	0	0	0	1	1	0	2
4	182019897	G	A	00011	00011	66	0	71	0	58	0	38	16	34	11	294	0	0	0	1	1	0	0	0	1	1	0	2
4	182328236	G	A	00011	00011	56	0	42	0	57	0	29	20	36	11	251	0	0	0	1	1	0	0	0	1	1	0	2
4	184461245	A	G	10000	11110	35	7	40	2	41	4	36	2	35	1	203	1	0	0	0	0	1	1	1	1	0	3	4
4	184976387	G	C	00100	00100	48	0	53	0	42	6	46	0	53	0	248	0	0	1	0	0	0	0	1	0	0	0	1
4	185121811	G	A	00011	00011	28	0	28	0	32	0	30	11	31	12	172	0	0	0	1	1	0	0	0	1	1	0	2
4	189243943	C	T	00001	00001	42	0	44	0	46	0	65	0	43	7	247	0	0	0	0	1	0	0	0	0	1	0	1
4	190301045	A	T	10101	10111	17	3	23	1	24	4	43	3	18	3	139	1	0	1	0	1	1	0	1	1	1	1	4
4	190918642	C	A	00100	11110	38	3	47	2	50	9	42	2	36	0	229	0	0	1	0	0	1	1	1	1	0	3	4
4	190923365	A	G	00001	11101	51	2	53	3	56	3	49	0	37	7	261	0	0	0	0	1	1	1	1	0	1	3	4
4	190932980	T	C	10010	11011	31	5	59	2	42	1	56	7	51	3	257	1	0	0	1	0	1	1	0	1	1	2	4
5	3737041	C	T	00011	00011	52	0	56	0	43	0	40	15	34	13	253	0	0	0	1	1	0	0	0	1	1	0	2
5	4546511	T	G	00011	00011	39	0	52	0	47	0	40	22	28	10	238	0	0	0	1	1	0	0	0	1	1	0	2
5	5296508	C	G	00011	00011	37	1	29	0	49	0	30	15	28	12	201	0	0	0	1	1	0	0	0	1	1	0	2
5	5667850	C	T	00001	00001	26	0	34	0	42	0	48	0	29	11	190	0	0	0	0	1	0	0	0	0	1	0	1
5	7078711	T	C	00001	00011	57	0	52	0	58	0	58	3	39	8	275	0	0	0	0	1	0	0	0	1	1	1	2
5	7803553	C	T	01000	01000	29	0	22	7	35	0	37	0	43	0	173	0	1	0	0	0	0	1	0	0	0	0	1
5	8057858	G	A	00001	00011	38	0	37	0	50	0	59	2	27	7	220	0	0	0	0	1	0	0	0	1	1	1	2
5	9408132	C	T	00010	10011	48	3	51	1	63	0	38	7	45	6	262	0	0	0	1	0	1	0	0	1	1	2	3
5	10414091	T	C	00001	00001	68	0	56	0	58	1	44	0	46	9	282	0	0	0	0	1	0	0	0	0	1	0	1
5	11709378	T	A	00011	01011	52	0	54	2	56	0	42	25	32	14	277	0	0	0	1	1	0	1	0	1	1	1	3
5	11783602	C	A	00011	00011	36	0	51	0	48	0	34	14	44	14	241	0	0	0	1	1	0	0	0	1	1	0	2
5	11880306	T	G	00011	00011	55	0	60	0	80	0	38	22	38	15	308	0	0	0	1	1	0	0	0	1	1	0	2
5	12652646	C	A	00011	00011	58	0	45	0	47	0	33	13	41	11	248	0	0	0	1	1	0	0	0	1	1	0	2
5	16028733	G	A	00001	00001	57	0	53	1	64	0	64	0	49	9	297	0	0	0	0	1	0	0	0	0	1	0	1
5	19890258	C	T	00011	00011	52	0	63	0	65	0	36	18	42	15	291	0	0	0	1	1	0	0	0	1	1	0	2
5	21617509	C	T	00011	00011	48	0	57	0	67	0	49	15	39	11	286	0	0	0	1	1	0	0	0	1	1	0	2
5	21755910	G	A	00011	00011	59	0	73	0	65	0	40	13	36	13	299	0	0	0	1	1	0	0	0	1	1	0	2
5	25034594	A	T	00011	00011	66	0	81	0	57	0	36	12	51	11	314	0	0	0	1	1	0	0	0	1	1	0	2
5	25034595	T	G	00011	00011	64	0	80	0	57	0	36	12	48	11	308	0	0	0	1	1	0	0	0	1	1	0	2
5	28589712	A	G	00011	00011	57	0	68	0	66	0	39	15	33	14	292	0	0	0	1	1	0	0	0	1	1	0	2
5	28850075	C	T	00010	00010	42	1	49	0	49	0	54	11	48	1	255	0	0	0	1	0	0	0	0	1	0	0	1
5	29000670	C	A	00011	00011	80	0	76	0	60	0	35	10	33	14	308	0	0	0	1	1	0	0	0	1	1	0	2
5	30152901	A	T	00011	00011	65	0	65	0	64	0	38	17	47	15	311	0	0	0	1	1	0	0	0	1	1	0	2
5	30682302	G	A	00011	00011	52	0	65	0	67	0	34	12	37	20	287	0	0	0	1	1	0	0	0	1	1	0	2
5	30757734	G	T	00011	00011	55	0	67	0	60	0	43	15	43	15	298	0	0	0	1	1	0	0	0	1	1	0	2
5	30842809	G	C	00011	00011	64	0	83	0	59	0	27	14	37	15	299	0	0	0	1	1	0	0	0	1	1	0	2
5	30904761	G	A	00011	00011	61	0	59	0	68	1	47	18	31	7	292	0	0	0	1	1	0	0	0	1	1	0	2
5	31163202	G	A	00011	00011	52	0	56	1	60	0	45	13	45	7	279	0	0	0	1	1	0	0	0	1	1	0	2
5	31454814	G	A	00011	00011	46	0	48	1	69	0	31	13	39	16	263	0	0	0	1	1	0	0	0	1	1	0	2
5	35305178	C	A	10000	10000	46	7	47	1	44	0	45	0	57	0	247	1	0	0	0	0	1	0	0	0	0	0	1
5	36055075	C	T	01000	01000	46	0	39	11	47	0	58	0	38	0	239	0	1	0	0	0	0	1	0	0	0	0	1
5	39254032	C	T	00011	00011	63	0	71	0	62	0	38	13	56	16	319	0	0	0	1	1	0	0	0	1	1	0	2
5	40609813	C	A	00011	00011	53	0	53	0	59	0	45	9	41	9	269	0	0	0	1	1	0	0	0	1	1	0	2
5	42023869	C	A	00011	00011	58	0	90	0	70	0	47	18	56	20	359	0	0	0	1	1	0	0	0	1	1	0	2
5	46124070	A	T	00011	00011	77	0	83	0	82	0	35	15	40	16	348	0	0	0	1	1	0	0	0	1	1	0	2
5	50659510	G	A	00010	00010	41	0	51	0	46	0	51	10	51	0	250	0	0	0	1	0	0	0	0	1	0	0	1
5	52014233	C	A	00001	00001	67	0	64	0	56	0	69	1	48	11	316	0	0	0	0	1	0	0	0	0	1	0	1
5	53173981	T	A	00011	00011	48	0	56	0	66	0	30	18	32	14	264	0	0	0	1	1	0	0	0	1	1	0	2
5	53733698	G	A	01000	01000	56	0	35	6	47	0	42	0	39	0	225	0	1	0	0	0	0	1	0	0	0	0	1
5	60397242	G	A	00011	00011	82	0	81	0	81	0	40	12	50	15	361	0	0	0	1	1	0	0	0	1	1	0	2
5	61431053	C	T	00100	01100	39	0	48	2	49	7	49	0	39	0	233	0	0	1	0	0	0	1	1	0	0	1	2
5	61479256	C	G	00011	00011	50	0	46	0	54	0	30	15	42	8	245	0	0	0	1	1	0	0	0	1	1	0	2
5	62151477	C	G	01000	01000	59	0	70	10	68	0	66	0	63	0	336	0	1	0	0	0	0	1	0	0	0	0	1
5	64618042	C	T	11101	11101	56	7	65	7	58	9	60	0	61	11	334	1	1	1	0	1	1	1	1	0	1	0	4
5	64618052	A	G	11101	11101	56	7	62	8	50	9	65	0	57	10	324	1	1	1	0	1	1	1	1	0	1	0	4
5	64789320	A	C	00010	00010	69	0	61	0	55	0	30	9	33	0	257	0	0	0	1	0	0	0	0	1	0	0	1
5	66373129	C	G	00011	00011	44	1	44	0	59	0	24	15	30	14	231	0	0	0	1	1	0	0	0	1	1	0	2
5	66966230	C	A	00011	00011	57	0	57	0	67	0	44	15	43	12	295	0	0	0	1	1	0	0	0	1	1	0	2
5	67241424	A	G	00001	00001	50	0	56	0	66	0	49	1	35	8	265	0	0	0	0	1	0	0	0	0	1	0	1
5	68549570	G	A	00011	00011	57	0	57	0	41	0	27	21	39	15	257	0	0	0	1	1	0	0	0	1	1	0	2
5	74082131	C	T	00011	00011	40	0	46	0	38	0	32	11	29	10	206	0	0	0	1	1	0	0	0	1	1	0	2
5	74854409	A	G	01000	01000	66	0	65	14	75	0	52	0	63	0	335	0	1	0	0	0	0	1	0	0	0	0	1
5	76192117	G	A	00011	00011	55	0	52	0	57	1	41	9	37	10	262	0	0	0	1	1	0	0	0	1	1	0	2
5	76465256	G	A	00010	00010	33	1	37	0	50	0	53	12	51	0	237	0	0	0	1	0	0	0	0	1	0	0	1
5	78950240	G	A	00010	00010	58	1	56	0	51	0	47	9	43	0	265	0	0	0	1	0	0	0	0	1	0	0	1
5	79047975	C	G	00100	00100	38	0	53	0	43	8	45	0	35	0	222	0	0	1	0	0	0	0	1	0	0	0	1
5	79443945	G	C	00011	00011	31	0	43	0	49	0	32	8	36	8	207	0	0	0	1	1	0	0	0	1	1	0	2
5	81043539	T	A	00011	00011	57	0	62	0	77	0	30	13	42	14	295	0	0	0	1	1	0	0	0	1	1	0	2
5	81338526	T	G	10001	11001	39	5	65	4	63	1	58	1	36	7	279	1	0	0	0	1	1	1	0	0	1	1	3
5	81338555	C	A	00001	11001	45	4	58	2	59	0	56	1	33	5	263	0	0	0	0	1	1	1	0	0	1	2	3
5	81338573	G	T	10001	11001	41	4	58	2	51	0	49	1	29	5	240	1	0	0	0	1	1	1	0	0	1	1	3
5	81747112	G	T	00011	00011	42	0	34	1	50	1	40	11	47	13	239	0	0	0	1	1	0	0	0	1	1	0	2
5	84035424	A	T	00001	00001	82	0	91	0	86	1	62	0	54	7	383	0	0	0	0	1	0	0	0	0	1	0	1
5	86831428	C	T	01011	01011	31	0	21	9	27	1	17	9	31	4	150	0	1	0	1	1	0	1	0	1	1	0	3
5	89472190	A	G	00100	00100	57	0	69	0	65	8	54	0	72	0	325	0	0	1	0	0	0	0	1	0	0	0	1
5	90146073	A	G	00010	00010	61	0	58	0	46	0	47	8	55	0	275	0	0	0	1	0	0	0	0	1	0	0	1
5	91158617	C	T	00010	00010	43	0	71	0	63	0	59	12	59	0	307	0	0	0	1	0	0	0	0	1	0	0	1
5	91834472	T	C	00100	00100	69	0	63	0	86	11	57	0	54	0	340	0	0	1	0	0	0	0	1	0	0	0	1
5	93543467	T	G	01000	01000	63	0	59	14	66	0	54	0	51	0	307	0	1	0	0	0	0	1	0	0	0	0	1
5	94481797	T	C	00011	00011	59	0	75	0	64	0	34	22	48	13	315	0	0	0	1	1	0	0	0	1	1	0	2
5	95237723	C	A	00001	00001	57	0	72	0	78	1	63	1	40	18	330	0	0	0	0	1	0	0	0	0	1	0	1
5	96514129	T	C	01111	01111	66	0	58	6	79	11	52	7	55	5	339	0	1	1	1	1	0	1	1	1	1	0	4
5	99365218	C	T	00011	00011	76	0	75	0	70	0	48	22	49	12	352	0	0	0	1	1	0	0	0	1	1	0	2
5	100134469	T	G	00100	00100	57	0	58	0	38	9	62	0	43	0	267	0	0	1	0	0	0	0	1	0	0	0	1
5	100176105	G	A	00010	00010	61	0	78	0	68	0	52	9	81	0	349	0	0	0	1	0	0	0	0	1	0	0	1
5	103093084	T	C	00011	00011	43	0	48	0	68	0	34	19	37	14	263	0	0	0	1	1	0	0	0	1	1	0	2
5	105265178	A	G	01000	01000	75	0	60	13	72	0	60	0	70	0	350	0	1	0	0	0	0	1	0	0	0	0	1
5	105735810	A	C	01000	01000	71	0	83	11	87	0	43	0	75	0	370	0	1	0	0	0	0	1	0	0	0	0	1
5	107155437	A	C	00011	00011	37	0	40	0	56	0	43	15	29	15	235	0	0	0	1	1	0	0	0	1	1	0	2
5	107933753	C	T	00011	00011	64	0	53	0	57	0	41	20	35	8	278	0	0	0	1	1	0	0	0	1	1	0	2
5	109037225	A	G	00011	00011	44	0	63	1	72	1	42	16	38	14	291	0	0	0	1	1	0	0	0	1	1	0	2
5	109533781	A	G	01000	01000	65	0	55	9	60	0	40	0	72	0	301	0	1	0	0	0	0	1	0	0	0	0	1
5	112624937	A	G	00100	00100	45	0	48	1	52	10	61	0	44	1	262	0	0	1	0	0	0	0	1	0	0	0	1
5	113879780	C	T	01000	01111	51	1	55	7	58	3	53	4	46	2	280	0	1	0	0	0	0	1	1	1	1	3	4
5	113879781	A	G	01000	01111	51	1	53	7	58	3	54	4	47	3	281	0	1	0	0	0	0	1	1	1	1	3	4
5	115282300	G	A	01000	01000	51	0	48	9	49	0	55	0	48	0	260	0	1	0	0	0	0	1	0	0	0	0	1
5	115671320	T	C	01000	01000	59	0	38	15	64	1	53	0	54	0	284	0	1	0	0	0	0	1	0	0	0	0	1
5	117270297	T	A	00010	00010	53	0	66	0	69	0	35	6	66	0	295	0	0	0	1	0	0	0	0	1	0	0	1
5	117270299	T	A	00010	00010	52	0	61	0	70	0	36	6	65	0	290	0	0	0	1	0	0	0	0	1	0	0	1
5	119445512	G	A	01000	01000	57	0	50	11	59	0	51	0	55	0	283	0	1	0	0	0	0	1	0	0	0	0	1
5	120785183	G	A	01000	01100	51	0	68	12	72	2	66	0	49	0	320	0	1	0	0	0	0	1	1	0	0	1	2
5	121014845	T	A	00011	00011	72	0	54	0	67	0	34	10	35	13	285	0	0	0	1	1	0	0	0	1	1	0	2
5	124748027	G	A	00011	00011	58	0	52	1	86	0	41	17	31	23	309	0	0	0	1	1	0	0	0	1	1	0	2
5	124968990	T	C	00011	00011	69	0	64	0	60	0	38	14	35	17	297	0	0	0	1	1	0	0	0	1	1	0	2
5	127122275	A	T	00011	00011	66	0	52	0	57	0	38	23	39	8	283	0	0	0	1	1	0	0	0	1	1	0	2
5	128132466	C	A	00010	00010	49	0	61	0	66	0	53	19	39	0	287	0	0	0	1	0	0	0	0	1	0	0	1
5	128157065	C	A	00010	00010	62	0	72	0	70	0	46	12	55	0	317	0	0	0	1	0	0	0	0	1	0	0	1
5	129257585	A	G	01000	01000	54	0	50	11	66	0	59	0	54	0	294	0	1	0	0	0	0	1	0	0	0	0	1
5	130791077	A	G	00011	00011	55	1	53	0	55	1	39	15	29	20	268	0	0	0	1	1	0	0	0	1	1	0	2
5	130971307	T	C	01000	01000	42	0	32	12	47	1	62	0	60	1	257	0	1	0	0	0	0	1	0	0	0	0	1
5	131474124	G	C	00011	00011	56	0	65	1	74	1	34	25	58	7	321	0	0	0	1	1	0	0	0	1	1	0	2
5	131768517	C	G	01000	01000	65	0	46	10	56	0	57	0	64	0	298	0	1	0	0	0	0	1	0	0	0	0	1
5	132538079	C	A	00011	00011	31	1	24	0	42	0	26	12	19	7	162	0	0	0	1	1	0	0	0	1	1	0	2
5	133176497	A	C	00010	00010	32	0	32	0	30	0	37	7	37	0	175	0	0	0	1	0	0	0	0	1	0	0	1
5	133211369	G	C	00010	00010	33	0	36	0	42	0	44	7	38	0	200	0	0	0	1	0	0	0	0	1	0	0	1
5	136586209	G	A	00010	00010	43	0	47	0	51	0	43	13	40	0	237	0	0	0	1	0	0	0	0	1	0	0	1
5	141064245	C	T	00010	00010	37	0	34	0	30	0	30	6	37	0	174	0	0	0	1	0	0	0	0	1	0	0	1
5	144061510	T	G	00011	00011	53	1	58	1	54	0	40	15	47	14	283	0	0	0	1	1	0	0	0	1	1	0	2
5	145025546	C	T	00011	00011	40	0	77	0	44	0	36	21	40	9	267	0	0	0	1	1	0	0	0	1	1	0	2
5	147660590	C	A	10001	11011	36	4	39	2	41	1	47	4	40	5	219	1	0	0	0	1	1	1	0	1	1	2	4
5	148978021	T	C	11010	11011	22	6	30	6	29	1	31	6	25	4	160	1	1	0	1	0	1	1	0	1	1	1	4
5	149533105	C	G	00011	00011	30	0	41	0	33	0	27	13	22	6	172	0	0	0	1	1	0	0	0	1	1	0	2
5	150792258	G	A	00010	00010	37	0	47	0	61	0	37	9	49	0	240	0	0	0	1	0	0	0	0	1	0	0	1
5	152941279	G	A	00010	00010	55	0	67	0	53	0	36	8	58	0	277	0	0	0	1	0	0	0	0	1	0	0	1
5	156053325	C	T	00001	00001	40	0	45	0	55	1	56	0	42	14	253	0	0	0	0	1	0	0	0	0	1	0	1
5	156626242	C	T	00001	00001	49	0	46	0	70	0	46	1	32	8	252	0	0	0	0	1	0	0	0	0	1	0	1
5	157065329	G	T	01000	01000	32	0	33	9	48	0	36	0	27	0	185	0	1	0	0	0	0	1	0	0	0	0	1
5	160003421	G	A	00010	00010	60	0	51	0	50	0	48	10	32	0	251	0	0	0	1	0	0	0	0	1	0	0	1
5	160866385	C	T	00100	00100	77	0	77	0	67	8	69	0	66	0	364	0	0	1	0	0	0	0	1	0	0	0	1
5	160935814	A	T	00001	00001	65	0	72	0	61	0	59	1	44	17	319	0	0	0	0	1	0	0	0	0	1	0	1
5	161472665	A	C	00011	00011	49	1	63	0	55	0	39	11	36	17	271	0	0	0	1	1	0	0	0	1	1	0	2
5	163169943	C	T	00011	00011	44	0	54	0	61	0	46	7	37	17	266	0	0	0	1	1	0	0	0	1	1	0	2
5	164205920	G	A	01000	01000	56	0	43	9	57	0	60	0	50	1	276	0	1	0	0	0	0	1	0	0	0	0	1
5	165035365	T	A	00011	00011	62	1	55	0	55	0	41	9	46	15	284	0	0	0	1	1	0	0	0	1	1	0	2
5	165391269	C	T	00011	00011	48	0	49	0	41	0	39	12	43	10	242	0	0	0	1	1	0	0	0	1	1	0	2
5	166104325	C	T	00001	00001	46	0	56	1	56	0	58	0	46	8	271	0	0	0	0	1	0	0	0	0	1	0	1
5	166262830	G	A	00001	00011	43	0	51	0	65	0	61	3	43	16	282	0	0	0	0	1	0	0	0	1	1	1	2
5	166412818	G	A	00011	00011	45	0	59	1	65	0	34	14	34	8	260	0	0	0	1	1	0	0	0	1	1	0	2
5	167181297	T	A	00011	00011	67	0	65	0	52	0	37	12	31	16	280	0	0	0	1	1	0	0	0	1	1	0	2
5	168909428	C	G	01000	01000	56	0	43	10	61	0	54	0	43	0	267	0	1	0	0	0	0	1	0	0	0	0	1
5	170034418	G	T	00001	00001	32	0	43	0	30	0	34	0	36	6	181	0	0	0	0	1	0	0	0	0	1	0	1
5	171228265	T	A	00010	00011	38	0	51	0	42	0	33	11	42	3	220	0	0	0	1	0	0	0	0	1	1	1	2
5	172761377	G	A	00010	00011	50	0	63	0	71	0	51	7	67	3	312	0	0	0	1	0	0	0	0	1	1	1	2
5	173018507	G	A	00011	00011	38	0	44	0	44	0	28	19	24	7	204	0	0	0	1	1	0	0	0	1	1	0	2
5	173537656	G	T	01000	01000	41	0	32	6	51	0	54	0	37	1	222	0	1	0	0	0	0	1	0	0	0	0	1
5	175886914	G	A	01000	01000	35	0	33	7	53	0	60	0	63	0	251	0	1	0	0	0	0	1	0	0	0	0	1
5	177123373	G	A	11110	11110	26	8	17	5	21	4	40	5	28	1	155	1	1	1	1	0	1	1	1	1	0	0	4
5	177536286	T	A	00001	00001	28	0	21	0	31	0	29	1	18	17	145	0	0	0	0	1	0	0	0	0	1	0	1
5	178601614	C	T	00011	00011	53	1	38	1	46	0	35	15	25	11	225	0	0	0	1	1	0	0	0	1	1	0	2
5	178789682	C	T	00011	00011	22	0	24	0	41	0	27	9	16	7	146	0	0	0	1	1	0	0	0	1	1	0	2
5	178811796	C	T	00001	00001	27	0	24	0	24	0	27	1	22	13	138	0	0	0	0	1	0	0	0	0	1	0	1
5	178939336	A	G	00101	00101	33	0	31	1	24	3	45	1	24	5	167	0	0	1	0	1	0	0	1	0	1	0	2
5	178939341	T	C	00101	00101	34	0	32	1	20	3	45	1	23	5	164	0	0	1	0	1	0	0	1	0	1	0	2
5	178939376	G	C	00101	00101	43	0	25	1	22	3	45	1	28	6	174	0	0	1	0	1	0	0	1	0	1	0	2
5	179766277	G	A	00010	00010	30	0	29	0	25	0	29	7	27	0	147	0	0	0	1	0	0	0	0	1	0	0	1
6	635644	C	G	01000	01000	51	0	58	15	70	0	65	0	102	0	361	0	1	0	0	0	0	1	0	0	0	0	1
6	1546522	A	T	10011	11011	31	8	42	3	50	1	37	4	32	5	213	1	0	0	1	1	1	1	0	1	1	1	4
6	2427741	C	T	00001	00001	31	0	36	0	28	0	54	1	30	9	189	0	0	0	0	1	0	0	0	0	1	0	1
6	5244705	C	A	00001	00001	52	0	34	0	39	0	51	0	30	10	216	0	0	0	0	1	0	0	0	0	1	0	1
6	5907539	C	T	00011	00011	55	0	57	0	79	0	48	17	49	10	315	0	0	0	1	1	0	0	0	1	1	0	2
6	7292875	T	C	01000	01000	52	0	51	8	61	0	56	0	59	0	287	0	1	0	0	0	0	1	0	0	0	0	1
6	9100796	C	T	10000	10100	22	7	30	1	33	2	36	0	24	0	155	1	0	0	0	0	1	0	1	0	0	1	2
6	9100800	C	G	10000	10100	23	7	26	1	34	2	33	1	24	0	151	1	0	0	0	0	1	0	1	0	0	1	2
6	11634578	C	A	00011	00011	42	1	35	0	29	0	38	14	26	12	197	0	0	0	1	1	0	0	0	1	1	0	2
6	11795409	G	A	00010	00010	72	0	67	0	68	0	58	8	73	0	346	0	0	0	1	0	0	0	0	1	0	0	1
6	13529707	C	T	00010	00010	38	0	41	0	40	0	43	9	42	0	213	0	0	0	1	0	0	0	0	1	0	0	1
6	14992337	G	C	00011	00011	54	0	57	0	55	0	38	15	38	15	272	0	0	0	1	1	0	0	0	1	1	0	2
6	15472064	A	G	00011	00011	44	0	39	0	28	0	26	11	22	9	179	0	0	0	1	1	0	0	0	1	1	0	2
6	17608519	T	C	10000	10111	52	9	74	1	67	5	50	4	55	4	321	1	0	0	0	0	1	0	1	1	1	3	4
6	17608679	C	T	10101	10111	55	7	65	1	68	6	40	3	49	4	298	1	0	1	0	1	1	0	1	1	1	1	4
6	20312526	C	T	00010	00010	52	0	50	0	56	0	35	10	45	0	248	0	0	0	1	0	0	0	0	1	0	0	1
6	20532700	C	T	01000	01000	66	0	42	12	56	0	57	0	52	1	286	0	1	0	0	0	0	1	0	0	0	0	1
6	20664385	T	C	01000	01000	59	0	64	20	81	0	57	0	61	0	342	0	1	0	0	0	0	1	0	0	0	0	1
6	22417972	C	T	00001	00001	65	1	70	0	74	0	52	0	45	15	322	0	0	0	0	1	0	0	0	0	1	0	1
6	22692576	G	A	01000	01000	39	0	41	16	67	1	57	0	47	0	268	0	1	0	0	0	0	1	0	0	0	0	1
6	24260588	C	T	01001	11001	68	2	35	12	53	1	51	1	42	4	269	0	1	0	0	1	1	1	0	0	1	1	3
6	24503652	C	T	00011	00011	37	0	40	1	34	0	23	7	26	7	175	0	0	0	1	1	0	0	0	1	1	0	2
6	24565308	T	C	00010	00010	44	0	39	0	39	1	39	6	43	0	211	0	0	0	1	0	0	0	0	1	0	0	1
6	27274348	G	A	01000	01000	56	0	54	10	54	0	45	0	43	0	262	0	1	0	0	0	0	1	0	0	0	0	1
6	27471712	C	T	00011	00011	66	0	49	0	62	0	26	17	39	19	278	0	0	0	1	1	0	0	0	1	1	0	2
6	27620381	G	T	00010	00010	39	0	37	0	50	0	52	9	50	0	237	0	0	0	1	0	0	0	0	1	0	0	1
6	28949509	G	A	00011	00011	63	0	62	0	66	0	54	17	59	16	337	0	0	0	1	1	0	0	0	1	1	0	2
6	29150011	G	A	00001	00001	58	0	44	0	65	0	50	0	23	8	248	0	0	0	0	1	0	0	0	0	1	0	1
6	30086976	T	C	01000	01000	68	0	38	8	58	0	56	0	53	0	281	0	1	0	0	0	0	1	0	0	0	0	1
6	30834260	G	A	10000	10000	69	8	44	0	46	0	41	0	44	1	253	1	0	0	0	0	1	0	0	0	0	0	1
6	30991280	C	T	00011	00011	48	0	44	0	45	0	31	16	47	10	241	0	0	0	1	1	0	0	0	1	1	0	2
6	32518006	A	G	01111	01111	35	1	31	4	36	6	21	4	27	3	168	0	1	1	1	1	0	1	1	1	1	0	4
6	32728444	T	C	01100	01111	50	1	60	9	52	6	44	2	51	4	279	0	1	1	0	0	0	1	1	1	1	2	4
6	35812682	G	A	00011	00011	48	0	44	0	72	0	41	15	43	13	276	0	0	0	1	1	0	0	0	1	1	0	2
6	39592601	C	T	00011	00011	56	1	68	0	73	0	30	16	36	15	295	0	0	0	1	1	0	0	0	1	1	0	2
6	41275929	G	C	00010	00010	50	0	55	1	45	0	33	13	54	0	251	0	0	0	1	0	0	0	0	1	0	0	1
6	42770169	G	T	00011	01011	47	0	57	2	51	0	35	13	32	8	245	0	0	0	1	1	0	1	0	1	1	1	3
6	44528168	A	G	00011	00011	39	0	33	0	33	0	31	15	19	9	179	0	0	0	1	1	0	0	0	1	1	0	2
6	44971173	A	C	00011	00011	50	0	62	0	70	0	45	16	41	6	290	0	0	0	1	1	0	0	0	1	1	0	2
6	48409278	G	T	00011	00011	67	0	74	0	63	0	36	16	52	24	332	0	0	0	1	1	0	0	0	1	1	0	2
6	48854789	C	T	00011	00011	58	0	61	0	66	0	34	14	41	11	285	0	0	0	1	1	0	0	0	1	1	0	2
6	49953954	C	T	01000	01000	70	0	56	16	91	0	65	0	73	0	371	0	1	0	0	0	0	1	0	0	0	0	1
6	50241224	G	T	01000	01000	51	0	51	11	66	0	52	0	62	0	293	0	1	0	0	0	0	1	0	0	0	0	1
6	50452342	G	A	00011	00011	57	0	64	0	51	1	53	11	38	11	286	0	0	0	1	1	0	0	0	1	1	0	2
6	51417674	T	C	00011	00011	52	0	66	0	78	0	41	15	43	15	310	0	0	0	1	1	0	0	0	1	1	0	2
6	54175510	C	T	01011	01111	38	1	38	7	34	4	28	5	18	3	176	0	1	0	1	1	0	1	1	1	1	1	4
6	54194942	C	T	00001	00001	55	0	66	0	70	0	58	1	42	13	305	0	0	0	0	1	0	0	0	0	1	0	1
6	56582722	A	T	00010	00011	40	0	54	0	50	1	49	15	48	2	259	0	0	0	1	0	0	0	0	1	1	1	2
6	62354126	A	G	00100	00100	89	0	87	0	67	9	46	0	70	0	368	0	0	1	0	0	0	0	1	0	0	0	1
6	63065768	T	A	01000	01000	82	0	48	13	57	0	48	0	55	0	303	0	1	0	0	0	0	1	0	0	0	0	1
6	64595320	T	A	00011	00011	42	0	53	0	64	1	23	10	38	25	256	0	0	0	1	1	0	0	0	1	1	0	2
6	65082406	G	A	00010	00010	42	0	49	0	58	0	47	14	39	0	249	0	0	0	1	0	0	0	0	1	0	0	1
6	65461343	G	T	01000	01000	46	0	37	9	42	1	54	0	38	0	227	0	1	0	0	0	0	1	0	0	0	0	1
6	67794694	A	G	00001	01001	28	0	33	3	20	0	25	0	16	5	130	0	0	0	0	1	0	1	0	0	1	1	2
6	68598592	G	A	00010	00010	29	0	25	0	35	0	28	7	32	1	157	0	0	0	1	0	0	0	0	1	0	0	1
6	70400497	C	A	00011	00011	72	0	80	0	65	0	29	9	59	14	328	0	0	0	1	1	0	0	0	1	1	0	2
6	75351588	C	T	00011	00011	62	0	69	1	53	0	44	19	49	15	312	0	0	0	1	1	0	0	0	1	1	0	2
6	77864112	G	T	00011	00011	54	0	67	0	82	0	54	26	49	16	348	0	0	0	1	1	0	0	0	1	1	0	2
6	78862566	T	C	00100	00100	61	0	57	0	51	9	64	0	44	0	286	0	0	1	0	0	0	0	1	0	0	0	1
6	79114741	C	A	00010	00011	59	0	91	0	78	1	53	18	66	2	368	0	0	0	1	0	0	0	0	1	1	1	2
6	81015026	A	T	00010	00010	73	0	79	0	67	0	26	9	71	1	326	0	0	0	1	0	0	0	0	1	0	0	1
6	81515554	G	T	00011	00011	79	0	83	0	80	0	37	17	46	13	355	0	0	0	1	1	0	0	0	1	1	0	2
6	82532561	T	C	00011	00011	57	0	65	0	48	0	23	10	37	10	250	0	0	0	1	1	0	0	0	1	1	0	2
6	83581094	A	T	00011	00011	58	0	56	0	67	0	35	16	29	12	273	0	0	0	1	1	0	0	0	1	1	0	2
6	84053349	G	A	00010	00010	57	0	58	1	83	0	42	6	66	0	313	0	0	0	1	0	0	0	0	1	0	0	1
6	84344121	C	T	00011	00011	41	0	48	0	56	0	34	19	23	8	229	0	0	0	1	1	0	0	0	1	1	0	2
6	85047045	A	T	00010	00010	67	0	73	0	74	0	33	17	61	0	325	0	0	0	1	0	0	0	0	1	0	0	1
6	85552839	T	C	00100	00100	64	0	60	0	54	7	58	0	55	0	298	0	0	1	0	0	0	0	1	0	0	0	1
6	85818348	G	A	00100	00100	51	1	45	0	45	19	53	0	51	0	265	0	0	1	0	0	0	0	1	0	0	0	1
6	86102411	G	T	01000	01100	49	0	44	8	48	2	56	1	41	0	249	0	1	0	0	0	0	1	1	0	0	1	2
6	86119581	G	A	00001	00001	48	0	51	0	54	0	55	0	39	17	264	0	0	0	0	1	0	0	0	0	1	0	1
6	87253470	C	T	00011	00011	48	0	76	0	65	0	32	18	38	17	294	0	0	0	1	1	0	0	0	1	1	0	2
6	88215736	T	C	00010	00010	60	1	88	0	79	0	32	13	78	0	351	0	0	0	1	0	0	0	0	1	0	0	1
6	88215778	A	C	00010	00010	67	0	80	0	86	0	36	13	68	0	350	0	0	0	1	0	0	0	0	1	0	0	1
6	91175893	G	T	00011	00011	40	0	52	0	55	0	40	9	22	16	234	0	0	0	1	1	0	0	0	1	1	0	2
6	91497420	G	A	00011	00011	47	0	54	0	47	0	35	13	30	13	239	0	0	0	1	1	0	0	0	1	1	0	2
6	91498488	T	C	00010	00010	51	0	39	0	49	1	31	13	44	0	228	0	0	0	1	0	0	0	0	1	0	0	1
6	91774890	C	T	00011	00011	63	0	61	0	59	0	42	18	46	18	307	0	0	0	1	1	0	0	0	1	1	0	2
6	93636657	T	C	00010	00010	72	0	67	0	65	0	37	6	58	0	305	0	0	0	1	0	0	0	0	1	0	0	1
6	94717893	G	A	00010	00010	67	1	65	1	52	0	48	13	49	0	296	0	0	0	1	0	0	0	0	1	0	0	1
6	95262162	A	T	00010	00010	46	0	68	0	59	0	50	7	55	0	285	0	0	0	1	0	0	0	0	1	0	0	1
6	95914212	T	C	00011	00011	50	0	91	0	62	0	42	18	59	13	335	0	0	0	1	1	0	0	0	1	1	0	2
6	98871450	T	A	01000	01000	51	0	43	7	55	0	43	0	48	0	247	0	1	0	0	0	0	1	0	0	0	0	1
6	99310105	A	T	00011	00011	48	0	49	0	49	1	21	15	34	11	228	0	0	0	1	1	0	0	0	1	1	0	2
6	100066885	C	A	00011	00011	25	0	25	0	24	0	32	5	18	10	139	0	0	0	1	1	0	0	0	1	1	0	2
6	102026569	G	T	00010	00010	59	0	60	1	54	0	53	11	46	0	284	0	0	0	1	0	0	0	0	1	0	0	1
6	102403032	T	G	00011	00011	63	0	67	0	67	0	44	20	42	22	325	0	0	0	1	1	0	0	0	1	1	0	2
6	104524908	A	G	00011	00011	69	0	75	0	80	0	53	16	48	9	350	0	0	0	1	1	0	0	0	1	1	0	2
6	106545037	C	A	00011	00011	73	0	68	0	57	0	46	10	52	13	319	0	0	0	1	1	0	0	0	1	1	0	2
6	111364434	C	T	01000	01000	37	0	33	7	31	0	31	0	29	0	168	0	1	0	0	0	0	1	0	0	0	0	1
6	112419955	T	C	00010	00010	62	0	82	0	69	0	49	9	59	0	330	0	0	0	1	0	0	0	0	1	0	0	1
6	112738746	C	T	00011	00011	71	0	79	0	80	0	33	12	44	17	336	0	0	0	1	1	0	0	0	1	1	0	2
6	113863966	C	A	00011	00011	54	1	63	0	77	0	44	16	57	12	324	0	0	0	1	1	0	0	0	1	1	0	2
6	114330218	A	C	00011	00011	86	0	73	0	55	0	36	16	57	20	343	0	0	0	1	1	0	0	0	1	1	0	2
6	116575327	G	C	00011	00011	55	1	48	0	52	0	44	15	48	15	278	0	0	0	1	1	0	0	0	1	1	0	2
6	117372854	T	A	00001	00001	51	0	50	0	46	0	50	0	54	14	265	0	0	0	0	1	0	0	0	0	1	0	1
6	117828068	T	A	00011	00011	43	0	56	0	69	0	36	15	48	8	275	0	0	0	1	1	0	0	0	1	1	0	2
6	119010822	T	A	00001	00001	56	0	59	0	53	1	52	0	37	16	274	0	0	0	0	1	0	0	0	0	1	0	1
6	119500157	A	C	01000	01000	82	0	68	16	87	0	70	0	83	0	406	0	1	0	0	0	0	1	0	0	0	0	1
6	120064265	G	A	00100	10100	48	3	57	0	46	7	30	0	44	0	235	0	0	1	0	0	1	0	1	0	0	1	2
6	120086027	G	A	01000	01000	49	0	42	8	55	1	49	0	57	0	261	0	1	0	0	0	0	1	0	0	0	0	1
6	123898231	G	A	01000	01000	56	0	53	10	67	0	57	0	59	0	302	0	1	0	0	0	0	1	0	0	0	0	1
6	127246950	G	A	00001	00001	53	0	65	0	63	0	62	0	51	9	303	0	0	0	0	1	0	0	0	0	1	0	1
6	127958007	C	T	00011	00011	52	0	58	0	76	1	43	18	32	15	295	0	0	0	1	1	0	0	0	1	1	0	2
6	128711769	G	A	00011	00011	62	0	66	0	85	0	34	23	63	19	352	0	0	0	1	1	0	0	0	1	1	0	2
6	132643998	G	A	00010	00010	48	0	57	0	57	0	50	9	57	0	278	0	0	0	1	0	0	0	0	1	0	0	1
6	132993528	T	C	01000	01000	41	0	37	7	63	0	45	0	42	0	235	0	1	0	0	0	0	1	0	0	0	0	1
6	136584679	T	C	00011	00011	69	0	74	0	65	0	39	16	47	24	334	0	0	0	1	1	0	0	0	1	1	0	2
6	139433918	T	C	00011	00011	60	0	59	0	64	0	41	15	60	13	312	0	0	0	1	1	0	0	0	1	1	0	2
6	139826240	T	G	00011	00011	55	0	58	0	57	0	31	12	38	12	263	0	0	0	1	1	0	0	0	1	1	0	2
6	140595473	G	C	00001	00001	79	0	93	0	79	0	50	0	66	14	381	0	0	0	0	1	0	0	0	0	1	0	1
6	142772512	G	A	00010	00010	60	0	48	0	54	0	51	9	48	0	270	0	0	0	1	0	0	0	0	1	0	0	1
6	143429951	G	T	00010	00010	67	0	56	1	53	0	37	19	82	0	315	0	0	0	1	0	0	0	0	1	0	0	1
6	144020460	C	T	00011	00011	45	0	65	0	50	0	47	18	49	13	287	0	0	0	1	1	0	0	0	1	1	0	2
6	144020813	C	A	00011	00011	60	1	49	0	44	0	43	10	33	8	248	0	0	0	1	1	0	0	0	1	1	0	2
6	144021780	C	T	00011	00011	49	0	42	0	56	0	38	20	33	12	250	0	0	0	1	1	0	0	0	1	1	0	2
6	144023873	G	A	00011	00011	50	0	54	0	55	0	34	16	28	8	245	0	0	0	1	1	0	0	0	1	1	0	2
6	144024025	G	C	00011	00011	58	0	72	0	57	0	38	24	38	8	295	0	0	0	1	1	0	0	0	1	1	0	2
6	144028917	G	A	00011	00011	57	0	59	0	58	0	37	8	45	15	279	0	0	0	1	1	0	0	0	1	1	0	2
6	144062334	G	C	01000	01000	41	0	37	7	62	0	49	0	47	0	243	0	1	0	0	0	0	1	0	0	0	0	1
6	144062335	G	C	01000	01000	41	0	37	7	62	0	48	0	49	0	244	0	1	0	0	0	0	1	0	0	0	0	1
6	144062359	C	T	01000	01000	33	0	24	6	48	0	33	0	41	1	186	0	1	0	0	0	0	1	0	0	0	0	1
6	144552088	G	C	00011	00011	40	0	59	0	61	0	42	12	38	12	264	0	0	0	1	1	0	0	0	1	1	0	2
6	145481831	T	G	00010	00010	58	0	67	0	78	0	54	16	56	0	329	0	0	0	1	0	0	0	0	1	0	0	1
6	146309370	G	A	00001	00001	58	0	79	0	69	1	42	0	49	9	307	0	0	0	0	1	0	0	0	0	1	0	1
6	147036863	G	T	00011	00011	67	0	43	0	48	1	42	12	24	14	251	0	0	0	1	1	0	0	0	1	1	0	2
6	148507221	G	A	00011	00011	49	0	48	0	49	0	32	7	34	14	233	0	0	0	1	1	0	0	0	1	1	0	2
6	149449270	G	A	00001	00001	70	0	59	0	47	0	62	1	55	16	310	0	0	0	0	1	0	0	0	0	1	0	1
6	150395587	T	A	10100	11101	32	9	41	3	44	5	45	1	24	2	206	1	0	1	0	0	1	1	1	0	1	2	4
6	150395601	A	G	10100	11101	33	9	38	2	50	5	42	1	29	2	211	1	0	1	0	0	1	1	1	0	1	2	4
6	151360781	G	A	11100	11110	44	5	44	5	50	5	52	2	54	1	262	1	1	1	0	0	1	1	1	1	0	1	4
6	152511875	C	T	00011	00011	51	0	81	0	74	0	36	15	59	14	330	0	0	0	1	1	0	0	0	1	1	0	2
6	152592031	C	A	01000	01000	50	0	45	12	44	0	42	0	67	0	260	0	1	0	0	0	0	1	0	0	0	0	1
6	153642737	C	T	00001	00001	61	0	61	0	72	0	46	0	57	7	304	0	0	0	0	1	0	0	0	0	1	0	1
6	158763462	C	T	00011	00011	55	1	62	0	53	0	42	13	42	18	286	0	0	0	1	1	0	0	0	1	1	0	2
6	159282167	A	C	01000	01000	44	0	27	8	50	1	56	0	64	0	250	0	1	0	0	0	0	1	0	0	0	0	1
6	160056601	A	G	00011	00011	50	0	55	0	54	0	38	9	43	14	263	0	0	0	1	1	0	0	0	1	1	0	2
6	162013627	A	C	00010	00010	37	0	47	0	50	0	39	16	59	0	248	0	0	0	1	0	0	0	0	1	0	0	1
6	162169760	G	A	00100	00100	54	0	56	0	40	11	41	0	47	0	249	0	0	1	0	0	0	0	1	0	0	0	1
6	162183931	T	C	00010	00010	46	0	59	0	51	0	47	10	43	0	256	0	0	0	1	0	0	0	0	1	0	0	1
6	162514837	G	C	00001	00011	23	0	49	0	42	0	49	2	32	11	208	0	0	0	0	1	0	0	0	1	1	1	2
6	163355360	G	A	01000	01000	58	0	56	12	70	0	45	1	56	0	298	0	1	0	0	0	0	1	0	0	0	0	1
6	164504181	A	G	10000	10000	23	7	26	0	26	0	29	0	30	0	141	1	0	0	0	0	1	0	0	0	0	0	1
6	165263963	T	C	01000	01000	81	0	70	16	75	0	52	0	57	0	351	0	1	0	0	0	0	1	0	0	0	0	1
6	165721328	C	A	00011	00011	31	0	40	0	33	0	28	17	19	4	172	0	0	0	1	1	0	0	0	1	1	0	2
6	165749309	G	A	00010	00010	41	0	29	0	44	1	50	7	40	0	212	0	0	0	1	0	0	0	0	1	0	0	1
6	165818518	G	C	01000	01000	51	0	54	13	69	1	52	1	59	1	301	0	1	0	0	0	0	1	0	0	0	0	1
6	165874374	A	G	01000	01111	41	1	47	10	46	2	58	4	56	2	267	0	1	0	0	0	0	1	1	1	1	3	4
6	165961679	A	G	00100	00100	62	0	56	0	56	9	56	0	64	0	303	0	0	1	0	0	0	0	1	0	0	0	1
6	166768310	T	C	00011	00011	48	0	62	0	53	0	39	19	28	14	263	0	0	0	1	1	0	0	0	1	1	0	2
6	168285793	T	C	00101	11101	58	3	57	4	57	13	39	1	51	6	289	0	0	1	0	1	1	1	1	0	1	2	4
7	1559095	G	A	00110	01111	46	1	57	2	46	12	55	6	51	3	279	0	0	1	1	0	0	1	1	1	1	2	4
7	1617371	T	C	00111	10111	32	2	23	1	28	4	26	8	34	8	166	0	0	1	1	1	1	0	1	1	1	1	4
7	2399320	G	A	00001	00001	32	0	35	0	40	0	45	0	27	8	187	0	0	0	0	1	0	0	0	0	1	0	1
7	2898426	A	C	00011	00011	34	0	39	0	49	0	31	9	27	16	205	0	0	0	1	1	0	0	0	1	1	0	2
7	4486782	C	A	00001	00001	33	0	28	0	42	0	39	0	25	10	177	0	0	0	0	1	0	0	0	0	1	0	1
7	5376332	T	C	00001	01011	26	0	31	3	30	1	46	2	38	8	185	0	0	0	0	1	0	1	0	1	1	2	3
7	5376339	T	C	00001	01011	28	0	31	3	32	1	47	2	44	9	197	0	0	0	0	1	0	1	0	1	1	2	3
7	6690012	T	C	00011	00011	22	0	29	0	24	0	30	9	28	14	156	0	0	0	1	1	0	0	0	1	1	0	2
7	8363979	T	A	10000	10000	39	7	52	0	56	0	54	0	44	1	253	1	0	0	0	0	1	0	0	0	0	0	1
7	10215684	C	A	00011	00011	78	0	83	1	67	0	53	27	48	21	378	0	0	0	1	1	0	0	0	1	1	0	2
7	10523042	A	T	01000	11100	52	2	41	8	55	4	45	1	51	0	259	0	1	0	0	0	1	1	1	0	0	2	3
7	12474318	T	C	00011	00011	63	0	72	0	73	0	33	9	48	10	308	0	0	0	1	1	0	0	0	1	1	0	2
7	13001395	C	G	00100	00100	96	0	76	0	68	8	61	0	64	0	373	0	0	1	0	0	0	0	1	0	0	0	1
7	15126395	G	T	00010	00010	74	0	64	0	77	0	58	8	76	0	357	0	0	0	1	0	0	0	0	1	0	0	1
7	15150482	G	A	00100	00100	61	1	63	0	70	14	62	0	57	0	328	0	0	1	0	0	0	0	1	0	0	0	1
7	16560721	T	G	00010	00010	43	0	35	0	45	0	33	6	26	1	189	0	0	0	1	0	0	0	0	1	0	0	1
7	17683680	G	T	01000	01000	41	0	45	10	59	0	47	0	45	0	247	0	1	0	0	0	0	1	0	0	0	0	1
7	18853409	A	T	00011	00011	63	0	73	0	87	0	59	13	66	14	375	0	0	0	1	1	0	0	0	1	1	0	2
7	19332935	A	G	00001	00011	43	0	57	0	61	0	54	2	38	11	266	0	0	0	0	1	0	0	0	1	1	1	2
7	19656790	G	A	00001	00001	41	0	44	0	55	0	44	0	26	6	216	0	0	0	0	1	0	0	0	0	1	0	1
7	21384425	A	G	01000	01000	24	0	26	11	29	0	42	0	35	0	167	0	1	0	0	0	0	1	0	0	0	0	1
7	21864011	A	G	00010	00010	50	0	61	0	48	0	40	7	49	0	255	0	0	0	1	0	0	0	0	1	0	0	1
7	22885229	C	A	00011	00011	41	0	47	0	58	1	44	17	33	11	252	0	0	0	1	1	0	0	0	1	1	0	2
7	22899159	A	G	00100	00100	56	0	52	0	66	9	50	0	69	0	302	0	0	1	0	0	0	0	1	0	0	0	1
7	23398068	G	A	00011	00011	37	1	50	0	55	0	51	5	38	9	246	0	0	0	1	1	0	0	0	1	1	0	2
7	23583138	G	T	00010	00010	46	0	29	0	57	0	53	8	46	0	239	0	0	0	1	0	0	0	0	1	0	0	1
7	24459131	T	C	00100	00100	61	0	50	0	52	8	58	0	57	0	286	0	0	1	0	0	0	0	1	0	0	0	1
7	24610214	G	A	00010	00010	51	0	55	0	73	0	29	7	45	0	260	0	0	0	1	0	0	0	0	1	0	0	1
7	26342385	C	T	00011	00011	22	0	32	0	43	0	41	15	42	12	207	0	0	0	1	1	0	0	0	1	1	0	2
7	26838716	A	G	01010	01010	22	0	24	3	26	1	22	6	21	0	125	0	1	0	1	0	0	1	0	1	0	0	2
7	27763985	T	A	00001	00001	35	1	43	0	63	0	41	1	33	11	228	0	0	0	0	1	0	0	0	0	1	0	1
7	27863186	C	G	00011	00011	86	0	55	0	77	0	36	8	32	11	305	0	0	0	1	1	0	0	0	1	1	0	2
7	31250002	C	T	00010	00010	51	0	48	0	66	0	41	9	58	0	273	0	0	0	1	0	0	0	0	1	0	0	1
7	31718000	G	A	00001	00001	85	0	66	0	64	1	47	0	50	11	324	0	0	0	0	1	0	0	0	0	1	0	1
7	31800190	C	T	01000	11100	50	4	64	17	56	3	45	1	46	0	286	0	1	0	0	0	1	1	1	0	0	2	3
7	33542913	A	G	00010	00010	56	0	56	0	56	0	33	17	48	0	266	0	0	0	1	0	0	0	0	1	0	0	1
7	34921692	T	A	00010	01111	23	1	28	2	35	3	29	7	18	3	149	0	0	0	1	0	0	1	1	1	1	3	4
7	35310972	C	T	00001	00001	62	0	48	0	54	0	41	1	31	20	257	0	0	0	0	1	0	0	0	0	1	0	1
7	35964488	C	G	00101	01111	24	0	23	4	16	4	40	2	27	6	146	0	0	1	0	1	0	1	1	1	1	2	4
7	35964490	C	T	01101	01111	25	0	24	3	18	3	39	2	28	4	146	0	1	1	0	1	0	1	1	1	1	1	4
7	37160941	G	A	00011	00011	27	0	48	0	54	0	30	27	31	13	230	0	0	0	1	1	0	0	0	1	1	0	2
7	38412120	C	T	00011	00011	52	0	46	0	56	1	45	15	29	14	258	0	0	0	1	1	0	0	0	1	1	0	2
7	39230988	G	A	01000	01000	66	1	60	11	75	0	65	0	66	1	345	0	1	0	0	0	0	1	0	0	0	0	1
7	40891084	C	T	00011	00011	38	0	61	0	63	0	29	13	37	13	254	0	0	0	1	1	0	0	0	1	1	0	2
7	41440017	C	G	00010	00010	52	0	44	0	53	0	44	8	41	0	242	0	0	0	1	0	0	0	0	1	0	0	1
7	42727561	T	C	00011	00011	57	0	54	0	44	0	47	13	22	14	251	0	0	0	1	1	0	0	0	1	1	0	2
7	42735382	C	T	10000	10000	42	8	34	0	47	0	55	0	56	0	242	1	0	0	0	0	1	0	0	0	0	0	1
7	45261146	G	T	00011	00011	34	0	34	0	27	0	20	3	28	11	157	0	0	0	1	1	0	0	0	1	1	0	2
7	46268536	G	A	00100	00100	54	0	59	0	53	7	50	0	54	0	277	0	0	1	0	0	0	0	1	0	0	0	1
7	49468096	G	T	00011	00011	69	0	58	0	86	0	38	26	52	10	339	0	0	0	1	1	0	0	0	1	1	0	2
7	50552882	G	A	01000	01000	78	1	65	15	76	0	55	0	70	0	360	0	1	0	0	0	0	1	0	0	0	0	1
7	51124240	C	T	01000	01000	34	0	31	7	34	0	34	0	35	0	175	0	1	0	0	0	0	1	0	0	0	0	1
7	53963003	C	G	00011	00011	66	0	44	0	54	0	27	11	55	12	269	0	0	0	1	1	0	0	0	1	1	0	2
7	54665106	A	G	00010	00010	62	0	68	1	57	0	47	14	66	0	315	0	0	0	1	0	0	0	0	1	0	0	1
7	55083535	A	G	00001	00001	58	0	49	0	73	0	56	0	42	14	292	0	0	0	0	1	0	0	0	0	1	0	1
7	55931754	T	C	00010	00010	55	0	51	0	50	0	52	12	45	0	265	0	0	0	1	0	0	0	0	1	0	0	1
7	57284355	T	G	10110	10110	16	6	26	1	21	3	38	8	24	0	143	1	0	1	1	0	1	0	1	1	0	0	3
7	57284363	C	T	10110	10110	16	6	27	1	22	3	37	8	24	0	144	1	0	1	1	0	1	0	1	1	0	0	3
7	57653783	T	C	10110	11110	31	6	41	2	50	7	58	8	42	1	246	1	0	1	1	0	1	1	1	1	0	1	4
7	57706616	T	C	10110	10110	21	3	23	0	19	2	37	5	32	1	143	1	0	1	1	0	1	0	1	1	0	0	3
7	57966970	C	G	11100	11101	38	8	48	7	44	6	35	1	29	2	218	1	1	1	0	0	1	1	1	0	1	1	4
7	57968911	A	C	00101	10101	31	3	56	1	40	5	40	1	33	6	216	0	0	1	0	1	1	0	1	0	1	1	3
7	61793993	T	A	01010	11011	48	3	66	12	63	1	58	7	83	5	346	0	1	0	1	0	1	1	0	1	1	2	4
7	62183372	C	T	00011	00011	70	0	81	0	68	0	37	16	39	16	327	0	0	0	1	1	0	0	0	1	1	0	2
7	62663217	C	T	00011	00011	48	0	57	1	60	0	41	23	45	7	282	0	0	0	1	1	0	0	0	1	1	0	2
7	63732104	G	C	00010	00110	37	1	25	0	46	2	45	6	22	0	184	0	0	0	1	0	0	0	1	1	0	1	2
7	63879892	A	T	11000	11001	40	8	38	7	30	1	27	0	28	2	181	1	1	0	0	0	1	1	0	0	1	1	3
7	64232950	C	T	00010	00011	44	0	45	0	49	0	39	12	27	3	219	0	0	0	1	0	0	0	0	1	1	1	2
7	64552748	G	C	10111	10111	18	5	22	1	21	7	29	8	23	7	141	1	0	1	1	1	1	0	1	1	1	0	4
7	65259649	C	T	00100	01111	53	1	42	3	45	9	48	3	39	3	246	0	0	1	0	0	0	1	1	1	1	3	4
7	65259653	T	C	00100	01111	52	1	43	3	45	9	51	3	42	3	252	0	0	1	0	0	0	1	1	1	1	3	4
7	68146090	G	A	10100	10110	33	6	37	1	33	6	43	3	33	1	196	1	0	1	0	0	1	0	1	1	0	1	3
7	68146104	G	A	10100	10110	36	5	39	1	36	6	48	3	34	1	209	1	0	1	0	0	1	0	1	1	0	1	3
7	70551903	C	T	00011	00011	33	0	35	0	28	0	20	14	17	6	153	0	0	0	1	1	0	0	0	1	1	0	2
7	71304692	C	A	00011	00011	32	0	26	0	25	0	21	18	23	7	152	0	0	0	1	1	0	0	0	1	1	0	2
7	71854076	G	A	00010	00010	37	0	38	0	39	0	36	7	34	0	191	0	0	0	1	0	0	0	0	1	0	0	1
7	73464758	T	C	11001	11011	26	3	21	3	42	1	25	2	23	2	148	1	1	0	0	1	1	1	0	1	1	1	4
7	75678097	T	G	01000	01000	29	0	34	7	31	0	33	0	38	0	172	0	1	0	0	0	0	1	0	0	0	0	1
7	76626897	C	G	11110	11110	17	7	23	3	17	6	15	10	24	1	123	1	1	1	1	0	1	1	1	1	0	0	4
7	78395847	A	T	00011	00011	56	0	52	0	83	0	44	14	41	8	298	0	0	0	1	1	0	0	0	1	1	0	2
7	78676437	A	G	00011	00011	63	0	77	0	69	0	44	12	38	12	315	0	0	0	1	1	0	0	0	1	1	0	2
7	82250983	C	T	00011	00011	59	0	45	0	55	0	45	11	47	14	276	0	0	0	1	1	0	0	0	1	1	0	2
7	83690401	G	A	00011	00011	69	0	82	0	66	1	39	22	31	18	328	0	0	0	1	1	0	0	0	1	1	0	2
7	84607969	C	T	00010	00010	60	1	87	0	69	1	58	10	72	0	358	0	0	0	1	0	0	0	0	1	0	0	1
7	88245828	T	C	00010	00010	50	1	57	0	62	0	50	7	60	0	287	0	0	0	1	0	0	0	0	1	0	0	1
7	88991288	C	T	00011	00011	35	0	57	0	71	1	38	10	38	10	260	0	0	0	1	1	0	0	0	1	1	0	2
7	92351442	C	A	00011	00011	68	0	58	0	57	0	23	15	36	10	267	0	0	0	1	1	0	0	0	1	1	0	2
7	93014029	T	G	00011	00011	79	0	65	0	82	0	43	16	51	16	352	0	0	0	1	1	0	0	0	1	1	0	2
7	93099040	T	G	00011	00011	71	0	87	0	74	0	45	17	49	18	361	0	0	0	1	1	0	0	0	1	1	0	2
7	93195850	G	A	00011	00011	59	0	63	0	74	0	31	14	51	11	303	0	0	0	1	1	0	0	0	1	1	0	2
7	95592883	C	T	00011	00011	41	0	61	0	58	0	43	11	53	7	274	0	0	0	1	1	0	0	0	1	1	0	2
7	96990592	A	C	00011	00011	55	0	64	0	49	0	29	9	49	8	263	0	0	0	1	1	0	0	0	1	1	0	2
7	100909041	C	T	00110	10110	36	3	34	1	33	5	35	8	31	1	187	0	0	1	1	0	1	0	1	1	0	1	3
7	103648466	C	T	00010	00010	54	0	64	0	58	0	29	16	58	0	279	0	0	0	1	0	0	0	0	1	0	0	1
7	104022797	G	T	00011	00011	36	0	45	0	58	0	41	16	26	7	229	0	0	0	1	1	0	0	0	1	1	0	2
7	106505546	T	G	00011	00011	71	0	60	1	67	0	33	13	44	10	299	0	0	0	1	1	0	0	0	1	1	0	2
7	106894886	A	G	01000	01000	62	0	63	12	78	0	59	0	62	0	336	0	1	0	0	0	0	1	0	0	0	0	1
7	111066028	A	G	00001	00001	71	1	73	0	77	0	63	1	45	18	349	0	0	0	0	1	0	0	0	0	1	0	1
7	111770765	G	A	01000	01000	56	0	54	13	81	0	77	0	66	0	347	0	1	0	0	0	0	1	0	0	0	0	1
7	113630328	A	G	01000	01000	60	0	43	12	52	0	53	0	38	0	258	0	1	0	0	0	0	1	0	0	0	0	1
7	114110067	G	A	00011	00011	73	0	67	0	53	0	33	12	46	11	295	0	0	0	1	1	0	0	0	1	1	0	2
7	114680926	G	A	00011	00011	61	0	59	0	68	1	29	12	40	11	281	0	0	0	1	1	0	0	0	1	1	0	2
7	115045026	C	T	00010	00010	36	0	54	0	58	1	27	6	36	0	218	0	0	0	1	0	0	0	0	1	0	0	1
7	115058235	T	C	01000	01000	85	0	73	13	67	0	59	1	48	0	346	0	1	0	0	0	0	1	0	0	0	0	1
7	115230600	T	C	11011	11011	48	7	42	5	37	1	31	3	29	4	207	1	1	0	1	1	1	1	0	1	1	0	4
7	116612688	A	C	00011	00011	42	0	46	1	40	0	36	15	32	13	225	0	0	0	1	1	0	0	0	1	1	0	2
7	116815215	A	G	01000	01000	70	0	69	16	84	0	56	1	56	0	352	0	1	0	0	0	0	1	0	0	0	0	1
7	117906741	T	C	10100	11100	33	6	33	5	27	4	30	1	29	1	169	1	0	1	0	0	1	1	1	0	0	1	3
7	119303729	G	A	00001	00011	65	0	76	1	62	0	50	2	46	12	314	0	0	0	0	1	0	0	0	1	1	1	2
7	119483381	G	A	00011	00011	47	0	43	0	56	0	33	17	27	3	226	0	0	0	1	1	0	0	0	1	1	0	2
7	119969258	C	T	00011	00011	46	0	49	0	58	0	37	13	33	13	249	0	0	0	1	1	0	0	0	1	1	0	2
7	121553684	A	G	00011	00011	69	1	73	1	64	0	45	22	51	16	342	0	0	0	1	1	0	0	0	1	1	0	2
7	121862087	C	T	00011	00011	53	0	73	0	57	0	43	26	52	16	320	0	0	0	1	1	0	0	0	1	1	0	2
7	123781243	C	T	11001	11101	27	5	31	4	34	2	32	1	17	3	156	1	1	0	0	1	1	1	1	0	1	1	4
7	124871534	T	C	01000	01000	61	0	57	12	63	0	53	0	51	0	297	0	1	0	0	0	0	1	0	0	0	0	1
7	127379257	A	G	01000	01000	52	0	40	10	53	0	59	0	43	0	257	0	1	0	0	0	0	1	0	0	0	0	1
7	128420565	A	T	10100	10111	25	2	41	1	32	5	44	2	38	3	193	1	0	1	0	0	1	0	1	1	1	2	4
7	130793231	C	T	00011	00011	52	0	49	1	44	0	35	16	53	16	266	0	0	0	1	1	0	0	0	1	1	0	2
7	132164379	G	T	00001	00001	28	0	31	0	41	0	51	0	28	8	187	0	0	0	0	1	0	0	0	0	1	0	1
7	135460649	C	A	00011	00011	44	0	37	0	44	0	35	16	37	5	218	0	0	0	1	1	0	0	0	1	1	0	2
7	135826161	C	A	00011	00011	76	0	73	0	62	0	44	14	40	13	322	0	0	0	1	1	0	0	0	1	1	0	2
7	136211371	C	A	00011	00011	41	0	43	0	46	0	36	14	38	9	227	0	0	0	1	1	0	0	0	1	1	0	2
7	136685314	G	A	10111	10111	25	14	28	1	20	6	17	14	20	4	149	1	0	1	1	1	1	0	1	1	1	0	4
7	136842008	A	G	00100	00100	60	0	78	0	69	9	56	0	74	0	346	0	0	1	0	0	0	0	1	0	0	0	1
7	138006336	G	A	01000	01000	48	0	55	10	51	0	54	0	57	0	275	0	1	0	0	0	0	1	0	0	0	0	1
7	139025522	T	C	00001	00001	49	0	64	0	54	1	61	0	60	9	298	0	0	0	0	1	0	0	0	0	1	0	1
7	140165753	C	T	00010	00010	38	0	40	0	35	0	29	12	34	1	189	0	0	0	1	0	0	0	0	1	0	0	1
7	140370731	G	A	00011	00011	27	0	28	0	30	0	31	11	26	7	160	0	0	0	1	1	0	0	0	1	1	0	2
7	140584790	A	G	00010	10010	48	3	55	0	52	1	42	9	63	0	273	0	0	0	1	0	1	0	0	1	0	1	2
7	140870598	C	A	00010	00010	34	0	27	0	38	0	38	7	43	0	187	0	0	0	1	0	0	0	0	1	0	0	1
7	142117015	G	A	00111	01111	31	1	40	4	58	10	44	5	30	5	228	0	0	1	1	1	0	1	1	1	1	1	4
7	142131999	T	G	00010	11110	31	3	35	2	45	2	34	8	34	1	195	0	0	0	1	0	1	1	1	1	0	3	4
7	142132011	T	G	00010	00110	33	0	41	0	47	2	37	8	32	1	201	0	0	0	1	0	0	0	1	1	0	1	2
7	142132013	C	A	00010	00110	33	0	41	0	45	2	35	9	33	1	199	0	0	0	1	0	0	0	1	1	0	1	2
7	142146934	C	T	01110	11110	55	2	58	6	57	7	49	7	57	1	299	0	1	1	1	0	1	1	1	1	0	1	4
7	142146967	C	T	01110	11110	52	2	47	6	53	7	46	7	50	1	271	0	1	1	1	0	1	1	1	1	0	1	4
7	142154814	G	A	11000	11110	38	7	36	4	50	4	43	2	33	0	217	1	1	0	0	0	1	1	1	1	0	2	4
7	142154821	T	C	11100	11110	36	8	36	5	50	6	44	4	32	0	221	1	1	1	0	0	1	1	1	1	0	1	4
7	142163333	C	T	11000	11110	27	3	31	5	37	2	51	3	29	1	189	1	1	0	0	0	1	1	1	1	0	2	4
7	142456515	A	G	10000	10110	23	7	40	0	30	2	47	3	32	1	185	1	0	0	0	0	1	0	1	1	0	2	3
7	142457166	G	C	11010	11110	30	4	25	8	30	2	43	6	29	1	178	1	1	0	1	0	1	1	1	1	0	1	4
7	142457707	C	T	01100	01111	38	1	32	4	35	6	40	2	35	2	195	0	1	1	0	0	0	1	1	1	1	2	4
7	142460710	T	C	11000	11011	25	2	31	6	37	0	43	4	31	3	182	1	1	0	0	0	1	1	0	1	1	2	4
7	142471281	G	A	01100	11101	35	2	26	3	25	5	39	0	33	2	170	0	1	1	0	0	1	1	1	0	1	2	4
7	142472459	G	A	10010	10111	24	3	28	0	31	2	33	5	41	2	169	1	0	0	1	0	1	0	1	1	1	2	4
7	142474603	C	G	11001	11101	50	7	48	5	42	2	48	1	43	8	254	1	1	0	0	1	1	1	1	0	1	1	4
7	142480396	A	G	10100	11110	47	7	30	3	40	4	57	2	38	1	229	1	0	1	0	0	1	1	1	1	0	2	4
7	142481251	A	C	00100	11101	26	2	33	3	27	9	39	1	29	2	171	0	0	1	0	0	1	1	1	0	1	3	4
7	146287541	A	G	00100	00100	59	0	48	0	57	9	51	0	47	1	272	0	0	1	0	0	0	0	1	0	0	0	1
7	146804574	A	G	00011	00011	62	0	69	0	66	0	39	26	50	18	330	0	0	0	1	1	0	0	0	1	1	0	2
7	148563610	G	A	00011	11011	36	3	37	3	31	1	36	5	34	6	192	0	0	0	1	1	1	1	0	1	1	2	4
7	148678784	C	A	00001	00001	42	1	47	0	43	0	53	1	49	16	252	0	0	0	0	1	0	0	0	0	1	0	1
7	151355113	G	A	01000	01101	32	1	24	5	26	3	26	0	20	2	139	0	1	0	0	0	0	1	1	0	1	2	3
7	152009027	G	A	00010	00010	71	0	74	0	70	0	51	16	69	0	351	0	0	0	1	0	0	0	0	1	0	0	1
7	152074762	C	G	01010	11110	44	2	40	6	45	3	51	8	40	1	240	0	1	0	1	0	1	1	1	1	0	2	4
7	152092526	A	G	01101	01111	51	1	40	7	53	7	64	6	61	8	298	0	1	1	0	1	0	1	1	1	1	1	4
7	152865920	C	T	00010	00010	70	1	55	0	49	0	35	6	53	0	269	0	0	0	1	0	0	0	0	1	0	0	1
7	153312855	A	G	01000	01000	58	1	72	16	74	0	46	0	64	0	331	0	1	0	0	0	0	1	0	0	0	0	1
7	153873364	A	T	00011	00011	41	0	38	0	51	0	41	16	26	5	218	0	0	0	1	1	0	0	0	1	1	0	2
7	154170873	A	G	00100	00100	45	0	56	0	44	10	65	0	54	0	274	0	0	1	0	0	0	0	1	0	0	0	1
7	154432404	G	T	00001	00001	50	0	35	0	35	0	37	0	17	8	182	0	0	0	0	1	0	0	0	0	1	0	1
7	155466187	C	T	01010	11010	64	5	76	9	51	0	49	6	51	1	312	0	1	0	1	0	1	1	0	1	0	1	3
7	155466193	T	C	01010	11010	62	5	72	9	58	0	49	6	57	0	318	0	1	0	1	0	1	1	0	1	0	1	3
7	156151874	C	T	00010	00010	34	1	49	0	57	0	35	10	47	0	233	0	0	0	1	0	0	0	0	1	0	0	1
7	157710429	C	T	00010	00010	30	0	39	0	36	0	37	8	45	0	195	0	0	0	1	0	0	0	0	1	0	0	1
7	157875341	C	T	00011	00011	27	0	30	0	24	0	30	11	24	9	155	0	0	0	1	1	0	0	0	1	1	0	2
7	158516092	C	G	00011	00011	43	0	31	1	41	0	31	9	36	7	199	0	0	0	1	1	0	0	0	1	1	0	2
8	977047	G	A	00011	00011	33	0	36	0	36	0	21	5	26	13	170	0	0	0	1	1	0	0	0	1	1	0	2
8	1179385	C	T	00001	00001	62	0	66	0	58	0	45	1	38	6	276	0	0	0	0	1	0	0	0	0	1	0	1
8	1340814	C	T	00100	00100	29	0	30	0	19	4	46	0	27	0	155	0	0	1	0	0	0	0	1	0	0	0	1
8	1594610	G	T	00001	00001	35	0	29	0	32	0	43	0	22	7	168	0	0	0	0	1	0	0	0	0	1	0	1
8	2548172	T	G	00010	00010	43	0	44	0	42	0	36	6	44	0	215	0	0	0	1	0	0	0	0	1	0	0	1
8	2721393	C	A	00001	00001	58	0	71	0	62	0	51	0	36	11	289	0	0	0	0	1	0	0	0	0	1	0	1
8	3620446	C	T	00011	00011	37	0	36	0	48	0	26	15	24	6	192	0	0	0	1	1	0	0	0	1	1	0	2
8	4708966	T	G	00011	00011	33	0	41	0	49	0	34	10	32	5	204	0	0	0	1	1	0	0	0	1	1	0	2
8	5574066	C	A	00010	00010	46	0	51	0	59	0	43	12	55	0	266	0	0	0	1	0	0	0	0	1	0	0	1
8	6144159	G	A	00011	00011	40	0	24	0	38	0	29	9	21	8	169	0	0	0	1	1	0	0	0	1	1	0	2
8	6437620	G	A	01000	01000	32	1	32	10	29	0	52	0	48	1	205	0	1	0	0	0	0	1	0	0	0	0	1
8	6541138	G	A	00011	00011	50	0	55	0	71	0	40	19	48	7	290	0	0	0	1	1	0	0	0	1	1	0	2
8	9201417	G	A	00001	00001	56	0	43	0	52	0	63	0	34	10	258	0	0	0	0	1	0	0	0	0	1	0	1
8	10253566	C	G	00011	00011	28	0	33	0	38	0	29	16	29	6	179	0	0	0	1	1	0	0	0	1	1	0	2
8	10768867	A	G	10010	11011	28	5	25	2	31	1	17	6	23	2	140	1	0	0	1	0	1	1	0	1	1	2	4
8	12623583	G	A	00010	00010	32	0	38	0	33	0	29	5	50	0	187	0	0	0	1	0	0	0	0	1	0	0	1
8	12942696	A	C	00010	00010	48	0	42	0	44	0	44	7	61	0	246	0	0	0	1	0	0	0	0	1	0	0	1
8	13690277	T	C	01000	01000	75	0	57	13	90	0	59	0	59	0	353	0	1	0	0	0	0	1	0	0	0	0	1
8	14337275	G	T	00001	00011	23	1	26	1	24	1	18	2	17	6	119	0	0	0	0	1	0	0	0	1	1	1	2
8	16214565	A	G	01000	01000	84	1	69	11	68	0	48	0	65	1	347	0	1	0	0	0	0	1	0	0	0	0	1
8	16685086	C	T	11100	11110	27	5	20	3	20	3	21	2	19	1	121	1	1	1	0	0	1	1	1	1	0	1	4
8	17582511	C	T	00011	00011	61	0	74	1	71	0	52	19	50	11	339	0	0	0	1	1	0	0	0	1	1	0	2
8	17789699	A	G	00011	00011	62	0	96	0	66	0	26	17	55	13	335	0	0	0	1	1	0	0	0	1	1	0	2
8	19255671	G	A	01101	01101	31	1	34	5	27	3	22	1	26	3	153	0	1	1	0	1	0	1	1	0	1	0	3
8	19278274	C	T	01000	01000	47	0	39	8	49	0	41	0	57	0	241	0	1	0	0	0	0	1	0	0	0	0	1
8	19676209	A	T	00011	00011	67	0	65	0	60	0	36	10	44	8	290	0	0	0	1	1	0	0	0	1	1	0	2
8	20375319	C	G	00011	00011	42	1	41	0	34	0	34	13	24	7	196	0	0	0	1	1	0	0	0	1	1	0	2
8	21168217	A	G	01011	11011	31	3	26	5	21	0	26	6	19	4	141	0	1	0	1	1	1	1	0	1	1	1	4
8	21445835	G	A	00011	00011	34	0	44	0	38	0	34	14	30	8	202	0	0	0	1	1	0	0	0	1	1	0	2
8	23778630	C	T	00011	00011	54	0	53	0	58	1	44	11	29	15	265	0	0	0	1	1	0	0	0	1	1	0	2
8	24344698	A	G	00011	00011	55	0	58	0	64	0	51	13	32	9	282	0	0	0	1	1	0	0	0	1	1	0	2
8	24426930	G	A	01000	01000	46	0	40	11	49	0	58	0	68	0	272	0	1	0	0	0	0	1	0	0	0	0	1
8	25835805	G	A	00011	00011	26	0	31	0	34	0	30	12	27	4	164	0	0	0	1	1	0	0	0	1	1	0	2
8	30329662	A	G	01000	01000	63	0	69	13	64	0	51	0	85	0	345	0	1	0	0	0	0	1	0	0	0	0	1
8	31161701	G	T	00011	00011	52	0	60	0	66	0	37	22	43	17	297	0	0	0	1	1	0	0	0	1	1	0	2
8	33067677	G	C	00011	00011	77	0	67	0	73	1	44	13	43	15	333	0	0	0	1	1	0	0	0	1	1	0	2
8	35057575	G	T	00010	00010	51	0	51	0	46	0	35	6	49	0	238	0	0	0	1	0	0	0	0	1	0	0	1
8	35680279	C	A	00011	00011	46	0	52	0	71	0	39	15	28	5	256	0	0	0	1	1	0	0	0	1	1	0	2
8	36215640	T	C	00001	00001	47	0	58	0	56	0	52	0	43	16	272	0	0	0	0	1	0	0	0	0	1	0	1
8	36306862	C	A	00011	00011	68	0	67	1	69	0	26	11	55	13	310	0	0	0	1	1	0	0	0	1	1	0	2
8	38933893	A	G	00011	00011	56	0	67	0	66	0	44	10	38	22	303	0	0	0	1	1	0	0	0	1	1	0	2
8	39178565	A	G	01000	01000	55	0	48	9	59	0	46	0	45	0	262	0	1	0	0	0	0	1	0	0	0	0	1
8	39607551	C	T	01000	01000	74	0	55	13	59	0	37	0	64	0	302	0	1	0	0	0	0	1	0	0	0	0	1
8	42234603	C	T	01000	01000	28	0	21	12	35	0	39	0	37	1	173	0	1	0	0	0	0	1	0	0	0	0	1
8	42684283	A	G	00010	00010	53	0	64	0	56	0	47	8	63	0	291	0	0	0	1	0	0	0	0	1	0	0	1
8	43682849	A	C	00011	00011	66	0	81	0	69	0	37	18	43	7	321	0	0	0	1	1	0	0	0	1	1	0	2
8	48397527	G	T	00011	00011	46	0	37	1	35	0	28	14	36	7	204	0	0	0	1	1	0	0	0	1	1	0	2
8	50693939	C	T	00011	00011	54	0	72	0	68	0	37	16	50	18	315	0	0	0	1	1	0	0	0	1	1	0	2
8	52068282	G	A	00010	00010	42	0	53	0	47	0	46	9	56	0	253	0	0	0	1	0	0	0	0	1	0	0	1
8	52257800	G	A	00010	00010	60	0	67	0	63	0	38	8	38	0	274	0	0	0	1	0	0	0	0	1	0	0	1
8	52368872	C	A	00011	00011	43	0	49	0	39	0	46	16	41	12	246	0	0	0	1	1	0	0	0	1	1	0	2
8	52642304	G	A	00010	00010	74	0	61	0	60	0	49	9	57	0	310	0	0	0	1	0	0	0	0	1	0	0	1
8	53999935	C	T	01000	01000	44	0	40	9	57	0	36	0	47	0	233	0	1	0	0	0	0	1	0	0	0	0	1
8	55259546	C	T	00011	00011	33	0	52	0	57	0	35	12	26	16	231	0	0	0	1	1	0	0	0	1	1	0	2
8	57532404	C	G	00011	00011	51	0	54	0	59	0	35	11	32	10	252	0	0	0	1	1	0	0	0	1	1	0	2
8	58098305	C	T	00100	00100	62	0	61	0	63	9	46	0	64	0	305	0	0	1	0	0	0	0	1	0	0	0	1
8	58526347	C	T	00011	00011	31	0	62	1	64	0	41	15	38	8	260	0	0	0	1	1	0	0	0	1	1	0	2
8	60792499	G	T	00011	00011	62	0	70	0	60	0	33	14	46	22	307	0	0	0	1	1	0	0	0	1	1	0	2
8	61191031	T	G	01000	01000	62	0	44	17	55	0	43	0	60	0	281	0	1	0	0	0	0	1	0	0	0	0	1
8	61372412	T	C	10110	10110	30	7	27	1	23	3	28	6	21	1	147	1	0	1	1	0	1	0	1	1	0	0	3
8	61590192	G	A	00001	00001	60	0	58	0	62	0	53	0	57	11	301	0	0	0	0	1	0	0	0	0	1	0	1
8	61594275	C	T	00001	00011	63	0	54	0	48	0	40	2	41	15	263	0	0	0	0	1	0	0	0	1	1	1	2
8	64736426	G	T	00010	00010	65	0	61	1	51	0	46	8	55	0	287	0	0	0	1	0	0	0	0	1	0	0	1
8	66158397	C	T	00001	00001	60	0	62	0	56	0	51	1	42	12	284	0	0	0	0	1	0	0	0	0	1	0	1
8	67671920	T	C	01100	01101	40	1	39	4	39	6	60	1	55	3	248	0	1	1	0	0	0	1	1	0	1	1	3
8	67807385	A	T	00010	00010	63	0	60	0	64	0	36	7	57	0	287	0	0	0	1	0	0	0	0	1	0	0	1
8	68787303	C	T	01000	01000	57	0	48	16	80	0	70	0	43	0	314	0	1	0	0	0	0	1	0	0	0	0	1
8	72569187	G	A	00010	00010	57	0	60	0	60	0	40	11	62	0	290	0	0	0	1	0	0	0	0	1	0	0	1
8	73705701	G	C	01000	01000	53	0	49	10	51	0	46	0	58	0	267	0	1	0	0	0	0	1	0	0	0	0	1
8	76065982	C	T	00010	00010	63	1	56	0	61	0	59	11	74	0	325	0	0	0	1	0	0	0	0	1	0	0	1
8	76605112	C	G	00010	00010	49	0	63	0	63	1	52	8	45	0	281	0	0	0	1	0	0	0	0	1	0	0	1
8	76800464	G	T	00001	00001	63	1	97	0	83	0	49	1	46	30	370	0	0	0	0	1	0	0	0	0	1	0	1
8	77835181	T	C	00011	01111	36	1	41	2	40	4	28	4	38	5	199	0	0	0	1	1	0	1	1	1	1	2	4
8	78694333	T	A	00100	00100	59	0	86	0	70	9	52	0	54	0	330	0	0	1	0	0	0	0	1	0	0	0	1
8	79754809	C	G	00010	00010	40	0	62	0	54	0	49	11	27	0	243	0	0	0	1	0	0	0	0	1	0	0	1
8	81211361	T	C	10001	11001	33	5	30	2	34	0	36	1	25	8	174	1	0	0	0	1	1	1	0	0	1	1	3
8	83143641	C	G	00011	00011	41	0	66	0	69	0	33	21	38	10	278	0	0	0	1	1	0	0	0	1	1	0	2
8	83508312	G	C	01000	01000	43	0	36	7	65	0	52	0	58	0	261	0	1	0	0	0	0	1	0	0	0	0	1
8	83746791	G	A	01000	01000	78	0	59	12	58	0	40	0	71	0	318	0	1	0	0	0	0	1	0	0	0	0	1
8	85764461	C	G	00100	00100	57	0	62	0	36	7	44	0	48	0	254	0	0	1	0	0	0	0	1	0	0	0	1
8	86005675	G	C	00010	00010	41	0	48	0	55	1	24	11	33	0	213	0	0	0	1	0	0	0	0	1	0	0	1
8	86298469	C	A	00011	01011	77	1	96	2	58	0	41	15	51	10	351	0	0	0	1	1	0	1	0	1	1	1	3
8	90216052	C	T	00011	00011	63	0	61	0	63	0	37	14	47	15	300	0	0	0	1	1	0	0	0	1	1	0	2
8	92494231	T	C	00011	00011	44	0	36	0	38	0	20	8	33	5	184	0	0	0	1	1	0	0	0	1	1	0	2
8	93425102	G	A	01000	01100	63	0	64	11	68	2	45	0	70	0	323	0	1	0	0	0	0	1	1	0	0	1	2
8	98898113	C	T	00001	00001	36	0	43	0	29	0	51	0	38	17	214	0	0	0	0	1	0	0	0	0	1	0	1
8	102574013	A	G	00011	00011	63	0	68	0	72	0	32	8	44	13	300	0	0	0	1	1	0	0	0	1	1	0	2
8	102832133	G	T	00011	00011	75	0	46	0	56	0	49	14	37	15	292	0	0	0	1	1	0	0	0	1	1	0	2
8	104143776	C	T	00011	00011	36	0	53	0	53	0	36	19	31	8	236	0	0	0	1	1	0	0	0	1	1	0	2
8	104387183	G	A	00011	00011	49	0	65	0	51	0	36	16	52	9	278	0	0	0	1	1	0	0	0	1	1	0	2
8	105149145	A	G	00011	00011	71	0	77	0	62	0	62	12	53	13	350	0	0	0	1	1	0	0	0	1	1	0	2
8	105515639	C	T	00010	00010	70	0	80	0	89	0	55	15	62	0	371	0	0	0	1	0	0	0	0	1	0	0	1
8	106271395	G	A	00011	00011	56	0	61	1	64	0	39	15	38	13	287	0	0	0	1	1	0	0	0	1	1	0	2
8	106620341	G	T	01000	01000	70	1	59	9	75	0	64	0	52	1	331	0	1	0	0	0	0	1	0	0	0	0	1
8	106973886	C	T	00011	00011	65	0	87	0	80	1	27	15	43	16	334	0	0	0	1	1	0	0	0	1	1	0	2
8	107015483	T	C	00010	00010	65	0	68	1	72	0	42	10	40	0	298	0	0	0	1	0	0	0	0	1	0	0	1
8	112021978	T	G	10000	10000	64	9	77	0	78	0	54	0	47	0	329	1	0	0	0	0	1	0	0	0	0	0	1
8	112098678	A	T	00001	00001	74	0	67	0	70	0	58	1	57	12	339	0	0	0	0	1	0	0	0	0	1	0	1
8	113315740	C	T	00001	00001	49	0	65	0	57	1	51	0	44	11	278	0	0	0	0	1	0	0	0	0	1	0	1
8	113718165	A	G	00100	00100	65	0	71	0	59	9	53	0	60	0	317	0	0	1	0	0	0	0	1	0	0	0	1
8	114544081	A	G	00100	00100	65	0	58	0	72	9	56	0	57	1	318	0	0	1	0	0	0	0	1	0	0	0	1
8	114782046	C	A	00011	00011	42	1	61	0	45	0	47	9	42	15	262	0	0	0	1	1	0	0	0	1	1	0	2
8	115710058	A	G	10000	10000	61	8	57	0	67	0	47	0	74	0	314	1	0	0	0	0	1	0	0	0	0	0	1
8	117359274	C	A	00011	00011	82	0	71	0	53	1	41	14	57	19	338	0	0	0	1	1	0	0	0	1	1	0	2
8	124132519	T	C	00010	00010	67	0	72	0	78	0	59	8	69	0	353	0	0	0	1	0	0	0	0	1	0	0	1
8	124482746	T	G	00010	00010	48	1	44	0	54	0	50	16	43	0	256	0	0	0	1	0	0	0	0	1	0	0	1
8	128307315	C	G	00011	00011	57	0	63	0	66	0	30	14	36	8	274	0	0	0	1	1	0	0	0	1	1	0	2
8	128307829	C	T	00011	00011	63	0	71	0	70	0	36	13	29	13	295	0	0	0	1	1	0	0	0	1	1	0	2
8	129920181	G	A	00010	00010	74	0	92	0	79	0	42	10	71	0	368	0	0	0	1	0	0	0	0	1	0	0	1
8	132443813	G	T	00010	00010	61	1	59	1	64	0	52	13	60	1	312	0	0	0	1	0	0	0	0	1	0	0	1
8	132565529	G	A	00010	00010	56	0	73	0	66	0	47	7	57	0	306	0	0	0	1	0	0	0	0	1	0	0	1
8	133963271	C	A	00010	00010	46	0	42	0	51	1	44	8	41	0	233	0	0	0	1	0	0	0	0	1	0	0	1
8	135933392	A	T	00001	00011	55	0	36	0	50	0	45	3	48	10	247	0	0	0	0	1	0	0	0	1	1	1	2
8	136228532	G	T	00011	00011	59	0	42	0	62	0	39	16	33	9	260	0	0	0	1	1	0	0	0	1	1	0	2
8	137644805	G	A	00010	00010	54	0	42	0	48	0	39	9	50	0	242	0	0	0	1	0	0	0	0	1	0	0	1
8	137920782	C	T	11001	11101	47	5	43	6	42	5	41	1	40	7	237	1	1	0	0	1	1	1	1	0	1	1	4
8	137920784	A	G	11001	11101	45	5	43	4	44	2	40	1	42	5	231	1	1	0	0	1	1	1	1	0	1	1	4
8	138606552	G	A	00011	00011	53	0	46	0	64	0	37	15	33	11	259	0	0	0	1	1	0	0	0	1	1	0	2
8	139404912	A	G	01000	01000	53	1	40	9	41	0	59	1	30	0	234	0	1	0	0	0	0	1	0	0	0	0	1
8	144754404	C	T	00010	00010	27	0	37	0	36	0	33	8	24	0	165	0	0	0	1	0	0	0	0	1	0	0	1
9	243274	A	G	00011	00011	56	0	65	0	55	0	37	18	48	6	285	0	0	0	1	1	0	0	0	1	1	0	2
9	701394	G	A	00011	00011	49	0	49	0	49	0	35	11	33	10	236	0	0	0	1	1	0	0	0	1	1	0	2
9	1292846	C	A	00011	00011	45	0	40	0	63	0	42	13	35	5	243	0	0	0	1	1	0	0	0	1	1	0	2
9	1859611	C	G	00010	00010	48	1	46	1	44	0	48	14	58	0	260	0	0	0	1	0	0	0	0	1	0	0	1
9	2494916	T	A	00011	00011	49	0	43	0	54	0	23	13	42	9	233	0	0	0	1	1	0	0	0	1	1	0	2
9	4253617	G	A	00011	00011	39	0	29	0	50	0	28	19	36	14	215	0	0	0	1	1	0	0	0	1	1	0	2
9	6438721	T	G	00011	10011	72	3	65	0	75	0	32	20	58	16	341	0	0	0	1	1	1	0	0	1	1	1	3
9	7117391	G	C	00001	00001	50	0	56	0	67	0	38	0	51	11	273	0	0	0	0	1	0	0	0	0	1	0	1
9	7377307	G	A	00100	00100	48	0	60	0	56	10	65	0	39	0	278	0	0	1	0	0	0	0	1	0	0	0	1
9	7733002	G	T	00011	00011	56	0	62	0	53	0	40	18	35	15	279	0	0	0	1	1	0	0	0	1	1	0	2
9	8319946	C	T	00011	00011	69	0	57	0	67	0	36	14	43	13	299	0	0	0	1	1	0	0	0	1	1	0	2
9	8769601	C	T	00011	00011	63	0	63	0	67	0	31	10	56	15	305	0	0	0	1	1	0	0	0	1	1	0	2
9	9715390	G	A	00001	00001	73	0	67	0	77	0	54	0	62	9	342	0	0	0	0	1	0	0	0	0	1	0	1
9	10091189	C	T	00011	00011	76	0	64	0	70	0	26	15	48	14	313	0	0	0	1	1	0	0	0	1	1	0	2
9	10634265	G	A	00011	00011	55	0	68	0	64	0	44	17	53	12	313	0	0	0	1	1	0	0	0	1	1	0	2
9	10713678	C	G	00010	00010	73	0	79	0	76	0	38	7	68	0	341	0	0	0	1	0	0	0	0	1	0	0	1
9	10947826	G	A	00011	00011	58	1	67	0	51	1	39	14	35	17	283	0	0	0	1	1	0	0	0	1	1	0	2
9	11059365	C	T	00011	00011	50	0	68	0	65	0	51	15	36	13	298	0	0	0	1	1	0	0	0	1	1	0	2
9	11343538	A	G	00010	00010	66	0	68	0	75	0	35	6	55	0	305	0	0	0	1	0	0	0	0	1	0	0	1
9	12551411	G	A	00001	00001	68	0	61	0	66	0	43	0	39	19	296	0	0	0	0	1	0	0	0	0	1	0	1
9	12968254	C	T	00011	00011	61	0	73	0	53	0	42	12	41	17	299	0	0	0	1	1	0	0	0	1	1	0	2
9	13435139	A	G	00001	10001	60	2	62	0	75	0	53	0	55	9	316	0	0	0	0	1	1	0	0	0	1	1	2
9	13534382	C	T	00011	00011	87	0	66	0	82	0	46	11	39	16	347	0	0	0	1	1	0	0	0	1	1	0	2
9	14589441	G	A	00001	00001	63	0	58	0	54	0	66	0	45	8	294	0	0	0	0	1	0	0	0	0	1	0	1
9	15781555	G	A	00011	00011	38	0	47	0	58	0	40	13	38	15	249	0	0	0	1	1	0	0	0	1	1	0	2
9	16377377	C	G	00010	00010	70	0	63	0	66	0	48	8	56	0	311	0	0	0	1	0	0	0	0	1	0	0	1
9	16833901	C	A	00011	00011	38	0	59	0	55	0	48	13	33	11	257	0	0	0	1	1	0	0	0	1	1	0	2
9	16892649	C	A	00011	00011	26	0	32	0	33	0	14	7	28	5	145	0	0	0	1	1	0	0	0	1	1	0	2
9	17792223	T	A	00001	00011	46	0	61	0	52	0	47	2	34	13	255	0	0	0	0	1	0	0	0	1	1	1	2
9	19258265	A	G	00010	00010	45	0	60	0	62	0	50	9	66	0	292	0	0	0	1	0	0	0	0	1	0	0	1
9	20082067	C	T	00011	00011	34	0	51	0	36	0	28	16	36	8	209	0	0	0	1	1	0	0	0	1	1	0	2
9	23361624	G	T	00100	00100	51	0	58	0	51	9	41	0	36	0	246	0	0	1	0	0	0	0	1	0	0	0	1
9	23977650	T	C	00001	00001	64	0	73	0	62	0	65	0	44	8	316	0	0	0	0	1	0	0	0	0	1	0	1
9	24497598	A	C	00010	00010	47	0	54	1	53	0	50	12	55	0	272	0	0	0	1	0	0	0	0	1	0	0	1
9	28421541	T	C	01000	01000	68	0	48	9	64	0	60	0	55	0	304	0	1	0	0	0	0	1	0	0	0	0	1
9	29397791	G	A	01000	01100	43	0	38	16	50	2	41	0	38	1	229	0	1	0	0	0	0	1	1	0	0	1	2
9	30226669	C	T	00010	00010	50	0	45	0	53	0	30	9	40	1	228	0	0	0	1	0	0	0	0	1	0	0	1
9	30752985	C	T	00010	00010	29	0	41	0	38	0	17	5	36	0	166	0	0	0	1	0	0	0	0	1	0	0	1
9	32772944	G	C	00011	00011	58	0	75	0	54	0	59	18	37	20	321	0	0	0	1	1	0	0	0	1	1	0	2
9	32773510	G	C	00011	00011	75	0	78	0	76	0	43	23	43	15	353	0	0	0	1	1	0	0	0	1	1	0	2
9	32773668	G	C	00011	00011	55	0	62	1	68	0	59	24	40	9	318	0	0	0	1	1	0	0	0	1	1	0	2
9	32773823	G	C	00011	00011	43	0	61	0	50	1	51	20	40	14	280	0	0	0	1	1	0	0	0	1	1	0	2
9	32774145	G	A	00011	00011	57	0	57	0	57	0	46	14	39	12	282	0	0	0	1	1	0	0	0	1	1	0	2
9	32776024	G	A	00011	00011	60	0	67	1	58	0	37	11	38	16	288	0	0	0	1	1	0	0	0	1	1	0	2
9	32776602	G	A	00011	00011	39	0	46	0	43	0	46	14	31	19	238	0	0	0	1	1	0	0	0	1	1	0	2
9	32776712	G	A	00011	00011	32	0	54	0	50	0	40	15	26	23	240	0	0	0	1	1	0	0	0	1	1	0	2
9	32777420	G	T	00011	00011	26	0	22	0	25	0	26	4	16	6	125	0	0	0	1	1	0	0	0	1	1	0	2
9	32778700	G	A	00011	00011	48	0	52	0	52	0	43	22	37	14	268	0	0	0	1	1	0	0	0	1	1	0	2
9	33795703	C	T	11000	11011	26	7	28	3	43	0	29	2	23	2	163	1	1	0	0	0	1	1	0	1	1	2	4
9	33795707	C	G	11000	11011	26	7	28	3	43	0	29	2	25	2	165	1	1	0	0	0	1	1	0	1	1	2	4
9	33795813	C	T	01000	01111	32	1	35	6	49	5	38	3	33	3	205	0	1	0	0	0	0	1	1	1	1	3	4
9	33797991	G	A	10110	11110	28	6	26	2	33	4	38	5	25	1	168	1	0	1	1	0	1	1	1	1	0	1	4
9	33797992	C	T	10110	11110	29	5	26	2	33	5	38	5	26	1	170	1	0	1	1	0	1	1	1	1	0	1	4
9	33798237	G	T	01101	11101	49	2	24	3	42	4	41	1	30	4	200	0	1	1	0	1	1	1	1	0	1	1	4
9	35419009	G	A	00011	00011	53	0	59	0	69	1	31	15	46	17	291	0	0	0	1	1	0	0	0	1	1	0	2
9	36077425	G	T	00011	00011	62	0	73	0	68	0	33	17	40	19	312	0	0	0	1	1	0	0	0	1	1	0	2
9	36323946	G	A	00011	00011	38	0	33	0	49	0	31	15	24	13	203	0	0	0	1	1	0	0	0	1	1	0	2
9	44877813	G	T	10001	10011	18	3	35	0	31	1	49	4	35	5	181	1	0	0	0	1	1	0	0	1	1	1	3
9	71652409	A	T	01000	01000	40	0	22	5	34	0	32	0	39	1	173	0	1	0	0	0	0	1	0	0	0	0	1
9	72520026	A	T	10000	10000	75	10	81	0	70	0	66	0	86	0	388	1	0	0	0	0	1	0	0	0	0	0	1
9	73289465	A	G	00011	00011	34	0	57	0	56	0	36	13	29	5	230	0	0	0	1	1	0	0	0	1	1	0	2
9	73895347	C	T	00001	00001	49	0	38	0	51	0	42	0	47	8	235	0	0	0	0	1	0	0	0	0	1	0	1
9	74306780	G	A	00001	00001	54	0	49	0	53	0	44	0	49	8	257	0	0	0	0	1	0	0	0	0	1	0	1
9	74729190	C	A	00001	00001	43	0	41	0	49	0	46	0	23	5	207	0	0	0	0	1	0	0	0	0	1	0	1
9	75427862	G	A	00001	00001	51	0	64	0	49	0	54	1	43	10	272	0	0	0	0	1	0	0	0	0	1	0	1
9	75928557	C	A	00001	00001	36	1	27	0	47	0	58	0	29	5	203	0	0	0	0	1	0	0	0	0	1	0	1
9	76312211	G	C	00001	00001	64	0	65	0	80	0	49	1	45	14	318	0	0	0	0	1	0	0	0	0	1	0	1
9	78159572	G	T	00001	00001	52	0	48	0	46	0	48	0	46	8	248	0	0	0	0	1	0	0	0	0	1	0	1
9	81302823	C	T	00001	00001	42	0	53	0	70	1	50	0	31	10	257	0	0	0	0	1	0	0	0	0	1	0	1
9	82792168	A	G	00011	00011	57	0	49	0	55	0	25	13	34	5	238	0	0	0	1	1	0	0	0	1	1	0	2
9	87788079	G	A	01000	01000	62	0	43	9	45	0	56	0	47	0	262	0	1	0	0	0	0	1	0	0	0	0	1
9	88710139	T	C	00010	00010	38	0	35	0	43	0	50	12	51	0	229	0	0	0	1	0	0	0	0	1	0	0	1
9	89530388	C	T	00001	00001	48	0	46	0	75	0	58	0	39	12	278	0	0	0	0	1	0	0	0	0	1	0	1
9	89948831	C	G	00011	00011	52	0	53	0	54	0	45	14	44	12	274	0	0	0	1	1	0	0	0	1	1	0	2
9	90945963	A	G	00011	00011	29	0	30	0	29	0	24	6	22	6	146	0	0	0	1	1	0	0	0	1	1	0	2
9	91597771	C	G	01000	01000	98	0	57	10	60	0	33	0	72	0	330	0	1	0	0	0	0	1	0	0	0	0	1
9	94015103	C	T	01000	01000	57	0	48	9	52	0	59	0	62	0	287	0	1	0	0	0	0	1	0	0	0	0	1
9	94328490	C	T	00010	00010	43	1	34	0	45	0	50	9	38	0	220	0	0	0	1	0	0	0	0	1	0	0	1
9	96446657	C	T	00010	00010	25	0	21	0	21	0	17	8	28	0	120	0	0	0	1	0	0	0	0	1	0	0	1
9	97275162	G	A	00010	00010	49	0	64	0	40	0	45	8	53	0	259	0	0	0	1	0	0	0	0	1	0	0	1
9	99063716	T	C	01011	11011	29	3	32	4	26	1	26	6	34	7	168	0	1	0	1	1	1	1	0	1	1	1	4
9	99063720	T	C	00011	11011	29	2	28	3	26	1	26	5	34	6	160	0	0	0	1	1	1	1	0	1	1	2	4
9	100483448	C	T	00011	00011	49	0	43	1	46	0	34	14	26	11	224	0	0	0	1	1	0	0	0	1	1	0	2
9	101330368	G	A	00010	00010	25	0	20	0	35	0	31	6	30	0	147	0	0	0	1	0	0	0	0	1	0	0	1
9	102942515	G	C	01011	01111	34	1	31	4	42	3	40	5	35	5	200	0	1	0	1	1	0	1	1	1	1	1	4
9	103879496	T	A	00011	00011	33	1	48	0	53	0	45	15	37	10	242	0	0	0	1	1	0	0	0	1	1	0	2
9	104141525	C	T	00010	00010	51	0	44	0	61	0	54	8	38	1	257	0	0	0	1	0	0	0	0	1	0	0	1
9	104807549	T	A	10000	10000	56	8	84	0	80	0	48	0	55	0	331	1	0	0	0	0	1	0	0	0	0	0	1
9	106345029	G	T	10000	10000	45	7	53	0	56	0	58	0	45	0	264	1	0	0	0	0	1	0	0	0	0	0	1
9	106628183	C	A	00011	00011	76	0	75	1	75	0	34	10	38	18	327	0	0	0	1	1	0	0	0	1	1	0	2
9	106658071	C	T	00011	00011	65	0	76	0	62	1	48	22	42	9	325	0	0	0	1	1	0	0	0	1	1	0	2
9	112180658	T	C	00001	00001	32	0	30	0	37	0	43	1	27	6	176	0	0	0	0	1	0	0	0	0	1	0	1
9	114022137	C	A	00011	00011	41	1	48	0	51	0	36	17	37	10	241	0	0	0	1	1	0	0	0	1	1	0	2
9	114809650	G	A	10000	10000	36	7	62	0	48	0	45	0	55	0	253	1	0	0	0	0	1	0	0	0	0	0	1
9	118560863	G	T	00011	00011	59	0	72	0	58	0	46	13	47	14	309	0	0	0	1	1	0	0	0	1	1	0	2
9	118630463	C	T	00010	10010	77	2	68	0	77	0	31	8	62	0	325	0	0	0	1	0	1	0	0	1	0	1	2
9	122101188	C	A	00011	00011	40	1	33	0	45	1	26	13	27	10	196	0	0	0	1	1	0	0	0	1	1	0	2
9	122734549	G	A	00100	00100	47	1	56	0	47	9	44	0	51	0	255	0	0	1	0	0	0	0	1	0	0	0	1
9	123182204	G	A	00010	00010	49	0	42	0	45	0	27	13	50	0	226	0	0	0	1	0	0	0	0	1	0	0	1
9	123356834	T	C	00010	00010	37	0	35	0	43	0	45	10	40	0	210	0	0	0	1	0	0	0	0	1	0	0	1
9	123853091	C	T	00011	00011	63	0	69	0	69	0	37	8	50	12	308	0	0	0	1	1	0	0	0	1	1	0	2
9	124034916	A	T	00001	00001	49	0	53	0	60	0	49	0	48	7	266	0	0	0	0	1	0	0	0	0	1	0	1
9	124100901	G	C	00011	00011	50	0	42	0	74	0	54	17	54	17	308	0	0	0	1	1	0	0	0	1	1	0	2
9	125068545	C	T	00001	00001	56	0	43	0	60	0	50	0	39	8	256	0	0	0	0	1	0	0	0	0	1	0	1
9	126250918	G	A	00001	00001	30	0	27	0	28	1	41	1	20	10	158	0	0	0	0	1	0	0	0	0	1	0	1
9	130176081	C	T	10001	10101	26	5	23	1	31	2	36	0	21	3	148	1	0	0	0	1	1	0	1	0	1	1	3
9	130176122	T	G	10001	10101	27	5	25	1	30	2	40	0	25	3	158	1	0	0	0	1	1	0	1	0	1	1	3
9	130229770	G	C	01000	11101	43	3	44	7	51	2	49	1	45	3	248	0	1	0	0	0	1	1	1	0	1	3	4
9	131266457	T	G	00100	00100	37	0	32	0	33	6	38	0	34	1	181	0	0	1	0	0	0	0	1	0	0	0	1
9	133677255	T	A	00010	00010	37	0	62	0	58	0	57	9	61	0	284	0	0	0	1	0	0	0	0	1	0	0	1
9	133687893	G	C	00010	00010	60	0	58	0	45	0	35	11	50	0	259	0	0	0	1	0	0	0	0	1	0	0	1
9	133871802	A	G	10000	10010	33	6	21	0	33	0	41	4	48	0	186	1	0	0	0	0	1	0	0	1	0	1	2
9	135253276	G	A	10011	10111	25	2	34	1	45	3	47	7	46	4	214	1	0	0	1	1	1	0	1	1	1	1	4
9	137541481	A	G	00011	00011	31	0	24	1	38	0	21	9	28	7	159	0	0	0	1	1	0	0	0	1	1	0	2
9	138054206	G	A	01010	11011	17	3	19	2	22	1	27	6	24	3	124	0	1	0	1	0	1	1	0	1	1	2	4
9	138101801	C	T	01000	01000	34	0	22	5	46	0	42	0	35	0	184	0	1	0	0	0	0	1	0	0	0	0	1
9	139042401	C	A	10000	10000	22	5	23	0	21	0	23	0	23	0	117	1	0	0	0	0	1	0	0	0	0	0	1
10	110284	T	A	01111	01111	28	1	23	5	13	9	16	5	20	5	125	0	1	1	1	1	0	1	1	1	1	0	4
10	2110204	T	C	00011	00011	50	0	46	0	41	0	29	9	28	19	222	0	0	0	1	1	0	0	0	1	1	0	2
10	3632032	C	A	00001	00001	48	0	34	0	51	0	52	0	42	7	234	0	0	0	0	1	0	0	0	0	1	0	1
10	4034865	C	T	00100	00100	32	0	24	0	30	5	41	0	35	0	167	0	0	1	0	0	0	0	1	0	0	0	1
10	4550637	T	C	00010	00010	44	0	41	0	45	0	32	11	46	0	219	0	0	0	1	0	0	0	0	1	0	0	1
10	6717430	C	T	01000	01000	54	0	41	9	42	0	53	1	46	0	246	0	1	0	0	0	0	1	0	0	0	0	1
10	7051769	G	A	00011	00011	42	1	47	0	39	0	35	8	37	10	219	0	0	0	1	1	0	0	0	1	1	0	2
10	7568209	C	T	00001	00001	28	0	30	0	30	0	34	0	33	11	166	0	0	0	0	1	0	0	0	0	1	0	1
10	9095338	T	A	00001	00001	68	0	90	0	73	0	58	1	82	16	388	0	0	0	0	1	0	0	0	0	1	0	1
10	11158408	G	A	01000	01000	54	0	51	11	53	0	70	0	55	0	294	0	1	0	0	0	0	1	0	0	0	0	1
10	11422633	A	G	00011	00011	36	0	24	0	40	0	24	13	23	11	171	0	0	0	1	1	0	0	0	1	1	0	2
10	16229952	C	A	00010	00010	47	0	52	0	47	0	39	7	39	0	231	0	0	0	1	0	0	0	0	1	0	0	1
10	18512218	C	T	00011	00011	56	0	53	0	56	0	39	10	38	12	264	0	0	0	1	1	0	0	0	1	1	0	2
10	20418265	A	G	00001	00001	59	0	69	0	84	0	50	1	31	12	306	0	0	0	0	1	0	0	0	0	1	0	1
10	22508174	C	G	00011	00011	42	0	47	0	57	0	36	17	21	4	224	0	0	0	1	1	0	0	0	1	1	0	2
10	22888756	C	G	00011	00011	52	0	66	1	50	0	34	16	43	17	279	0	0	0	1	1	0	0	0	1	1	0	2
10	23314511	G	A	10000	10000	44	7	58	0	48	0	55	0	54	1	267	1	0	0	0	0	1	0	0	0	0	0	1
10	23910457	G	A	00010	00010	30	0	46	0	44	0	27	10	46	0	203	0	0	0	1	0	0	0	0	1	0	0	1
10	24882541	C	G	10000	10000	40	8	49	0	40	0	24	0	31	0	192	1	0	0	0	0	1	0	0	0	0	0	1
10	25745118	T	C	00010	00010	63	0	74	0	85	0	60	10	56	0	348	0	0	0	1	0	0	0	0	1	0	0	1
10	26800372	G	T	01000	01000	40	0	40	8	63	0	49	0	54	0	254	0	1	0	0	0	0	1	0	0	0	0	1
10	26835895	C	T	00010	00010	51	0	70	0	53	0	47	8	38	0	267	0	0	0	1	0	0	0	0	1	0	0	1
10	27463927	A	G	00011	00011	48	0	27	0	35	0	20	8	20	4	162	0	0	0	1	1	0	0	0	1	1	0	2
10	33435482	A	T	00011	00011	42	0	30	0	59	0	44	12	46	15	248	0	0	0	1	1	0	0	0	1	1	0	2
10	34273722	C	T	00010	00010	45	0	60	0	59	0	41	10	43	0	258	0	0	0	1	0	0	0	0	1	0	0	1
10	34824813	A	G	10000	10000	48	9	52	0	62	0	50	0	43	0	264	1	0	0	0	0	1	0	0	0	0	0	1
10	35862906	G	A	00001	00001	43	0	39	0	43	0	47	1	38	7	218	0	0	0	0	1	0	0	0	0	1	0	1
10	37116197	T	A	00011	00011	62	0	69	0	55	0	48	21	46	18	319	0	0	0	1	1	0	0	0	1	1	0	2
10	37877789	C	T	00011	00011	46	0	41	0	54	0	36	14	42	11	244	0	0	0	1	1	0	0	0	1	1	0	2
10	38803596	C	G	10100	11101	48	6	84	4	68	9	45	1	73	7	345	1	0	1	0	0	1	1	1	0	1	2	4
10	38818823	T	A	11000	11110	23	3	38	8	34	3	27	2	33	0	171	1	1	0	0	0	1	1	1	1	0	2	4
10	38883970	G	T	00011	01111	46	0	88	4	76	4	47	7	68	6	346	0	0	0	1	1	0	1	1	1	1	2	4
10	42632894	T	A	11001	11001	23	2	17	3	32	1	24	1	18	3	124	1	1	0	0	1	1	1	0	0	1	0	3
10	42871498	C	T	00011	00011	53	0	60	0	72	0	41	19	36	15	296	0	0	0	1	1	0	0	0	1	1	0	2
10	43719146	A	C	00011	00011	47	0	41	0	41	0	30	9	34	15	217	0	0	0	1	1	0	0	0	1	1	0	2
10	43805400	T	C	00011	00011	46	0	38	1	47	0	49	20	36	11	248	0	0	0	1	1	0	0	0	1	1	0	2
10	44433192	A	T	00011	00011	38	0	57	0	45	0	36	8	43	15	242	0	0	0	1	1	0	0	0	1	1	0	2
10	44693346	T	G	00011	01011	31	1	30	2	42	0	35	10	28	7	186	0	0	0	1	1	0	1	0	1	1	1	3
10	47623265	C	T	00010	00011	24	1	26	1	22	0	27	5	26	2	134	0	0	0	1	0	0	0	0	1	1	1	2
10	52760832	T	A	00011	00011	64	0	66	1	69	0	46	20	51	14	331	0	0	0	1	1	0	0	0	1	1	0	2
10	54371371	C	A	00010	00010	42	0	53	0	44	0	34	17	40	1	231	0	0	0	1	0	0	0	0	1	0	0	1
10	54564458	T	C	00011	00011	52	0	65	1	68	0	40	17	36	16	295	0	0	0	1	1	0	0	0	1	1	0	2
10	55966083	C	G	00011	00011	45	0	55	0	67	0	55	9	50	21	302	0	0	0	1	1	0	0	0	1	1	0	2
10	55993146	C	T	00011	00011	60	0	68	1	54	0	45	17	43	11	299	0	0	0	1	1	0	0	0	1	1	0	2
10	57466077	C	T	00011	00011	62	0	72	1	67	0	36	14	41	11	304	0	0	0	1	1	0	0	0	1	1	0	2
10	57730554	G	A	01000	01000	41	0	36	9	52	0	66	0	55	0	259	0	1	0	0	0	0	1	0	0	0	0	1
10	61084528	C	T	10000	10000	41	8	61	0	65	0	55	0	57	0	287	1	0	0	0	0	1	0	0	0	0	0	1
10	61623737	A	C	01000	01000	90	0	63	9	77	0	50	0	89	0	378	0	1	0	0	0	0	1	0	0	0	0	1
10	62021569	A	T	00010	00010	42	0	47	0	58	0	56	9	55	0	267	0	0	0	1	0	0	0	0	1	0	0	1
10	62493314	G	A	00011	00011	22	0	24	0	31	0	16	9	16	14	132	0	0	0	1	1	0	0	0	1	1	0	2
10	63224372	A	G	00011	01011	62	1	80	2	67	0	46	20	47	12	337	0	0	0	1	1	0	1	0	1	1	1	3
10	63986844	C	T	00001	00001	61	0	64	0	57	0	67	0	53	13	315	0	0	0	0	1	0	0	0	0	1	0	1
10	64794660	C	A	00011	00011	32	0	51	0	37	0	47	7	43	13	230	0	0	0	1	1	0	0	0	1	1	0	2
10	66603512	C	T	00010	00010	60	0	70	0	70	0	62	12	60	0	334	0	0	0	1	0	0	0	0	1	0	0	1
10	68111636	T	C	00011	00011	73	0	55	0	57	0	26	17	41	19	288	0	0	0	1	1	0	0	0	1	1	0	2
10	68971373	T	C	00011	00011	67	0	52	0	60	0	37	11	51	17	295	0	0	0	1	1	0	0	0	1	1	0	2
10	70024501	G	A	00100	00100	38	1	41	1	22	5	51	0	32	1	192	0	0	1	0	0	0	0	1	0	0	0	1
10	73582328	G	T	01000	01000	53	1	37	14	54	0	31	0	24	1	215	0	1	0	0	0	0	1	0	0	0	0	1
10	74135652	T	A	10000	10000	41	8	34	0	43	0	38	0	23	0	187	1	0	0	0	0	1	0	0	0	0	0	1
10	75487258	G	C	00110	11110	57	3	62	2	70	7	38	6	67	1	313	0	0	1	1	0	1	1	1	1	0	2	4
10	76234068	C	T	00001	00001	43	0	53	0	46	0	37	0	22	7	208	0	0	0	0	1	0	0	0	0	1	0	1
10	79253998	G	A	00011	00011	36	0	37	0	34	0	17	13	24	9	170	0	0	0	1	1	0	0	0	1	1	0	2
10	81316496	A	G	11100	11100	26	5	20	4	40	7	28	1	20	0	151	1	1	1	0	0	1	1	1	0	0	0	3
10	82500405	G	A	00100	00100	31	0	41	0	41	6	43	0	33	0	195	0	0	1	0	0	0	0	1	0	0	0	1
10	84099307	C	T	01000	01000	51	0	54	12	57	0	41	0	49	0	264	0	1	0	0	0	0	1	0	0	0	0	1
10	87803457	A	G	00001	00001	37	0	39	0	39	0	36	0	21	7	179	0	0	0	0	1	0	0	0	0	1	0	1
10	97588329	T	C	00001	00001	51	0	37	0	44	0	32	1	16	14	195	0	0	0	0	1	0	0	0	0	1	0	1
10	99780039	C	T	01000	01000	37	0	26	9	31	0	23	0	32	0	158	0	1	0	0	0	0	1	0	0	0	0	1
10	102432170	T	C	10111	10111	25	5	25	1	23	4	26	4	16	4	133	1	0	1	1	1	1	0	1	1	1	0	4
10	105838151	A	T	00011	00011	59	0	63	1	76	0	38	17	46	20	320	0	0	0	1	1	0	0	0	1	1	0	2
10	106157197	C	T	00011	00011	66	0	81	1	53	0	42	21	42	17	323	0	0	0	1	1	0	0	0	1	1	0	2
10	107211070	G	T	00100	00100	62	0	86	0	60	11	47	0	60	0	326	0	0	1	0	0	0	0	1	0	0	0	1
10	107790352	A	T	00001	00001	76	0	76	0	79	0	58	0	56	9	354	0	0	0	0	1	0	0	0	0	1	0	1
10	107838681	C	T	00011	00011	58	0	78	0	70	0	49	15	50	13	333	0	0	0	1	1	0	0	0	1	1	0	2
10	110421837	C	A	00011	00011	73	0	53	0	51	1	42	9	34	16	279	0	0	0	1	1	0	0	0	1	1	0	2
10	110783444	G	A	00011	00011	62	0	68	1	64	0	40	23	46	11	315	0	0	0	1	1	0	0	0	1	1	0	2
10	111178205	G	A	00011	00011	60	0	61	0	53	0	41	11	37	13	276	0	0	0	1	1	0	0	0	1	1	0	2
10	113132825	C	T	00001	00001	42	0	38	0	53	0	56	0	36	7	232	0	0	0	0	1	0	0	0	0	1	0	1
10	117077703	G	A	01000	01000	54	0	49	11	66	0	62	0	50	0	292	0	1	0	0	0	0	1	0	0	0	0	1
10	117397220	C	T	00010	00010	29	0	40	0	29	1	25	7	22	1	154	0	0	0	1	0	0	0	0	1	0	0	1
10	122162285	C	T	00011	00011	29	0	35	0	51	0	34	15	34	14	212	0	0	0	1	1	0	0	0	1	1	0	2
10	122275839	C	T	00010	00010	40	1	52	0	42	0	42	7	34	0	218	0	0	0	1	0	0	0	0	1	0	0	1
10	122836431	G	C	00011	00011	28	0	44	0	44	0	39	17	37	11	220	0	0	0	1	1	0	0	0	1	1	0	2
10	123331760	C	A	00011	00011	35	0	37	0	36	0	43	8	29	8	196	0	0	0	1	1	0	0	0	1	1	0	2
10	126736913	A	C	00011	00011	37	0	24	0	34	0	23	7	20	6	151	0	0	0	1	1	0	0	0	1	1	0	2
10	128020356	T	C	00011	00011	54	1	31	0	33	0	38	13	19	10	199	0	0	0	1	1	0	0	0	1	1	0	2
10	129415850	C	T	00011	00011	34	0	45	0	37	0	39	14	24	9	202	0	0	0	1	1	0	0	0	1	1	0	2
10	131061794	A	G	00011	00011	62	0	75	0	50	0	44	7	41	14	293	0	0	0	1	1	0	0	0	1	1	0	2
10	133807471	G	T	01000	01000	57	0	36	9	60	0	50	0	49	0	261	0	1	0	0	0	0	1	0	0	0	0	1
10	133885354	T	C	01111	01111	21	1	22	4	20	2	20	3	23	2	118	0	1	1	1	1	0	1	1	1	1	0	4
10	134392000	G	A	01101	11101	25	2	19	3	29	5	44	1	16	9	153	0	1	1	0	1	1	1	1	0	1	1	4
10	135177659	G	A	00011	00011	26	0	30	0	26	0	28	9	26	7	152	0	0	0	1	1	0	0	0	1	1	0	2
11	133803	A	T	11000	11100	18	2	16	4	31	2	20	1	28	0	122	1	1	0	0	0	1	1	1	0	0	1	3
11	6285312	C	A	00010	00010	65	0	55	0	61	0	41	7	67	0	296	0	0	0	1	0	0	0	0	1	0	0	1
11	6466640	C	G	00011	00011	32	0	46	0	31	0	48	15	26	10	208	0	0	0	1	1	0	0	0	1	1	0	2
11	7100022	A	G	00001	00001	41	0	41	0	52	0	49	0	36	7	226	0	0	0	0	1	0	0	0	0	1	0	1
11	9240973	A	T	00001	00001	71	0	46	0	61	1	43	0	45	12	279	0	0	0	0	1	0	0	0	0	1	0	1
11	14220201	C	A	00011	00011	50	0	44	0	32	0	50	8	29	3	216	0	0	0	1	1	0	0	0	1	1	0	2
11	14399578	A	G	00010	11011	58	5	41	3	50	1	29	10	41	3	241	0	0	0	1	0	1	1	0	1	1	3	4
11	21001976	G	T	00011	00011	58	0	56	0	53	0	40	12	33	10	262	0	0	0	1	1	0	0	0	1	1	0	2
11	21753002	G	T	00011	00011	71	0	63	0	52	1	42	12	50	12	303	0	0	0	1	1	0	0	0	1	1	0	2
11	21850911	C	G	00011	00011	64	0	52	0	63	0	43	16	41	26	305	0	0	0	1	1	0	0	0	1	1	0	2
11	23885346	T	C	01000	01000	59	0	53	10	73	0	54	0	59	0	308	0	1	0	0	0	0	1	0	0	0	0	1
11	24501894	C	G	00011	00011	58	0	75	0	70	0	41	15	44	17	320	0	0	0	1	1	0	0	0	1	1	0	2
11	26631096	G	A	00011	00011	31	0	36	0	48	0	32	14	30	13	204	0	0	0	1	1	0	0	0	1	1	0	2
11	26818693	G	A	00010	00010	55	1	67	0	66	0	33	10	55	0	287	0	0	0	1	0	0	0	0	1	0	0	1
11	27526159	C	T	00011	00011	57	0	64	0	63	0	32	17	48	17	298	0	0	0	1	1	0	0	0	1	1	0	2
11	27670314	C	G	01000	01000	31	0	36	11	48	0	45	0	40	0	211	0	1	0	0	0	0	1	0	0	0	0	1
11	28108526	A	T	00011	00011	65	0	66	0	44	1	29	10	26	12	253	0	0	0	1	1	0	0	0	1	1	0	2
11	28824868	C	G	00011	00011	69	0	64	0	53	0	50	15	42	12	305	0	0	0	1	1	0	0	0	1	1	0	2
11	29732051	G	A	00001	00001	42	0	55	0	46	0	53	1	30	7	234	0	0	0	0	1	0	0	0	0	1	0	1
11	29797161	G	A	00010	00010	59	0	57	0	60	0	49	15	54	0	294	0	0	0	1	0	0	0	0	1	0	0	1
11	30091835	G	T	01000	01000	60	0	49	11	80	0	58	0	56	0	314	0	1	0	0	0	0	1	0	0	0	0	1
11	30342119	C	A	00011	00011	64	0	62	0	66	0	36	23	44	10	305	0	0	0	1	1	0	0	0	1	1	0	2
11	30439309	C	A	00011	00011	57	0	45	0	50	0	36	14	26	11	239	0	0	0	1	1	0	0	0	1	1	0	2
11	32279102	C	T	01000	01000	57	0	47	14	50	0	44	1	45	0	258	0	1	0	0	0	0	1	0	0	0	0	1
11	32436579	C	A	00011	00011	50	0	46	0	43	0	28	13	37	7	224	0	0	0	1	1	0	0	0	1	1	0	2
11	33050252	A	G	01000	01000	54	0	55	9	73	0	47	0	46	0	284	0	1	0	0	0	0	1	0	0	0	0	1
11	33540386	T	C	00011	00011	51	0	54	0	55	0	39	8	40	10	257	0	0	0	1	1	0	0	0	1	1	0	2
11	33579150	G	A	00011	00011	52	0	53	0	50	0	32	13	33	4	237	0	0	0	1	1	0	0	0	1	1	0	2
11	34084341	T	G	00010	00010	66	0	56	0	47	0	41	8	46	0	264	0	0	0	1	0	0	0	0	1	0	0	1
11	35239112	G	A	00001	00001	55	0	55	1	57	0	60	0	37	14	279	0	0	0	0	1	0	0	0	0	1	0	1
11	35455369	G	T	00111	00111	19	1	27	1	32	7	24	7	27	5	150	0	0	1	1	1	0	0	1	1	1	0	3
11	35680381	A	T	00011	00011	53	0	47	0	37	1	33	15	32	8	226	0	0	0	1	1	0	0	0	1	1	0	2
11	39155833	T	C	00010	00010	36	0	61	0	49	0	41	7	32	0	226	0	0	0	1	0	0	0	0	1	0	0	1
11	39771977	T	A	00001	00011	61	0	67	0	72	0	52	3	48	12	315	0	0	0	0	1	0	0	0	1	1	1	2
11	40845919	A	T	00010	00010	67	0	63	0	52	0	38	14	56	0	290	0	0	0	1	0	0	0	0	1	0	0	1
11	41596744	C	T	00010	00010	67	0	83	0	79	0	56	7	57	0	349	0	0	0	1	0	0	0	0	1	0	0	1
11	41978466	G	A	01000	01000	39	0	35	7	43	0	50	0	37	0	211	0	1	0	0	0	0	1	0	0	0	0	1
11	42240493	A	C	00011	00011	80	0	87	0	88	0	58	21	50	18	402	0	0	0	1	1	0	0	0	1	1	0	2
11	42496209	G	A	00010	00010	52	1	51	0	42	1	48	9	47	0	251	0	0	0	1	0	0	0	0	1	0	0	1
11	43862540	A	C	00001	00001	64	0	84	1	81	0	66	0	55	24	375	0	0	0	0	1	0	0	0	0	1	0	1
11	45215715	C	T	00011	00011	40	0	31	0	46	0	27	15	18	7	184	0	0	0	1	1	0	0	0	1	1	0	2
11	47338126	G	C	01010	11010	36	2	27	6	37	1	33	6	36	1	185	0	1	0	1	0	1	1	0	1	0	1	3
11	48460795	C	A	00010	00010	62	0	79	0	65	0	42	15	69	1	333	0	0	0	1	0	0	0	0	1	0	0	1
11	48833964	G	T	00001	01111	67	1	73	4	94	2	56	4	54	7	362	0	0	0	0	1	0	1	1	1	1	3	4
11	48996087	C	T	01000	01000	52	0	42	15	70	0	64	0	40	0	283	0	1	0	0	0	0	1	0	0	0	0	1
11	49228013	A	G	00001	00011	59	0	53	0	65	0	53	2	31	9	272	0	0	0	0	1	0	0	0	1	1	1	2
11	49717257	A	G	11101	11101	38	9	35	8	32	5	19	1	25	10	182	1	1	1	0	1	1	1	1	0	1	0	4
11	50162790	C	T	01000	01000	57	0	40	9	56	0	61	0	61	0	284	0	1	0	0	0	0	1	0	0	0	0	1
11	50256464	G	T	10100	10110	30	6	40	1	37	4	39	3	36	0	196	1	0	1	0	0	1	0	1	1	0	1	3
11	50256466	T	C	10100	10110	30	6	40	1	38	4	39	3	36	0	197	1	0	1	0	0	1	0	1	1	0	1	3
11	50256476	G	A	11110	11110	30	7	38	4	38	4	43	5	35	0	204	1	1	1	1	0	1	1	1	1	0	0	4
11	50258953	T	C	10000	11101	27	6	34	2	37	3	43	0	41	3	196	1	0	0	0	0	1	1	1	0	1	3	4
11	50461018	C	A	00001	00001	49	0	74	0	48	1	43	0	32	11	258	0	0	0	0	1	0	0	0	0	1	0	1
11	50554160	G	T	00110	11110	56	4	76	5	78	8	62	8	64	1	362	0	0	1	1	0	1	1	1	1	0	2	4
11	50754259	G	A	01101	01111	60	1	64	11	63	7	56	4	49	6	321	0	1	1	0	1	0	1	1	1	1	1	4
11	51352716	T	G	01100	01100	40	0	37	6	40	6	30	1	32	1	193	0	1	1	0	0	0	1	1	0	0	0	2
11	51361046	G	T	11001	11001	29	6	38	5	38	1	29	1	27	3	177	1	1	0	0	1	1	1	0	0	1	0	3
11	54848439	G	A	00001	00001	62	0	74	0	76	0	56	0	46	7	321	0	0	0	0	1	0	0	0	0	1	0	1
11	55115673	A	T	01001	11101	64	3	70	6	83	4	56	0	54	8	348	0	1	0	0	1	1	1	1	0	1	2	4
11	55341159	T	A	00001	00001	74	0	70	0	64	0	57	1	57	10	333	0	0	0	0	1	0	0	0	0	1	0	1
11	55556148	G	T	00011	00011	57	1	76	0	73	0	45	23	45	17	337	0	0	0	1	1	0	0	0	1	1	0	2
11	56277765	T	A	00001	00001	56	0	56	0	72	1	52	0	41	7	285	0	0	0	0	1	0	0	0	0	1	0	1
11	56421370	C	T	00010	00010	66	0	66	0	79	0	55	10	60	0	336	0	0	0	1	0	0	0	0	1	0	0	1
11	56831549	G	C	00011	00011	58	0	53	0	59	0	55	14	43	6	288	0	0	0	1	1	0	0	0	1	1	0	2
11	59231517	G	T	00010	00010	68	0	69	0	73	0	56	13	48	0	327	0	0	0	1	0	0	0	0	1	0	0	1
11	61952823	G	A	00010	00010	42	0	31	0	37	0	34	12	39	0	195	0	0	0	1	0	0	0	0	1	0	0	1
11	63882123	A	G	11000	11101	28	3	31	5	29	2	26	0	35	3	162	1	1	0	0	0	1	1	1	0	1	2	4
11	67353948	C	A	00011	00011	30	0	36	0	24	0	25	10	21	4	150	0	0	0	1	1	0	0	0	1	1	0	2
11	67355573	C	T	00011	00011	42	0	42	0	51	0	28	10	26	11	210	0	0	0	1	1	0	0	0	1	1	0	2
11	67357526	C	G	00011	00011	40	0	34	0	41	0	32	11	18	12	188	0	0	0	1	1	0	0	0	1	1	0	2
11	67359763	C	G	00011	00011	48	0	45	0	36	0	27	17	28	11	212	0	0	0	1	1	0	0	0	1	1	0	2
11	67360487	C	T	00011	00011	20	1	29	0	30	1	38	15	27	8	169	0	0	0	1	1	0	0	0	1	1	0	2
11	67361412	C	T	00011	00011	36	0	30	0	37	0	44	6	30	8	191	0	0	0	1	1	0	0	0	1	1	0	2
11	67361484	C	T	00011	00011	47	0	39	0	35	0	35	9	21	6	192	0	0	0	1	1	0	0	0	1	1	0	2
11	67963887	C	T	00010	00010	50	0	62	0	64	0	37	8	36	1	258	0	0	0	1	0	0	0	0	1	0	0	1
11	72107740	G	C	00011	00011	62	0	51	0	67	0	38	14	34	14	280	0	0	0	1	1	0	0	0	1	1	0	2
11	72275384	G	A	00011	00011	49	0	26	0	38	0	34	17	39	14	217	0	0	0	1	1	0	0	0	1	1	0	2
11	72483349	T	C	10111	10111	21	4	22	1	17	5	26	2	30	5	133	1	0	1	1	1	1	0	1	1	1	0	4
11	73327520	A	G	00100	00100	46	0	52	0	37	6	51	0	58	0	250	0	0	1	0	0	0	0	1	0	0	0	1
11	73499116	C	A	00110	10111	38	9	23	1	22	5	26	7	33	4	168	0	0	1	1	0	1	0	1	1	1	2	4
11	74992894	G	A	00010	00010	36	0	24	0	30	0	19	14	40	1	164	0	0	0	1	0	0	0	0	1	0	0	1
11	75201155	G	A	00010	00010	35	0	29	0	30	0	20	11	46	0	171	0	0	0	1	0	0	0	0	1	0	0	1
11	75585278	T	C	00001	00001	65	0	65	0	68	0	54	0	38	17	307	0	0	0	0	1	0	0	0	0	1	0	1
11	75770236	A	G	00001	00001	61	0	64	0	69	0	55	0	50	7	306	0	0	0	0	1	0	0	0	0	1	0	1
11	76125317	G	A	00010	00010	39	0	51	0	47	0	38	14	36	0	225	0	0	0	1	0	0	0	0	1	0	0	1
11	79120342	G	T	00011	00011	58	0	43	1	54	0	44	12	49	14	275	0	0	0	1	1	0	0	0	1	1	0	2
11	81087398	G	A	00001	00001	82	0	89	0	73	0	51	0	54	9	358	0	0	0	0	1	0	0	0	0	1	0	1
11	81133063	C	T	00011	00011	52	1	46	0	54	0	40	12	36	15	256	0	0	0	1	1	0	0	0	1	1	0	2
11	81786096	C	T	00011	00011	73	1	73	0	65	0	41	14	52	19	338	0	0	0	1	1	0	0	0	1	1	0	2
11	81791590	G	C	00100	00100	71	0	71	0	69	10	60	0	70	0	351	0	0	1	0	0	0	0	1	0	0	0	1
11	82753541	A	T	00100	00100	51	0	57	0	66	9	46	0	53	0	282	0	0	1	0	0	0	0	1	0	0	0	1
11	83624573	G	T	00011	00011	46	0	46	0	55	0	40	7	35	9	238	0	0	0	1	1	0	0	0	1	1	0	2
11	84184760	T	G	00010	00010	63	0	62	0	73	0	29	7	60	0	294	0	0	0	1	0	0	0	0	1	0	0	1
11	84391261	C	A	00001	00011	43	1	65	0	64	1	66	2	44	7	293	0	0	0	0	1	0	0	0	1	1	1	2
11	88551367	G	A	00011	00011	48	0	77	0	72	0	30	12	39	18	296	0	0	0	1	1	0	0	0	1	1	0	2
11	88614883	A	G	10000	11101	56	8	64	2	75	6	45	1	56	4	317	1	0	0	0	0	1	1	1	0	1	3	4
11	88904240	A	G	00011	00011	73	0	74	1	82	0	45	16	48	16	355	0	0	0	1	1	0	0	0	1	1	0	2
11	88938066	G	A	00011	10011	68	2	71	0	62	0	55	17	54	13	342	0	0	0	1	1	1	0	0	1	1	1	3
11	90552267	T	C	01000	01000	58	0	54	8	85	0	60	0	67	0	332	0	1	0	0	0	0	1	0	0	0	0	1
11	91174358	G	T	00010	00010	43	0	60	1	60	0	40	9	48	0	261	0	0	0	1	0	0	0	0	1	0	0	1
11	91236392	T	C	00011	00011	71	0	63	0	67	0	31	10	46	19	307	0	0	0	1	1	0	0	0	1	1	0	2
11	91401973	C	A	00011	00011	53	0	58	0	49	1	44	28	28	17	278	0	0	0	1	1	0	0	0	1	1	0	2
11	92113145	G	A	01000	01000	54	1	35	8	46	0	54	0	51	0	249	0	1	0	0	0	0	1	0	0	0	0	1
11	92713642	G	A	00100	00100	27	0	43	0	39	8	54	0	34	1	206	0	0	1	0	0	0	0	1	0	0	0	1
11	94633248	G	C	00010	00010	76	0	70	0	69	0	46	11	64	0	336	0	0	0	1	0	0	0	0	1	0	0	1
11	94988988	C	T	00001	00001	55	0	52	0	62	0	53	0	57	7	286	0	0	0	0	1	0	0	0	0	1	0	1
11	95826143	C	T	00011	00011	44	0	55	0	64	0	34	9	41	9	256	0	0	0	1	1	0	0	0	1	1	0	2
11	96631377	G	A	00100	00100	60	0	60	0	46	8	44	0	58	1	277	0	0	1	0	0	0	0	1	0	0	0	1
11	96901292	C	T	00011	00011	35	0	41	0	38	1	29	13	41	12	210	0	0	0	1	1	0	0	0	1	1	0	2
11	97059065	C	A	00010	00010	58	0	64	0	88	0	56	11	63	0	340	0	0	0	1	0	0	0	0	1	0	0	1
11	99460951	A	G	00001	00001	55	0	69	0	70	0	54	0	62	9	319	0	0	0	0	1	0	0	0	0	1	0	1
11	99673878	T	G	00010	00010	31	0	36	0	53	0	56	8	26	0	210	0	0	0	1	0	0	0	0	1	0	0	1
11	99979979	G	A	00011	00011	56	0	46	0	47	0	39	18	33	12	251	0	0	0	1	1	0	0	0	1	1	0	2
11	101160839	T	C	00100	01100	57	0	67	2	38	21	71	0	57	1	314	0	0	1	0	0	0	1	1	0	0	1	2
11	102980635	C	T	00011	00011	49	0	60	0	58	0	35	18	48	15	283	0	0	0	1	1	0	0	0	1	1	0	2
11	104251224	C	T	00011	00011	76	1	66	0	78	0	49	12	50	19	351	0	0	0	1	1	0	0	0	1	1	0	2
11	104646059	G	T	00010	00010	70	1	60	0	66	0	34	15	51	0	297	0	0	0	1	0	0	0	0	1	0	0	1
11	105296792	C	T	01000	01000	47	0	49	14	43	1	55	0	39	0	248	0	1	0	0	0	0	1	0	0	0	0	1
11	106642973	C	G	00011	00011	61	0	62	1	68	0	35	14	47	18	306	0	0	0	1	1	0	0	0	1	1	0	2
11	107904408	G	A	00011	00011	56	0	61	0	66	1	48	10	35	14	291	0	0	0	1	1	0	0	0	1	1	0	2
11	109138353	T	A	00011	00011	58	1	47	0	47	0	37	12	38	13	253	0	0	0	1	1	0	0	0	1	1	0	2
11	110290863	G	A	00011	00011	42	0	50	0	51	0	34	20	41	10	248	0	0	0	1	1	0	0	0	1	1	0	2
11	111356607	A	G	00011	00011	71	0	95	0	73	0	35	17	50	7	348	0	0	0	1	1	0	0	0	1	1	0	2
11	112009736	A	G	00011	00011	58	0	46	0	50	0	32	8	38	13	245	0	0	0	1	1	0	0	0	1	1	0	2
11	115363425	G	C	00100	00100	67	0	54	0	58	8	57	0	59	0	303	0	0	1	0	0	0	0	1	0	0	0	1
11	116749112	T	A	00010	10010	36	2	32	0	30	0	26	5	26	1	158	0	0	0	1	0	1	0	0	1	0	1	2
11	119050596	C	T	00011	00011	20	0	31	0	27	0	33	9	20	11	151	0	0	0	1	1	0	0	0	1	1	0	2
11	120839075	C	T	00010	00010	42	0	51	0	64	0	45	9	43	0	254	0	0	0	1	0	0	0	0	1	0	0	1
11	121384703	C	T	01000	01000	45	0	24	7	38	0	49	0	39	0	202	0	1	0	0	0	0	1	0	0	0	0	1
11	121969414	C	T	00010	00011	72	0	81	0	76	0	43	8	56	4	340	0	0	0	1	0	0	0	0	1	1	1	2
11	122731481	G	T	00010	00010	40	0	48	0	44	0	43	7	43	0	225	0	0	0	1	0	0	0	0	1	0	0	1
11	122982824	A	T	00010	00010	47	0	58	0	66	0	38	6	63	0	278	0	0	0	1	0	0	0	0	1	0	0	1
11	124260933	A	T	00001	00001	61	0	71	0	47	0	46	0	40	20	285	0	0	0	0	1	0	0	0	0	1	0	1
11	124627319	C	A	00010	00010	47	1	43	0	43	0	29	13	49	1	226	0	0	0	1	0	0	0	0	1	0	0	1
11	124983853	T	A	00011	00011	29	0	51	0	50	0	39	14	40	13	236	0	0	0	1	1	0	0	0	1	1	0	2
11	125727613	G	A	00011	00011	39	0	45	0	29	0	45	18	28	7	211	0	0	0	1	1	0	0	0	1	1	0	2
11	126897571	G	A	00011	00011	41	1	43	0	66	0	34	12	32	14	243	0	0	0	1	1	0	0	0	1	1	0	2
11	127480438	G	C	00010	00010	54	0	52	0	60	0	34	9	52	0	261	0	0	0	1	0	0	0	0	1	0	0	1
11	127688663	G	A	00001	00011	62	0	57	0	67	0	61	2	36	11	296	0	0	0	0	1	0	0	0	1	1	1	2
11	127892997	G	C	10011	10011	54	5	45	1	62	0	30	6	40	8	251	1	0	0	1	1	1	0	0	1	1	0	3
11	127999051	C	T	00011	00011	48	0	67	0	57	0	46	9	30	10	267	0	0	0	1	1	0	0	0	1	1	0	2
11	128000520	C	G	00011	00011	63	0	62	0	60	0	34	11	33	10	273	0	0	0	1	1	0	0	0	1	1	0	2
11	131349741	G	T	00001	00001	42	0	56	1	53	0	45	0	38	7	242	0	0	0	0	1	0	0	0	0	1	0	1
11	132294489	G	A	00010	00010	39	0	39	1	43	0	38	13	29	1	203	0	0	0	1	0	0	0	0	1	0	0	1
11	132760038	C	A	00001	00001	58	0	58	0	80	0	62	0	35	22	315	0	0	0	0	1	0	0	0	0	1	0	1
11	134304784	C	A	10001	11011	16	4	25	2	31	1	36	3	20	4	142	1	0	0	0	1	1	1	0	1	1	2	4
11	134918187	G	T	00010	00010	30	0	38	0	43	0	24	14	39	0	188	0	0	0	1	0	0	0	0	1	0	0	1
12	454623	G	C	00011	00011	57	0	60	0	61	0	39	19	43	15	294	0	0	0	1	1	0	0	0	1	1	0	2
12	949670	A	T	00011	00011	71	0	56	0	63	0	34	20	42	15	301	0	0	0	1	1	0	0	0	1	1	0	2
12	1051082	C	T	00010	00010	36	0	46	0	43	0	46	12	64	0	247	0	0	0	1	0	0	0	0	1	0	0	1
12	2743495	C	T	00011	00011	51	0	39	0	51	0	24	10	38	7	220	0	0	0	1	1	0	0	0	1	1	0	2
12	5325239	G	A	00011	00011	26	0	31	0	26	0	31	8	25	5	152	0	0	0	1	1	0	0	0	1	1	0	2
12	7665688	A	G	10000	10000	54	7	59	0	54	0	51	0	64	0	289	1	0	0	0	0	1	0	0	0	0	0	1
12	11521741	T	C	00001	00001	68	0	67	0	63	0	69	0	51	12	330	0	0	0	0	1	0	0	0	0	1	0	1
12	14555385	T	C	00011	00011	63	0	57	0	59	0	39	15	57	12	302	0	0	0	1	1	0	0	0	1	1	0	2
12	15095699	G	A	00011	00011	54	0	67	0	46	0	49	14	42	16	288	0	0	0	1	1	0	0	0	1	1	0	2
12	15925045	C	G	00011	00011	52	0	60	0	56	0	33	17	51	12	281	0	0	0	1	1	0	0	0	1	1	0	2
12	18904024	G	A	00001	00001	49	0	66	0	60	0	55	0	58	10	298	0	0	0	0	1	0	0	0	0	1	0	1
12	19712156	C	T	00011	00011	48	0	60	0	59	0	40	18	41	11	277	0	0	0	1	1	0	0	0	1	1	0	2
12	19739578	T	A	00001	00001	33	0	41	1	32	0	33	0	28	8	176	0	0	0	0	1	0	0	0	0	1	0	1
12	22265394	A	G	00011	00011	56	0	76	0	57	1	41	11	41	15	298	0	0	0	1	1	0	0	0	1	1	0	2
12	22382372	G	A	01000	01000	47	0	37	7	50	0	57	0	42	0	240	0	1	0	0	0	0	1	0	0	0	0	1
12	24745316	G	A	00011	00011	61	1	65	0	70	1	43	14	31	10	296	0	0	0	1	1	0	0	0	1	1	0	2
12	27619190	A	C	00110	11110	40	3	51	2	45	7	36	4	42	1	231	0	0	1	1	0	1	1	1	1	0	2	4
12	27619228	C	G	10110	11110	28	3	47	2	44	7	31	4	48	1	215	1	0	1	1	0	1	1	1	1	0	1	4
12	27619243	G	C	00110	11110	32	3	50	2	42	7	37	4	52	1	230	0	0	1	1	0	1	1	1	1	0	2	4
12	30610892	G	A	01000	01000	47	0	51	10	41	0	46	1	45	0	241	0	1	0	0	0	0	1	0	0	0	0	1
12	34317780	C	T	10111	10111	24	3	33	1	44	4	41	7	30	5	192	1	0	1	1	1	1	0	1	1	1	0	4
12	34404724	G	A	00011	00011	43	0	49	1	37	0	24	13	32	15	214	0	0	0	1	1	0	0	0	1	1	0	2
12	37908587	G	A	01000	01011	34	1	44	6	52	0	48	3	37	2	227	0	1	0	0	0	0	1	0	1	1	2	3
12	37908588	C	A	01000	01010	34	1	43	6	53	0	47	3	36	1	224	0	1	0	0	0	0	1	0	1	0	1	2
12	37935134	T	G	10000	11101	16	5	27	2	27	2	39	1	23	3	145	1	0	0	0	0	1	1	1	0	1	3	4
12	38459545	C	A	00011	00011	55	0	61	0	52	0	38	9	40	15	270	0	0	0	1	1	0	0	0	1	1	0	2
12	38591112	T	A	00001	01111	46	1	48	4	42	2	43	3	28	5	222	0	0	0	0	1	0	1	1	1	1	3	4
12	38996329	C	A	00011	00011	61	0	74	0	70	1	43	19	44	18	330	0	0	0	1	1	0	0	0	1	1	0	2
12	40676250	G	A	00011	00011	37	0	58	0	50	0	42	16	29	16	248	0	0	0	1	1	0	0	0	1	1	0	2
12	41026240	C	T	00011	00011	67	0	59	0	87	0	41	13	54	15	336	0	0	0	1	1	0	0	0	1	1	0	2
12	43946206	C	A	00010	00011	28	0	33	0	25	0	24	12	24	4	150	0	0	0	1	0	0	0	0	1	1	1	2
12	44326657	G	A	01000	01000	44	0	53	10	69	0	54	0	64	0	294	0	1	0	0	0	0	1	0	0	0	0	1
12	44783740	G	T	01000	01000	61	0	51	15	77	0	40	0	49	0	293	0	1	0	0	0	0	1	0	0	0	0	1
12	45540529	C	G	01000	01000	39	0	37	6	53	0	52	0	42	0	229	0	1	0	0	0	0	1	0	0	0	0	1
12	47031946	A	G	11101	11101	28	7	34	6	42	14	45	0	42	5	223	1	1	1	0	1	1	1	1	0	1	0	4
12	47648115	A	C	10000	10101	45	6	68	1	74	2	57	1	48	3	305	1	0	0	0	0	1	0	1	0	1	2	3
12	49034009	C	A	00011	00011	50	0	47	0	43	0	40	12	27	6	225	0	0	0	1	1	0	0	0	1	1	0	2
12	51860859	G	A	00011	00011	60	0	55	0	52	1	36	11	40	8	263	0	0	0	1	1	0	0	0	1	1	0	2
12	52002581	T	C	00100	00100	36	0	60	0	58	7	56	0	50	0	267	0	0	1	0	0	0	0	1	0	0	0	1
12	53438768	G	A	00001	00001	48	0	50	0	52	0	43	1	28	5	227	0	0	0	0	1	0	0	0	0	1	0	1
12	54284022	T	A	00011	00011	41	0	52	0	57	0	37	8	38	13	246	0	0	0	1	1	0	0	0	1	1	0	2
12	54986340	C	A	01000	01000	33	0	22	7	29	0	29	0	22	0	142	0	1	0	0	0	0	1	0	0	0	0	1
12	55435006	A	T	00011	00011	62	0	53	0	49	0	44	15	38	10	271	0	0	0	1	1	0	0	0	1	1	0	2
12	58107802	A	T	00011	00011	40	0	48	0	46	1	29	6	24	7	201	0	0	0	1	1	0	0	0	1	1	0	2
12	58221875	T	A	00011	00011	35	0	33	0	31	1	27	6	22	4	159	0	0	0	1	1	0	0	0	1	1	0	2
12	58636694	T	A	00011	00011	45	0	59	0	64	0	35	14	55	16	288	0	0	0	1	1	0	0	0	1	1	0	2
12	58772964	G	A	00010	00011	69	0	49	0	77	0	44	9	45	4	297	0	0	0	1	0	0	0	0	1	1	1	2
12	58857279	G	A	00011	00011	53	0	44	0	58	0	50	7	24	14	250	0	0	0	1	1	0	0	0	1	1	0	2
12	59148895	C	T	00011	00011	64	0	70	0	76	0	52	14	48	10	334	0	0	0	1	1	0	0	0	1	1	0	2
12	60994241	G	A	00100	00100	61	0	66	0	73	9	65	0	54	0	328	0	0	1	0	0	0	0	1	0	0	0	1
12	63946394	T	C	10100	11100	31	3	50	4	41	6	31	1	34	1	202	1	0	1	0	0	1	1	1	0	0	1	3
12	63946413	G	T	10100	11100	35	3	53	4	39	6	38	1	38	0	217	1	0	1	0	0	1	1	1	0	0	1	3
12	69486056	G	A	00010	00010	34	0	49	0	42	0	36	11	52	0	224	0	0	0	1	0	0	0	0	1	0	0	1
12	70326913	C	G	00011	00011	56	0	46	0	56	0	37	20	40	9	264	0	0	0	1	1	0	0	0	1	1	0	2
12	71128677	C	T	00001	00011	46	0	51	0	61	0	45	3	30	9	245	0	0	0	0	1	0	0	0	1	1	1	2
12	71454299	C	G	01000	01000	56	0	42	9	58	0	57	0	47	0	269	0	1	0	0	0	0	1	0	0	0	0	1
12	72792231	A	T	00011	00011	54	0	65	0	92	0	32	11	51	17	322	0	0	0	1	1	0	0	0	1	1	0	2
12	73022487	G	T	01000	01000	74	0	62	14	67	0	52	0	47	0	316	0	1	0	0	0	0	1	0	0	0	0	1
12	74588056	T	A	00011	00011	71	0	75	0	66	0	37	9	50	7	315	0	0	0	1	1	0	0	0	1	1	0	2
12	75399581	G	C	00011	00011	54	1	76	0	69	0	39	14	35	15	303	0	0	0	1	1	0	0	0	1	1	0	2
12	75466323	C	A	00010	00011	68	0	86	1	71	0	40	13	56	2	337	0	0	0	1	0	0	0	0	1	1	1	2
12	75819264	C	G	00100	00100	38	0	46	0	39	9	32	0	48	0	212	0	0	1	0	0	0	0	1	0	0	0	1
12	76791437	T	C	00011	00011	93	0	76	0	82	0	46	15	48	14	374	0	0	0	1	1	0	0	0	1	1	0	2
12	77838199	C	T	00011	00011	59	0	59	0	92	1	43	14	49	23	340	0	0	0	1	1	0	0	0	1	1	0	2
12	79809857	T	C	00001	00001	67	0	82	0	71	0	67	0	84	12	383	0	0	0	0	1	0	0	0	0	1	0	1
12	80474472	G	T	01001	11001	41	4	31	6	42	1	43	1	41	5	215	0	1	0	0	1	1	1	0	0	1	1	3
12	80521827	G	A	01001	11011	63	2	65	7	83	1	57	4	47	5	334	0	1	0	0	1	1	1	0	1	1	2	4
12	80583121	T	C	00010	00010	52	0	70	0	53	0	45	7	46	1	274	0	0	0	1	0	0	0	0	1	0	0	1
12	90962263	C	A	00011	00011	58	0	54	0	65	0	28	10	40	8	263	0	0	0	1	1	0	0	0	1	1	0	2
12	92213270	G	A	00010	00010	54	0	56	0	67	0	51	12	59	1	300	0	0	0	1	0	0	0	0	1	0	0	1
12	92424829	A	T	00001	00001	60	1	73	0	53	0	65	0	42	12	306	0	0	0	0	1	0	0	0	0	1	0	1
12	93798142	T	G	00001	00001	68	0	59	0	51	0	55	0	51	14	298	0	0	0	0	1	0	0	0	0	1	0	1
12	94245153	G	A	00011	00011	37	0	41	0	49	0	48	15	30	11	231	0	0	0	1	1	0	0	0	1	1	0	2
12	95233211	C	T	00011	00011	38	0	42	1	33	0	34	14	19	4	185	0	0	0	1	1	0	0	0	1	1	0	2
12	96049868	G	A	00100	00100	45	0	49	0	26	14	61	0	50	1	246	0	0	1	0	0	0	0	1	0	0	0	1
12	96569495	T	C	00100	00100	38	0	43	0	42	7	42	0	34	0	206	0	0	1	0	0	0	0	1	0	0	0	1
12	96905452	G	A	11000	11011	41	6	31	6	52	1	52	3	50	4	246	1	1	0	0	0	1	1	0	1	1	2	4
12	99869136	T	A	00010	00010	62	1	63	0	53	1	36	10	43	0	269	0	0	0	1	0	0	0	0	1	0	0	1
12	100709550	A	G	00011	00011	79	0	91	0	84	0	47	16	36	23	376	0	0	0	1	1	0	0	0	1	1	0	2
12	109336832	G	A	00010	00010	40	0	36	0	37	0	25	12	41	0	191	0	0	0	1	0	0	0	0	1	0	0	1
12	112312422	A	G	01100	11101	21	2	25	4	28	4	42	1	32	2	161	0	1	1	0	0	1	1	1	0	1	2	4
12	113665100	C	T	00010	00010	52	0	38	0	38	0	44	8	45	0	225	0	0	0	1	0	0	0	0	1	0	0	1
12	115320218	A	G	00011	00011	53	0	37	0	62	0	38	14	41	12	257	0	0	0	1	1	0	0	0	1	1	0	2
12	117304346	G	T	00001	00001	26	0	29	1	45	0	31	1	47	8	188	0	0	0	0	1	0	0	0	0	1	0	1
12	118789208	T	G	01000	01000	52	0	49	8	73	0	48	0	59	0	289	0	1	0	0	0	0	1	0	0	0	0	1
12	119204149	T	C	00011	00011	57	0	48	0	47	0	40	15	26	7	240	0	0	0	1	1	0	0	0	1	1	0	2
12	119936673	A	C	01000	01000	41	0	25	7	43	0	31	0	33	0	180	0	1	0	0	0	0	1	0	0	0	0	1
12	120109451	G	C	01000	01000	38	0	36	9	53	0	49	0	67	0	252	0	1	0	0	0	0	1	0	0	0	0	1
12	121088533	C	G	00011	00011	30	0	24	0	46	0	26	14	25	6	171	0	0	0	1	1	0	0	0	1	1	0	2
12	121945377	A	C	00011	00011	23	0	29	0	26	1	26	6	18	9	138	0	0	0	1	1	0	0	0	1	1	0	2
12	122222227	G	C	01111	01111	34	1	23	3	32	3	32	6	25	5	164	0	1	1	1	1	0	1	1	1	1	0	4
12	126257016	A	G	01000	01000	50	0	34	10	46	1	41	0	40	0	222	0	1	0	0	0	0	1	0	0	0	0	1
12	126406619	G	T	00001	00001	42	1	49	0	51	0	50	0	38	10	241	0	0	0	0	1	0	0	0	0	1	0	1
12	128014551	A	G	00001	10011	42	2	45	1	49	1	48	3	26	5	222	0	0	0	0	1	1	0	0	1	1	2	3
12	128369484	T	C	00110	10111	39	2	39	1	36	7	41	4	52	2	223	0	0	1	1	0	1	0	1	1	1	2	4
12	129811791	G	A	00011	00011	28	0	43	0	40	0	34	18	28	5	196	0	0	0	1	1	0	0	0	1	1	0	2
12	130275807	G	A	00001	00001	46	0	49	0	48	0	53	1	36	16	249	0	0	0	0	1	0	0	0	0	1	0	1
12	130357688	G	A	00010	00010	35	0	31	0	53	0	47	7	28	0	201	0	0	0	1	0	0	0	0	1	0	0	1
12	130575408	A	G	10011	10011	18	3	20	0	25	1	21	7	20	3	118	1	0	0	1	1	1	0	0	1	1	0	3
12	130575409	C	T	00011	10111	18	2	20	0	23	2	23	7	21	3	119	0	0	0	1	1	1	0	1	1	1	2	4
12	131021334	G	A	00001	00001	45	0	38	0	34	0	52	0	29	8	206	0	0	0	0	1	0	0	0	0	1	0	1
12	132926550	C	T	11000	11000	18	7	19	3	21	1	27	0	29	1	126	1	1	0	0	0	1	1	0	0	0	0	2
13	19764881	C	T	00001	00001	37	0	39	0	47	0	48	0	39	13	223	0	0	0	0	1	0	0	0	0	1	0	1
13	23169981	C	A	00011	00011	40	0	49	0	66	1	36	20	31	15	258	0	0	0	1	1	0	0	0	1	1	0	2
13	25669481	G	T	00010	00110	38	0	41	1	38	3	37	6	30	1	195	0	0	0	1	0	0	0	1	1	0	1	2
13	27617716	A	G	00111	10111	48	5	33	0	46	6	31	7	41	5	222	0	0	1	1	1	1	0	1	1	1	1	4
13	27913364	C	T	00011	00011	52	0	53	0	44	0	31	18	47	16	261	0	0	0	1	1	0	0	0	1	1	0	2
13	30341615	A	G	00011	00011	80	0	75	0	69	0	52	25	53	17	371	0	0	0	1	1	0	0	0	1	1	0	2
13	32355307	C	T	00010	00110	52	0	46	0	52	2	45	8	50	0	255	0	0	0	1	0	0	0	1	1	0	1	2
13	34436124	T	A	00001	00011	59	1	76	0	73	0	55	4	51	8	327	0	0	0	0	1	0	0	0	1	1	1	2
13	36903177	G	A	01000	01000	42	1	54	10	73	0	41	0	51	0	272	0	1	0	0	0	0	1	0	0	0	0	1
13	37052679	T	C	00011	00011	70	0	74	0	78	0	48	11	53	8	342	0	0	0	1	1	0	0	0	1	1	0	2
13	39875270	T	C	00100	00100	60	0	71	0	44	16	60	0	59	0	310	0	0	1	0	0	0	0	1	0	0	0	1
13	43194630	T	A	00010	00010	50	0	57	0	52	0	28	9	45	0	241	0	0	0	1	0	0	0	0	1	0	0	1
13	43268473	C	T	00010	01110	20	0	44	2	38	2	36	6	31	1	180	0	0	0	1	0	0	1	1	1	0	2	3
13	45073917	T	C	01000	01000	57	0	45	10	71	0	57	0	33	0	273	0	1	0	0	0	0	1	0	0	0	0	1
13	46905655	G	C	00011	00011	50	0	50	0	57	0	46	14	36	9	262	0	0	0	1	1	0	0	0	1	1	0	2
13	47803714	C	A	00100	00100	44	0	38	0	54	7	47	0	40	0	230	0	0	1	0	0	0	0	1	0	0	0	1
13	47961721	G	A	00001	00001	53	1	56	1	50	0	63	1	33	7	265	0	0	0	0	1	0	0	0	0	1	0	1
13	47991516	G	T	00011	00011	52	0	44	0	60	0	24	14	49	11	254	0	0	0	1	1	0	0	0	1	1	0	2
13	48101813	T	C	00011	00011	60	0	65	0	81	0	35	18	41	6	306	0	0	0	1	1	0	0	0	1	1	0	2
13	51386883	T	G	00011	00011	64	0	60	0	75	0	31	9	31	8	278	0	0	0	1	1	0	0	0	1	1	0	2
13	51489061	G	A	00011	00011	48	0	57	0	68	0	36	10	52	18	289	0	0	0	1	1	0	0	0	1	1	0	2
13	53281504	G	C	10011	11011	20	6	19	2	28	0	36	7	29	3	150	1	0	0	1	1	1	1	0	1	1	1	4
13	55448149	C	T	00011	00011	54	0	73	0	59	0	32	9	37	14	278	0	0	0	1	1	0	0	0	1	1	0	2
13	56184184	G	A	00010	00010	59	0	72	0	68	0	39	10	60	1	309	0	0	0	1	0	0	0	0	1	0	0	1
13	56466256	T	A	00011	00011	54	0	66	0	60	0	42	9	42	12	285	0	0	0	1	1	0	0	0	1	1	0	2
13	56585578	T	C	01000	01000	71	0	44	16	68	0	55	1	65	0	320	0	1	0	0	0	0	1	0	0	0	0	1
13	56652365	C	A	00100	00100	56	1	70	0	69	10	69	0	70	0	345	0	0	1	0	0	0	0	1	0	0	0	1
13	57452041	G	A	00011	00011	75	0	77	0	86	0	43	13	41	13	348	0	0	0	1	1	0	0	0	1	1	0	2
13	57999801	C	A	00011	00011	42	0	41	0	52	0	42	14	35	11	237	0	0	0	1	1	0	0	0	1	1	0	2
13	58463846	T	C	00010	00010	68	0	71	0	95	0	52	10	78	1	375	0	0	0	1	0	0	0	0	1	0	0	1
13	58541638	A	C	10000	10000	58	12	70	0	81	1	50	0	55	0	327	1	0	0	0	0	1	0	0	0	0	0	1
13	58655804	G	A	00011	00011	49	0	70	0	63	0	30	14	48	10	284	0	0	0	1	1	0	0	0	1	1	0	2
13	58699169	C	T	00010	01011	50	1	65	2	54	0	36	7	56	2	273	0	0	0	1	0	0	1	0	1	1	2	3
13	58971959	T	C	01000	01000	69	0	63	8	60	0	72	0	66	0	338	0	1	0	0	0	0	1	0	0	0	0	1
[truncated: 725 more rows]

## Sheet: P4
#CHR	POS	REF	ALT	GATK	EOA	Lymph:ref	Lymph:alt	CCL_cl:ref	CCL_cl:alt	CCL:ref	CCL:alt	IDC:ref	IDC:alt	Total Coverage
[truncated: 3,172 more rows]

[truncated: 2 more sheets: P5, P6]
