# Supplementary material for: Genome evolution during progression to breast cancer
Source: HighWire-hosted journal article supplement (doi:10.1101/gr.151670.112), 2013-04-08
Supplement: Supplemental_Material.docx [file Supplemental_Material.docx]

**Supplemental Material for Newburger et al: Validation of SNV calls and phylogenetic classes by targeted PCR**

Validation Design

We designed primers to target a random subset of SNVs within each sample-specific and phylogenetic class for validation, using target-specific PCR amplification followed by sequencing. We focused on Patients 2 and 6 because their lesions have the greatest phylogenetic complexity (Fig. 5) and therefore constitute the most stringent test of the main results of our study. 192 and 196 primer sets were designed for Patients 2 and 6, respectively, such that each SNV to be validated was within approximately 40 bases of the sequence start site. Primer design was optimized for multiplexing. Primers contained Illumina linker sequences to facilitate sequencing. The initial target-specific multiplex PCR was performed with slow-annealing. A second PCR using Illumina-compatible primers added barcodes and yielded preparative amounts of material. All barcoded samples from a single patient were combined into a single lane of HiSeq2000 for sequencing.

For Patient 2, 192 of 192 targets successfully generated enough reads to support validation, with a mean coverage (number of reads per target per sample) of almost 190,000. For Patient 6, 195 of 196 targets were successful, with a mean coverage of just over 43,000.

Amplification and sequencing were performed with all targets (each pool containing all PCR 196 patient-specific primer pairs) on all samples (which were amplified separately) of each patient. This design supported two levels of validation for both patients, which we denote A and B. Two more types of validation, C and D, were possible in Patient 6. For a visual representation of the results from Patient 6 please see Supplemental Fig. S4.

Validation A

Validation A is the simplest of the four approaches. It asks whether the validation PCR/sequencing supports the initial SNV call at all, i.e., whether the alternate allele is detectable well above background in at least one sample.

A for Patient 2 is 192/192 = 100%.

A for Patient 6 is 180/195 = 92%.

12 of the false positives of Patient 6 are SNVs that had initially been called as private to the ENA sample. Excluding the ENA-only calls, the validation rate improves to 172/175 = 98%.

In this context, we note that SNVs that are present in the ENA and also in another sample have a much better validation rate than those present in the ENA alone, due to the additional signal provided by the other samples.

We conclude that our initial SNV calls had a high degree of specificity. SNVs present in more than one sample, which comprise the classes that are most important for our study, have an almost perfect validation rate.

Validation B

Validation B addresses sample-specificity and whether the assignment of an SNV to a specific class, especially to a phylogenetically informative class, was correct. The most stringent metric is to ask what fraction of SNVs are validated to be present in precisely the same set of samples as the initial assignment based on the whole genome sequence, and to count each with a misassignment as incorrect. It uses those SNVs that were validated to be present (validation A).

B for Patient 2 is 180/192 = 94%.

11 of the 12 miscalls involve an SNV that was initially called as IDC-only, but is in fact an SNV shared between the EN and the IDC. Recall that this class had low alternate allele frequencies in the EN, so these were simply missed in the genome-wide data due to their very low frequency.

B for Patient 6 is 176/180 = 98%.

In summary, our class assignments are highly accurate and the small amount of error does not affect the study’s results or conclusions in any way.

Validation C

In Patient 6, we were able to go back to the archival tissue and recover additional (separate) IDC material as well as a sample of normal tissue. In what might be called a “biological” validation, we can therefore ask what fraction of SNVs present in the original IDC are also present in the two new IDC samples.

*Class IDC-only*: 18 of the 19 IDC-only SNVs tested also appear in both new IDC samples. The one SNV that is not present in the new IDC samples has the lowest alternate allele frequency in the original IDC sample, indicating that it marks a subclone not present outside of this sample.

*Phylogenetically informative classes that include IDC*: 50 out of 50 SNVs were present in the new IDC samples.

Thus, this validation shows that mutations we find in a single IDC isolate are fully supported by their presence in independent IDC isolates, and that our false-positive rate for this class is effectively zero.

Validation D

The addition of a sample of normal tissue from the ipsilateral breast in close proximity to the other lesions allowed us to ask whether any SNVs we targeted would give a false-positive signal in the validation. The seven SNVs we tested that were shared among all ipsilateral samples were also positive in this normal sample, as expected for SNVs that arose early in breast development; none of the remaining SNVs that were private to one sample or comprised the phylogenetically informative classes (N=188) had signal above background in the normal sample, again underscoring superior specificity of our somatic SNV calls.

**Validation of the “Evidence-of-Presence” criterion**

The validation data also allowed us to examine whether the reassignment of SNVs according to our *evidence-of-presence* criterion improved accuracy over GATK multi-sample calling. As we describe in the manuscript, we first perform the standard GATK multi-sample SNV calling to identify the set of somatic SNVs in a patient. GATK results include class membership, i.e., in which sample the alternate allele of the SNV is present. But we adjust this class membership using our “evidence-of-presence” criterion, which asks whether there is evidence for the alternate allele of an SNV in a sample where GATK did not call it. The logic is as follows: Assume that an SNV is called by GATK in sample A of a given patient, but not in sample B. Assume that in sample B, there are two (or more) reads supporting that SNV. (This situation is common with GATK.) Due to its presence in sample A, the SNV has a high prior probability of being a true somatic SNV in sample B, rather than resulting from coincidence of sequencing errors in the two or more reads supporting it. Recall that typically fewer than 1000 somatic SNVs are called per sample; this is several orders of magnitude fewer positions than the entire genome, and therefore it is possible to use a more sensitive criterion for detection of SNVs in these positions than for *de novo* discovery in the entire genome, without increasing the false positive rate substantially. The validation data show that application of the evidence-of-presence criterion indeed improves call accuracy over the GATK class assignments:

In Patient 2, 17 SNVs within our validation set had been reassigned according to evidence-of-presence. In 14 out of these 17 cases, the reassignment detected the mutations in samples that were validated, thus improving over GATK calls; in 3 cases the reassignment created a false positive, i.e., detecting an SNV in a sample which was not supported by our validation. Similarly, in Patient 6, of the 14 SNVs within our validation set that were reassigned according to evidence-of-presence, 11 were correctly reassigned, in 3 cases evidence-of-presence called an SNV in one additional false positive sample. In summary, we concluded that evidence-of-presence significantly improved class assignments over GATK.

**Conclusion**

The results from the four approaches to validation reveal the robustness of the genome-wide data, particularly of the phylogenetically informative classes, which form a cornerstone of our study. The results from the assessment of the evidence-of-presence criterion versus original GATK calls underscore the power of multisample calling and the technical robustness of our analytic approaches.

**Supplemental Figure Legends**

**Figure S1. Overall workflow of the project** from clinical sample to genome evolution inference.

**Figure S2. Representative histology for each sample.**

**Figure S3. Read statistics for each sample.** Number of confidently mapped reads is on the Y axis. Horizontal line corresponds to 50x average coverage of the genome, not considering that a small percentage of the genome does not support confident read mapping.

**Figure S4. Alternate allele frequencies in each tested private class (green binary code) or phylogenetically informative class (magenta binary code) of somatic SNVs of Patient 6.** Code denotes the class of SNV as determined by the whole genome sequence analysis. Starred samples were not present in the whole genome analysis. Each SNV corresponds to a bar whose position is repeated stereotypically for each sample. SNVs are sorted by position in the genome. N denotes the number of SNVs (and therefore the number of bars per sample) in each class. Presence/absence patterns from the validation experiment are visible as clustered bars, denoting consistently high alternate allele frequencies of SNVs in the sample. High validation rate and therefore concordance in class assignments is visible as correspondence between the whole-genome-derived presence/absence code and the blocks of above-background alternate allele frequencies.

**Figure S5. Dinucleotide mutation rates for each patient.** Plots are the same as Fig. 2c-e, except that here SNV classes are pooled for each patient. Rates are in units of “substitution per dinucleotide type”, and vary overall between patients because the number of mutations varies from case to case. In all cases, transitions in CpG dincleotides have a much higher rate than all other mutations.

**Figures S6-S11. Rainfall plots** depicting the distance between neighboring somatic SNVs. Y axis is on log10 scale to emphasize clustered SNVs. Chromosomes are colored in order, 1 is first, X is last. Each point represents the distance between an SNV and the previous SNV. Each plot is a phylogenetic class of SNVs, with the samples in which they are found listed on the right. The table below lists all regions in which 4 or more SNVs clustered with an average spacing of 2 kb or less.

| **Patient** | **Chr** | **Start** | **End** | **Number** | **Avg Spacing** | **Samples** |
| --- | --- | --- | --- | --- | --- | --- |
| 2 | 2 | 213236995 | 213240923 | 4 | 982.00 | IDC |
| 2 | 7 | 39124057 | 39125590 | 4 | 383.25 | DCIS |
| 3 | 1 | 155411742 | 155415246 | 5 | 700.80 | DCIS+IDC |
| 3 | 6 | 144020460 | 144028917 | 6 | 1409.50 | DCIS+IDC |
| 3 | 9 | 32772944 | 32778700 | 10 | 575.60 | DCIS+IDC |
| 3 | 11 | 67353948 | 67361484 | 7 | 1076.57 | DCIS+IDC |
| 4 | 17 | 12848709 | 12872423 | 23 | 1031.04 | IDC |
| 5 | 1 | 191761330 | 191765102 | 6 | 628.67 | IDC |
| 5 | 1 | 191871875 | 191879453 | 5 | 1515.60 | IDC |
| 5 | 12 | 115440189 | 115444068 | 6 | 646.50 | IDC |
| 6 | 4 | 18089719 | 18090328 | 4 | 152.25 | DCIS |
| 6 | 14 | 54132251 | 54132444 | 4 | 48.25 | DCIS |
| 6 | 16 | 85848354 | 85854587 | 6 | 1038.83 | ENA+DCIS+IDC |

**Figures S11-S16. Lesser allele fraction plots**. SNVs are arranged by their order in the genome and LAF is plotted for each sample in windows of 1000 SNVs, overlapped by 500. Aneuploidies are visible as precipitous drops in the LAF. Chromosome boundaries are indicated by short vertical lines.

**Figure S17. AAFs** of those SNVs that arose on the same lineage branch as the first Chromosome 1q ploidy gain, in each aneuploid sample. Red points are SNVs on 1q, blue points are SNVs on all euploid chromosomes.
